# Supplementary material for: FUNCTIONALIZED POLYMERIC MEMBRANES FOR BIOSEPARATION AND BIOCATALYSIS
Source: eLife journal article supplement (doi:10.7554/elife.65279), 2007-01-01
Supplement: supp [file elife-65279-supp-v1.zip]

Archive with 33 entries (33 files):
- elife_poa_e65279_Transparent_Reporting_File.pdf
- elife_poa_e65279_Figure_1_figure_supplement_1.pdf
- elife_poa_e65279_Figure_1_figure_supplement_2.pdf
- elife_poa_e65279_Figure_1_figure_supplement_3.pdf
- elife_poa_e65279_Figure_1_figure_supplement_4.pdf
- elife_poa_e65279_Figure_1_figure_supplement_5.pdf
- elife_poa_e65279_Figure_1_figure_supplement_6.pdf
- elife_poa_e65279_Figure_1_figure_supplement_7.pdf
- elife_poa_e65279_Figure_2_figure_supplement_1.pdf
- elife_poa_e65279_Figure_2_figure_supplement_2.pdf
- elife_poa_e65279_Figure_2_figure_supplement_3.pdf
- elife_poa_e65279_Figure_2_figure_supplement_4.pdf
- elife_poa_e65279_Figure_3_figure_supplement_1.pdf
- elife_poa_e65279_Figure_3_figure_supplement_2.pdf
- elife_poa_e65279_Figure_4_figure_supplement_1.pdf
- elife_poa_e65279_Figure_4_figure_supplement_2.pdf
- elife_poa_e65279_Figure_4_figure_supplement_3.pdf
- elife_poa_e65279_Figure_4_figure_supplement_4.pdf
- elife_poa_e65279_Figure_5_figure_supplement_1.pdf
- elife_poa_e65279_Figure_5_figure_supplement_2.pdf
- elife_poa_e65279_Figure_5_figure_supplement_3.pdf
- elife_poa_e65279_Figure_5_figure_supplement_4.pdf
- elife_poa_e65279_Figure_6_figure_supplement_1.pdf
- elife_poa_e65279_Supplementary_file_1.xlsx
- elife_poa_e65279_Supplementary_file_2.docx
- elife_poa_e65279_Supplementary_file_3.docx
- elife_poa_e65279_Supplementary_file_4.docx
- elife_poa_e65279_Figure_1_source_data_1.xlsx
- elife_poa_e65279_Figure_2_source_data_1.xlsx
- elife_poa_e65279_Figure_3_source_data_1.xlsx
- elife_poa_e65279_Figure_4_source_data_1.xlsx
- elife_poa_e65279_Figure_5_source_data_1.xlsx
- elife_poa_e65279_Figure_6_source_data_1.xlsx
