# Supplementary material for: FUNCTIONALIZED POLYMERIC MEMBRANES FOR BIOSEPARATION AND BIOCATALYSIS
Source: eLife journal article supplement (doi:10.7554/elife.65279), 2007-01-01
Supplement: supp [file elife-65279-supp-v1.zip › elife_poa_e65279_Figure_1_source_data_1.xlsx]

## Sheet: source data for main figure
Fig 1A				Fig 1B				Fig 1C						Fig 1D						Fig1E
	-Log10(P value)	Log2(FC)			-Log10(P value)	Log2(FC)		ACP			NPF1			dsGFP	dsACP	dsAKH2	dsNPF1	dsGPB5		dsGFP	dsACP	dsAKH2	dsNPF1	dsGPB5
AKH1	0.356646	-0.638041		OMP	2.92082	-4.24963		CK	FL 1 h		CK	FL 1 h		0.507553	0.23327	0.09809	0.08733	0.48781		1.94527	0.602432	0.208099	0.242028	0.398103
PDF	1.28904	-0.348529		neuroparsin A	1.54061	-2.97292		11.0043	31.5594		0.673617	0.602904		0.513473	0.14208	0.15055	0.11835	0.15659		1.52078	0.383777	0.330998	0.291791	0.190758
PVK-3	0.629857	-0.315441		ETH	2.20761	-2.86971		15.0324	18.0009		0.473029	1.23971		0.16486	0.11061	0.02531	0.69154	0.36805		0.44862	0.339292	0.44485	3.61911	0.346832
ITP	0.0284922	0.0149786		CAPA	0.99439	-1.09322		15.0324	29.8571		0.107321	1.58008		0.09674	0.13997	0.06995	0.16478	0.14808		0.266155	0.345324	0.150796	0.463699	0.269926
Sulfakinin	0.0732975	0.0685671		Sulfakinin	2.49485	-0.996227		11.3137	39.6707		0.198884	1.07923		0.579193	0.09693	0.01429	0.18225	0.37811		1.80353	0.269172	0.055795	0.505922	1.05181
NPF2	0.186286	0.207725		NPLP-1	2.52288	-0.500845								0.07482	0.00118	0.02229	0.11162	0.28519		0.209607	0.082184	0.9651	0.334014	0.943232
ACP	0.798057	0.503318		Tachykinin	1.15305	-0.390912		AKH2			GPB5			0.26782	0.09806	0.158	0.33912	0.00747		0.542113	0.323458	0.377	1.19732	0.126669
Orcokinin	2.16749	0.819563		ITP	0.650334	-0.187295		CK	FL 1 h		CK	FL 1 h		0.117613	0.11261	0.06866	0.45809	0.2616		0.381138	0.370205	0.146273	1.89023	0.793943
CCAP	2.63827	0.84889		Orockinin A	0.865823	0.0877162		28.3792	50.9143		4.25748	1.8025		0.05264	0.09054	0.1688	0.39774	0.10511		0.827496	0.212623	0.043731	1.48082	0.398103
MS	2.09691	0.859395		sNPF	1.04096	0.352088		35.7532	49.9466		3.11666	1.72907		0.237907	0.47304	0.438	0.01427	0.21434		0.52364	1.49892	0.169646	0.036191	0.806007
Tachykinin	2.284	0.908454		Natalisin	0.682145	0.37549		31.779	50.2134		3.36359	1.47427		0.15526	0.02726	0.057	0.00061	0.02985		0.958689	0.084446	0.03016	0.000754	0.110835
allatotropin	0.535064	0.932002		allatotropin	0.535064	0.434537		36.5044	57.2816		3.20428	1.84038		0.299573	0.12844	0.0584	0.08033	0.07024		0.335522	0.541359	0.021112	0.211869	0.174924
sNPF	3.30103	0.950708		Pyrokinin2	2.25964	0.476546								0.04186	0.04042	0.06597	0.680499	0.11444		0.255977	0.094248	0.336276	1.83595	0.432786
Pyrokinin 2	1.57512	0.985504		PVK	2.74473	0.501963								0.112213	0.15956	0.0262	0.04115	0.02621		0.466715	0.404134	0.121391	0.193773	0.182464
NPF1	1.44612	1.01035		Ryamide	0.831503	0.591018								0.0762467	0.09689	0.0126	0.10259	0.22326		0.326475	0.315165	0.01508	0.323458	0.729855
DH46	2.20066	1.01436		AKH1	0.660747	0.65085								0.24432	0.02365	0.02986	0.49805	0.12238		0.050517	0.120637	0.73136	1.52681	0.371713
DH31	1.42597	1.15867		ILP	3.04576	0.661313								0.152087	0.05039	0.10507	0.11307	0.01032		0.840313	0.174924	0.555685	0.292545	0.026389
natalisin	3.52288	1.19396		DH 31	2.63827	0.79722								0.2914	0.1013	0.05501	0.3086	0.0866		0.268794	0.294053	0.192265	1.03748	0.27068
GPB5	0.915066	1.19484		MIP	3.52288	1.03315								0.0910667	0.05697	0.0116	0.17986	0.05842		2.20917	0.171154	0.33175	0.533065	0.179448
Proctolin	1.92445	1.28349		Kinin	2.69897	1.10664								0.55098	0.063	0.01759	0.01996	0.12545		0.400365	0.210361	0.052025	0.061073	0.461437
MIP	3.52288	1.29094		Pyrokinin 1	3.22185	1.11964								0.11796	0.02609	0.0415	0.14747	0.10206		0.993749	0.068612	0.24127	0.474255	0.291791
Kinin	1.35067	1.29365		CCAP	2.63827	1.19754								0.43016	0.07976	0.3192	0.07968	0.13579		1.33907	0.179448	0.091232	0.186234	0.361157
Pyrokinin 4	2.4318	1.31915		MS	2.38722	1.25896								0.32037	0.1275	0.0363		0.16629		0.323458	0.337784	0.12064		0.431278
FMRFa	2.76955	1.44619		allatostatin-A	4	1.44932								0.05151	0.0142	0.01796				0.775848	0.039961	0.049009
Ryamide	2.01323	1.4612		Pyrokinin 4	2.61979	1.46467								0.09754	0.01906					0.701203	0.049763
AST-A	3.69897	1.65121		Corazonin	2.85387	1.48268								0.43565						0.420722
OMP	2.21467	1.75652		DH46	1.48945	1.65827								0.19785						0.331193
ILP	3.39794	1.94876		AKH2	2.85387	1.98645								0.1628						0.760768
CAPA	3.09691	2.03012		NPF1	2.09691	2.12176								0.04839						0.430524
				ACP	3.22185	2.91535								0.27813						0.315919
				GPB5	1.52288	3.21102
				AKH3	1.56225	3.92639

## Sheet: source data for fig S1
ID	5th-Br1	5th-Br2	5th-Br3	A-Br1	A-Br2	A-Br3	5th-RC1	5th-RC2	5th-RC3	A-RC1	A-RC2	A-RC3
Sulfakinin	8851000	22230000	18000000	15865000	16839000	18766000	19700000	20000000	21400000	9630000	10800000	10200000
MS	75927000	44950000	51886000	115460000	99060000	98920000	438000000	468000000	452000000	1090000000	1020000000	1140000000
AKH1	917000	7640000	10600000	3400000	3220000	5690000	10200000000	11400000000	10500000000	17300000000	11100000000	22000000000
Proctolin	2290000	2340000	2140000	4860000	6130000	5490000	134000000	150000000	135000000	182000000	204000000	197000000
PVK	1	1	1	1	1	1	18100000	22700000	22400000	27600000	31000000	30900000
Orockinin A	154620000	203320000	173770000	302800000	316420000	319180000	115000000	112000000	108000000	117000000	119000000	120000000
sNPF	103710000	102250000	96810000	197850000	192760000	194590000	550000000	702000000	774000000	846000000	789000000	951000000
AKH2	1	1	1	1	1	1	108000000	107000000	106000000	405000000	423000000	444000000
Tachykinin	966330000	884182000	795770000	1746740000	1557900000	1662520000	10800000	11800000	11400000	9560000	8740000	7630000
CAPA	44053000	51557000	47638000	196860000	201410000	186810000	743000	863000	903000	1	628000	548000
NPLP-1	1	1	1	1	1	1	17400000	16800000	16600000	11900000	12200000	11800000
Allatotropin	242630000	276450000	275030000	506000000	492860000	516240000	2470000	5050000	5340000	6060000	5160000	6160000
ITP	4090000	3790000	2660000	3760000	3380000	3510000	56400000	40526000	36430000	46690000	41150000	29280000
NPF1	949710000	1085350000	950550000	1571600000	2342400000	2100200000	7050000	12700000	14600000	52200000	48900000	48400000
MIP	354311000	334269000	356656000	849417000	857154000	850993000	38300000	39400000	40600000	78200000	81500000	82400000
Pyrokinin 1	1	1	1	1	1	1	20600000	23700000	22200000	47300000	48400000	48800000
DH 31	2902000	1600000	3480000	5850000	6140000	5830000	7270000	7600000	7170000	12900000	12500000	12900000
CCAP	28330000	26780000	25590000	49700000	48190000	47460000	3470000	4410000	4250000	9190000	9290000	9340000
Pyrokinin 4	73268000	83839000	78836000	202072000	187972000	198679000	1260000000	1320000000	1420000000	3810000000	3660000000	3570000000
Neuroparsin A	1	1	1	1	1	1	10400000	11000000	16600000	1430000	1690000	1720000
OMP	28860000	31840000	31270000	108540000	109380000	92830000	81800000	88800000	92100000	4410000	4410000	4990000
ETH	1	1	1	1	1	1	2860000	2490000	2310000	324000	363000	361000
Allatostatin-A	135721000	100860000	105116000	372614000	347675000	352972000	89800000	85200000	82800000	237000000	234000000	233000000
ACP	12730000	26620000	24990000	26580000	27480000	37140000	204000000	240000000	236000000	1620000000	1740000000	1770000000
ILP	133599000	124280000	117885000	502490000	470068000	478050000	3020000000	2940000000	3240000000	4710000000	4810000000	5030000000
AKH3	1	1	1	1	1	1	29800000	33100000	35100000	339000000	596000000	555000000
GPB5	3340000	4740000	3020000	4640000	10210000	10560000	1350000	1210000	1170000	14600000	11800000	8140000
FMRFa	18915200	17340000	16070000	50280000	44920000	47380000	1	1	1	1	1	1
DH46	16110000	11700000	12670000	28500000	24670000	28600000	47300000	67700000	92200000	215000000	252000000	187000000
Natalisin	44784000	43138000	44428000	102876000	98136000	101777000	521000	565000	495000	831000	710000	510000
PDF	56450000	58960000	59880000	39630000	52100000	45940000	1	1	1	1	1	1
Kinin	34830000	15296000	29520000	84090000	37230000	73930000	6840000	6790000	6470000	13900000	15000000	14500000
RYamide	142370000	191460000	144620000	450410000	498120000	368820000	239000	249000	146000	376000	265000	314000
NPF2	98500000	83400000	37000000	89800000	71800000	91200000	1	1	1	1	1	1
PVK-3	299000	314000	441000	152000	262000	433000	1	1	1	1	1	1
Pyrokinin2	611000	1820000	1670000	1870000	2820000	3430000	134000000	150000000	135000000	182000000	204000000	197000000
Corazonin	1	1	1	1	1	1	98050000	94465000	101196000	286492000	260726000	273607000
