# Supplementary material for: FUNCTIONALIZED POLYMERIC MEMBRANES FOR BIOSEPARATION AND BIOCATALYSIS
Source: eLife journal article supplement (doi:10.7554/elife.65279), 2007-01-01

**A**

|                                       |           |
|---------------------------------------|-----------|
| GGTGACGGCATGGTGCTGCTACCTGGTGGCATCACAG | WT (x12)  |
| GGTGACGGCATGGTGCTGCTACCTGGTGGCATCACAG | -4bp (x1) |
| GGTGACGGCATGGTGCTGCTACCTGGTGGCATCACAG | -7bp (x3) |
| GGTGACGGCATGGTGCTGCTACCTGGTGGCATCACAG | -10bp(x1) |
| GGTGACGGCATGGTGCTGCTACCTGGTGGCATCACAG | -13bp(x5) |
| GGTGACGGCATGGTGCTGCTACCTGGTGGCATCACAG | -21bp(x1) |

**B**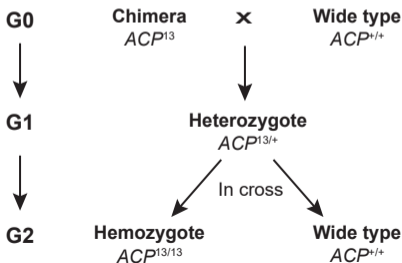

Supplement: supp [file elife-65279-supp-v1.zip › elife_poa_e65279_Figure_2_figure_supplement_1.pdf]
