# Supplementary material for: FUNCTIONALIZED POLYMERIC MEMBRANES FOR BIOSEPARATION AND BIOCATALYSIS
Source: eLife journal article supplement (doi:10.7554/elife.65279), 2007-01-01
Supplement: supp [file elife-65279-supp-v1.zip › elife_poa_e65279_Figure_2_source_data_1.xlsx]

## Sheet: Sheet1
Fig 2A										Fig 2G	female				male					Fig 2H	femlae				male					Fig 2I	female				male
tissues	male				female					WT 15 min	ACP-/- 15 min	WT 60min	ACP-/- 60 min		WT 15 min	ACP-/- 15 min	WT 60min	ACP-/- 60 min		WT 15 min	ACP-/- 15 min	WT 60min	ACP-/- 60 min		WT 15 min	ACP-/- 15 min	WT 60min	ACP-/- 60 min		WT 15 min	ACP-/- 15 min	WT 60min	ACP-/- 60 min		WT 15 min	ACP-/- 15 min	WT 60min	ACP-/- 60 min
Br	4.63294	5.54785	6.73617	6.07097	5.47147	3.14253	7.21965	5.86418		0.0398	0.163251	0.18152	0.06684		0.18939	0.1939	0.15482	0.06171		0.009804	0.202826	0.71908	0.274644		0.509692	0.131193	0.842952	0.480287		4.31779	2.16347	2.20127	2.25608		2.24535	2.76084	2.85872	3.07729
Tg	0.0372124	0.0412898	0.0427459	0.0604518	0.03545	0.0103224	0.0235509	0.0229069		0.07711	0.04798	0.35367	0.31131		0.29421	0.21734	0.28407	0.09415		0.021114	0.39829	1.18451	0.92212		0.758506	0.549653	0.580566	0.128177		3.56553	2.95811	3.64552	3.75889		2.57299	2.16216	2.94352	2.42121
RC	0.00667012	0.00452436	0.00541782	0.00362433	0.00199683	0.00468391	0.00572673	0.00234195		0.108263	0.123	0.20631	0.15488		0.2298	0.1701	0.48042	0.13742		0.85006	0.48256	0.500644	0.209607		1.04125	0.230719	0.192265	0.342308		2.77559	2.73661	2.96023	3.06695		4.47533	3.12271	3.06324	2.61716
FB	0.00026041	0.000163669	0.000222035	0.000300171	9.23884e-05	0.000124469	0.00021822	0.000391981		0.027517	0.198403	0.30057	0.2396		0.16002	0.04251	0.06606	0.14434		0.10631	0.312885	1.43522	0.64823		0.745688	0.229965	0.489334	0.8897		3.68787	4.64682	4.06378	4.30487		4.57987	2.20609	2.39686	1.83649
MS	0.00109343	0.000542937	0.00507658	0.000590028	0.00132763	0.000369554	0.000619363	0.000405804		0.0312	0.1623	0.13416	0.19911		0.21457	0.21085	0.16353	0.14156		0.058024	0.79922	0.1556	0.514131		1.06764	0.737395	0.315165	0.285759		2.93025	2.57294	2.38289	2.49527		2.31378	3.07278	2.79867	2.65247
Ov/Ts	4.2803e-05	4.88281e-05	5.07255e-05	0.000198039	0.000285954	0.000567958	0.000252413	0.000757258		0.114999	0.0685	0.77182	0.50348		0.1555	0.2757	0.21884	0.12993		0.306874	0.2036	2.03047	1.41656		0.037699	0.429016	0.49989	0.371713		2.99451	4.31497	3.8382	4.02839		2.60009	4.34112	2.42995	3.84738
										0.144559	0.10716	0.20847	0.28141		0.1245	0.05229	0.17861	0.05076		0.395096	0.27898	1.30967	0.839936		0.034683	0.861352	0.69668	0.367943		2.37599	2.89639	4.56344	4.6218		2.75626	2.78291	2.67214	3.64088
										0.146615	0.1045	0.14158	0.13217		0.10131	0.02164	0.38025	0.18586		0.545126	0.87452	0.670205	0.342503		0.260878	0.26314	0.645409	0.980931		2.48729	2.22649	2.68937	2.72682		2.4587	3.7421	3.77305	3.49632
Fig 2B										0.074239	0.2302	0.3778	0.0778		0.05819	0.04898	0.1794	0.31612		0.334017	0.08295	0.772188	0.448814		0.165122	0.611115	1.38183	0.536835		3.37088	3.46561	3.46948	3.46948		2.29343	2.12433	3.50093	2.2754
0 min	15 min	30 min	60 min							0.081	0.067253	0.40615	0.27235		0.06361	0.0401	0.69301	0.2369		0.02413	0.21712	2.92891	0.724577		0.159844	0.410556	0.891207	1.08573		2.98238	3.49722	3.2413	3.3941		2.54092	4.5042	3.43367	3.91056
8.362	8.7355	10.0745	21.5594							0.053905	0.13782	0.36718	0.27306		0.14305	0.15952	0.27271	0.128263		0.426757	0.32422	1.08423	0.833904		0.971883	0.226754	0.75172	0.68537		2.96402	2.4501	3.77422	3.96513		5.23531	2.1391	3.17949	3.38802
6.5607	6.4607	9.2685	18.0009							0.13457	0.0503	0.27729	0.19507		0.09784	0.047	0.30359	0.23751		1.25086	0.1207	0.659734	0.565487		0.260124	0.14326	0.663504	0.045239		3.07357	3.33065	3.38529	3.37044		2.61061	3.60422	3.58863	2.23119
10.9848	7.8241	12.5808	29.8571							0.039661	0.124609	0.3536	0.04536		0.06505	0.181	0.18455	0.25784		0.078414	0.444094	1.25915	1.14599		0.161352	0.06032	2.44667	0.788665		4.2243	2.99117	3.2411	3.2411		1.90089	2.66626	3.48495	3.43889
7.5308	9.2156	11.2904	19.6706							0.334767	0.111617	0.26036	0.26036		0.08816	0.04822	0.71088	0.115		1.32927	0.296308	0.791681	0.568503		0.279727	0.267664	0.756244	0.134963		2.00764	3.11532	3.02334	3.02334		2.79664	2.17272	3.43327	2.23572
										0.07026	0.13726	0.3972	0.1972		0.18703	0.0653	0.32832	0.074		0.22168	0.54059	0.824857	0.725331		1.54189	0.602432	1.51528	0.24806		2.76079	4.09871	4.15226	4.15226		4.55877	3.64621	2.26434	3.02371
										0.155219	0.033131	0.30454	0.24628		0.02664	0.1001	0.44629	0.1535		0.469749	0.7541	0.264013	0.598382		0.084446	0.28651	1.29006	0.453897		2.48438	2.48807	2.62436	2.58083		2.81137	3.6571	3.88605	4.29303
										0.25549	0.17261	0.41746	0.08343		0.12623	0.1063	0.39746	0.1208		1.29535	0.69354	0.822425	0.422425		0.585844	0.266156	1.12365	0.282743		3.86306	2.39489	2.38147	2.39489		4.60525	2.38324	3.22301	2.66515
										0.146126	0.055083	0.11288	0.10462		0.15979	0.11343	0.04928	0.31553		0.35891	0.150804	1.34759	0.347586		0.533065	0.413936	0.568503	1.45142		2.03119	3.18543	3.1928	3.18543		3.25582	3.28289	2.12669	4.95359
										0.067419	0.09479	0.54343	0.08832		0.0019	0.2084	0.19875	0.3124		0.180202	0.28658	2.26088	0.260878		0.06032	0.158336	1.57959	0.7389		2.57837	2.82573	2.90175	2.82573		2.58733	4.08285	2.72003	2.53093
										0.17312	0.108165	0.08215	0.21974		0.08442	0.0999	0.31553	0.2464		1.05331	0.32196	0.624297	0.624297		0.558701	0.63335	1.29481	0.9651		2.71276	2.82049	2.95286	2.82049		4.21589	2.58495	4.95359	3.60511
										0.18099	0.1932	0.12682			0.04328	0.1461	0.10592	0.14867		0.468223	0.07012	0.51874			0.126669	1.19377	2.40445	0.822595		3.70156	3.1274	2.37812			2.75952	3.08375	2.47721	2.54361
										0.1122	0.050296	0.32684			0.05387	0.0617				0.591876	0.73414	1.17643			0.118375	1.23223				3.8043	2.6421	3.18023			2.07146	2.05298
										0.1247	0.12738				0.0985	0.13822				0.34683	0.11048				0.055795	0.594138				4.40997	2.7943				3.22474	2.12197
															0.0726	0.12139									0.034683	0.43731									2.18094	3.52798
