# Supplementary material for: FUNCTIONALIZED POLYMERIC MEMBRANES FOR BIOSEPARATION AND BIOCATALYSIS
Source: eLife journal article supplement (doi:10.7554/elife.65279), 2007-01-01
Supplement: supp [file elife-65279-supp-v1.zip › elife_poa_e65279_Figure_3_source_data_1.xlsx]

## Sheet: Sheet1
Figure 3B
	male				female
Br	0.0001365	0.00011035	9.39317e-05	0.00014866	0.000196133	0.000197236	0.000151544	0.000238413
Tg	0.000134693	6.4157e-05	6.04862e-05	9.72442e-05	6.11183e-05	6.32737e-05	6.85238e-05	8.43625e-05
RC	2.32399e-05	1.96103e-05	3.86805e-05	1.81706e-05	6.11183e-05	7.52455e-05	6.924e-05	0.000131465
FB	0.00035884	0.000210471	0.000314252	0.00020703	0.000749369	0.000629835	0.000503373	0.000515201
MS	0.000355139	0.00021088	0.000361239	0.000257259	0.000750449	0.00064154	0.000572534	0.000858743
Ov/TA	3.1465e-05	3.89865e-05	3.11866e-05	4.06045e-05	3.94471e-05	3.462e-05	5.10393e-05	2.89108e-05
Figure 3E										Figure 3F
female					male					female					male
WT 15 min	ACP-/- 15 min	WT 60min	ACP-/- 60 min		WT 15 min	ACP-/- 15 min	WT 60min	ACP-/- 60 min		WT 15 min	ACP-/- 15 min	WT 60min	ACP-/- 60 min		WT 15 min	ACP-/- 15 min	WT 60min	ACP-/- 60 min
0.14116	0.06653	0.444225	0.12927		0.05629	0.123165	0.069295	0.28915		0.778487	0.232227	2.06817	0.432786		0.211492	0.570765	0.246929	2.08137
0.135045	0.09333	0.47162	0.100705		0.01314	0.05722	0.052595	0.060205		0.558324	0.196413	2.06554	0.208476		0.043354	0.197921	0.162106	0.213377
0.12354	0.03624	0.476205	0.04919		0.03922	0.074635	0.08922	0.148455		0.639	0.082184	2.08665	0.102165		0.160221	0.287267	0.313614	0.560209
0.0082	0.041785	0.038025	0.107445		0.06913	0.03648	0.07742	0.11478		0.023374	0.109328	0.113098	0.307625		0.386039	0.084069	0.413559	0.2556
0.024815	0.09158	0.08164	0.120405		0.127345	0.06966	0.525545	0.09415		0.089724	0.300462	0.266156	0.381892		0.289797	0.321574	3.00764	0.403381
0.127045	0.039705	0.50252	0.104725		0.03598	0.10106	0.1386	0.13243		0.488204	0.122145	1.8548	0.316296		0.131947	0.316296	0.458044	0.41846
0.131185	0.015845	0.459675	0.015845		0.121395	0.128995	0.50736	0.350575		0.62769	0.041846	1.90003	0.0426		0.328285	0.624675	2.01238	0.586269
0.001335	0.05493	0.00294	0.08059		0.04841	0.13135	0.062415	0.199245		0.012064	0.100657	0.036191	0.175678		0.180579	0.496121	0.219786	1.61088
0.133915	0.13158	0.52674	0.198735		0.12426	0.02999	0.50206	0.033715		0.787158	0.354372	2.44479	0.517986		0.510823	0.153059	1.7515	0.166253
0.12961	0.06788	0.52256	0.078115		0.11972	0.001425	0.250215	0.006425		0.579813	0.273696	2.02746	0.323459		0.605448	0.008671	1.2124	0.017719
0.09153	0.0223	0.318435	0.025095		0.011165	0.05557	0.032535	0.14769		0.371336	0.051271	1.26933	0.07276		0.034683	0.220163	0.097641	0.534197
0.139595	0.01936	0.13986	0.139425		0.106395	0.05023	0.108175	0.05023		0.601678	0.082561	0.602809	0.57265		0.511577	0.17794	0.516478	0.205083
0.13455	0.122475	0.45952	0.175775		0.006075	0.03626	0.011695	0.036435		0.599793	0.335145	1.84009	0.473124		0.028275	0.174924	0.066351	0.182464
0.106665	0.09358	0.19756	0.166965		0.08674	0.107175	0.2385	0.268245		0.604694	0.362666	0.996765	0.648802		0.507807	0.376991	1.3534	1.00204
0.020965	0.11849	0.020965	0.32202		0.043845	0.0343	0.12266	0.051815		0.058057	0.385285	0.058057	1.05369		0.136848	0.12403	0.387924	0.175301
0.12198	0.065655	0.49636	0.10271		0.10298	0.121	0.10298	0.132315		0.422607	0.267287	1.31683	0.401119		0.526657	0.492728	0.526657	0.532312
0.108995	0.0483	0.48476	0.0483		0.123375	0.080955	0.51336	0.0831		0.570011	0.140995	2.17599	0.14288		0.7242	0.309133	2.92998	0.333637
0.055755	0.04657	0.05778	0.098915		0.08246	0.02747	0.10476	0.0339		0.272188	0.256354	0.277843	0.430147		0.410544	0.094625	0.488581	0.118752
0.100315	0.13302	0.116665	0.427015		0.12548	0.061105	0.181775	0.084245		0.440326	0.466715	0.498006	1.61692		0.580944	0.214885	0.815055	0.282367
0.00433	0.051755	0.238825	0.101295		0.117505	0.083215	0.28521	0.135025		0.029406	0.162483	0.903271	0.319312		0.418083	0.284629	0.964721	0.480664
0.014505	0.13639	0.022965	0.27643		0.046745	0.11564	0.046745	0.107005		0.053533	0.447112	0.082184	0.895731		0.204706	0.527411	0.204706	1.17584
0.1248	0.12486	0.49605	0.371175		0.021875	0.05638	0.02969	0.08733		0.652195	0.313657	2.39993	0.740788		0.064089	0.259747	0.085954	0.376614
0.01529	0.10848	0.250255	0.138365		0.03209	0.088945	0.0709	0.216515		0.080299	0.427508	1.56941	0.556816		0.124784	0.419214	0.124784	0.942101
0.117455	0.01046	0.15646	0.023095		0.09151	0.0325	0.131705	0.040785		0.576797	0.03016	0.729478	0.066728		0.469731	0.14665	0.606579	0.1704
0.08249	0.11608	0.203345	0.35834		0.11038	0.065955	0.406195	0.111425		0.385662	0.589991	0.98734	1.66894		0.513462	0.145896	1.87063	0.248437
0.07108	0.12755	0.24021	0.21635		0.037335	0.05234	0.131695	0.12827		0.205083	0.658227	0.669536	0.934938		0.134963	0.17417	0.419968	0.374729
0.01637	0.131815	0.028625	0.41793		0.122755	0.00369	0.33107	0.00564		0.050894	0.499136	0.085577	1.27272		0.64654	0.010556	1.51211	0.016965
0.101965	0.120505	0.481515	0.38836		0.046745	0.027565	0.07851	0.047765		0.281236	0.44862	1.43747	1.18865		0.239767	0.101034	0.408	0.172285
0.006965	0.12798	0.008045	0.21782		0.112345	0.047	0.34306	0.149805		0.022997	0.345701	0.025636	0.53005		0.544752	0.165499	1.44388	0.50743
0.11184	0.04755	0.150435	0.10769		0.103055	0.057055	0.1497	0.10321		0.539852	0.164368	0.711382	0.376237		0.527034	0.186234	0.612611	0.292545
0.00187		0.004875			0.12962	0.018645	0.32544	0.05978		0.00754		0.020358			0.252098	0.055041	1.74283	0.190381
0.03086		0.263985			0.05431	0.109505	0.09668	0.14885		0.093494		0.630706			0.197167	0.515724	0.330621	0.642016
						0.08876		0.39702								0.38717		0.50231
