# Supplementary material for: FUNCTIONALIZED POLYMERIC MEMBRANES FOR BIOSEPARATION AND BIOCATALYSIS
Source: eLife journal article supplement (doi:10.7554/elife.65279), 2007-01-01
Supplement: supp [file elife-65279-supp-v1.zip › elife_poa_e65279_Figure_4_source_data_1.xlsx]

## Sheet: source data for RNA-seq
GeneID	WT-MS-1	WT-MS-2	WT-MS-3	ACP-MS-1	ACP-MS-2	ACP-MS-3	FunctionDescription	Symbol	NR	Swissprot	Temble	COG	GO	IPR	KEGG
LOCMI00001	1.14145	1.05233	1.5017	0.815694	0.908601	0	Adenosine deaminase-like protein	adal	Adenosine deaminase-like protein [Zootermopsis nevadensis]	Adenosine deaminase-like protein OS=Danio rerio GN=adal PE=2 SV=1	Uncharacterized protein OS=Apis mellifera GN=LOC100578486 PE=4 SV=1	COG1816|Adenosine deaminase|F|Nucleotide transport and metabolism ;	GO:0009168; purine ribonucleoside monophosphate biosynthetic process; Biological Process GO:0019239; deaminase activity; Molecular Function	IPR001365; Adenosine/AMP deaminase domain	K01488 add, ADA; adenosine deaminase [EC:3.5.4.4] [EC:3.5.4.4] Metabolism; Nucleotide metabolism; Purine metabolism [PATH:ko00230] Human Diseases; Immune diseases; Primary immunodeficiency [PATH:ko05340]
LOCMI00003	0.190242	0	0	0	0	0	Gustatory receptor for sugar taste 64f	Gr64f	gustatory receptor candidate 2 [Tribolium castaneum]	Gustatory receptor for sugar taste 64f OS=Drosophila melanogaster GN=Gr64f PE=2 SV=2	Gustatory receptor candidate 2 (Fragment) OS=Tribolium castaneum GN=gr2 PE=4 SV=2	NA	GO:0003676; nucleic acid binding; Molecular Function GO:0008527; taste receptor activity; Molecular Function GO:0016021; integral component of membrane; Cellular Component GO:0050912; detection of chemical stimulus involved in sensory perception of taste; Biological Process	IPR009318; Gustatory receptor IPR012337; Ribonuclease H-like domain	NA
LOCMI00005	1.8073	8.41863	1.12627	0.582638	2.15793	2.46298	LOCMI00005	LOCMI00005	LOCMI00005	LOCMI00005	LOCMI00005	LOCMI00005	LOCMI00005	LOCMI00005	LOCMI00005
LOCMI00006	0	0	1.5017	0.466111	0	0	LOCMI00006	LOCMI00006	LOCMI00006	LOCMI00006	LOCMI00006	LOCMI00006	LOCMI00006	LOCMI00006	LOCMI00006
LOCMI00008	1.23658	0.601331	2.62797	2.44708	0	2.24881	LOCMI00008	LOCMI00008	LOCMI00008	LOCMI00008	LOCMI00008	LOCMI00008	LOCMI00008	LOCMI00008	LOCMI00008
LOCMI00009	10.2731	16.9876	15.2673	6.52555	7.49595	10.0661	Beta-1,3-glucan-binding protein 1	glucan-binding	Beta-1,3-glucan-binding protein 1 [Zootermopsis nevadensis]	Beta-1,3-glucan-binding protein 1 OS=Manduca sexta PE=1 SV=1	Putative uncharacterized protein OS=Daphnia pulex GN=DAPPUDRAFT_332783 PE=4 SV=1	NA	NA	IPR008985; Concanavalin A-like lectin/glucanases superfamily	NA
LOCMI00011	0.380485	0	0	0	0	0	LOCMI00011	LOCMI00011	LOCMI00011	LOCMI00011	LOCMI00011	LOCMI00011	LOCMI00011	LOCMI00011	LOCMI00011
LOCMI00012	0.570727	0	0.75085	0.699166	0	0	LOCMI00012	LOCMI00012	LOCMI00012	LOCMI00012	LOCMI00012	LOCMI00012	LOCMI00012	LOCMI00012	LOCMI00012
LOCMI00013	0	0	2.50283	0	0.340725	0	Dolichyl-diphosphooligosaccharide--protein glycosyltransferase subunit STT3A	STT3A	oligosaccharyl transferase STT3, family GT66 [Chondrus crispus] emb|CDF39022.1| oligosaccharyl transferase STT3, family GT66 [Chondrus crispus]	Dolichyl-diphosphooligosaccharide--protein glycosyltransferase subunit STT3A OS=Pongo abelii GN=STT3A PE=2 SV=1	Oligosaccharyl transferase STT3, family GT66 OS=Chondrus crispus GN=CHC_T00009034001 PE=4 SV=1	COG1287|Uncharacterized membrane protein, required for N-linked glycosylation|R|General function prediction only ;	NA	NA	NA
LOCMI00014	0	0	0	0	0	0	LOCMI00014	LOCMI00014	LOCMI00014	LOCMI00014	LOCMI00014	LOCMI00014	LOCMI00014	LOCMI00014	LOCMI00014
LOCMI00015	108.438	102.226	65.9496	96.6014	102.331	76.2453	LOCMI00015	LOCMI00015	LOCMI00015	LOCMI00015	LOCMI00015	LOCMI00015	LOCMI00015	LOCMI00015	LOCMI00015
LOCMI00016	610.107	967.692	815.047	696.02	856.356	724.544	Protein import receptor MAS20-related Protein import receptor MAS20, metazoan	Protein import receptor	NA	NA	NA	NA	GO:0005742; mitochondrial outer membrane translocase complex; Cellular Component GO:0006605; protein targeting; Biological Process GO:0006886; intracellular protein transport; Biological Process	IPR002056; Protein import receptor MAS20-related IPR022422; Protein import receptor MAS20, metazoan	NA
LOCMI00017	0	0	0	0	0	0	LOCMI00017	LOCMI00017	LOCMI00017	LOCMI00017	LOCMI00017	LOCMI00017	LOCMI00017	LOCMI00017	LOCMI00017
LOCMI00018	0	0	0	0	0	0	Methylthioribose-1-phosphate isomerase	mtnA	methylthioribose-1-phosphate isomerase [Dickeya zeae]	Methylthioribose-1-phosphate isomerase OS=Cronobacter sakazakii (strain ATCC BAA-894) GN=mtnA PE=3 SV=1	Methylthioribose-1-phosphate isomerase OS=Alishewanella agri BL06 GN=mtnA PE=3 SV=1	NA	NA	NA	NA
LOCMI00019	4.56582	4.35965	6.38222	1.74791	1.70363	3.96218	LOCMI00019	LOCMI00019	LOCMI00019	LOCMI00019	LOCMI00019	LOCMI00019	LOCMI00019	LOCMI00019	LOCMI00019
LOCMI00020	1.42682	0.450998	0.375425	0	1.70363	0.321258	LOCMI00020	LOCMI00020	LOCMI00020	LOCMI00020	LOCMI00020	LOCMI00020	LOCMI00020	LOCMI00020	LOCMI00020
LOCMI00021	31.6753	35.0275	35.6654	28.3162	43.7264	28.8061	Soluble calcium-activated nucleotidase 1	CANT1	Soluble calcium-activated nucleotidase 1 [Zootermopsis nevadensis]	Soluble calcium-activated nucleotidase 1 OS=Homo sapiens GN=CANT1 PE=1 SV=1	CG5276 protein OS=Drosophila melanogaster GN=CG5276 PE=4 SV=1	NA	GO:0005509; calcium ion binding; Molecular Function GO:0016462; pyrophosphatase activity; Molecular Function	IPR009283; Apyrase	K12304 CANT1; soluble calcium-activated nucleotidase 1 [EC:3.6.1.6] [EC:3.6.1.6] Metabolism; Nucleotide metabolism; Purine metabolism [PATH:ko00230] Metabolism; Nucleotide metabolism; Pyrimidine metabolism [PATH:ko00240]
LOCMI00022	32.4363	35.1779	43.6744	15.2651	5.9059	13.1716	LOCMI00022	LOCMI00022	LOCMI00022	LOCMI00022	LOCMI00022	LOCMI00022	LOCMI00022	LOCMI00022	LOCMI00022
LOCMI00023	0.380485	0	0	0	0	0	LOCMI00023	LOCMI00023	LOCMI00023	LOCMI00023	LOCMI00023	LOCMI00023	LOCMI00023	LOCMI00023	LOCMI00023
LOCMI00024	0	0	1.12627	0	0	0	Adenylate kinase	Adk2	adenylate kinase isoenzyme 2 [Capsaspora owczarzaki ATCC 30864] gb|EFW42666.1| adenylate kinase isoenzyme 2 [Capsaspora owczarzaki ATCC 30864]	Adenylate kinase OS=Aedes aegypti GN=Adk2 PE=2 SV=1	Adenylate kinase isoenzyme 2 OS=Capsaspora owczarzaki (strain ATCC 30864) GN=CAOG_07798 PE=3 SV=1	COG0563|Adenylate kinase and related kinases|F|Nucleotide transport and metabolism ;	GO:0005524; ATP binding; Molecular Function GO:0006139; nucleobase-containing compound metabolic process; Biological Process GO:0019205; nucleobase-containing compound kinase activity; Molecular Function	IPR000850; Adenylate kinase/UMP-CMP kinase IPR027417; P-loop containing nucleoside triphosphate hydrolase	NA
LOCMI00025	2.66339	3.45765	2.37769	8.73957	1.59005	2.46298	LOCMI00025	LOCMI00025	LOCMI00025	LOCMI00025	LOCMI00025	LOCMI00025	LOCMI00025	LOCMI00025	LOCMI00025
LOCMI00027	840.015	1293.91	1057.2	948.419	1208.67	908.946	LOCMI00027	LOCMI00027	LOCMI00027	LOCMI00027	LOCMI00027	LOCMI00027	LOCMI00027	LOCMI00027	LOCMI00027
LOCMI00028	16.5511	0	0	0.699166	16.2412	2.03463	LOCMI00028	LOCMI00028	LOCMI00028	LOCMI00028	LOCMI00028	LOCMI00028	LOCMI00028	LOCMI00028	LOCMI00028
LOCMI00029	0.570727	0	0	0	0	0.321258	LOCMI00029	LOCMI00029	LOCMI00029	LOCMI00029	LOCMI00029	LOCMI00029	LOCMI00029	LOCMI00029	LOCMI00029
LOCMI00030	0	0	0.75085	0	0	0.642516	ABC transporter F family member 4	ABCF4	P-loop containing nucleoside triphosphate hydrolase protein [Coccomyxa subellipsoidea C-169] gb|EIE25084.1| P-loop containing nucleoside triphosphate hydrolase protein [Coccomyxa subellipsoidea C-169]	ABC transporter F family member 4 OS=Arabidopsis thaliana GN=ABCF4 PE=2 SV=1	P-loop containing nucleoside triphosphate hydrolase protein OS=Coccomyxa subellipsoidea C-169 GN=COCSUDRAFT_13704 PE=3 SV=1	COG0488|ATPase components of ABC transporters with duplicated ATPase domains|R|General function prediction only ;	NA	IPR027417; P-loop containing nucleoside triphosphate hydrolase	NA
LOCMI00031	0	0	0.500566	0	0	0	RP-L23, MRPL23, rplW large subunit ribosomal protein L23	rpl23a	hypothetical protein GALMADRAFT_245590 [Galerina marginata CBS 339.88]	60S ribosomal protein L25 OS=Puccinia graminis PE=2 SV=2	Ribosomal protein rpl23a OS=Coprinopsis cinerea (strain Okayama-7 / 130 / ATCC MYA-4618 / FGSC 9003) GN=CC1G_12270 PE=3 SV=2	COG0089|Ribosomal protein L23|J|Translation, ribosomal structure and biogenesis ;	GO:0000166; nucleotide binding; Molecular Function GO:0003735; structural constituent of ribosome; Molecular Function GO:0005622; intracellular; Cellular Component GO:0005840; ribosome; Cellular Component GO:0006412; translation; Biological Process	IPR001014; Ribosomal protein L23/L25, conserved site IPR012677; Nucleotide-binding, alpha-beta plait IPR012678; Ribosomal protein L23/L15e core domain IPR013025; Ribosomal protein L25/L23 IPR019985; Ribosomal protein L23	K02892 RP-L23, MRPL23, rplW; large subunit ribosomal protein L23 K02892 Genetic Information Processing; Translation; Ribosome [PATH:ko03010]
LOCMI00034	0	0	0	0	0	0	NA	LOCMI00034	PREDICTED: uncharacterized protein LOC102673380 isoform X2 [Apis dorsata]	NA	Uncharacterized protein OS=Strigamia maritima PE=4 SV=1	NA	NA	NA	NA
LOCMI00035	0	0.450998	0	0	0	0.749602	LOCMI00035	LOCMI00035	LOCMI00035	LOCMI00035	LOCMI00035	LOCMI00035	LOCMI00035	LOCMI00035	LOCMI00035
LOCMI00036	4.18533	2.10466	0	0.815694	0.340725	0.749602	Unconventional myosin-Ie	Myo1e	Myosin-Ie, partial [Zootermopsis nevadensis]	Unconventional myosin-Ie OS=Mus musculus GN=Myo1e PE=1 SV=1	Myosin-Ie OS=Harpegnathos saltator GN=EAI_12922 PE=4 SV=1	COG5022|Myosin heavy chain|Z|Cytoskeleton ;	GO:0003774; motor activity; Molecular Function GO:0016459; myosin complex; Cellular Component	IPR010926; Myosin tail 2	NA
LOCMI00039	210.788	265.488	210.738	150.204	152.645	145.744	28S ribosomal protein S33, mitochondrial	MRPS33	hypothetical protein L798_09895 [Zootermopsis nevadensis]	28S ribosomal protein S33, mitochondrial OS=Bos taurus GN=MRPS33 PE=1 SV=2	Putative mitochondrial 28s ribosomal protein OS=Anopheles aquasalis PE=4 SV=1	NA	NA	IPR013219; Ribosomal protein S27/S33, mitochondrial	K17411
LOCMI00040	0	0	1.75198	20.7419	1.02218	2.99841	LOCMI00040	LOCMI00040	LOCMI00040	LOCMI00040	LOCMI00040	LOCMI00040	LOCMI00040	LOCMI00040	LOCMI00040
LOCMI00041	5.51703	7.06564	6.75765	6.29249	8.40456	6.21099	COMM domain-containing protein 4	COMMD4	COMM domain-containing protein 4 [Zootermopsis nevadensis]	COMM domain-containing protein 4 OS=Bos taurus GN=COMMD4 PE=2 SV=2	COMM domain-containing protein, putative (Fragment) OS=Pediculus humanus subsp. corporis GN=Phum_PHUM624480 PE=4 SV=1	NA	NA	IPR009886; HCaRG	NA
LOCMI00042	6.7536	5.56231	6.88279	4.42805	5.22445	8.35271	Rho-related BTB domain-containing protein 1	RHOBTB1	Rho-related BTB domain-containing protein 2, partial [Zootermopsis nevadensis]	Rho-related BTB domain-containing protein 1 OS=Homo sapiens GN=RHOBTB1 PE=1 SV=2	Uncharacterized protein OS=Apis mellifera GN=RhoBTB PE=4 SV=1	COG1100|GTPase SAR1 and related small G proteins|R|General function prediction only ;	GO:0003924; GTPase activity; Molecular Function GO:0005515; protein binding; Molecular Function GO:0005525; GTP binding; Molecular Function GO:0005622; intracellular; Cellular Component GO:0006184; GTP catabolic process; Biological Process GO:0007165; signal transduction; Biological Process GO:0007264; small GTPase mediated signal transduction; Biological Process GO:0015031; protein transport; Bi…	IPR000210; BTB/POZ-like IPR001806; Small GTPase superfamily IPR003578; Small GTPase superfamily, Rho type IPR003579; Small GTPase superfamily, Rab type IPR011333; BTB/POZ fold IPR013069; BTB/POZ IPR020849; Small GTPase superfamily, Ras type IPR027417; P-loop containing nucleoside triphosphate hydrolase	K07868 RHOBTB1_2; Rho-related BTB domain-containing protein 1/2 K07868 Genetic Information Processing; Folding, sorting and degradation; SNAREs [BR:ko04131] Genetic Information Processing; Folding, sorting and degradation; Ubiquitin mediated proteolysis [PATH:ko04120]
LOCMI00043	0.380485	0	0	0	0	0	cellular retinoic acid binding protein	FABP	cellular retinoic acid binding protein [Antheraea yamamai]	Fatty acid-binding protein OS=Lepidoglyphus destructor PE=1 SV=1	Cellular retinoic acid binding protein OS=Antheraea yamamai PE=2 SV=1	NA	NA	IPR000566; Lipocalin/cytosolic fatty-acid binding domain IPR011038; Calycin-like IPR012674; Calycin	NA
LOCMI00044	18.6437	17.4386	17.645	22.3733	16.9227	15.9558	T-complex protein 1 subunit alpha	TCP1	T-complex protein subunit alpha [Locusta migratoria]	T-complex protein 1 subunit alpha OS=Homo sapiens GN=TCP1 PE=1 SV=1	T-complex protein 1 subunit alpha OS=Locusta migratoria GN=tcp1-alpha PE=3 SV=1	COG0459|Chaperonin GroEL (HSP60 family)|O|Posttranslational modification, protein turnover, chaperones ;	GO:0005524; ATP binding; Molecular Function GO:0006457; protein folding; Biological Process GO:0044267; cellular protein metabolic process; Biological Process GO:0051082; unfolded protein binding; Molecular Function	IPR002423; Chaperonin Cpn60/TCP-1 IPR012715; T-complex protein 1, alpha subunit IPR027409; GroEL-like apical domain	NA
LOCMI00046	0	0.450998	0	0	0.68145	0.321258	Neurexin-4	Nrx-IV	PREDICTED: neurexin-4 isoform X6 [Apis mellifera]	Neurexin-4 OS=Drosophila melanogaster GN=Nrx-IV PE=1 SV=2	Uncharacterized protein OS=Apis mellifera GN=CTL8 PE=4 SV=1	NA	GO:0007155; cell adhesion; Biological Process	IPR000421; Coagulation factor 5/8 C-terminal type domain IPR008979; Galactose-binding domain-like	NA
LOCMI00049	0	0	0	0	0	0	General substrate transporter Major facilitator superfamily domain, general substrate transporter Major facilitator superfamily domain	LOCMI00049	NA	NA	NA	NA	GO:0016021; integral component of membrane; Cellular Component GO:0022857; transmembrane transporter activity; Molecular Function GO:0055085; transmembrane transport; Biological Process	IPR005828; General substrate transporter IPR016196; Major facilitator superfamily domain, general substrate transporter IPR020846; Major facilitator superfamily domain	NA
LOCMI00052	0	0	0	0	1.24933	0.428344	unknown secreted protein	LOCMI00052	unknown secreted protein [Papilio polytes]	NA	Uncharacterized protein OS=Papilio polytes PE=2 SV=1	NA	GO:0005515; protein binding; Molecular Function	IPR002350; Kazal domain	NA
LOCMI00053	13.5072	13.2293	12.8896	12.585	14.8783	8.24563	Alpha-aspartyl dipeptidase	aad-a	PREDICTED: alpha-aspartyl dipeptidase-like [Poecilia formosa]	Alpha-aspartyl dipeptidase OS=Xenopus laevis GN=aad-a PE=1 SV=1	Uncharacterized protein OS=Xiphophorus maculatus PE=4 SV=1	COG3340|Peptidase E|E|Amino acid transport and metabolism ;	GO:0006508; proteolysis; Biological Process GO:0008236; serine-type peptidase activity; Molecular Function	IPR005320; Peptidase S51	K05995
LOCMI00054	0.760969	0	0	0	0	0	endothelin-converting enzyme, putative	ECE1	endothelin-converting enzyme, putative [Pediculus humanus corporis] gb|EEB19488.1| endothelin-converting enzyme, putative [Pediculus humanus corporis]	NA	Endothelin-converting enzyme, putative OS=Pediculus humanus subsp. corporis GN=Phum_PHUM577400 PE=4 SV=1	NA	GO:0006508; proteolysis; Biological Process	IPR008753; Peptidase M13, N-terminal domain	NA
LOCMI00055	37.4777	35.4785	20.3981	20.3923	20.7842	32.6612	1-acylglycerol-3-phosphate O-acyltransferase ABHD5	ABHD5	Abhydrolase domain-containing protein 4 [Harpegnathos saltator]	1-acylglycerol-3-phosphate O-acyltransferase ABHD5 OS=Sus scrofa GN=ABHD5 PE=2 SV=1	Abhydrolase domain-containing protein 4 OS=Harpegnathos saltator GN=EAI_03989 PE=4 SV=1	NA	NA	NA	NA
LOCMI00056	11.4145	11.4253	20.1478	18.2948	12.7204	12.8503	LOCMI00056	LOCMI00056	LOCMI00056	LOCMI00056	LOCMI00056	LOCMI00056	LOCMI00056	LOCMI00056	LOCMI00056
LOCMI00057	14.8389	17.4386	63.9474	13.1676	48.6101	18.633	Ejaculatory bulb-specific protein 3	CSP	hypothetical protein [Locusta migratoria]	Ejaculatory bulb-specific protein 3 OS=Drosophila melanogaster GN=PebIII PE=1 SV=2	Putative uncharacterized protein (Fragment) OS=Locusta migratoria PE=2 SV=1	NA	NA	IPR005055; Insect odorant-binding protein A10/Ejaculatory bulb-specific protein 3	NA
LOCMI00058	98.165	130.639	81.7175	53.4862	72.688	62.217	BolA-like protein 3	BOLA3	BolA-like protein 3 [Zootermopsis nevadensis]	BolA-like protein 3 OS=Homo sapiens GN=BOLA3 PE=1 SV=1	Uncharacterized protein OS=Apis mellifera GN=LOC727306 PE=3 SV=1	COG0271|Stress-induced morphogen (activity unknown)|T|Signal transduction mechanisms ;	NA	IPR002634; BolA protein	NA
LOCMI00059	0	0.601331	5.50623	95.2031	10.7896	10.1732	achelase-2	Achelase	achelase-2 [Anopheles darlingi]	NA	Achelase-2 OS=Anopheles darlingi GN=AND_000463 PE=4 SV=1	NA	NA	IPR000859; CUB domain	NA
LOCMI00060	0.665848	0	0	0	0.795025	0.428344	Protein G12	Allergen	major allergen Bla g 1.0101 [Blattella germanica]	Protein G12 OS=Anopheles gambiae GN=AGAP006187 PE=2 SV=2	Major allergen Bla g 1.0101 (Fragment) OS=Blattella germanica PE=1 SV=1	NA	NA	IPR010629; Insect allergen-related	NA
LOCMI00063	37.2875	49.4595	42.9236	31.3459	26.3494	24.4156	UTP--glucose-1-phosphate uridylyltransferase	UGP2	UTP--glucose-1-phosphate uridylyltransferase [Zootermopsis nevadensis]	UTP--glucose-1-phosphate uridylyltransferase OS=Bos taurus GN=UGP2 PE=1 SV=2	Uncharacterized protein (Fragment) OS=Bombyx mori PE=4 SV=1	COG4284|UDP-glucose pyrophosphorylase|G|Carbohydrate transport and metabolism ;	GO:0008152; metabolic process; Biological Process GO:0016779; nucleotidyltransferase activity; Molecular Function	IPR002618; UTP--glucose-1-phosphate uridylyltransferase IPR016267; UTP--glucose-1-phosphate uridylyltransferase, subgroup	K00963 UGP2, galU, galF; UTP--glucose-1-phosphate uridylyltransferase [EC:2.7.7.9] [EC:2.7.7.9] Metabolism; Carbohydrate metabolism; Pentose and glucuronate interconversions [PATH:ko00040] Metabolism; Carbohydrate metabolism; Galactose metabolism [PATH:ko00052] Metabolism; Carbohydrate metabolism; Starch and sucrose metabolism [PATH:ko00500] Metabolism; Carbohydrate metabolism; Amino sugar and nu…
LOCMI00064	10.5584	14.7326	15.893	14.4494	14.8783	8.35271	Importin subunit alpha	KPNA1	Importin subunit alpha [Zootermopsis nevadensis]	NA	Uncharacterized protein OS=Atta cephalotes PE=4 SV=1	NA	NA	NA	NA
LOCMI00065	124.799	130.94	49.0555	24.2378	62.9206	62.4312	Mitotic-spindle organizing protein 1	mzt1	mitotic-spindle organizing gamma-tubulin ring associated protein [Coptotermes formosanus]	Mitotic-spindle organizing protein 1 OS=Xenopus laevis GN=mzt1 PE=3 SV=2	Mitotic-spindle organizing gamma-tubulin ring associated protein OS=Coptotermes formosanus PE=4 SV=1	NA	NA	IPR022214; Protein of unknown function DUF3743	K18633
LOCMI00066	127.938	141.313	99.9881	123.053	129.589	132.037	SH3 domain-binding glutamic acid-rich protein homolog	Sh3beta	PREDICTED: SH3 domain-binding glutamic acid-rich protein homolog isoform 1 [Bombus terrestris] ref|XP_003394453.1| PREDICTED: SH3 domain-binding glutamic acid-rich protein homolog isoform 2 [Bombus terrestris]	SH3 domain-binding glutamic acid-rich protein homolog OS=Drosophila melanogaster GN=Sh3beta PE=1 SV=2	Uncharacterized protein OS=Apis mellifera GN=LOC551916 PE=4 SV=1	NA	NA	IPR006993; SH3-binding, glutamic acid-rich protein IPR012336; Thioredoxin-like fold	NA
LOCMI00068	3.51948	3.30732	2.87826	5.24374	5.11088	5.88973	Metal transporter CNNM2	CNNM2	Metal transporter CNNM2 [Zootermopsis nevadensis]	Metal transporter CNNM2 OS=Homo sapiens GN=CNNM2 PE=1 SV=2	Uncharacterized protein OS=Apis mellifera GN=LOC552800 PE=4 SV=1	COG1253|Hemolysins and related proteins containing CBS domains|R|General function prediction only ;	NA	IPR000595; Cyclic nucleotide-binding domain IPR002550; Domain of unknown function DUF21 IPR014710; RmlC-like jelly roll fold IPR018490; Cyclic nucleotide-binding-like	K16302
LOCMI00069	3.51948	2.55566	6.0068	5.24374	2.83938	4.92596	Frizzled-2	fz2	class D atypical G-protein coupled receptor GPRfz2, putative [Pediculus humanus corporis] gb|EEB12517.1| class D atypical G-protein coupled receptor GPRfz2, putative [Pediculus humanus corporis]	Frizzled-2 OS=Drosophila melanogaster GN=fz2 PE=1 SV=1	Class D atypical G-protein coupled receptor GPRfz2, putative OS=Pediculus humanus subsp. corporis GN=Phum_PHUM188130 PE=4 SV=1	NA	GO:0004888; transmembrane signaling receptor activity; Molecular Function GO:0007166; cell surface receptor signaling pathway; Biological Process GO:0016020; membrane; Cellular Component GO:0016055; Wnt signaling pathway; Biological Process GO:0042813; Wnt-activated receptor activity; Molecular Function	IPR000539; Frizzled protein IPR015526; Frizzled/secreted frizzled-related protein IPR017981; GPCR, family 2-like IPR026547; Frizzled-5/8	NA
LOCMI00070	0	0	0	0	0	0	NA	LOCMI00070	PREDICTED: uncharacterized protein LOC100574550 [Acyrthosiphon pisum]	NA	Uncharacterized protein OS=Acyrthosiphon pisum PE=4 SV=1	NA	NA	NA	NA
LOCMI00071	0	0	0	0.582638	0	0	LOCMI00071	LOCMI00071	LOCMI00071	LOCMI00071	LOCMI00071	LOCMI00071	LOCMI00071	LOCMI00071	LOCMI00071
LOCMI00074	253.213	323.516	452.387	223.5	463.613	285.063	LOCMI00074	LOCMI00074	LOCMI00074	LOCMI00074	LOCMI00074	LOCMI00074	LOCMI00074	LOCMI00074	LOCMI00074
LOCMI00075	0.190242	0.150333	0.125142	0	0.113575	0.428344	Glucose dehydrogenase [FAD, quinone]	Gld	Glucose dehydrogenase [acceptor], partial [Zootermopsis nevadensis]	Glucose dehydrogenase [FAD, quinone] OS=Drosophila pseudoobscura pseudoobscura GN=Gld PE=3 SV=4	Uncharacterized protein OS=Bombyx mori PE=3 SV=1	COG2303|Choline dehydrogenase and related flavoproteins|E|Amino acid transport and metabolism ;	GO:0016614; oxidoreductase activity, acting on CH-OH group of donors; Molecular Function GO:0050660; flavin adenine dinucleotide binding; Molecular Function GO:0055114; oxidation-reduction process; Biological Process	IPR000172; Glucose-methanol-choline oxidoreductase, N-terminal IPR007867; Glucose-methanol-choline oxidoreductase, C-terminal	NA
LOCMI00076	1.3317	0	0	2.21403	0	0.53543	BTB/POZ domain-containing protein KCTD15	KCTD15	BTB/POZ domain-containing protein KCTD1, putative [Pediculus humanus corporis] gb|EEB18885.1| BTB/POZ domain-containing protein KCTD1, putative [Pediculus humanus corporis]	BTB/POZ domain-containing protein KCTD15 OS=Bos taurus GN=KCTD15 PE=2 SV=1	BTB/POZ domain-containing protein KCTD1, putative OS=Pediculus humanus subsp. corporis GN=Phum_PHUM537770 PE=4 SV=1	NA	NA	NA	NA
LOCMI00077	4.66094	7.3663	3.75425	10.0214	8.06383	6.85351	LOCMI00077	LOCMI00077	LOCMI00077	LOCMI00077	LOCMI00077	LOCMI00077	LOCMI00077	LOCMI00077	LOCMI00077
LOCMI00078	0.190242	0.300665	1.00113	0	0.4543	0.856688	Modifier of mdg4	mod(mdg4)	Protein bric-a-brac 2 [Zootermopsis nevadensis]	Modifier of mdg4 OS=Drosophila melanogaster GN=mod(mdg4) PE=1 SV=1	Uncharacterized protein OS=Danaus plexippus GN=KGM_08757 PE=4 SV=1	NA	GO:0005515; protein binding; Molecular Function	IPR000210; BTB/POZ-like IPR011333; BTB/POZ fold IPR013069; BTB/POZ	NA
LOCMI00079	0	0	0.375425	0	0	0	26S proteasome non-ATPase regulatory subunit 12	PSMD12	26S proteasome regulatory subunit N5 [Mucor circinelloides f. circinelloides 1006PhL]	26S proteasome non-ATPase regulatory subunit 12 OS=Bos taurus GN=PSMD12 PE=2 SV=3	26S proteasome regulatory subunit N5 OS=Mucor circinelloides f. circinelloides (strain 1006PhL) GN=HMPREF1544_05953 PE=4 SV=1	COG5071|26S proteasome regulatory complex component|O|Posttranslational modification, protein turnover, chaperones ;	NA	NA	NA
LOCMI00080	0	0	0	1.2818	0	0.428344	PREDICTED: MAM domain-containing protein 2-like	MAMDC2	PREDICTED: MAM domain-containing protein 2-like [Acyrthosiphon pisum]	NA	Uncharacterized protein OS=Acyrthosiphon pisum GN=LOC100165198 PE=4 SV=1	NA	GO:0016020; membrane; Cellular Component	IPR000998; MAM domain IPR008985; Concanavalin A-like lectin/glucanases superfamily	NA
LOCMI00083	0	0	0	0	0	0	Innexin inx7	Inx7	PREDICTED: innexin inx7 isoform X3 [Apis mellifera] ref|XP_006570950.1| PREDICTED: innexin inx7 isoform X1 [Apis mellifera]	Innexin inx7 OS=Drosophila melanogaster GN=Inx7 PE=2 SV=1	Innexin OS=Apis mellifera GN=inx7 PE=3 SV=1	NA	GO:0005921; gap junction; Cellular Component	IPR000990; Innexin	NA
LOCMI00085	0	0	0	0	0	0	Interferon-stimulated 20 kDa exonuclease-like 2	ISG20L2	PREDICTED: RNA exonuclease 4-like [Musca domestica]	Interferon-stimulated 20 kDa exonuclease-like 2 OS=Homo sapiens GN=ISG20L2 PE=1 SV=1	Putative deddh 3'-5' exonuclease domain of rna exonuclease 4 (Fragment) OS=Corethrella appendiculata PE=2 SV=1	COG0847|DNA polymerase III, epsilon subunit and related 3'-5' exonucleases|L|Replication, recombination and repair ;	GO:0003676; nucleic acid binding; Molecular Function	IPR012337; Ribonuclease H-like domain IPR013520; Exonuclease, RNase T/DNA polymerase III	NA
LOCMI00086	2.28291	2.55566	0	0	0	0	LOCMI00086	LOCMI00086	LOCMI00086	LOCMI00086	LOCMI00086	LOCMI00086	LOCMI00086	LOCMI00086	LOCMI00086
LOCMI00087	39.3802	44.4985	58.9417	49.4077	40.2056	24.6298	Mite allergen Lep d 7	Allergen	Mite allergen Lep d 7 [Zootermopsis nevadensis]	NA	50MGP OS=Reticulitermes flavipes PE=2 SV=1	NA	NA	NA	NA
LOCMI00089	0	0	0	0	0	0	Cyclin-Y-like protein 1	ccnyl1	cyclin domain-containing protein [Dictyostelium fasciculatum] gb|EGG23395.1| cyclin domain-containing protein [Dictyostelium fasciculatum]	Cyclin-Y-like protein 1 OS=Xenopus tropicalis GN=ccnyl1 PE=2 SV=1	Cyclin domain-containing protein OS=Dictyostelium fasciculatum (strain SH3) GN=DFA_05527 PE=3 SV=1	NA	NA	IPR006671; Cyclin, N-terminal IPR013763; Cyclin-like	NA
LOCMI00093	0	0	0	0.233055	0	0	Calpain-B	CalpB	hypothetical protein KGM_18013 [Danaus plexippus]	Calpain-B OS=Drosophila melanogaster GN=CalpB PE=1 SV=2	Uncharacterized protein OS=Danaus plexippus GN=KGM_18013 PE=4 SV=1	NA	GO:0004198; calcium-dependent cysteine-type endopeptidase activity; Molecular Function GO:0005622; intracellular; Cellular Component GO:0006508; proteolysis; Biological Process	IPR001300; Peptidase C2, calpain, catalytic domain IPR022684; Peptidase C2, calpain family	NA
LOCMI00094	5.51703	4.66031	5.38109	7.22471	0.908601	3.74801	LOCMI00094	LOCMI00094	LOCMI00094	LOCMI00094	LOCMI00094	LOCMI00094	LOCMI00094	LOCMI00094	LOCMI00094
LOCMI00095	13.1267	15.9353	9.26048	9.20568	8.97243	10.8157	DASH complex subunit Dad2	LOCMI00095	NA	NA	NA	NA	GO:0030472; mitotic spindle organization in nucleus; Biological Process GO:0042729; DASH complex; Cellular Component GO:0072686; mitotic spindle; Cellular Component	IPR013963; DASH complex subunit Dad2	NA
LOCMI00096	0	0	0.500566	0.233055	0.68145	0	Ubiquitin-conjugating enzyme E2 R2	UBE2R2	ubiquitin-conjugating enzyme E2 [Dictyostelium discoideum AX4] gb|AAC27763.1| ubiquitin-conjugating enzyme protein UbcC [Dictyostelium discoideum] gb|EAL65437.1| ubiquitin-conjugating enzyme E2 [Dictyostelium discoideum AX4]	Ubiquitin-conjugating enzyme E2 R2 OS=Oryctolagus cuniculus GN=UBE2R2 PE=2 SV=1	Ubiquitin-conjugating enzyme E2 OS=Dictyostelium discoideum GN=ubcC PE=2 SV=1	COG5078|Ubiquitin-protein ligase|O|Posttranslational modification, protein turnover, chaperones ;	GO:0016881; acid-amino acid ligase activity; Molecular Function	IPR000608; Ubiquitin-conjugating enzyme, E2 IPR016135; Ubiquitin-conjugating enzyme/RWD-like IPR023313; Ubiquitin-conjugating enzyme, active site	K02207 UBE2R, UBC3, CDC34; ubiquitin-conjugating enzyme E2 R [EC:6.3.2.19] [EC:6.3.2.19] Genetic Information Processing; Folding, sorting and degradation; SNAREs [BR:ko04131] Genetic Information Processing; Folding, sorting and degradation; Ubiquitin mediated proteolysis [PATH:ko04120] Human Diseases; Infectious diseases; Herpes simplex infection [PATH:ko05168]
LOCMI00098	0	0	0.375425	0	0	0	Serine/threonine-protein phosphatase 5	PP5	hypothetical protein CARUB_v10024697mg [Capsella rubella] gb|EOA28487.1| hypothetical protein CARUB_v10024697mg [Capsella rubella]	Serine/threonine-protein phosphatase 5 OS=Solanum lycopersicum GN=PP5 PE=1 SV=1	Uncharacterized protein OS=Capsella rubella GN=CARUB_v10024697mg PE=4 SV=1	COG0457|FOG: TPR repeat|R|General function prediction only ;	GO:0005515; protein binding; Molecular Function	IPR001440; Tetratricopeptide TPR1 IPR011990; Tetratricopeptide-like helical IPR013026; Tetratricopeptide repeat-containing domain IPR019734; Tetratricopeptide repeat	NA
LOCMI00099	1.3317	0.450998	3.25368	1.2818	1.93078	3.42675	LOCMI00099	LOCMI00099	LOCMI00099	LOCMI00099	LOCMI00099	LOCMI00099	LOCMI00099	LOCMI00099	LOCMI00099
LOCMI00101	2.37803	2.85632	2.37769	3.61236	3.1801	4.28344	Tyrosine-protein phosphatase 10D	Ptp10D	tyrosine-protein phosphatase 10D precursor, putative [Pediculus humanus corporis] gb|EEB18746.1| tyrosine-protein phosphatase 10D precursor, putative [Pediculus humanus corporis]	Tyrosine-protein phosphatase 10D OS=Drosophila melanogaster GN=Ptp10D PE=1 SV=3	Tyrosine-protein phosphatase 10D, putative OS=Pediculus humanus subsp. corporis GN=Phum_PHUM530510 PE=4 SV=1	NA	GO:0005515; protein binding; Molecular Function	IPR003961; Fibronectin, type III IPR013783; Immunoglobulin-like fold	NA
LOCMI00104	0.665848	0	0.375425	0	0.795025	0	LOCMI00104	LOCMI00104	LOCMI00104	LOCMI00104	LOCMI00104	LOCMI00104	LOCMI00104	LOCMI00104	LOCMI00104
LOCMI00105	26.5388	20.2949	15.7678	16.0808	22.4879	22.1668	Homeodomain-like DEK, C-terminal	LOCMI00105	NA	NA	NA	NA	GO:0003677; DNA binding; Molecular Function	IPR009057; Homeodomain-like IPR014876; DEK, C-terminal	NA
LOCMI00106	1.23658	0.901996	2.75312	0.349583	0.68145	0.642516	Calcium-transporting ATPase type 2C member 1	ATP2C1	Calcium-transporting ATPase type 2C member 1 [Zootermopsis nevadensis]	Calcium-transporting ATPase type 2C member 1 OS=Pongo abelii GN=ATP2C1 PE=2 SV=1	Uncharacterized protein OS=Atta cephalotes PE=4 SV=1	COG0474|Cation transport ATPase|P|Inorganic ion transport and metabolism ;	GO:0006812; cation transport; Biological Process GO:0016021; integral component of membrane; Cellular Component GO:0019829; cation-transporting ATPase activity; Molecular Function	IPR001757; Cation-transporting P-type ATPase IPR023214; HAD-like domain IPR023298; P-type ATPase, transmembrane domain	NA
LOCMI00107	9.41699	5.41198	6.25708	11.1867	9.54031	10.6015	Myosin heavy chain, non-muscle	zip	PREDICTED: myosin heavy chain, non-muscle-like isoform 2 [Bombus terrestris]	Myosin heavy chain, non-muscle OS=Drosophila melanogaster GN=zip PE=1 SV=2	Uncharacterized protein OS=Apis mellifera GN=Mhc2 PE=4 SV=1	COG5022|Myosin heavy chain|Z|Cytoskeleton ;	GO:0003774; motor activity; Molecular Function GO:0005515; protein binding; Molecular Function GO:0005524; ATP binding; Molecular Function GO:0016459; myosin complex; Cellular Component	IPR000048; IQ motif, EF-hand binding site IPR001609; Myosin head, motor domain IPR002928; Myosin tail IPR004009; Myosin, N-terminal, SH3-like IPR027401; Myosin-like IQ motif-containing domain IPR027417; P-loop containing nucleoside triphosphate hydrolase	K10352 MYH; myosin heavy chain K10352 Cellular Processes; Cell communication; Tight junction [PATH:ko04530]
LOCMI00108	5.42191	5.26165	9.38562	9.20568	7.49595	4.71179	LOCMI00108	LOCMI00108	LOCMI00108	LOCMI00108	LOCMI00108	LOCMI00108	LOCMI00108	LOCMI00108	LOCMI00108
LOCMI00109	4.18533	3.00665	3.62911	6.87513	1.70363	3.64093	LOCMI00109	LOCMI00109	LOCMI00109	LOCMI00109	LOCMI00109	LOCMI00109	LOCMI00109	LOCMI00109	LOCMI00109
LOCMI00110	579.478	569.31	1099.99	883.513	940.174	786.868	LOCMI00110	LOCMI00110	LOCMI00110	LOCMI00110	LOCMI00110	LOCMI00110	LOCMI00110	LOCMI00110	LOCMI00110
LOCMI00111	4.85118	3.15699	2.12741	1.39833	2.38508	4.6047	Ubiquitin carboxyl-terminal hydrolase isozyme L3	UCHL3	cysteine peptidase C12 containing ubiquitin carboxy-terminal hydrolase [Coptotermes formosanus]	Ubiquitin carboxyl-terminal hydrolase isozyme L3 OS=Sus scrofa GN=UCHL3 PE=2 SV=1	Cysteine peptidase C12 containing ubiquitin carboxy-terminal hydrolase OS=Coptotermes formosanus PE=2 SV=1	NA	GO:0004221; ubiquitin thiolesterase activity; Molecular Function GO:0005622; intracellular; Cellular Component GO:0006511; ubiquitin-dependent protein catabolic process; Biological Process	IPR001578; Peptidase C12, ubiquitin carboxyl-terminal hydrolase 1	NA
LOCMI00112	10.2731	8.11797	8.38449	5.01069	7.38238	4.28344	Beta-1,4-N-acetylgalactosaminyltransferase bre-4	bre-4	Beta-1,4-N-acetylgalactosaminyltransferase bre-4 [Zootermopsis nevadensis]	Beta-1,4-N-acetylgalactosaminyltransferase bre-4 OS=Caenorhabditis briggsae GN=bre-4 PE=3 SV=1	Putative uncharacterized protein (Fragment) OS=Solenopsis invicta GN=SINV_11862 PE=4 SV=1	NA	GO:0005975; carbohydrate metabolic process; Biological Process GO:0016757; transferase activity, transferring glycosyl groups; Molecular Function	IPR003859; Beta-1,4-galactosyltransferase IPR027791; Galactosyltransferase, C-terminal domain	NA
LOCMI00113	6.94384	3.90865	4.75538	6.99166	9.65388	7.28185	RNA polymerase II subunit A C-terminal domain phosphatase	CTDP1	RNA polymerase II subunit A C-terminal domain phosphatase [Zootermopsis nevadensis]	NA	RNA polymerase II subunit A C-terminal domain phosphatase OS=Harpegnathos saltator GN=EAI_17216 PE=4 SV=1	NA	NA	IPR011053; Single hybrid motif	NA
LOCMI00115	2.18779	1.50333	2.50283	2.33055	1.47648	1.07086	Gametogenetin-binding protein 2	GGNBP2	Gametogenetin-binding protein 2 [Zootermopsis nevadensis]	NA	NA	NA	NA	NA	NA
LOCMI00116	42.0436	40.1388	53.6858	35.8905	30.3245	40.5856	Ryanodine receptor 44F	Rya-r44F	Ryanodine receptor 44F [Cerapachys biroi]	Ryanodine receptor 44F OS=Drosophila melanogaster GN=Rya-r44F PE=1 SV=3	Uncharacterized protein (Fragment) OS=Rhodnius prolixus PE=4 SV=1	NA	NA	IPR015925; Ryanodine receptor-related	NA
LOCMI00117	2.56827	3.00665	3.37882	2.56361	2.49865	2.46298	Histone-lysine N-methyltransferase trr	trr	Histone-lysine N-methyltransferase trr [Zootermopsis nevadensis]	Histone-lysine N-methyltransferase trr OS=Drosophila melanogaster GN=trr PE=1 SV=2	Uncharacterized protein OS=Nasonia vitripennis PE=4 SV=1	COG2940|Proteins containing SET domain|R|General function prediction only ;	GO:0005515; protein binding; Molecular Function GO:0005634; nucleus; Cellular Component GO:0008270; zinc ion binding; Molecular Function	IPR001214; SET domain IPR001965; Zinc finger, PHD-type IPR003888; FY-rich, N-terminal IPR003889; FY-rich, C-terminal	K09188 MLL3; histone-lysine N-methyltransferase MLL3 [EC:2.1.1.43] [EC:2.1.1.43] Metabolism; Amino acid metabolism; Lysine degradation [PATH:ko00310]
LOCMI00118	0.285363	0.450998	1.12627	0.699166	0	0.642516	LDLR chaperone boca	boca	Mesoderm development candidate, putative [Pediculus humanus corporis] gb|EEB15833.1| Mesoderm development candidate, putative [Pediculus humanus corporis]	LDLR chaperone boca OS=Drosophila melanogaster GN=boca PE=1 SV=2	Mesoderm development candidate, putative OS=Pediculus humanus subsp. corporis GN=Phum_PHUM390880 PE=4 SV=1	NA	NA	IPR019330; Mesoderm development candidate 2	NA
LOCMI00119	41.6631	55.0218	46.0521	29.8311	32.8232	32.9825	Heme oxygenase	pbsA	Heme oxygenase 1 [Zootermopsis nevadensis]	Heme oxygenase OS=Guillardia theta GN=pbsA PE=3 SV=1	Putative uncharacterized protein OS=Daphnia pulex GN=DAPPUDRAFT_222567 PE=4 SV=1	COG5398|Heme oxygenase|P|Inorganic ion transport and metabolism ;	GO:0004392; heme oxygenase (decyclizing) activity; Molecular Function GO:0006788; heme oxidation; Biological Process GO:0055114; oxidation-reduction process; Biological Process	IPR002051; Haem oxygenase IPR016053; Haem oxygenase-like IPR016084; Haem oxygenase-like, multi-helical	K00510 HMOX, hmuO, ho; heme oxygenase [EC:1.14.99.3] [EC:1.14.99.3] Metabolism; Metabolism of cofactors and vitamins; Porphyrin and chlorophyll metabolism [PATH:ko00860] Organismal Systems; Digestive system; Mineral absorption [PATH:ko04978]
LOCMI00120	2.28291	1.05233	2.62797	1.16528	2.38508	2.57007	LOCMI00120	LOCMI00120	LOCMI00120	LOCMI00120	LOCMI00120	LOCMI00120	LOCMI00120	LOCMI00120	LOCMI00120
LOCMI00121	12.6511	21.4976	17.1444	18.994	21.5793	21.096	Putative uncharacterized protein	LOCMI00121	PREDICTED: uncharacterized protein LOC657682 isoform X1 [Tribolium castaneum]	NA	Putative uncharacterized protein OS=Tribolium castaneum GN=TcasGA2_TC010970 PE=4 SV=1	NA	NA	NA	NA
LOCMI00122	0	0.601331	0.500566	0.815694	0.795025	0.428344	Ribosomal RNA large subunit methyltransferase E	rlmE	ribosomal RNA large subunit methyltransferase E [Porphyrobacter cryptus]	Ribosomal RNA large subunit methyltransferase E OS=Parvibaculum lavamentivorans (strain DS-1 / DSM 13023 / NCIMB 13966) GN=rlmE PE=3 SV=1	23S rRNA methyltransferase J OS=Roseivivax sp. 22II-s10s GN=rrmJ PE=4 SV=1	COG0293|23S rRNA methylase|J|Translation, ribosomal structure and biogenesis ;	GO:0001510; RNA methylation; Biological Process GO:0008168; methyltransferase activity; Molecular Function GO:0032259; methylation; Biological Process	IPR002877; Ribosomal RNA methyltransferase FtsJ domain IPR015507; Ribosomal RNA large subunit methyltransferase E	NA
LOCMI00123	37.9533	40.7402	45.051	58.2638	47.0201	50.3304	Vacuolar protein sorting-associated protein VTA1 homolog	VTA1	Vacuolar protein sorting-associated protein VTA1-like protein [Zootermopsis nevadensis]	Vacuolar protein sorting-associated protein VTA1 homolog OS=Bos taurus GN=VTA1 PE=2 SV=1	Uncharacterized protein OS=Rhodnius prolixus PE=4 SV=1	NA	NA	IPR023175; Vacuolar protein sorting-associate protein Vta1/Callose synthase, N-terminal domain	K12199 VTA1, LIP5; vacuolar protein sorting-associated protein VTA1 K12199 Cellular Processes; Transport and catabolism; Endocytosis [PATH:ko04144]
LOCMI00125	0	0	0.375425	0	0	0	Synaptic vesicle membrane protein VAT-1 homolog	Vat1	PREDICTED: synaptic vesicle membrane protein VAT-1 homolog [Taeniopygia guttata]	Synaptic vesicle membrane protein VAT-1 homolog OS=Mus musculus GN=Vat1 PE=1 SV=3	Uncharacterized protein OS=Sus scrofa GN=VAT1 PE=4 SV=1	NA	GO:0008270; zinc ion binding; Molecular Function GO:0016491; oxidoreductase activity; Molecular Function GO:0055114; oxidation-reduction process; Biological Process	IPR002085; Alcohol dehydrogenase superfamily, zinc-type IPR016040; NAD(P)-binding domain	NA
LOCMI00127	75.0506	75.918	76.0861	92.756	78.9347	80.6358	Serine/threonine-protein phosphatase PP1-alpha catalytic subunit	Ppp1ca	Serine/threonine-protein phosphatase alpha-1 isoform [Camponotus floridanus]	Serine/threonine-protein phosphatase PP1-alpha catalytic subunit OS=Rattus norvegicus GN=Ppp1ca PE=1 SV=1	Serine/threonine-protein phosphatase alpha-1 isoform OS=Camponotus floridanus GN=EAG_04518 PE=4 SV=1	COG0639|Diadenosine tetraphosphatase and related serine/threonine protein phosphatases|T|Signal transduction mechanisms ;	GO:0016787; hydrolase activity; Molecular Function	IPR004843; Phosphoesterase domain IPR006186; Serine/threonine-specific protein phosphatase/bis(5-nucleosyl)-tetraphosphatase	K06269 PPP1C; serine/threonine-protein phosphatase PP1 catalytic subunit [EC:3.1.3.16] [EC:3.1.3.16] Genetic Information Processing; Translation; mRNA surveillance pathway [PATH:ko03015] Environmental Information Processing; Signal transduction; Hippo signaling pathway [PATH:ko04390] Environmental Information Processing; Signal transduction; cGMP - PKG signaling pathway [PATH:ko04022] Cellular Pr…
LOCMI00128	0	0	3.37882	0.349583	0	0	Proteasome subunit alpha type-7	psmA7	proteasome subunit alpha type 7 [Dictyostelium purpureum] gb|EGC34415.1| proteasome subunit alpha type 7 [Dictyostelium purpureum]	Proteasome subunit alpha type-7 OS=Dictyostelium discoideum GN=psmA7 PE=3 SV=1	Proteasome subunit alpha type (Fragment) OS=Dictyostelium purpureum GN=DICPUDRAFT_48337 PE=3 SV=1	COG0638|20S proteasome, alpha and beta subunits|O|Posttranslational modification, protein turnover, chaperones ;	GO:0004175; endopeptidase activity; Molecular Function GO:0004298; threonine-type endopeptidase activity; Molecular Function GO:0005839; proteasome core complex; Cellular Component GO:0006511; ubiquitin-dependent protein catabolic process; Biological Process GO:0019773; proteasome core complex, alpha-subunit complex; Cellular Component GO:0051603; proteolysis involved in cellular protein cataboli…	IPR000426; Proteasome alpha-subunit, N-terminal domain IPR001353; Proteasome, subunit alpha/beta IPR023332; Proteasome A-type subunit	NA
LOCMI00129	0	0	0	0.932221	0	0	ABC transporter C family member 8	abcC8	YALI0F31845p [Yarrowia lipolytica] emb|CAG78924.1| YALI0F31845p [Yarrowia lipolytica CLIB122]	ABC transporter C family member 8 OS=Dictyostelium discoideum GN=abcC8 PE=3 SV=1	YALI0F31845p OS=Yarrowia lipolytica (strain CLIB 122 / E 150) GN=YALI0_F31845g PE=3 SV=1	COG1132|ABC-type multidrug transport system, ATPase and permease components|V|Defense mechanisms ;	NA	IPR027417; P-loop containing nucleoside triphosphate hydrolase	NA
LOCMI00130	1.8073	0.751664	0	1.63139	1.59005	0	60S ribosomal protein L38	RpL38	PREDICTED: 60S ribosomal protein L38-like [Megachile rotundata]	60S ribosomal protein L38 OS=Spodoptera frugiperda GN=RpL38 PE=3 SV=1	Uncharacterized protein OS=Nasonia vitripennis PE=3 SV=1	NA	GO:0003735; structural constituent of ribosome; Molecular Function GO:0005622; intracellular; Cellular Component GO:0005840; ribosome; Cellular Component GO:0006412; translation; Biological Process	IPR002675; Ribosomal protein L38e	K02923 RP-L38e, RPL38; large subunit ribosomal protein L38e K02923 Genetic Information Processing; Translation; Ribosome [PATH:ko03010]
LOCMI00131	48.6069	46.4528	36.5414	37.8715	34.8675	39.7289	Proteasome subunit alpha type-4	Psma4	Proteasome subunit alpha type-4 [Zootermopsis nevadensis]	Proteasome subunit alpha type-4 OS=Mus musculus GN=Psma4 PE=1 SV=1	Proteasome subunit alpha type OS=Papilio xuthus PE=2 SV=1	COG0638|20S proteasome, alpha and beta subunits|O|Posttranslational modification, protein turnover, chaperones ;	GO:0004175; endopeptidase activity; Molecular Function GO:0004298; threonine-type endopeptidase activity; Molecular Function GO:0005839; proteasome core complex; Cellular Component GO:0051603; proteolysis involved in cellular protein catabolic process; Biological Process	IPR001353; Proteasome, subunit alpha/beta IPR016050; Proteasome beta-type subunit, conserved site IPR023332; Proteasome A-type subunit	K02728 PSMA4; 20S proteasome subunit alpha 3 [EC:3.4.25.1] [EC:3.4.25.1] Genetic Information Processing; Folding, sorting and degradation; Proteasome [PATH:ko03050]
LOCMI00132	238.849	312.842	299.464	288.289	411.823	325.97	40S ribosomal protein S17	RpS17	40S ribosomal protein S17 [Zootermopsis nevadensis]	40S ribosomal protein S17 OS=Spodoptera frugiperda GN=RpS17 PE=2 SV=3	40S ribosomal protein S17, putative OS=Pediculus humanus subsp. corporis GN=Phum_PHUM019130 PE=3 SV=1	COG1383|Ribosomal protein S17E|J|Translation, ribosomal structure and biogenesis ;	GO:0003735; structural constituent of ribosome; Molecular Function GO:0005622; intracellular; Cellular Component GO:0005840; ribosome; Cellular Component GO:0006412; translation; Biological Process	IPR001210; Ribosomal protein S17e	K02962 RP-S17e, RPS17; small subunit ribosomal protein S17e K02962 Genetic Information Processing; Translation; Ribosome [PATH:ko03010]
LOCMI00133	0	0	0.375425	0.349583	0	0.321258	Vesicle-trafficking protein SEC22b	SEC22B	hypothetical protein PPL_05709 [Polysphondylium pallidum PN500]	Vesicle-trafficking protein SEC22b OS=Gallus gallus GN=SEC22B PE=2 SV=1	Uncharacterized protein OS=Polysphondylium pallidum GN=PPL_05709 PE=4 SV=1	COG5143|Synaptobrevin/VAMP-like protein|U|Intracellular trafficking, secretion, and vesicular transport ;	GO:0006810; transport; Biological Process	IPR010908; Longin domain IPR011012; Longin-like domain	NA
LOCMI00134	0	1.80399	0.250283	1.63139	2.15793	0	Putative odorant-binding protein A10	CSP	hypothetical protein [Locusta migratoria]	Putative odorant-binding protein A10 OS=Drosophila melanogaster GN=a10 PE=1 SV=2	Putative uncharacterized protein (Fragment) OS=Locusta migratoria PE=2 SV=1	NA	NA	IPR005055; Insect odorant-binding protein A10/Ejaculatory bulb-specific protein 3	NA
LOCMI00135	7.41945	9.47096	6.38222	10.4875	7.15523	14.5637	Protein brunelleschi	bru	NIK- and IKBKB-binding protein-like protein [Zootermopsis nevadensis]	Protein brunelleschi OS=Drosophila melanogaster GN=bru PE=1 SV=2	Uncharacterized protein OS=Atta cephalotes PE=4 SV=1	NA	NA	IPR013935; TRAPP II complex, Trs120	NA
LOCMI00136	2.56827	2.85632	3.87939	1.2818	1.70363	2.46298	Protein SERAC1	serac1	Protein SERAC1 [Zootermopsis nevadensis]	Protein SERAC1 OS=Danio rerio GN=serac1 PE=3 SV=1	Uncharacterized protein (Fragment) OS=Rhodnius prolixus PE=4 SV=1	NA	NA	NA	NA
LOCMI00137	0	0	2.75312	1.39833	0.340725	0.321258	Cysteine protease 1	CP1	predicted protein [Bathycoccus prasinos] emb|CCO66241.1| predicted protein [Bathycoccus prasinos]	Cysteine protease 1 OS=Oryza sativa subsp. japonica GN=CP1 PE=2 SV=2	Uncharacterized protein OS=Bathycoccus prasinos GN=Bathy07g03030 PE=3 SV=1	NA	GO:0006508; proteolysis; Biological Process GO:0008234; cysteine-type peptidase activity; Molecular Function	IPR000668; Peptidase C1A, papain C-terminal IPR013128; Peptidase C1A, papain	NA
LOCMI00138	0	0	0	0.233055	0	0	Ankyrin repeat domain-containing protein 11	ANKRD11	ankyrin [Methanotorris formicicus] gb|EHP85620.1| Ankyrin [Methanotorris formicicus Mc-S-70]	Ankyrin repeat domain-containing protein 11 OS=Homo sapiens GN=ANKRD11 PE=1 SV=3	Ankyrin OS=Methanotorris formicicus Mc-S-70 GN=MetfoDRAFT_1296 PE=4 SV=1	COG0666|FOG: Ankyrin repeat|R|General function prediction only ;	GO:0005515; protein binding; Molecular Function	IPR002110; Ankyrin repeat IPR020683; Ankyrin repeat-containing domain	NA
LOCMI00142	11.6999	6.46431	7.5085	6.7586	7.95025	6.42516	Protein lethal(2)essential for life	l(2)efl	heat shock protein 20.5 [Locusta migratoria]	Protein lethal(2)essential for life OS=Drosophila melanogaster GN=l(2)efl PE=1 SV=1	Heat shock protein 20.5 OS=Locusta migratoria PE=2 SV=1	NA	NA	IPR001436; Alpha crystallin/Heat shock protein IPR002068; Alpha crystallin/Hsp20 domain IPR008978; HSP20-like chaperone	NA
LOCMI00143	61.6385	79.2253	108.873	118.392	97.1067	90.1665	LOCMI00143	LOCMI00143	LOCMI00143	LOCMI00143	LOCMI00143	LOCMI00143	LOCMI00143	LOCMI00143	LOCMI00143
LOCMI00144	4.09021	3.90865	2.00227	2.68014	1.59005	0.642516	Vacuolar protein sorting-associated protein 13D	VPS13D	Vacuolar protein sorting-associated protein 13D [Cerapachys biroi]	Vacuolar protein sorting-associated protein 13D OS=Homo sapiens GN=VPS13D PE=1 SV=1	Putative uncharacterized protein OS=Tribolium castaneum GN=TcasGA2_TC011939 PE=4 SV=1	COG5043|Vacuolar protein sorting-associated protein|U|Intracellular trafficking, secretion, and vesicular transport ;	NA	IPR026847; Vacuolar protein sorting-associated protein 13 IPR026854; Vacuolar protein sorting-associated protein 13A N-terminal domain	NA
LOCMI00146	138.687	109.593	117.758	119.091	106.874	86.7397	Nucleoplasmin-like protein	Nlp	nucleoplasmin isoform 1-like protein [Maconellicoccus hirsutus]	Nucleoplasmin-like protein OS=Drosophila melanogaster GN=Nlp PE=1 SV=1	Nucleoplasmin-like protein OS=Anoplophora glabripennis GN=NLP PE=4 SV=1	NA	GO:0003676; nucleic acid binding; Molecular Function	IPR004301; Nucleoplasmin IPR024057; Nucleoplasmin core domain	K11278
LOCMI00147	1006.1	1382.16	1483.18	1081.49	1102.47	1022.46	RP-SAe, RPSA small subunit ribosomal protein SAe	Rpsa	PREDICTED: 40S ribosomal protein SA [Tribolium castaneum] gb|EFA08849.1| hypothetical protein TcasGA2_TC006550 [Tribolium castaneum]	40S ribosomal protein SA OS=Diaphorina citri PE=2 SV=1	40S ribosomal protein SA OS=Tribolium castaneum GN=TcasGA2_TC006550 PE=3 SV=1	COG0052|Ribosomal protein S2|J|Translation, ribosomal structure and biogenesis ;	GO:0003735; structural constituent of ribosome; Molecular Function GO:0005622; intracellular; Cellular Component GO:0005840; ribosome; Cellular Component GO:0006412; translation; Biological Process GO:0015935; small ribosomal subunit; Cellular Component	IPR001865; Ribosomal protein S2 IPR005707; Ribosomal protein S2, eukaryotic/archaeal IPR023591; Ribosomal protein S2, flavodoxin-like domain	K02998 RP-SAe, RPSA; small subunit ribosomal protein SAe K02998 Genetic Information Processing; Translation; Ribosome [PATH:ko03010]
LOCMI00148	2.28291	1.35299	2.00227	3.84541	2.04435	1.71338	LOCMI00148	LOCMI00148	LOCMI00148	LOCMI00148	LOCMI00148	LOCMI00148	LOCMI00148	LOCMI00148	LOCMI00148
LOCMI00149	0.285363	0.150333	0.375425	0	0.340725	0.107086	Golgi-associated PDZ and coiled-coil motif-containing protein	GOPC	Golgi-associated PDZ and coiled-coil motif-containing protein [Zootermopsis nevadensis]	NA	NA	NA	NA	NA	NA
LOCMI00150	0.760969	0.601331	2.00227	0.466111	0	1.71338	WD repeat-containing protein CG11141	CG11141	WD repeat-containing protein [Cerapachys biroi]	WD repeat-containing protein CG11141 OS=Drosophila melanogaster GN=CG11141 PE=1 SV=1	Uncharacterized protein OS=Atta cephalotes PE=4 SV=1	NA	GO:0005515; protein binding; Molecular Function	IPR015943; WD40/YVTN repeat-like-containing domain IPR017986; WD40-repeat-containing domain	NA
LOCMI00151	148.009	204.452	154.675	62.1092	75.1867	64.68	39S ribosomal protein L12, mitochondrial	MRPL12	39S ribosomal protein L12, mitochondrial [Acyrthosiphon pisum] dbj|BAH70973.1| ACYPI008498 [Acyrthosiphon pisum]	NA	ACYPI008498 protein OS=Acyrthosiphon pisum GN=ACYPI008498 PE=2 SV=1	NA	GO:0003735; structural constituent of ribosome; Molecular Function GO:0005622; intracellular; Cellular Component GO:0005840; ribosome; Cellular Component GO:0006412; translation; Biological Process	IPR000206; Ribosomal protein L7/L12 IPR014719; Ribosomal protein L7/L12, C-terminal/adaptor protein ClpS-like	K02935 RP-L7, MRPL12, rplL; large subunit ribosomal protein L7/L12 K02935 Genetic Information Processing; Translation; Ribosome [PATH:ko03010]
LOCMI00152	155.143	114.554	62.5708	57.7977	76.0953	103.338	LOCMI00152	LOCMI00152	LOCMI00152	LOCMI00152	LOCMI00152	LOCMI00152	LOCMI00152	LOCMI00152	LOCMI00152
LOCMI00155	39.7606	48.4071	25.1535	39.8525	61.4441	50.1163	Protein FAM136A	fam136a	hypothetical protein L798_14543 [Zootermopsis nevadensis]	Protein FAM136A OS=Xenopus tropicalis GN=fam136a PE=2 SV=1	Uncharacterized protein OS=Nasonia vitripennis PE=4 SV=1	NA	NA	IPR008560; Protein of unknown function DUF842, eukaryotic	NA
LOCMI00156	32.5314	32.4719	22.1501	30.2972	40.3192	53.3289	Cysteine and histidine-rich protein 1	cyhr1	Cysteine and histidine-rich protein 1-like protein [Zootermopsis nevadensis]	Cysteine and histidine-rich protein 1 OS=Danio rerio GN=cyhr1 PE=2 SV=1	Uncharacterized protein (Fragment) OS=Dendroctonus ponderosae GN=YQE_05448 PE=4 SV=1	NA	NA	NA	NA
LOCMI00157	0	1.65366	1.37656	1.63139	2.49865	2.67715	LOCMI00157	LOCMI00157	LOCMI00157	LOCMI00157	LOCMI00157	LOCMI00157	LOCMI00157	LOCMI00157	LOCMI00157
LOCMI00158	0.475606	0	2.50283	0	0.567875	0	Histidine triad nucleotide-binding protein 1	hint-1	Histidine triad nucleotide-binding protein [Echinococcus granulosus]	Histidine triad nucleotide-binding protein 1 OS=Caenorhabditis elegans GN=hint-1 PE=4 SV=1	Serine:threonine protein kinase KDX1 OS=Echinococcus granulosus GN=EgrG_000597600 PE=4 SV=1	COG0537|Diadenosine tetraphosphate (Ap4A) hydrolase and other HIT family hydrolases|FGR|Nucleotide transport and metabolism ; Carbohydrate transport and metabolism ; General function prediction only ;	GO:0003824; catalytic activity; Molecular Function	IPR001310; Histidine triad (HIT) protein IPR011146; HIT-like domain IPR019808; Histidine triad, conserved site	NA
LOCMI00159	0	0	0	0	0.340725	0	LOCMI00159	LOCMI00159	LOCMI00159	LOCMI00159	LOCMI00159	LOCMI00159	LOCMI00159	LOCMI00159	LOCMI00159
LOCMI00160	0.475606	0	0	0	1.13575	0.53543	Putative uncharacterized protein	LOCMI00160	hypothetical protein L798_11595, partial [Zootermopsis nevadensis]	NA	Putative uncharacterized protein OS=Pediculus humanus subsp. corporis GN=Phum_PHUM497570 PE=4 SV=1	NA	NA	NA	NA
LOCMI00161	28.0607	30.6679	48.6801	24.2378	18.172	17.5621	Probable 4-coumarate--CoA ligase 3	4cl3	PREDICTED: 4-coumarate--CoA ligase 3-like [Acyrthosiphon pisum]	Probable 4-coumarate--CoA ligase 3 OS=Dictyostelium discoideum GN=4cl3 PE=3 SV=2	Uncharacterized protein OS=Nasonia vitripennis PE=4 SV=1	COG0318|Acyl-CoA synthetases (AMP-forming)/AMP-acid ligases II|IQ|Lipid transport and metabolism ; Secondary metabolites biosynthesis, transport and catabolism ;	GO:0003824; catalytic activity; Molecular Function GO:0008152; metabolic process; Biological Process	IPR000873; AMP-dependent synthetase/ligase IPR020845; AMP-binding, conserved site IPR025110; AMP-binding enzyme C-terminal domain	NA
LOCMI00163	18.7389	19.3929	19.7724	21.6741	15.9005	9.959	Ubiquitin-conjugating enzyme E2 O	UBE2O	Ubiquitin-conjugating enzyme E2 O [Zootermopsis nevadensis]	NA	Uncharacterized protein OS=Rhodnius prolixus PE=4 SV=1	NA	NA	NA	NA
LOCMI00164	271.095	372.224	375.8	352.729	467.021	391.185	60S ribosomal protein L35a	RPL35A	ribosomal protein L35Ae [Cicindela campestris]	60S ribosomal protein L35a OS=Pongo abelii GN=RPL35A PE=3 SV=1	Ribosomal protein L35Ae OS=Cicindela campestris GN=rpL35Ae PE=2 SV=1	COG2451|Ribosomal protein L35AE/L33A|J|Translation, ribosomal structure and biogenesis ;	GO:0003735; structural constituent of ribosome; Molecular Function GO:0005622; intracellular; Cellular Component GO:0005840; ribosome; Cellular Component GO:0006412; translation; Biological Process	IPR001780; Ribosomal protein L35A IPR009000; Translation protein, beta-barrel domain	NA
LOCMI00165	0.285363	0	0.375425	0	0	0	LOCMI00165	LOCMI00165	LOCMI00165	LOCMI00165	LOCMI00165	LOCMI00165	LOCMI00165	LOCMI00165	LOCMI00165
LOCMI00166	0	0	0.75085	0.699166	0	0.321258	LOCMI00166	LOCMI00166	LOCMI00166	LOCMI00166	LOCMI00166	LOCMI00166	LOCMI00166	LOCMI00166	LOCMI00166
LOCMI00167	8.0853	2.40532	6.75765	2.44708	6.92808	6.53225	LOCMI00167	LOCMI00167	LOCMI00167	LOCMI00167	LOCMI00167	LOCMI00167	LOCMI00167	LOCMI00167	LOCMI00167
LOCMI00168	8.18042	4.05898	5.63137	5.24374	4.0887	9.85192	Chromobox protein homolog 1	Cbx1	Chromobox protein-like protein 5 [Zootermopsis nevadensis]	Chromobox protein homolog 1 OS=Mus musculus GN=Cbx1 PE=1 SV=1	NA	NA	NA	IPR000953; Chromo domain/shadow IPR016197; Chromo domain-like IPR023779; Chromo domain, conserved site IPR023780; Chromo domain	NA
LOCMI00169	5.51703	1.50333	7.25821	6.05944	5.9059	5.24722	Galactosylgalactosylxylosylprotein 3-beta-glucuronosyltransferase 3	B3gat3	Galactosylgalactosylxylosylprotein 3-beta-glucuronosyltransferase I [Zootermopsis nevadensis]	Galactosylgalactosylxylosylprotein 3-beta-glucuronosyltransferase 3 OS=Mus musculus GN=B3gat3 PE=2 SV=1	Uncharacterized protein OS=Acyrthosiphon pisum GN=LOC100159562 PE=4 SV=1	NA	GO:0015018; galactosylgalactosylxylosylprotein 3-beta-glucuronosyltransferase activity; Molecular Function GO:0016020; membrane; Cellular Component	IPR005027; Glycosyl transferase, family 43	NA
LOCMI00170	0	0	2.75312	0	0.4543	0.642516	LOCMI00170	LOCMI00170	LOCMI00170	LOCMI00170	LOCMI00170	LOCMI00170	LOCMI00170	LOCMI00170	LOCMI00170
LOCMI00171	0	0	0	0.233055	0	0	Ubiquitin domain-containing protein DSK2b	DSK2B	ubiquitin domain containing protein [Acanthamoeba castellanii str. Neff] gb|ELR11978.1| ubiquitin domain containing protein [Acanthamoeba castellanii str. Neff]	Ubiquitin domain-containing protein DSK2b OS=Arabidopsis thaliana GN=DSK2B PE=1 SV=1	Ubiquitin domain containing protein OS=Acanthamoeba castellanii str. Neff GN=ACA1_400570 PE=4 SV=1	NA	NA	IPR015496; Ubiquilin	K04523 UBQLN, DSK2; ubiquilin K04523 Genetic Information Processing; Folding, sorting and degradation; Protein processing in endoplasmic reticulum [PATH:ko04141]
LOCMI00172	0	0	0	0	0	0	Transcription initiation factor IIA subunit 2	TOA2	PREDICTED: transcription initiation factor IIA subunit 2-like [Setaria italica]	Transcription initiation factor IIA subunit 2 OS=Magnaporthe oryzae (strain 70-15 / ATCC MYA-4617 / FGSC 8958) GN=TOA2 PE=3 SV=1	Transcription initiation factor IIA subunit 2 OS=Setaria italica GN=Si018773m.g PE=3 SV=1	COG5123|Transcription initiation factor IIA, gamma subunit|K|Transcription ;	GO:0005672; transcription factor TFIIA complex; Cellular Component GO:0006367; transcription initiation from RNA polymerase II promoter; Biological Process	IPR003194; Transcription initiation factor IIA, gamma subunit IPR009083; Transcription factor IIA, helical IPR009088; Transcription factor IIA, beta-barrel IPR015871; Transcription initiation factor IIA, gamma subunit, C-terminal IPR015872; Transcription initiation factor IIA, gamma subunit, N-terminal	NA
LOCMI00173	13.9828	13.5299	13.6404	18.5279	13.5154	15.3133	Beta-centractin	ACTR1B	Beta-centractin [Zootermopsis nevadensis]	Beta-centractin OS=Homo sapiens GN=ACTR1B PE=1 SV=1	Uncharacterized protein OS=Apis mellifera GN=LOC551438 PE=3 SV=1	COG5277|Actin and related proteins|Z|Cytoskeleton ;	NA	IPR004000; Actin-related protein IPR004001; Actin, conserved site IPR020902; Actin/actin-like conserved site	K16575
LOCMI00175	0	0	0	0.582638	0	0	SAP domain	LOCMI00175	NA	NA	NA	NA	GO:0003676; nucleic acid binding; Molecular Function	IPR003034; SAP domain	NA
LOCMI00176	1.52194	0	0.250283	1.16528	0	0.856688	LOCMI00176	LOCMI00176	LOCMI00176	LOCMI00176	LOCMI00176	LOCMI00176	LOCMI00176	LOCMI00176	LOCMI00176
LOCMI00178	15.695	16.5366	17.7701	15.8478	15.1055	18.7401	E3 ubiquitin-protein ligase AMFR	AMFR	hypothetical protein L798_09082, partial [Zootermopsis nevadensis]	E3 ubiquitin-protein ligase AMFR OS=Homo sapiens GN=AMFR PE=1 SV=2	Putative e3 ubiquitin-protein ligase amfr OS=Rhipicephalus pulchellus PE=2 SV=1	NA	GO:0004842; ubiquitin-protein transferase activity; Molecular Function	IPR026608; E3 ubiquitin-protein ligase AMFR	K10636 AMFR, GP78; autocrine motility factor receptor [EC:6.3.2.19] [EC:6.3.2.19] Genetic Information Processing; Folding, sorting and degradation; Protein processing in endoplasmic reticulum [PATH:ko04141]
LOCMI00179	3.04388	2.85632	0.625708	1.63139	1.02218	0.963774	Nucleoside diphosphate kinase 7	Nme7	Nucleoside diphosphate kinase 7 [Zootermopsis nevadensis]	Nucleoside diphosphate kinase 7 OS=Rattus norvegicus GN=Nme7 PE=1 SV=1	Nucleoside diphosphate kinase OS=Daphnia pulex GN=DAPPUDRAFT_97012 PE=3 SV=1	COG0105|Nucleoside diphosphate kinase|F|Nucleotide transport and metabolism ;	GO:0004550; nucleoside diphosphate kinase activity; Molecular Function GO:0005524; ATP binding; Molecular Function GO:0006165; nucleoside diphosphate phosphorylation; Biological Process GO:0006183; GTP biosynthetic process; Biological Process GO:0006228; UTP biosynthetic process; Biological Process GO:0006241; CTP biosynthetic process; Biological Process	IPR001564; Nucleoside diphosphate kinase IPR023005; Nucleoside diphosphate kinase, active site	K00940 E2.7.4.6, ndk; nucleoside-diphosphate kinase [EC:2.7.4.6] [EC:2.7.4.6] Metabolism; Nucleotide metabolism; Purine metabolism [PATH:ko00230] Metabolism; Nucleotide metabolism; Pyrimidine metabolism [PATH:ko00240]
LOCMI00180	7.89506	2.25499	11.0125	10.9536	9.42673	7.92437	Cysteine-rich hydrophobic domain 2 protein	CHIC2	Cysteine-rich hydrophobic domain 2 protein [Camponotus floridanus]	Cysteine-rich hydrophobic domain 2 protein OS=Homo sapiens GN=CHIC2 PE=1 SV=1	Cysteine-rich hydrophobic domain 2 protein OS=Camponotus floridanus GN=EAG_07897 PE=4 SV=1	NA	NA	IPR019383; Golgin subfamily A member 7/ERF4	NA
LOCMI00182	0.190242	0	0	0.233055	0	0.214172	Putative uncharacterized protein	LOCMI00182	PREDICTED: uncharacterized protein LOC100876583 [Megachile rotundata]	NA	Putative uncharacterized protein OS=Acromyrmex echinatior GN=G5I_09938 PE=4 SV=1	NA	GO:0046872; metal ion binding; Molecular Function	IPR007087; Zinc finger, C2H2 IPR015880; Zinc finger, C2H2-like	NA
LOCMI00183	1.14145	0.601331	11.3879	6.40902	9.88103	5.67556	LOCMI00183	LOCMI00183	LOCMI00183	LOCMI00183	LOCMI00183	LOCMI00183	LOCMI00183	LOCMI00183	LOCMI00183
LOCMI00184	0.380485	0	0	0	0	0	Putative odorant-binding protein A10	CSP	hypothetical protein [Locusta migratoria]	Putative odorant-binding protein A10 OS=Drosophila melanogaster GN=a10 PE=1 SV=2	Putative uncharacterized protein OS=Locusta migratoria PE=2 SV=1	NA	NA	IPR005055; Insect odorant-binding protein A10/Ejaculatory bulb-specific protein 3	NA
LOCMI00185	27.3949	20.4452	10.7622	11.7693	20.1028	17.3479	NA	LOCMI00185	PREDICTED: uncharacterized protein LOC100869373 [Apis florea]	NA	Uncharacterized protein OS=Nasonia vitripennis PE=4 SV=1	NA	NA	NA	NA
LOCMI00186	3.139	2.70599	2.37769	4.42805	5.79233	7.17477	TOX high mobility group box family member 3	Tox3	TOX high mobility group box family member 3, partial [Zootermopsis nevadensis]	TOX high mobility group box family member 3 OS=Rattus norvegicus GN=Tox3 PE=1 SV=1	Putative uncharacterized protein OS=Tribolium castaneum GN=TcasGA2_TC012723 PE=4 SV=1	COG5648|Chromatin-associated proteins containing the HMG domain|B|Chromatin structure and dynamics ;	NA	IPR009071; High mobility group box domain IPR014710; RmlC-like jelly roll fold	NA
LOCMI00188	0	0.150333	0.500566	0.349583	0	0	Eukaryotic translation initiation factor 2 subunit 2	eIF-2beta	eukaryotic translation initiation factor [Culex quinquefasciatus] gb|EDS35801.1| eukaryotic translation initiation factor [Culex quinquefasciatus]	Eukaryotic translation initiation factor 2 subunit 2 OS=Drosophila melanogaster GN=eIF-2beta PE=1 SV=1	Eukaryotic translation initiation factor OS=Culex quinquefasciatus GN=CpipJ_CPIJ011259 PE=4 SV=1	COG1601|Translation initiation factor 2, beta subunit (eIF-2beta)/eIF-5 N-terminal domain|J|Translation, ribosomal structure and biogenesis ;	GO:0003743; translation initiation factor activity; Molecular Function GO:0006413; translational initiation; Biological Process	IPR002735; Translation initiation factor IF2/IF5 IPR016189; Translation initiation factor IF2/IF5, N-terminal IPR016190; Translation initiation factor IF2/IF5, zinc-binding	NA
LOCMI00190	15.5047	5.56231	7.13307	20.3923	20.7842	14.7779	Probable phenylalanine--tRNA ligase alpha subunit	CG2263	PREDICTED: probable phenylalanine--tRNA ligase alpha subunit isoform X1 [Nasonia vitripennis]	Probable phenylalanine--tRNA ligase alpha subunit OS=Drosophila melanogaster GN=CG2263 PE=2 SV=1	Uncharacterized protein OS=Nasonia vitripennis PE=4 SV=1	COG0016|Phenylalanyl-tRNA synthetase alpha subunit|J|Translation, ribosomal structure and biogenesis ;	GO:0000049; tRNA binding; Molecular Function GO:0004812; aminoacyl-tRNA ligase activity; Molecular Function GO:0005524; ATP binding; Molecular Function GO:0005737; cytoplasm; Cellular Component GO:0043039; tRNA aminoacylation; Biological Process	IPR002319; Phenylalanyl-tRNA synthetase	K01889 FARSA, pheS; phenylalanyl-tRNA synthetase alpha chain [EC:6.1.1.20] [EC:6.1.1.20] Genetic Information Processing; Translation; Ribosome [BR:ko03011] Genetic Information Processing; Translation; Transfer RNA biogenesis [BR:ko03016] Genetic Information Processing; Translation; Aminoacyl-tRNA biosynthesis [PATH:ko00970]
LOCMI00191	22.4486	29.7659	37.7928	23.8882	29.5295	26.7715	Rab-like protein 3	rabl3	PREDICTED: rab-like protein 3-like [Megachile rotundata]	Rab-like protein 3 OS=Xenopus tropicalis GN=rabl3 PE=2 SV=1	Uncharacterized protein OS=Nasonia vitripennis PE=4 SV=1	NA	GO:0005525; GTP binding; Molecular Function GO:0007264; small GTPase mediated signal transduction; Biological Process	IPR001806; Small GTPase superfamily IPR027417; P-loop containing nucleoside triphosphate hydrolase	K07933
LOCMI00192	7.60969	1.35299	7.63364	3.84541	7.95025	3.53384	Golgin subfamily A member 1	GOLGA1	Golgin subfamily A member 1 [Harpegnathos saltator]	NA	Golgin subfamily A member 1 OS=Harpegnathos saltator GN=EAI_07492 PE=4 SV=1	NA	NA	NA	NA
LOCMI00193	0	0	1.00113	0	0	0	N-alpha-acetyltransferase 20	Naa20	unknown [Picea sitchensis]	N-alpha-acetyltransferase 20 OS=Mus musculus GN=Naa20 PE=2 SV=1	Putative uncharacterized protein OS=Picea sitchensis PE=2 SV=1	COG0456|Acetyltransferases|R|General function prediction only ;	NA	IPR016181; Acyl-CoA N-acyltransferase	NA
LOCMI00194	4.47069	3.15699	2.75312	3.02972	3.6344	6.1039	Pentatricopeptide repeat-containing protein 1, mitochondrial	Ptcd1	pentatricopeptide repeat protein 1 [Culex quinquefasciatus] gb|EDS31734.1| pentatricopeptide repeat protein 1 [Culex quinquefasciatus]	Pentatricopeptide repeat-containing protein 1, mitochondrial OS=Rattus norvegicus GN=Ptcd1 PE=2 SV=1	Pentatricopeptide repeat protein 1 OS=Culex quinquefasciatus GN=CpipJ_CPIJ000308 PE=4 SV=1	NA	NA	NA	K17710
LOCMI00195	29.3924	27.3606	27.2809	17.013	12.834	14.7779	LOCMI00195	LOCMI00195	LOCMI00195	LOCMI00195	LOCMI00195	LOCMI00195	LOCMI00195	LOCMI00195	LOCMI00195
LOCMI00197	5.42191	8.2683	8.88505	8.04041	6.24663	5.46139	Fumarylacetoacetase	FAH	PREDICTED: fumarylacetoacetase [Tribolium castaneum] gb|EFA06443.1| hypothetical protein TcasGA2_TC009325 [Tribolium castaneum]	Fumarylacetoacetase OS=Bos taurus GN=FAH PE=2 SV=1	Putative uncharacterized protein OS=Tribolium castaneum GN=TcasGA2_TC009325 PE=4 SV=1	COG0179|2-keto-4-pentenoate hydratase/2-oxohepta-3-ene-1,7-dioic acid hydratase (catechol pathway)|Q|Secondary metabolites biosynthesis, transport and catabolism ;	GO:0003824; catalytic activity; Molecular Function GO:0004334; fumarylacetoacetase activity; Molecular Function GO:0008152; metabolic process; Biological Process GO:0009072; aromatic amino acid family metabolic process; Biological Process	IPR002529; Fumarylacetoacetase, C-terminal IPR005959; Fumarylacetoacetase IPR011234; Fumarylacetoacetase, C-terminal-related	K01555 FAH, fahA; fumarylacetoacetase [EC:3.7.1.2] [EC:3.7.1.2] Metabolism; Amino acid metabolism; Tyrosine metabolism [PATH:ko00350] Metabolism; Xenobiotics biodegradation and metabolism; Styrene degradation [PATH:ko00643]
LOCMI00198	0	0	0	0	0	0.53543	LOCMI00198	LOCMI00198	LOCMI00198	LOCMI00198	LOCMI00198	LOCMI00198	LOCMI00198	LOCMI00198	LOCMI00198
LOCMI00200	0.665848	0.450998	0	0	0	0.749602	Fanconi anemia, complementation group D2	FANCD2	Fanconi anemia, complementation group D2 [Bombyx mori] dbj|BAK23266.1| Fanconi anemia, complementation group D2 [Bombyx mori]	NA	Fanconi anemia, complementation group D2 OS=Bombyx mori GN=FANCD2 PE=2 SV=1	NA	NA	NA	NA
LOCMI00201	0	0.150333	2.00227	0.116528	0.340725	0	NA	SCCPDH	saccharopine dehydrogenase [Sorangium cellulosum] ref|YP_001614366.1| hypothetical protein sce3726 [Sorangium cellulosum So ce56] emb|CAN93886.1| hypothetical protein sce3726 [Sorangium cellulosum So ce56]	NA	Uncharacterized protein OS=Sorangium cellulosum (strain So ce56) GN=sce3726 PE=4 SV=1	NA	NA	NA	NA
LOCMI00202	0	0	0	0.582638	0	0	Ac1147-like protein	LOCMI00202	PREDICTED: uncharacterized protein LOC100865369 isoform 1 [Apis florea] ref|XP_003698914.1| PREDICTED: uncharacterized protein LOC100865369 isoform 2 [Apis florea] ref|XP_003698915.1| PREDICTED: uncharacterized protein LOC100865369 isoform 3 [Apis florea] ref|XP_003698916.1| PREDICTED: uncharacterized protein LOC100865369 isoform 4 [Apis florea] ref|XP_003698917.1| PREDICTED: uncharacterized prot…	NA	Ac1147-like protein OS=Coptotermes formosanus PE=4 SV=1	NA	NA	NA	NA
LOCMI00203	0	0	0.250283	0.466111	0.22715	0.214172	Ubiquitin interacting motif	LOCMI00203	NA	NA	NA	NA	NA	IPR003903; Ubiquitin interacting motif	NA
LOCMI00204	19.595	21.7982	24.0272	15.6147	14.1969	13.3858	Ankyrin repeat domain-containing protein 40	Ankrd40	Ankyrin repeat domain-containing protein 40 [Zootermopsis nevadensis]	Ankyrin repeat domain-containing protein 40 OS=Mus musculus GN=Ankrd40 PE=1 SV=1	Putative ankyrin repeat-containing protein OS=Rhodnius prolixus PE=2 SV=1	NA	GO:0005515; protein binding; Molecular Function	IPR002110; Ankyrin repeat IPR020683; Ankyrin repeat-containing domain	NA
LOCMI00206	0	0	0	0	0.795025	0.749602	LOCMI00206	LOCMI00206	LOCMI00206	LOCMI00206	LOCMI00206	LOCMI00206	LOCMI00206	LOCMI00206	LOCMI00206
LOCMI00207	0.475606	0	2.75312	1.74791	0.22715	0.53543	DNA primase small subunit	DNApol-alpha50	DNA primase small subunit [Zootermopsis nevadensis]	DNA primase small subunit OS=Drosophila melanogaster GN=DNApol-alpha50 PE=2 SV=2	DNA primase OS=Daphnia pulex GN=DAPPUDRAFT_206450 PE=3 SV=1	COG1467|Eukaryotic-type DNA primase, catalytic (small) subunit|L|Replication, recombination and repair ;	GO:0003896; DNA primase activity; Molecular Function GO:0006269; DNA replication, synthesis of RNA primer; Biological Process	IPR002755; DNA primase, small subunit IPR014052; DNA primase, small subunit, eukaryotic/archaeal	K02684 PRI1; DNA primase small subunit [EC:2.7.7.-] [EC:2.7.7.-] Metabolism; Nucleotide metabolism; Purine metabolism [PATH:ko00230] Metabolism; Nucleotide metabolism; Pyrimidine metabolism [PATH:ko00240] Genetic Information Processing; Replication and repair; DNA replication [PATH:ko03030]
LOCMI00209	0.475606	0	0	0.582638	0	0.53543	Longitudinals lacking protein, isoforms A/B/D/L	lola	Longitudinals lacking protein, isoform G [Zootermopsis nevadensis]	Longitudinals lacking protein, isoforms A/B/D/L OS=Drosophila melanogaster GN=lola PE=1 SV=1	Uncharacterized protein OS=Rhodnius prolixus PE=4 SV=1	NA	GO:0046872; metal ion binding; Molecular Function	IPR007087; Zinc finger, C2H2 IPR015880; Zinc finger, C2H2-like	NA
LOCMI00210	4.28045	4.35965	3.62911	4.31152	5.11088	3.53384	Katanin p80 WD40 repeat-containing subunit B1	katnb1	Katanin p80 WD40-containing subunit B1 [Zootermopsis nevadensis]	Katanin p80 WD40 repeat-containing subunit B1 OS=Xenopus laevis GN=katnb1 PE=1 SV=1	Katanin p80 WD40 repeat-containing subunit B1 OS=Camponotus floridanus GN=KATNB1 PE=3 SV=1	COG2319|FOG: WD40 repeat|R|General function prediction only ;	GO:0005515; protein binding; Molecular Function GO:0008017; microtubule binding; Molecular Function GO:0008352; katanin complex; Cellular Component GO:0051013; microtubule severing; Biological Process	IPR001680; WD40 repeat IPR015943; WD40/YVTN repeat-like-containing domain IPR017986; WD40-repeat-containing domain IPR026962; Katanin p80 subunit B1	K18643
LOCMI00211	0	0	0	0	1.24933	0	LOCMI00211	LOCMI00211	LOCMI00211	LOCMI00211	LOCMI00211	LOCMI00211	LOCMI00211	LOCMI00211	LOCMI00211
LOCMI00212	0	0	0	0.233055	0	0	Dual 3',5'-cyclic-AMP and -GMP phosphodiesterase 11	Pde11	phosphodiesterase 9A [Xenopus laevis] gb|AAH99362.1| MGC116558 protein [Xenopus laevis]	Dual 3',5'-cyclic-AMP and -GMP phosphodiesterase 11 OS=Drosophila melanogaster GN=Pde11 PE=1 SV=4	MGC116558 protein OS=Xenopus laevis GN=pde9a PE=2 SV=1	NA	GO:0004114; 3',5'-cyclic-nucleotide phosphodiesterase activity; Molecular Function GO:0007165; signal transduction; Biological Process GO:0008081; phosphoric diester hydrolase activity; Molecular Function	IPR002073; 3'5'-cyclic nucleotide phosphodiesterase, catalytic domain IPR023088; 3'5'-cyclic nucleotide phosphodiesterase	NA
LOCMI00215	1.61706	0.901996	2.12741	1.63139	1.02218	1.17795	Beta-glucuronidase	GUSB	Beta-glucuronidase [Zootermopsis nevadensis]	Beta-glucuronidase OS=Canis familiaris GN=GUSB PE=1 SV=1	Beta-glucuronidase OS=Pararge aegeria PE=4 SV=1	COG3250|Beta-galactosidase/beta-glucuronidase|G|Carbohydrate transport and metabolism ;	GO:0004553; hydrolase activity, hydrolyzing O-glycosyl compounds; Molecular Function GO:0005975; carbohydrate metabolic process; Biological Process	IPR006103; Glycoside hydrolase, family 2, TIM barrel IPR013781; Glycoside hydrolase, catalytic domain IPR017853; Glycoside hydrolase, superfamily	NA
LOCMI00216	9.51212	9.47096	8.63477	8.50652	4.9973	5.78265	Phosphatidylethanolamine-binding protein homolog F40A3.3	F40A3.3	Phosphatidylethanolamine-binding protein 1 [Zootermopsis nevadensis]	Phosphatidylethanolamine-binding protein homolog F40A3.3 OS=Caenorhabditis elegans GN=F40A3.3 PE=3 SV=1	Putative phosphatidylethanolamine-binding protein OS=Corethrella appendiculata PE=2 SV=1	COG1881|Phospholipid-binding protein|R|General function prediction only ;	NA	IPR008914; Phosphatidylethanolamine-binding protein PEBP	NA
LOCMI00217	43.8509	51.4138	71.9564	38.8037	47.2472	22.4881	LOCMI00217	LOCMI00217	LOCMI00217	LOCMI00217	LOCMI00217	LOCMI00217	LOCMI00217	LOCMI00217	LOCMI00217
LOCMI00219	0	0	0	0	0	0	Ras suppressor protein 1	RSU1	hypothetical protein DICPUDRAFT_160203 [Dictyostelium purpureum] gb|EGC28408.1| hypothetical protein DICPUDRAFT_160203 [Dictyostelium purpureum]	Ras suppressor protein 1 OS=Bos taurus GN=RSU1 PE=2 SV=1	Putative uncharacterized protein OS=Dictyostelium purpureum GN=DICPUDRAFT_160203 PE=4 SV=1	COG4886|Leucine-rich repeat (LRR) protein|S|Function unknown ;	GO:0005515; protein binding; Molecular Function	IPR001611; Leucine-rich repeat IPR003591; Leucine-rich repeat, typical subtype IPR025875; Leucine rich repeat 4	NA
LOCMI00220	0.0951212	0	0	0.699166	0.113575	0.749602	Flap endonuclease GEN	Gen	PREDICTED: flap endonuclease GEN isoform X1 [Tribolium castaneum] gb|EFA08397.1| hypothetical protein TcasGA2_TC006044 [Tribolium castaneum]	Flap endonuclease GEN OS=Drosophila pseudoobscura pseudoobscura GN=Gen PE=3 SV=1	Putative uncharacterized protein OS=Tribolium castaneum GN=TcasGA2_TC006044 PE=4 SV=1	COG0258|5'-3' exonuclease (including N-terminal domain of PolI)|L|Replication, recombination and repair ;	GO:0003677; DNA binding; Molecular Function GO:0003824; catalytic activity; Molecular Function GO:0004518; nuclease activity; Molecular Function GO:0006281; DNA repair; Biological Process	IPR006084; XPG/Rad2 endonuclease IPR006085; XPG N-terminal IPR006086; XPG-I domain IPR008918; Helix-hairpin-helix motif, class 2	K15338
LOCMI00221	8.46578	9.1703	8.38449	7.80735	5.56518	7.28185	LOCMI00221	LOCMI00221	LOCMI00221	LOCMI00221	LOCMI00221	LOCMI00221	LOCMI00221	LOCMI00221	LOCMI00221
LOCMI00222	0	0	0.375425	0	0	0	Charged multivesicular body protein 2a homolog 2	chmp2a2	hypothetical protein VOLCADRAFT_81374 [Volvox carteri f. nagariensis] gb|EFJ47673.1| hypothetical protein VOLCADRAFT_81374 [Volvox carteri f. nagariensis]	Charged multivesicular body protein 2a homolog 2 OS=Dictyostelium discoideum GN=chmp2a2 PE=3 SV=1	Putative uncharacterized protein OS=Volvox carteri GN=VOLCADRAFT_81374 PE=4 SV=1	COG5491|Conserved protein implicated in secretion|N|Cell motility ;	GO:0015031; protein transport; Biological Process	IPR005024; Snf7	NA
LOCMI00223	87.2261	102.076	114.379	72.0141	81.6605	64.8941	Putative uncharacterized protein	LOCMI00223	conserved hypothetical protein [Pediculus humanus corporis] gb|EEB11629.1| conserved hypothetical protein [Pediculus humanus corporis]	NA	Putative uncharacterized protein OS=Pediculus humanus subsp. corporis GN=Phum_PHUM127920 PE=4 SV=1	NA	NA	NA	NA
LOCMI00224	2.94876	4.05898	2.37769	3.26277	3.40725	1.71338	Adenosine deaminase	Ada	Adenosine deaminase [Zootermopsis nevadensis]	Adenosine deaminase OS=Rattus norvegicus GN=Ada PE=1 SV=3	Adenosine deaminase, putative OS=Pediculus humanus subsp. corporis GN=Phum_PHUM124930 PE=4 SV=1	NA	GO:0009168; purine ribonucleoside monophosphate biosynthetic process; Biological Process GO:0019239; deaminase activity; Molecular Function	IPR001365; Adenosine/AMP deaminase domain	NA
LOCMI00225	1.52194	0	2.37769	2.56361	1.47648	2.35589	Protein SDA1 homolog	sdad1	SDA1-like protein [Zootermopsis nevadensis]	Protein SDA1 homolog OS=Nematostella vectensis GN=sdad1 PE=3 SV=1	Putative uncharacterized protein OS=Tribolium castaneum GN=TcasGA2_TC003433 PE=4 SV=1	NA	GO:0000055; ribosomal large subunit export from nucleus; Biological Process GO:0030036; actin cytoskeleton organization; Biological Process GO:0042273; ribosomal large subunit biogenesis; Biological Process	IPR012977; Uncharacterised domain NUC130/133, N-terminal IPR027312; Sda1	K14856
LOCMI00226	0	0	1.00113	0.233055	0	0	26S protease regulatory subunit 10B	psmC6	PREDICTED: 26S protease regulatory subunit 10B-like isoform 2 [Takifugu rubripes]	26S protease regulatory subunit 10B OS=Dictyostelium discoideum GN=psmC6 PE=1 SV=1	ATPase family associated protein OS=Musca domestica PE=2 SV=1	COG1222|ATP-dependent 26S proteasome regulatory subunit|O|Posttranslational modification, protein turnover, chaperones ;	GO:0005524; ATP binding; Molecular Function	IPR003959; ATPase, AAA-type, core IPR003960; ATPase, AAA-type, conserved site IPR027417; P-loop containing nucleoside triphosphate hydrolase	NA
LOCMI00227	0	0.150333	1.62684	0.116528	0	0	Lysine--tRNA ligase	Os03g0586800	PREDICTED: lysine--tRNA ligase isoform X2 [Nasonia vitripennis]	Lysine--tRNA ligase OS=Oryza sativa subsp. japonica GN=Os03g0586800 PE=2 SV=1	Lysine--tRNA ligase OS=Nasonia vitripennis PE=3 SV=1	COG1190|Lysyl-tRNA synthetase (class II)|J|Translation, ribosomal structure and biogenesis ;	GO:0000166; nucleotide binding; Molecular Function GO:0004812; aminoacyl-tRNA ligase activity; Molecular Function GO:0004824; lysine-tRNA ligase activity; Molecular Function GO:0005524; ATP binding; Molecular Function GO:0005737; cytoplasm; Cellular Component GO:0006418; tRNA aminoacylation for protein translation; Biological Process GO:0006430; lysyl-tRNA aminoacylation; Biological Process	IPR002313; Lysine-tRNA ligase, class II IPR004364; Aminoacyl-tRNA synthetase, class II (D/K/N) IPR006195; Aminoacyl-tRNA synthetase, class II IPR018149; Lysyl-tRNA synthetase, class II, C-terminal IPR018150; Aminoacyl-tRNA synthetase, class II (D/K/N)-like	K04567 KARS, lysS; lysyl-tRNA synthetase, class II [EC:6.1.1.6] [EC:6.1.1.6] Genetic Information Processing; Translation; Ribosome [BR:ko03011] Genetic Information Processing; Translation; Transfer RNA biogenesis [BR:ko03016] Genetic Information Processing; Translation; Aminoacyl-tRNA biosynthesis [PATH:ko00970]
LOCMI00228	83.231	81.1797	65.4491	41.8334	48.2694	46.3683	Pantothenate kinase 4	PANK4	hypothetical protein L798_13976, partial [Zootermopsis nevadensis]	Pantothenate kinase 4 OS=Pongo abelii GN=PANK4 PE=2 SV=1	Uncharacterized protein OS=Strigamia maritima PE=4 SV=1	COG5146|Pantothenate kinase, acetyl-CoA regulated|H|Coenzyme transport and metabolism ;	GO:0004594; pantothenate kinase activity; Molecular Function GO:0005524; ATP binding; Molecular Function GO:0015937; coenzyme A biosynthetic process; Biological Process	IPR002791; Domain of unknown function DUF89 IPR004567; Type II pantothenate kinase	K09680 coaW; type II pantothenate kinase [EC:2.7.1.33] [EC:2.7.1.33] Metabolism; Metabolism of cofactors and vitamins; Pantothenate and CoA biosynthesis [PATH:ko00770]
LOCMI00229	1.99754	1.80399	1.25142	1.86444	2.2715	0.642516	Nucleoporin Nup37	Nup37	Nucleoporin Nup37 [Zootermopsis nevadensis]	Nucleoporin Nup37 OS=Mus musculus GN=Nup37 PE=2 SV=2	Nucleoporin Nup37 OS=Medicago truncatula GN=MTR_005s0005 PE=4 SV=1	NA	GO:0005515; protein binding; Molecular Function	IPR001680; WD40 repeat IPR015943; WD40/YVTN repeat-like-containing domain IPR017986; WD40-repeat-containing domain IPR019775; WD40 repeat, conserved site	K14302 NUP37; nuclear pore complex protein Nup37 K14302 Genetic Information Processing; Translation; RNA transport [PATH:ko03013]
LOCMI00230	383.243	405.898	524.844	418.684	365.825	295.557	Translocon-associated protein subunit delta	SSR4	translocon-associated protein subunit delta-like (TRAP-delta) [Coptotermes formosanus]	Translocon-associated protein subunit delta OS=Bos taurus GN=SSR4 PE=2 SV=1	Translocon-associated protein subunit delta-like (TRAP-delta) OS=Coptotermes formosanus PE=2 SV=1	NA	GO:0005783; endoplasmic reticulum; Cellular Component GO:0016021; integral component of membrane; Cellular Component	IPR008855; Translocon-associated	K04571 SSR4; translocon-associated protein subunit delta K04571 Genetic Information Processing; Folding, sorting and degradation; Protein processing in endoplasmic reticulum [PATH:ko04141]
LOCMI00232	9.79748	10.0723	8.00906	1.2818	16.1277	6.21099	Ejaculatory bulb-specific protein 3	CSP	CSP precursor [Locusta migratoria]	Ejaculatory bulb-specific protein 3 OS=Drosophila melanogaster GN=PebIII PE=1 SV=2	CSP (Fragment) OS=Locusta migratoria PE=4 SV=1	NA	NA	IPR005055; Insect odorant-binding protein A10/Ejaculatory bulb-specific protein 3	NA
LOCMI00233	60.0215	60.4338	170.318	139.017	166.501	151.848	LOCMI00233	LOCMI00233	LOCMI00233	LOCMI00233	LOCMI00233	LOCMI00233	LOCMI00233	LOCMI00233	LOCMI00233
LOCMI00234	0	0	0.250283	0	0.22715	0.53543	NA	LOCMI00234	PREDICTED: uncharacterized protein LOC100570208 [Acyrthosiphon pisum]	NA	Uncharacterized protein OS=Acyrthosiphon pisum GN=LOC100570208 PE=4 SV=1	NA	NA	NA	NA
LOCMI00235	4.9463	2.85632	5.63137	5.70985	3.6344	5.67556	LOCMI00235	LOCMI00235	LOCMI00235	LOCMI00235	LOCMI00235	LOCMI00235	LOCMI00235	LOCMI00235	LOCMI00235
LOCMI00236	9.41699	4.66031	8.50963	10.371	9.88103	12.422	F-box/WD repeat-containing protein 5	FBXW5	F-box/WD repeat-containing protein 5 [Zootermopsis nevadensis]	NA	F-box/WD repeat-containing protein 5 OS=Camponotus floridanus GN=EAG_02927 PE=4 SV=1	NA	NA	NA	NA
LOCMI00237	0	0	0.250283	0	0	0	6-pyruvoyl tetrahydrobiopterin synthase	PTS	6-pyruvoyl tetrahydrobiopterin synthase, putative [Pediculus humanus corporis] gb|EEB12173.1| 6-pyruvoyl tetrahydrobiopterin synthase, putative [Pediculus humanus corporis]	6-pyruvoyl tetrahydrobiopterin synthase OS=Homo sapiens GN=PTS PE=1 SV=1	6-pyruvoyl tetrahydrobiopterin synthase OS=Pediculus humanus subsp. corporis GN=Phum_PHUM161370 PE=3 SV=1	NA	NA	IPR007115; 6-pyruvoyl tetrahydropterin synthase/QueD family protein	NA
LOCMI00238	2.28291	5.11131	5.75651	0.699166	0.68145	4.6047	Mediator of RNA polymerase II transcription subunit 14	MED14	Mediator of RNA polymerase II transcription subunit [Cerapachys biroi]	Mediator of RNA polymerase II transcription subunit 14 OS=Anopheles gambiae GN=MED14 PE=3 SV=5	Uncharacterized protein OS=Apis mellifera PE=4 SV=1	NA	GO:0001104; RNA polymerase II transcription cofactor activity; Molecular Function GO:0006357; regulation of transcription from RNA polymerase II promoter; Biological Process GO:0016592; mediator complex; Cellular Component	IPR013947; Mediator complex, subunit Med14	NA
LOCMI00239	0	0	0	8.15694	13.4019	16.17	LOCMI00239	LOCMI00239	LOCMI00239	LOCMI00239	LOCMI00239	LOCMI00239	LOCMI00239	LOCMI00239	LOCMI00239
LOCMI00240	0.570727	0	0	1.39833	0	1.4992	CD109 antigen, partial	CD109	CD109 antigen, partial [Zootermopsis nevadensis]	NA	AGAP008407-PA (Fragment) OS=Anopheles gambiae GN=TEP13 PE=4 SV=4	NA	NA	NA	NA
LOCMI00241	2.66339	1.80399	1.5017	1.39833	0	1.28503	LOCMI00241	LOCMI00241	LOCMI00241	LOCMI00241	LOCMI00241	LOCMI00241	LOCMI00241	LOCMI00241	LOCMI00241
LOCMI00242	0.570727	1.35299	0.500566	1.39833	1.24933	1.07086	Alkylated DNA repair protein alkB homolog 8	alkbh8	Alkylated DNA repair protein alkB-like protein 8 [Zootermopsis nevadensis]	Alkylated DNA repair protein alkB homolog 8 OS=Xenopus tropicalis GN=alkbh8 PE=2 SV=2	Uncharacterized protein OS=Monodelphis domestica GN=ALKBH8 PE=4 SV=2	COG3145|Alkylated DNA repair protein|L|Replication, recombination and repair ;	GO:0000166; nucleotide binding; Molecular Function GO:0003676; nucleic acid binding; Molecular Function GO:0016491; oxidoreductase activity; Molecular Function GO:0016706; oxidoreductase activity, acting on paired donors, with incorporation or reduction of molecular oxygen, 2-oxoglutarate as one donor, and incorporation of one atom each of oxygen into both donors; Molecular Function GO:0055114; o…	IPR000504; RNA recognition motif domain IPR005123; Oxoglutarate/iron-dependent dioxygenase IPR012677; Nucleotide-binding, alpha-beta plait IPR027450; Alpha-ketoglutarate-dependent dioxygenase AlkB-like	K10770
LOCMI00244	24.2559	35.1779	40.0453	22.2568	23.3965	18.5259	Innexin shaking-B	shakB	innexin 4 [Schistocerca gregaria]	Innexin shaking-B OS=Drosophila melanogaster GN=shakB PE=1 SV=3	Innexin OS=Schistocerca gregaria PE=2 SV=1	NA	GO:0005921; gap junction; Cellular Component	IPR000990; Innexin	NA
LOCMI00245	0.951212	0.300665	1.5017	1.39833	3.06653	2.89132	LOCMI00245	LOCMI00245	LOCMI00245	LOCMI00245	LOCMI00245	LOCMI00245	LOCMI00245	LOCMI00245	LOCMI00245
LOCMI00246	2.18779	3.45765	5.13081	3.96194	1.8172	2.14172	Sepiapterin reductase	SPR	Sepiapterin reductase [Zootermopsis nevadensis]	Sepiapterin reductase OS=Homo sapiens GN=SPR PE=1 SV=1	Uncharacterized protein OS=Rhodnius prolixus PE=4 SV=1	NA	GO:0008152; metabolic process; Biological Process GO:0016491; oxidoreductase activity; Molecular Function	IPR002198; Short-chain dehydrogenase/reductase SDR IPR016040; NAD(P)-binding domain	K00072 SPR; sepiapterin reductase [EC:1.1.1.153] [EC:1.1.1.153] Metabolism; Metabolism of cofactors and vitamins; Folate biosynthesis [PATH:ko00790]
LOCMI00247	0	1.20266	2.00227	0.466111	0	3.42675	Protein FAM49B	Fam49b	protein FAM49B, putative [Pediculus humanus corporis] gb|EEB19314.1| protein FAM49B, putative [Pediculus humanus corporis]	Protein FAM49B OS=Mus musculus GN=Fam49b PE=2 SV=1	Protein FAM49B, putative OS=Pediculus humanus subsp. corporis GN=Phum_PHUM566690 PE=4 SV=1	NA	NA	IPR009828; Protein of unknown function DUF1394	NA
LOCMI00248	0	0	0.375425	0.116528	0.340725	0	E3 ubiquitin-protein ligase MIB2	Mib2	PREDICTED: E3 ubiquitin-protein ligase MIB2 isoform X4 [Chrysemys picta bellii] ref|XP_008165518.1| PREDICTED: E3 ubiquitin-protein ligase MIB2 isoform X2 [Chrysemys picta bellii]	E3 ubiquitin-protein ligase MIB2 OS=Mus musculus GN=Mib2 PE=1 SV=2	E3 ubiquitin-protein ligase MIB2 OS=Chelonia mydas GN=UY3_16968 PE=4 SV=1	COG0666|FOG: Ankyrin repeat|R|General function prediction only ;	GO:0005515; protein binding; Molecular Function	IPR002110; Ankyrin repeat IPR020683; Ankyrin repeat-containing domain	NA
LOCMI00249	0	0	1.37656	0.466111	0	0	LOCMI00249	LOCMI00249	LOCMI00249	LOCMI00249	LOCMI00249	LOCMI00249	LOCMI00249	LOCMI00249	LOCMI00249
LOCMI00250	0	0	0	0	0.340725	0	Nuclear migration protein nudC	Nudc	unnamed protein product [Pneumocystis jirovecii]	Nuclear migration protein nudC OS=Mus musculus GN=Nudc PE=1 SV=1	I WGS project CAKM00000000 data, strain SE8, contig 103 OS=Pneumocystis jiroveci (strain SE8) GN=PNEJI1_003391 PE=4 SV=1	NA	NA	IPR008978; HSP20-like chaperone	NA
LOCMI00251	0	0	0	1.2818	1.24933	0.856688	Thioredoxin, mitochondrial	TXN2	hypothetical protein SINV_09075 [Solenopsis invicta]	Thioredoxin, mitochondrial OS=Bos taurus GN=TXN2 PE=1 SV=2	Thioredoxin (Fragment) OS=Solenopsis invicta GN=SINV_09075 PE=3 SV=1	COG0526|Thiol-disulfide isomerase and thioredoxins|OC|Posttranslational modification, protein turnover, chaperones ; Energy production and conversion ;	GO:0006662; glycerol ether metabolic process; Biological Process GO:0015035; protein disulfide oxidoreductase activity; Molecular Function GO:0045454; cell redox homeostasis; Biological Process	IPR005746; Thioredoxin IPR012336; Thioredoxin-like fold IPR013766; Thioredoxin domain	NA
LOCMI00253	1.61706	0.300665	1.87712	5.4768	4.20228	8.24563	Centrosomal protein of 19 kDa	cep19	hypothetical protein L798_03908 [Zootermopsis nevadensis]	Centrosomal protein of 19 kDa OS=Xenopus tropicalis GN=cep19 PE=2 SV=1	Putative uncharacterized protein OS=Ixodes scapularis GN=IscW_ISCW019097 PE=4 SV=1	NA	NA	NA	K16801
LOCMI00255	23.1144	16.0856	16.769	12.7015	11.2439	10.1732	Trafficking protein particle complex subunit 4	TRAPPC4	PREDICTED: trafficking protein particle complex subunit 4 [Tribolium castaneum] gb|EFA01590.1| hypothetical protein TcasGA2_TC007153 [Tribolium castaneum]	Trafficking protein particle complex subunit 4 OS=Pongo abelii GN=TRAPPC4 PE=2 SV=1	Putative uncharacterized protein GLEAN_07153 OS=Tribolium castaneum GN=GLEAN_07153 PE=4 SV=1	COG5122|Transport protein particle (TRAPP) complex subunit|U|Intracellular trafficking, secretion, and vesicular transport ;	GO:0005801; cis-Golgi network; Cellular Component GO:0006810; transport; Biological Process GO:0006888; ER to Golgi vesicle-mediated transport; Biological Process	IPR007233; Sybindin-like protein IPR011012; Longin-like domain	NA
LOCMI00257	0	0.601331	0	1.51486	0	2.24881	LOCMI00257	LOCMI00257	LOCMI00257	LOCMI00257	LOCMI00257	LOCMI00257	LOCMI00257	LOCMI00257	LOCMI00257
LOCMI00258	90.0797	150.934	125.142	82.385	102.445	98.8404	Dynamin-like 120 kDa protein, mitochondrial	opa1	Dynamin-like 120 kDa protein, mitochondrial [Camponotus floridanus]	Dynamin-like 120 kDa protein, mitochondrial OS=Danio rerio GN=opa1 PE=2 SV=1	Dynamin-like protein OS=Apis cerana GN=ACCB01324.1 PE=2 SV=1	COG0699|Predicted GTPases (dynamin-related)|R|General function prediction only ;	GO:0003924; GTPase activity; Molecular Function GO:0005525; GTP binding; Molecular Function GO:0005739; mitochondrion; Cellular Component GO:0006915; apoptotic process; Biological Process GO:0008053; mitochondrial fusion; Biological Process	IPR001401; Dynamin, GTPase domain IPR022812; Dynamin superfamily IPR027417; P-loop containing nucleoside triphosphate hydrolase IPR027740; Dynamin-like 120kDa protein, mitochondrial	NA
LOCMI00259	0.285363	0	0	0	0	0	NA	LOCMI00259	NA	NA	Uncharacterized protein OS=Acyrthosiphon pisum PE=4 SV=1	NA	NA	NA	NA
LOCMI00260	3.80485	1.95433	12.6393	1.51486	6.13305	2.67715	Ankyrin repeat domain-containing protein 2	Ankrd2	Chain A, Crystal Structure Of Engineered Protein. Northeast Structural Genomics Consortium Target Or266. pdb|4GMR|B Chain B, Crystal Structure Of Engineered Protein. Northeast Structural Genomics Consortium Target Or266.	Ankyrin repeat domain-containing protein 2 OS=Mus musculus GN=Ankrd2 PE=1 SV=3	Ankyrin OS=Sulfolobus islandicus (strain Y.N.15.51 / Yellowstone #2) GN=YN1551_2013 PE=4 SV=1	COG0666|FOG: Ankyrin repeat|R|General function prediction only ;	GO:0005515; protein binding; Molecular Function	IPR002110; Ankyrin repeat IPR020683; Ankyrin repeat-containing domain	NA
LOCMI00261	2.75851	0.751664	3.25368	1.16528	2.95295	1.39212	MADF domain	LOCMI00261	PREDICTED: uncharacterized protein LOC101743720 [Bombyx mori]	NA	Uncharacterized protein OS=Acyrthosiphon pisum PE=4 SV=1	NA	NA	IPR006578; MADF domain	NA
LOCMI00262	7.22921	3.60799	7.13307	5.36027	7.15523	6.31808	Arrestin domain-containing protein 3	ARRDC3	CG1105 [Drosophila melanogaster] gb|AAF54075.1| CG1105 [Drosophila melanogaster] gb|AAM50825.1| LD44267p [Drosophila melanogaster] gb|ACL85974.1| CG1105-PA, partial [synthetic construct] gb|ACL90747.1| CG1105-PA [synthetic construct]	Arrestin domain-containing protein 3 OS=Pongo abelii GN=ARRDC3 PE=2 SV=1	Uncharacterized protein OS=Rhodnius prolixus PE=4 SV=1	NA	NA	IPR011021; Arrestin-like, N-terminal IPR014756; Immunoglobulin E-set	NA
LOCMI00263	1.71218	1.20266	1.25142	1.16528	1.13575	2.46298	GPI mannosyltransferase 4	pigm	GPI mannosyltransferase 4 [Zootermopsis nevadensis]	GPI mannosyltransferase 4 OS=Drosophila melanogaster GN=CG45068 PE=2 SV=1	GH20992 OS=Drosophila grimshawi GN=Dgri\GH20992 PE=4 SV=1	NA	NA	NA	NA
LOCMI00264	0	0	0	0.466111	0	0	Centrosomal protein of 135 kDa	Cep135	Centrosomal protein of 135 kDa [Zootermopsis nevadensis]	Centrosomal protein of 135 kDa OS=Mus musculus GN=Cep135 PE=1 SV=1	Uncharacterized protein OS=Ficedula albicollis GN=CEP135 PE=4 SV=1	NA	NA	NA	NA
LOCMI00267	0.380485	0.150333	0	0.466111	0.340725	0.642516	Structural maintenance of chromosomes protein 4	SMC4	structural maintenance of chromosomes protein [Hymenolepis microstoma]	Structural maintenance of chromosomes protein 4 OS=Homo sapiens GN=SMC4 PE=1 SV=2	Structural maintenance of chromosomes protein OS=Hymenolepis microstoma GN=HmN_000056700 PE=3 SV=1	COG1196|Chromosome segregation ATPases|D|Cell cycle control, cell division, chromosome partitioning ;	NA	IPR003395; RecF/RecN/SMC, N-terminal IPR027417; P-loop containing nucleoside triphosphate hydrolase	NA
LOCMI00269	0	0	0	0	0	0.214172	Eukaryotic translation initiation factor 1A	eif1a	translation initiation factor 4C [Capsaspora owczarzaki ATCC 30864] gb|EFW45355.1| translation initiation factor 4C [Capsaspora owczarzaki ATCC 30864]	Eukaryotic translation initiation factor 1A OS=Dictyostelium discoideum GN=eif1a PE=3 SV=1	Translation initiation factor 4C OS=Capsaspora owczarzaki (strain ATCC 30864) GN=CAOG_03361 PE=3 SV=1	COG0361|Translation initiation factor 1 (IF-1)|J|Translation, ribosomal structure and biogenesis ;	GO:0003723; RNA binding; Molecular Function GO:0003743; translation initiation factor activity; Molecular Function GO:0006413; translational initiation; Biological Process	IPR001253; Translation initiation factor 1A (eIF-1A) IPR006196; RNA-binding domain, S1, IF1 type IPR012340; Nucleic acid-binding, OB-fold IPR018104; Translation initiation factor 1A (eIF-1A), conserved site	NA
LOCMI00270	3.99509	3.15699	0.375425	0.815694	5.9059	2.24881	LOCMI00270	LOCMI00270	LOCMI00270	LOCMI00270	LOCMI00270	LOCMI00270	LOCMI00270	LOCMI00270	LOCMI00270
LOCMI00271	4.56582	2.10466	0.875991	4.77763	1.59005	1.82046	LOCMI00271	LOCMI00271	LOCMI00271	LOCMI00271	LOCMI00271	LOCMI00271	LOCMI00271	LOCMI00271	LOCMI00271
LOCMI00272	1.71218	1.20266	1.87712	0.932221	4.31585	2.24881	Inositol polyphosphate 1-phosphatase	Inpp1	Inositol polyphosphate 1-phosphatase [Zootermopsis nevadensis]	Inositol polyphosphate 1-phosphatase OS=Mus musculus GN=Inpp1 PE=1 SV=2	Uncharacterized protein OS=Apis mellifera GN=Ipp PE=4 SV=1	NA	GO:0046854; phosphatidylinositol phosphorylation; Biological Process	IPR000760; Inositol monophosphatase	K01107 INPP1; inositol polyphosphate 1-phosphatase [EC:3.1.3.57] [EC:3.1.3.57] Metabolism; Carbohydrate metabolism; Inositol phosphate metabolism [PATH:ko00562] Environmental Information Processing; Signal transduction; Phosphatidylinositol signaling system [PATH:ko04070]
LOCMI00274	73.9091	92.154	126.018	95.7857	80.184	65.1083	3-hydroxyacyl-CoA dehydrogenase type-2	scu	hydroxyacyl dehydrogenase [Coptotermes formosanus]	3-hydroxyacyl-CoA dehydrogenase type-2 OS=Drosophila melanogaster GN=scu PE=1 SV=1	Hydroxyacyl dehydrogenase OS=Coptotermes formosanus PE=2 SV=1	COG1028|Dehydrogenases with different specificities (related to short-chain alcohol dehydrogenases)|IQR|Lipid transport and metabolism ; Secondary metabolites biosynthesis, transport and catabolism ; General function prediction only ;	GO:0008152; metabolic process; Biological Process GO:0016491; oxidoreductase activity; Molecular Function	IPR002198; Short-chain dehydrogenase/reductase SDR IPR002347; Glucose/ribitol dehydrogenase IPR016040; NAD(P)-binding domain IPR020904; Short-chain dehydrogenase/reductase, conserved site	K08683 HSD17B10; 3-hydroxyacyl-CoA dehydrogenase / 3-hydroxy-2-methylbutyryl-CoA dehydrogenase [EC:1.1.1.35 1.1.1.178] [EC:1.1.1.35 1.1.1.178] Metabolism; Amino acid metabolism; Valine, leucine and isoleucine degradation [PATH:ko00280] Human Diseases; Neurodegenerative diseases; Alzheimer's disease [PATH:ko05010]
LOCMI00276	0	0	0	0	0	0	LOCMI00276	LOCMI00276	LOCMI00276	LOCMI00276	LOCMI00276	LOCMI00276	LOCMI00276	LOCMI00276	LOCMI00276
LOCMI00278	0	0	0	0	0	0	Replication factor C subunit 2	RFC2	PREDICTED: replication factor C subunit 2 isoform X2 [Latimeria chalumnae]	Replication factor C subunit 2 OS=Gallus gallus GN=RFC2 PE=2 SV=1	Uncharacterized protein OS=Latimeria chalumnae PE=4 SV=1	COG0470|ATPase involved in DNA replication|L|Replication, recombination and repair ;	GO:0003677; DNA binding; Molecular Function GO:0006260; DNA replication; Biological Process	IPR008921; DNA polymerase III, clamp loader complex, gamma/delta/delta subunit, C-terminal IPR013748; Replication factor C, C-terminal domain IPR027417; P-loop containing nucleoside triphosphate hydrolase	K04801
LOCMI00279	13.6023	8.7193	4.37996	5.4768	5.67875	6.21099	LOCMI00279	LOCMI00279	LOCMI00279	LOCMI00279	LOCMI00279	LOCMI00279	LOCMI00279	LOCMI00279	LOCMI00279
LOCMI00280	3.80485	5.41198	5.25595	6.29249	6.13305	4.49761	E3 UFM1-protein ligase 1 homolog	ufl-1	hypothetical protein L798_05369 [Zootermopsis nevadensis]	E3 UFM1-protein ligase 1 homolog OS=Anopheles gambiae GN=AGAP007742 PE=3 SV=3	Uncharacterized protein OS=Rhipicephalus pulchellus PE=2 SV=1	NA	NA	NA	NA
LOCMI00281	0	0	0	0	0	0	Protein arginine N-methyltransferase 1.1	PRMT11	hypothetical protein JCGZ_07313 [Jatropha curcas]	Protein arginine N-methyltransferase 1.1 OS=Arabidopsis thaliana GN=PRMT11 PE=1 SV=1	Uncharacterized protein OS=Citrus clementina GN=CICLE_v10008497mg PE=4 SV=1	COG0500|SAM-dependent methyltransferases|QR|Secondary metabolites biosynthesis, transport and catabolism ; General function prediction only ;	GO:0006479; protein methylation; Biological Process GO:0008168; methyltransferase activity; Molecular Function	IPR025799; Protein arginine N-methyltransferase	NA
LOCMI00282	0	0.300665	0.250283	0	0.22715	0.428344	Fizzy-related protein homolog	Fzr1	Fizzy-related protein-like protein [Harpegnathos saltator]	Fizzy-related protein homolog OS=Mus musculus GN=Fzr1 PE=1 SV=1	Fizzy-related protein-like protein OS=Harpegnathos saltator GN=EAI_11629 PE=4 SV=1	COG2319|FOG: WD40 repeat|R|General function prediction only ;	GO:0005515; protein binding; Molecular Function	IPR001680; WD40 repeat IPR015943; WD40/YVTN repeat-like-containing domain IPR017986; WD40-repeat-containing domain IPR019775; WD40 repeat, conserved site	K03364 CDH1; cell division cycle 20-like protein 1, cofactor of APC complex K03364 Genetic Information Processing; Folding, sorting and degradation; SNAREs [BR:ko04131] Genetic Information Processing; Folding, sorting and degradation; Ubiquitin mediated proteolysis [PATH:ko04120] Cellular Processes; Cell growth and death; Cell cycle [PATH:ko04110] Cellular Processes; Cell growth and death; Cell c…
LOCMI00283	0	0	0	0	0	0	Vacuolar protein-sorting-associated protein 36	VPS36	vacuolar protein-sorting-associated protein 36 [Capsaspora owczarzaki ATCC 30864] gb|EFW47393.1| vacuolar protein-sorting-associated protein 36 [Capsaspora owczarzaki ATCC 30864]	Vacuolar protein-sorting-associated protein 36 OS=Bos taurus GN=VPS36 PE=2 SV=1	Vacuolar protein-sorting-associated protein 36 OS=Capsaspora owczarzaki (strain ATCC 30864) GN=CAOG_05337 PE=4 SV=1	NA	NA	IPR007286; EAP30 IPR011991; Winged helix-turn-helix DNA-binding domain	NA
LOCMI00284	0.285363	0	3.87939	1.16528	0.795025	0	Ubiquitin conjugating enzyme E2 B	ubcB	ubiquitin-conjugating enzyme E2 [Dictyostelium discoideum AX4] sp|Q94490.1|UBCB_DICDI RecName: Full=Ubiquitin conjugating enzyme E2 B; AltName: Full=UBC1 [Dictyostelium discoideum] gb|AAB08700.1| UbcB [Dictyostelium discoideum] gb|EAL64896.1| ubiquitin-conjugating enzyme E2 [Dictyostelium discoideum AX4]	Ubiquitin conjugating enzyme E2 B OS=Dictyostelium discoideum GN=ubcB PE=1 SV=1	Ubiquitin-conjugating enzyme E2 OS=Polysphondylium pallidum GN=ubcB PE=4 SV=1	COG5078|Ubiquitin-protein ligase|O|Posttranslational modification, protein turnover, chaperones ;	GO:0016881; acid-amino acid ligase activity; Molecular Function	IPR000608; Ubiquitin-conjugating enzyme, E2 IPR016135; Ubiquitin-conjugating enzyme/RWD-like	NA
LOCMI00286	4.66094	3.75832	4.75538	3.96194	2.49865	3.31967	Probable multidrug resistance-associated protein lethal(2)03659	ABCC2	hypothetical protein YQE_05446, partial [Dendroctonus ponderosae]	Probable multidrug resistance-associated protein lethal(2)03659 OS=Drosophila melanogaster GN=l(2)03659 PE=2 SV=3	Uncharacterized protein (Fragment) OS=Dendroctonus ponderosae GN=YQE_05446 PE=3 SV=1	NA	NA	IPR027417; P-loop containing nucleoside triphosphate hydrolase	NA
LOCMI00287	6.37312	4.05898	5.00566	2.68014	4.77015	11.1369	Titin	sls	conserved hypothetical protein [Pediculus humanus corporis] gb|EEB18956.1| conserved hypothetical protein [Pediculus humanus corporis]	Titin OS=Drosophila melanogaster GN=sls PE=1 SV=3	Putative uncharacterized protein OS=Pediculus humanus subsp. corporis GN=Phum_PHUM541090 PE=4 SV=1	NA	GO:0005515; protein binding; Molecular Function	IPR003598; Immunoglobulin subtype 2 IPR003599; Immunoglobulin subtype IPR007110; Immunoglobulin-like domain IPR013098; Immunoglobulin I-set IPR013783; Immunoglobulin-like fold	NA
LOCMI00288	1.90242	0.901996	0.375425	7.69082	1.59005	7.60311	Constitutive coactivator of peroxisome proliferator-activated receptor gamma	Fam120b	Constitutive coactivator of peroxisome proliferator-activated receptor gamma [Zootermopsis nevadensis]	Constitutive coactivator of peroxisome proliferator-activated receptor gamma OS=Mus musculus GN=Fam120b PE=1 SV=1	Constitutive coactivator of peroxisome proliferator-activated receptor gamma OS=Crotalus horridus PE=2 SV=1	NA	NA	NA	NA
LOCMI00289	0	0.300665	0.250283	0	0	0.214172	LOCMI00289	LOCMI00289	LOCMI00289	LOCMI00289	LOCMI00289	LOCMI00289	LOCMI00289	LOCMI00289	LOCMI00289
LOCMI00290	0.0951212	0	0	0.233055	0.113575	0.53543	Peptidase A2A, retrovirus RVP subgroup Aspartic peptidase domain	LOCMI00290	hypothetical protein TcasGA2_TC016048 [Tribolium castaneum]	NA	Uncharacterized protein OS=Acyrthosiphon pisum PE=4 SV=1	NA	NA	IPR018061; Peptidase A2A, retrovirus RVP subgroup IPR021109; Aspartic peptidase domain	NA
LOCMI00291	0.190242	0	0	0	0	0	LOCMI00291	LOCMI00291	LOCMI00291	LOCMI00291	LOCMI00291	LOCMI00291	LOCMI00291	LOCMI00291	LOCMI00291
LOCMI00292	11.6048	7.51664	6.25708	11.7693	14.424	14.6708	Dual specificity protein phosphatase 19	Dusp19	hypothetical protein L798_02013 [Zootermopsis nevadensis]	Dual specificity protein phosphatase 19 OS=Mus musculus GN=Dusp19 PE=2 SV=1	tRNA pseudouridine synthase OS=Rhodnius prolixus PE=3 SV=1	COG2453|Predicted protein-tyrosine phosphatase|T|Signal transduction mechanisms ;	GO:0006470; protein dephosphorylation; Biological Process GO:0008138; protein tyrosine/serine/threonine phosphatase activity; Molecular Function GO:0016311; dephosphorylation; Biological Process GO:0016791; phosphatase activity; Molecular Function	IPR000340; Dual specificity phosphatase, catalytic domain IPR000387; Protein-tyrosine/Dual specificity phosphatase IPR020422; Dual specificity phosphatase, subgroup, catalytic domain IPR024950; Dual specificity phosphatase	K14165
LOCMI00293	14.2682	9.77163	12.5142	17.7122	15.3326	18.633	Dynactin subunit 6	Dctn6	Dynactin subunit 6 [Zootermopsis nevadensis]	Dynactin subunit 6 OS=Mus musculus GN=Dctn6 PE=1 SV=1	Dynactin subunit 6 1 OS=Micrurus fulvius PE=2 SV=1	NA	GO:0005869; dynactin complex; Cellular Component	IPR001451; Bacterial transferase hexapeptide repeat IPR011004; Trimeric LpxA-like IPR027777; Dynactin subunit 6	K10428 DCTN6; dynactin 6 K10428 Organismal Systems; Excretory system; Vasopressin-regulated water reabsorption [PATH:ko04962]
LOCMI00294	10.4633	6.31397	10.2616	11.1867	9.65388	11.0299	Hypoxia-inducible factor 1-alpha inhibitor	HIF1AN	Hypoxia-inducible factor 1-alpha inhibitor [Zootermopsis nevadensis]	Hypoxia-inducible factor 1-alpha inhibitor OS=Homo sapiens GN=HIF1AN PE=1 SV=2	Hypoxia-inducible factor 1 alpha inhibitor, putative OS=Pediculus humanus subsp. corporis GN=Phum_PHUM407820 PE=4 SV=1	NA	NA	NA	K18055
LOCMI00295	6.08775	6.46431	6.0068	6.05944	4.31585	5.24722	E3 ubiquitin-protein ligase CBL	Cbl	E3 ubiquitin-protein ligase CBL, putative [Pediculus humanus corporis] gb|EEB15887.1| E3 ubiquitin-protein ligase CBL, putative [Pediculus humanus corporis]	E3 ubiquitin-protein ligase CBL OS=Mus musculus GN=Cbl PE=1 SV=3	E3 ubiquitin-protein ligase CBL, putative OS=Pediculus humanus subsp. corporis GN=Phum_PHUM394550 PE=4 SV=1	NA	GO:0001784; phosphotyrosine binding; Molecular Function GO:0004842; ubiquitin-protein transferase activity; Molecular Function GO:0004871; signal transducer activity; Molecular Function GO:0005509; calcium ion binding; Molecular Function GO:0005515; protein binding; Molecular Function GO:0005634; nucleus; Cellular Component GO:0007166; cell surface receptor signaling pathway; Biological Process G…	IPR000980; SH2 domain IPR001841; Zinc finger, RING-type IPR003153; Adaptor protein Cbl, N-terminal helical IPR011992; EF-hand domain pair IPR013083; Zinc finger, RING/FYVE/PHD-type IPR014741; Adaptor protein Cbl, EF hand-like IPR014742; Adaptor protein Cbl, SH2-like IPR017907; Zinc finger, RING-type, conserved site IPR024159; Adaptor protein Cbl, PTB domain IPR024162; Adaptor protein Cbl	K04707 CBL; E3 ubiquitin-protein ligase CBL [EC:6.3.2.19] [EC:6.3.2.19] Genetic Information Processing; Folding, sorting and degradation; SNAREs [BR:ko04131] Genetic Information Processing; Folding, sorting and degradation; Ubiquitin mediated proteolysis [PATH:ko04120] Environmental Information Processing; Signal transduction; ErbB signaling pathway [PATH:ko04012] Environmental Information Proces…
LOCMI00297	23.6852	33.6745	29.4083	13.7503	9.54031	13.1716	Carboxypeptidase Q	Cpq	PREDICTED: carboxypeptidase Q isoform X1 [Tribolium castaneum] gb|EFA11805.1| hypothetical protein TcasGA2_TC008584 [Tribolium castaneum]	Carboxypeptidase Q OS=Mus musculus GN=Cpq PE=2 SV=1	Putative uncharacterized protein OS=Tribolium castaneum GN=TcasGA2_TC008584 PE=4 SV=1	NA	NA	NA	NA
LOCMI00298	9.8926	17.1379	12.0136	11.6528	9.08601	8.99523	26S proteasome non-ATPase regulatory subunit 10	Psmd10	PREDICTED: 26S proteasome non-ATPase regulatory subunit 10-like [Megachile rotundata]	26S proteasome non-ATPase regulatory subunit 10 OS=Mus musculus GN=Psmd10 PE=1 SV=3	Uncharacterized protein OS=Apis mellifera GN=Prosalpha5 PE=4 SV=1	COG0666|FOG: Ankyrin repeat|R|General function prediction only ;	GO:0005515; protein binding; Molecular Function	IPR002110; Ankyrin repeat IPR020683; Ankyrin repeat-containing domain	K06694
LOCMI00299	0	0	0.250283	0.699166	0.567875	0	Protein MEMO1 homolog	memo1	hypothetical protein VOLCADRAFT_99750 [Volvox carteri f. nagariensis] gb|EFJ40486.1| hypothetical protein VOLCADRAFT_99750 [Volvox carteri f. nagariensis]	Protein MEMO1 homolog OS=Dictyostelium discoideum GN=memo1 PE=3 SV=1	Putative uncharacterized protein OS=Volvox carteri GN=VOLCADRAFT_99750 PE=3 SV=1	COG1355|Predicted dioxygenase|R|General function prediction only ;	NA	IPR002737; MEMO1 family	NA
LOCMI00300	3.42436	6.61464	6.13194	2.44708	2.15793	2.57007	HMG domain-containing protein 4	HMGXB4	HMG domain-containing protein 4 [Zootermopsis nevadensis]	HMG domain-containing protein 4 OS=Homo sapiens GN=HMGXB4 PE=1 SV=2	HMG box-containing protein 4 OS=Pararge aegeria PE=4 SV=1	NA	NA	IPR009071; High mobility group box domain	K11298
LOCMI00301	1620.86	2604.21	3068.6	1650.96	1750.08	1490.42	Phosphate carrier protein, mitochondrial	Slc25a3	Phosphate carrier protein, mitochondrial [Zootermopsis nevadensis]	Phosphate carrier protein, mitochondrial OS=Mus musculus GN=Slc25a3 PE=1 SV=1	Putative mitochondrial carrier protein OS=Rhodnius prolixus PE=2 SV=1	NA	NA	IPR018108; Mitochondrial substrate/solute carrier IPR023395; Mitochondrial carrier domain	K15102
LOCMI00302	0	0	0.250283	0	0.22715	0	Uncharacterized protein B0495.7	B0495.7	Endoplasmic reticulum metallopeptidase 1 [Zootermopsis nevadensis]	Uncharacterized protein B0495.7 OS=Caenorhabditis elegans GN=B0495.7 PE=1 SV=2	Endoplasmic reticulum metallopeptidase 1 OS=Crassostrea gigas GN=CGI_10010185 PE=4 SV=1	COG2234|Predicted aminopeptidases|R|General function prediction only ;	NA	NA	NA
LOCMI00304	0.0951212	0	0.375425	1.63139	0.340725	0.642516	Succinate dehydrogenase [ubiquinone] iron-sulfur subunit, mitochondrial	sdhB	succinate dehydrogenase [Dictyostelium discoideum AX4] sp|Q55CC2.1|SDHB_DICDI RecName: Full=Succinate dehydrogenase [ubiquinone] iron-sulfur subunit, mitochondrial; AltName: Full=Iron-sulfur subunit of complex II; Short=Ip; Flags: Precursor [Dictyostelium discoideum] gb|EAL72410.1| succinate dehydrogenase [Dictyostelium discoideum AX4]	Succinate dehydrogenase [ubiquinone] iron-sulfur subunit, mitochondrial OS=Dictyostelium discoideum GN=sdhB PE=3 SV=1	Succinate dehydrogenase OS=Dictyostelium purpureum GN=DICPUDRAFT_93700 PE=4 SV=1	COG0479|Succinate dehydrogenase/fumarate reductase, Fe-S protein subunit|C|Energy production and conversion ;	GO:0006099; tricarboxylic acid cycle; Biological Process GO:0009055; electron carrier activity; Molecular Function GO:0016491; oxidoreductase activity; Molecular Function GO:0051536; iron-sulfur cluster binding; Molecular Function GO:0051537; 2 iron, 2 sulfur cluster binding; Molecular Function GO:0055114; oxidation-reduction process; Biological Process	IPR001041; 2Fe-2S ferredoxin-type domain IPR004489; Succinate dehydrogenase/fumarate reductase iron-sulphur protein IPR006058; 2Fe-2S ferredoxin, iron-sulphur binding site IPR009051; Alpha-helical ferredoxin IPR012675; Beta-grasp domain IPR017896; 4Fe-4S ferredoxin-type, iron-sulpur binding domain IPR017900; 4Fe-4S ferredoxin, iron-sulphur binding, conserved site IPR025192; Succinate dehydogenase…	K00240 sdhB; succinate dehydrogenase iron-sulfur subunit [EC:1.3.5.1] [EC:1.3.5.1] Metabolism; Overview; Carbon metabolism [PATH:ko01200] Metabolism; Carbohydrate metabolism; Citrate cycle (TCA cycle) [PATH:ko00020] Metabolism; Carbohydrate metabolism; Butanoate metabolism [PATH:ko00650] Metabolism; Energy metabolism; Oxidative phosphorylation [PATH:ko00190] Metabolism; Energy metabolism; Carbon …
LOCMI00306	1.99754	3.75832	2.12741	1.39833	2.38508	0	Charged multivesicular body protein 5	Chmp5	PREDICTED: charged multivesicular body protein 5-like [Megachile rotundata]	Charged multivesicular body protein 5 OS=Drosophila melanogaster GN=CG6259 PE=1 SV=2	AAEL005797-PA OS=Aedes aegypti GN=AAEL005797 PE=2 SV=1	NA	GO:0015031; protein transport; Biological Process	IPR005024; Snf7	NA
LOCMI00307	0.380485	3.00665	0.500566	3.84541	2.2715	3.53384	LOCMI00307	LOCMI00307	LOCMI00307	LOCMI00307	LOCMI00307	LOCMI00307	LOCMI00307	LOCMI00307	LOCMI00307
LOCMI00309	0	0	0.875991	0.349583	1.59005	2.57007	Large neutral amino acids transporter small subunit 2	Slc7a8	large neutral amino acids transporter, putative [Pediculus humanus corporis] gb|EEB10585.1| large neutral amino acids transporter, putative [Pediculus humanus corporis]	Large neutral amino acids transporter small subunit 2 OS=Mus musculus GN=Slc7a8 PE=1 SV=1	Large neutral amino acids transporter, putative OS=Pediculus humanus subsp. corporis GN=Phum_PHUM050830 PE=4 SV=1	NA	GO:0003333; amino acid transmembrane transport; Biological Process GO:0015171; amino acid transmembrane transporter activity; Molecular Function GO:0016020; membrane; Cellular Component	IPR002293; Amino acid/polyamine transporter I	NA
LOCMI00310	54.2191	52.7668	54.3115	54.6515	35.8897	44.6549	Clathrin heavy chain 1	CLTC	clathrin, partial [Locusta migratoria]	Clathrin heavy chain 1 OS=Homo sapiens GN=CLTC PE=1 SV=5	Clathrin (Fragment) OS=Locusta migratoria PE=2 SV=1	NA	GO:0005488; binding; Molecular Function GO:0006886; intracellular protein transport; Biological Process GO:0016192; vesicle-mediated transport; Biological Process	IPR000547; Clathrin, heavy chain/VPS, 7-fold repeat IPR016024; Armadillo-type fold	NA
LOCMI00311	3.139	1.80399	1.5017	1.86444	1.3629	2.14172	Developmentally-regulated GTP-binding protein 2	Drg2	Developmentally-regulated GTP-binding protein 2 [Zootermopsis nevadensis]	Developmentally-regulated GTP-binding protein 2 OS=Mus musculus GN=Drg2 PE=1 SV=1	Uncharacterized protein (Fragment) OS=Dendroctonus ponderosae GN=D910_00451 PE=4 SV=1	COG1163|Predicted GTPase|R|General function prediction only ;	NA	IPR004095; TGS IPR012675; Beta-grasp domain IPR012676; TGS-like	NA
LOCMI00312	16.3608	13.5299	10.0113	15.2651	10.2218	15.5275	Oral cancer-overexpressed protein 1	ORAOV1	conserved hypothetical protein [Culex quinquefasciatus] gb|EDS43659.1| conserved hypothetical protein [Culex quinquefasciatus]	Oral cancer-overexpressed protein 1 OS=Homo sapiens GN=ORAOV1 PE=1 SV=2	Putative uncharacterized protein OS=Culex quinquefasciatus GN=CpipJ_CPIJ016358 PE=4 SV=1	NA	NA	IPR019191; Essential protein Yae1, N-terminal	NA
LOCMI00313	7.41945	7.06564	8.75991	6.52555	7.2688	6.53225	Methyltransferase-like protein 25	Mettl25	PREDICTED: methyltransferase-like protein 25 isoform X1 [Acyrthosiphon pisum] ref|XP_003247513.1| PREDICTED: methyltransferase-like protein 25 isoform X1 [Acyrthosiphon pisum] ref|XP_008187458.1| PREDICTED: methyltransferase-like protein 25 isoform X1 [Acyrthosiphon pisum]	Methyltransferase-like protein 25 OS=Mus musculus GN=Mettl25 PE=2 SV=1	Uncharacterized protein OS=Acyrthosiphon pisum GN=LOC100161960 PE=4 SV=1	NA	NA	IPR025714; Methyltransferase domain	NA
LOCMI00314	0.475606	0	0.125142	0.233055	0.22715	0.53543	LOCMI00314	LOCMI00314	LOCMI00314	LOCMI00314	LOCMI00314	LOCMI00314	LOCMI00314	LOCMI00314	LOCMI00314
LOCMI00315	11.2243	8.2683	5.75651	7.92388	10.9032	9.959	Lethal(2)neighbour of tid protein	l(2)not	hypothetical protein L798_10577, partial [Zootermopsis nevadensis]	Lethal(2)neighbour of tid protein OS=Drosophila melanogaster GN=l(2)not PE=1 SV=1	Putative uncharacterized protein (Fragment) OS=Solenopsis invicta GN=SINV_03630 PE=4 SV=1	NA	GO:0005783; endoplasmic reticulum; Cellular Component GO:0016021; integral component of membrane; Cellular Component GO:0016758; transferase activity, transferring hexosyl groups; Molecular Function	IPR007873; Glycosyltransferase, ALG3	K03845 ALG3; alpha-1,3-mannosyltransferase [EC:2.4.1.258] [EC:2.4.1.258] Metabolism; Glycan biosynthesis and metabolism; Glycosyltransferases [BR:ko01003] Metabolism; Glycan biosynthesis and metabolism; N-Glycan biosynthesis [PATH:ko00510] Metabolism; Glycan biosynthesis and metabolism; Various types of N-glycan biosynthesis [PATH:ko00513]
LOCMI00316	4.66094	4.96098	7.38336	11.8858	6.8145	8.03145	Probable tRNA (guanine(26)-N(2))-dimethyltransferase	CG6388	putative N(2),N(2)-dimethylguanosine tRNA methyltransferase, partial [Zootermopsis nevadensis]	Probable tRNA (guanine(26)-N(2))-dimethyltransferase OS=Drosophila melanogaster GN=CG6388 PE=2 SV=1	GI14433 OS=Drosophila mojavensis GN=Dmoj\GI14433 PE=4 SV=1	COG1867|N2,N2-dimethylguanosine tRNA methyltransferase|J|Translation, ribosomal structure and biogenesis ;	GO:0003723; RNA binding; Molecular Function GO:0004809; tRNA (guanine-N2-)-methyltransferase activity; Molecular Function GO:0008033; tRNA processing; Biological Process	IPR002905; tRNA methyltransferase, Trm1	K00555
LOCMI00317	2.75851	2.55566	3.87939	2.44708	2.38508	5.3543	ATP-binding cassette sub-family C member 11	ABCC11	PREDICTED: multidrug resistance-associated protein 5-like [Strongylocentrotus purpuratus]	ATP-binding cassette sub-family C member 11 OS=Homo sapiens GN=ABCC11 PE=1 SV=1	Uncharacterized protein OS=Strongylocentrotus purpuratus GN=Sp-Abcc5E PE=4 SV=1	COG1132|ABC-type multidrug transport system, ATPase and permease components|V|Defense mechanisms ;	GO:0005524; ATP binding; Molecular Function GO:0016887; ATPase activity; Molecular Function	IPR003439; ABC transporter-like IPR027417; P-loop containing nucleoside triphosphate hydrolase	NA
LOCMI00318	0	0	1.00113	0	0.113575	0.107086	Peroxisomal multifunctional enzyme type 2	HSD17B4	Chain A, Crystal Structure Of Human 17-beta-hydroxysteroid Dehydrogenase Type 4 In Complex With Nad pdb|1ZBQ|B Chain B, Crystal Structure Of Human 17-beta-hydroxysteroid Dehydrogenase Type 4 In Complex With Nad pdb|1ZBQ|C Chain C, Crystal Structure Of Human 17-beta-hydroxysteroid Dehydrogenase Type 4 In Complex With Nad pdb|1ZBQ|D Chain D, Crystal Structure Of Human 17-beta-hydroxysteroid Dehydro…	Peroxisomal multifunctional enzyme type 2 OS=Homo sapiens GN=HSD17B4 PE=1 SV=3	Peroxisomal multifunctional enzyme type 2 OS=Homo sapiens GN=HSD17B4 PE=2 SV=3	COG1028|Dehydrogenases with different specificities (related to short-chain alcohol dehydrogenases)|IQR|Lipid transport and metabolism ; Secondary metabolites biosynthesis, transport and catabolism ; General function prediction only ;	GO:0008152; metabolic process; Biological Process GO:0016491; oxidoreductase activity; Molecular Function	IPR002198; Short-chain dehydrogenase/reductase SDR IPR002347; Glucose/ribitol dehydrogenase IPR016040; NAD(P)-binding domain IPR020842; Polyketide synthase/Fatty acid synthase, KR	NA
LOCMI00319	0	0	0	0.466111	0	0.428344	DSS1/SEM1	LOCMI00319	NA	NA	NA	NA	NA	IPR007834; DSS1/SEM1	NA
LOCMI00320	24.351	56.2244	82.8437	68.7513	64.0563	70.2484	Nucleoside diphosphate kinase	awd	putative nucleoside diphosphate kinase [Coptotermes formosanus]	Nucleoside diphosphate kinase OS=Drosophila melanogaster GN=awd PE=1 SV=3	Nucleoside diphosphate kinase OS=Coptotermes formosanus PE=2 SV=1	COG0105|Nucleoside diphosphate kinase|F|Nucleotide transport and metabolism ;	GO:0004550; nucleoside diphosphate kinase activity; Molecular Function GO:0005524; ATP binding; Molecular Function GO:0006165; nucleoside diphosphate phosphorylation; Biological Process GO:0006183; GTP biosynthetic process; Biological Process GO:0006228; UTP biosynthetic process; Biological Process GO:0006241; CTP biosynthetic process; Biological Process	IPR001564; Nucleoside diphosphate kinase IPR023005; Nucleoside diphosphate kinase, active site	NA
LOCMI00321	8.27554	7.96763	16.5187	1.86444	2.15793	0.321258	LOCMI00321	LOCMI00321	LOCMI00321	LOCMI00321	LOCMI00321	LOCMI00321	LOCMI00321	LOCMI00321	LOCMI00321
LOCMI00323	5.89751	4.50998	5.25595	2.91319	13.5154	23.4518	LOCMI00323	LOCMI00323	LOCMI00323	LOCMI00323	LOCMI00323	LOCMI00323	LOCMI00323	LOCMI00323	LOCMI00323
LOCMI00324	91.2212	120.266	112.627	101.379	108.918	99.59	Dynein light chain 1, cytoplasmic	ctp	GK25335 [Drosophila willistoni] gb|EDW82064.1| GK25335 [Drosophila willistoni]	Dynein light chain 1, cytoplasmic OS=Drosophila melanogaster GN=ctp PE=1 SV=1	GK25335 OS=Drosophila willistoni GN=Dwil\GK25335 PE=4 SV=1	NA	GO:0005875; microtubule associated complex; Cellular Component GO:0007017; microtubule-based process; Biological Process	IPR001372; Dynein light chain, type 1/2 IPR019763; Dynein light chain, type 1/2, conserved site	K10418 DYNLL; dynein light chain LC8-type K10418 Organismal Systems; Excretory system; Vasopressin-regulated water reabsorption [PATH:ko04962]
LOCMI00326	0.285363	0	4.00453	0.349583	0.340725	0.321258	40S ribosomal protein S13-2	RPS13B	TPA: hypothetical protein similar to 40s ribosomal protein s13 (Broad) [Aspergillus nidulans FGSC A4]	40S ribosomal protein S13-2 OS=Arabidopsis thaliana GN=RPS13B PE=2 SV=1	Uncharacterized protein OS=Emericella nidulans (strain FGSC A4 / ATCC 38163 / CBS 112.46 / NRRL 194 / M139) GN=ANIA_06679 PE=3 SV=1	COG0184|Ribosomal protein S15P/S13E|J|Translation, ribosomal structure and biogenesis ;	GO:0003735; structural constituent of ribosome; Molecular Function GO:0005622; intracellular; Cellular Component GO:0005840; ribosome; Cellular Component GO:0006412; translation; Biological Process	IPR000589; Ribosomal protein S15 IPR009068; S15/NS1, RNA-binding	NA
LOCMI00327	0	0	0	0	0	0	ABC transporter B family member 25, mitochondrial	ABCB25	hypothetical protein AMTR_s00077p00170260 [Amborella trichopoda] gb|ERN04280.1| hypothetical protein AMTR_s00077p00170260 [Amborella trichopoda]	ABC transporter B family member 25, mitochondrial OS=Arabidopsis thaliana GN=ABCB25 PE=1 SV=1	Uncharacterized protein OS=Amborella trichopoda GN=AMTR_s00077p00170260 PE=4 SV=1	COG5265|ABC-type transport system involved in Fe-S cluster assembly, permease and ATPase components|O|Posttranslational modification, protein turnover, chaperones ;	GO:0005524; ATP binding; Molecular Function GO:0006810; transport; Biological Process GO:0016021; integral component of membrane; Cellular Component GO:0016887; ATPase activity; Molecular Function GO:0042626; ATPase activity, coupled to transmembrane movement of substances; Molecular Function GO:0055085; transmembrane transport; Biological Process	IPR001140; ABC transporter, transmembrane domain IPR003439; ABC transporter-like IPR011527; ABC transporter type 1, transmembrane domain IPR027417; P-loop containing nucleoside triphosphate hydrolase	NA
LOCMI00328	0	0	0	0	0	0	ATP-dependent rRNA helicase spb4	spb4	ATP-dependent RNA helicase DDX55 [Zootermopsis nevadensis]	ATP-dependent rRNA helicase spb4 OS=Schizosaccharomyces pombe (strain 972 / ATCC 24843) GN=spb4 PE=3 SV=1	Uncharacterized protein OS=Strongylocentrotus purpuratus GN=Sp-Ddx55 PE=4 SV=1	NA	NA	IPR025313; Domain of unknown function DUF4217	NA
LOCMI00329	1.3317	0	0.625708	0	0.567875	0	LOCMI00329	LOCMI00329	LOCMI00329	LOCMI00329	LOCMI00329	LOCMI00329	LOCMI00329	LOCMI00329	LOCMI00329
LOCMI00330	24.5413	10.0723	6.25708	4.07847	3.86155	7.38894	LOCMI00330	LOCMI00330	LOCMI00330	LOCMI00330	LOCMI00330	LOCMI00330	LOCMI00330	LOCMI00330	LOCMI00330
LOCMI00331	0	0	0.75085	0	0	0	calmodulin, putative	Calmodulin	calmodulin, putative [Babesia equi] gb|AFZ79692.1| calmodulin, putative [Babesia equi]	Calmodulin OS=Triticum aestivum PE=1 SV=3	Calmodulin, putative OS=Babesia equi GN=BEWA_025410 PE=4 SV=1	COG5126|Ca2+-binding protein (EF-Hand superfamily)|TZDR|Signal transduction mechanisms ; Cytoskeleton ; Cell cycle control, cell division, chromosome partitioning ; General function prediction only ;	GO:0005509; calcium ion binding; Molecular Function	IPR002048; EF-hand domain IPR011992; EF-hand domain pair	NA
LOCMI00332	0.475606	0	0	0.233055	0.22715	0.214172	WD repeat-containing protein 81	Wdr81	WD repeat-containing protein 81 [Zootermopsis nevadensis]	WD repeat-containing protein 81 OS=Rattus norvegicus GN=Wdr81 PE=1 SV=1	Uncharacterized protein OS=Dendroctonus ponderosae GN=D910_05791 PE=4 SV=1	NA	GO:0005488; binding; Molecular Function	IPR011989; Armadillo-like helical IPR016024; Armadillo-type fold	NA
LOCMI00333	6.84872	5.11131	1.87712	8.8561	0.908601	4.06927	Pyridoxal-dependent decarboxylase domain-containing protein 1	PDXDC1	Pyridoxal-dependent decarboxylase domain-containing protein 1 [Zootermopsis nevadensis]	NA	NA	NA	NA	NA	NA
LOCMI00334	1.23658	1.95433	1.87712	1.98097	1.3629	0.856688	Ankyrin repeat and SOCS box protein 13	Asb13	Ankyrin repeat and KH domain-containing protein 1 [Zootermopsis nevadensis]	Ankyrin repeat and SOCS box protein 13 OS=Mus musculus GN=Asb13 PE=2 SV=1	Ankyrin repeat-containing protein, putative OS=Pediculus humanus subsp. corporis GN=Phum_PHUM395910 PE=4 SV=1	COG0666|FOG: Ankyrin repeat|R|General function prediction only ;	GO:0005515; protein binding; Molecular Function GO:0035556; intracellular signal transduction; Biological Process	IPR001496; SOCS protein, C-terminal IPR002110; Ankyrin repeat IPR020683; Ankyrin repeat-containing domain	NA
LOCMI00335	0	0	1.37656	0	0	0.428344	Calmodulin	CMD1	predicted protein [Physcomitrella patens] gb|EDQ72262.1| predicted protein [Physcomitrella patens]	Calmodulin OS=Pleurotus ostreatus GN=CMD1 PE=2 SV=3	Predicted protein OS=Physcomitrella patens subsp. patens GN=PHYPADRAFT_210000 PE=4 SV=1	COG5126|Ca2+-binding protein (EF-Hand superfamily)|TZDR|Signal transduction mechanisms ; Cytoskeleton ; Cell cycle control, cell division, chromosome partitioning ; General function prediction only ;	GO:0005509; calcium ion binding; Molecular Function	IPR002048; EF-hand domain IPR011992; EF-hand domain pair IPR018247; EF-Hand 1, calcium-binding site	NA
LOCMI00336	3.32924	4.66031	2.50283	5.4768	2.7258	3.31967	MADF domain	LOCMI00336	NA	NA	Uncharacterized protein OS=Acyrthosiphon pisum PE=4 SV=1	NA	NA	IPR006578; MADF domain	NA
LOCMI00337	1.61706	3.15699	1.25142	2.33055	2.38508	2.57007	T-complex protein 1 subunit epsilon	CCT5	T-complex protein subunit epsilon [Locusta migratoria]	T-complex protein 1 subunit epsilon OS=Macaca fascicularis GN=CCT5 PE=2 SV=1	T-complex protein subunit epsilon OS=Locusta migratoria GN=tcp1-epsilon PE=3 SV=1	COG0459|Chaperonin GroEL (HSP60 family)|O|Posttranslational modification, protein turnover, chaperones ;	GO:0005524; ATP binding; Molecular Function GO:0006457; protein folding; Biological Process GO:0044267; cellular protein metabolic process; Biological Process GO:0051082; unfolded protein binding; Molecular Function	IPR002194; Chaperonin TCP-1, conserved site IPR002423; Chaperonin Cpn60/TCP-1 IPR017998; Chaperone tailless complex polypeptide 1 (TCP-1) IPR027409; GroEL-like apical domain IPR027410; TCP-1-like chaperonin intermediate domain IPR027413; GroEL-like equatorial domain	NA
LOCMI00338	8.18042	10.2226	5.25595	7.5743	5.33803	3.8551	LOCMI00338	LOCMI00338	LOCMI00338	LOCMI00338	LOCMI00338	LOCMI00338	LOCMI00338	LOCMI00338	LOCMI00338
LOCMI00339	1.90242	3.00665	1.87712	1.74791	1.70363	2.14172	LOCMI00339	LOCMI00339	LOCMI00339	LOCMI00339	LOCMI00339	LOCMI00339	LOCMI00339	LOCMI00339	LOCMI00339
LOCMI00340	0.475606	3.45765	4.00453	0.582638	1.02218	1.4992	Dosage compensation regulator	mle	PREDICTED: dosage compensation regulator isoform X1 [Nasonia vitripennis]	Dosage compensation regulator OS=Drosophila melanogaster GN=mle PE=2 SV=2	Uncharacterized protein OS=Nasonia vitripennis PE=4 SV=1	NA	NA	NA	NA
LOCMI00341	0.285363	0	0	0	0	0	LOCMI00341	LOCMI00341	LOCMI00341	LOCMI00341	LOCMI00341	LOCMI00341	LOCMI00341	LOCMI00341	LOCMI00341
LOCMI00342	0	0	2.00227	0.466111	0.113575	0.428344	Rhodanese-like domain	LOCMI00342	NA	NA	NA	NA	NA	IPR001763; Rhodanese-like domain	NA
LOCMI00344	2.66339	5.11131	4.63024	2.21403	2.15793	1.60629	RPA-interacting protein, C-terminal domain	LOCMI00344	NA	NA	NA	NA	NA	IPR028159; RPA-interacting protein, C-terminal domain	NA
LOCMI00345	0	0	0	0	0.113575	0.107086	LOCMI00345	LOCMI00345	LOCMI00345	LOCMI00345	LOCMI00345	LOCMI00345	LOCMI00345	LOCMI00345	LOCMI00345
LOCMI00346	0	0	0.250283	0	0	0	predicted protein	PUM3	predicted protein [Nematostella vectensis] gb|EDO42548.1| predicted protein [Nematostella vectensis]	Pumilio domain-containing protein KIAA0020 homolog OS=Rattus norvegicus PE=2 SV=1	Predicted protein OS=Nematostella vectensis GN=v1g184407 PE=4 SV=1	NA	GO:0003723; RNA binding; Molecular Function GO:0005488; binding; Molecular Function	IPR001313; Pumilio RNA-binding repeat IPR011989; Armadillo-like helical IPR012959; CPL IPR016024; Armadillo-type fold	K14844
LOCMI00348	0.0951212	0	2.25255	0.699166	0	0	Alpha-actinin, sarcomeric	Actn	alphaactinin, putative [Acanthamoeba castellanii str. Neff] gb|ELR12014.1| alphaactinin, putative [Acanthamoeba castellanii str. Neff]	Alpha-actinin, sarcomeric OS=Drosophila melanogaster GN=Actn PE=1 SV=2	Alphaactinin, putative OS=Acanthamoeba castellanii str. Neff GN=ACA1_321210 PE=4 SV=1	COG5069|Ca2+-binding actin-bundling protein fimbrin/plastin (EF-Hand superfamily)|Z|Cytoskeleton ;	GO:0005509; calcium ion binding; Molecular Function	IPR002048; EF-hand domain IPR011992; EF-hand domain pair IPR014837; EF-hand, Ca insensitive IPR018247; EF-Hand 1, calcium-binding site	NA
LOCMI00349	10.9389	7.21597	5.50623	8.62305	8.40456	13.0645	AP-2 complex subunit alpha	alpha-Adaptin	alpha-adaptin [Acheta domesticus] gb|ACY44993.1| alpha-adaptin [Periplaneta americana]	AP-2 complex subunit alpha OS=Anopheles gambiae GN=alpha-Adaptin PE=3 SV=4	Alpha-adaptin (Fragment) OS=Periplaneta americana PE=2 SV=1	NA	GO:0005488; binding; Molecular Function GO:0006886; intracellular protein transport; Biological Process GO:0016192; vesicle-mediated transport; Biological Process GO:0030117; membrane coat; Cellular Component	IPR002553; Clathrin/coatomer adaptor, adaptin-like, N-terminal IPR011989; Armadillo-like helical IPR016024; Armadillo-type fold	NA
LOCMI00350	3.42436	3.75832	5.25595	3.72888	3.40725	6.63934	5'-3' exoribonuclease 1	XRN1	5'-3' exoribonuclease 1 [Zootermopsis nevadensis]	5'-3' exoribonuclease 1 OS=Homo sapiens GN=XRN1 PE=1 SV=1	Uncharacterized protein OS=Nasonia vitripennis PE=4 SV=1	COG5049|5'-3' exonuclease|LDA|Replication, recombination and repair ; Cell cycle control, cell division, chromosome partitioning ; RNA processing and modification ;	GO:0003676; nucleic acid binding; Molecular Function GO:0004527; exonuclease activity; Molecular Function GO:0005622; intracellular; Cellular Component	IPR004859; Putative 5-3 exonuclease IPR027073; 5'-3' exoribonuclease	K12618 XRN1, SEP1, KEM1; 5'-3' exoribonuclease 1 [EC:3.1.13.-] [EC:3.1.13.-] Genetic Information Processing; Translation; Ribosome biogenesis in eukaryotes [PATH:ko03008] Genetic Information Processing; Folding, sorting and degradation; Proteasome [BR:ko03051] Genetic Information Processing; Folding, sorting and degradation; RNA degradation [PATH:ko03018]
LOCMI00351	33.4826	23.3016	18.3958	30.4137	25.7815	34.1605	IST1 homolog	Ist1	PREDICTED: IST1 homolog isoform X1 [Apis mellifera]	IST1 homolog OS=Rattus norvegicus GN=Ist1 PE=2 SV=1	Uncharacterized protein OS=Nasonia vitripennis PE=4 SV=1	NA	NA	IPR005061; Domain of unknown function DUF292, eukaryotic	NA
LOCMI00352	2.85363	2.40532	2.37769	1.86444	2.38508	2.78424	Fat-like cadherin-related tumor suppressor homolog	kug	Fat-like cadherin-related tumor suppressor-like protein [Cerapachys biroi]	Fat-like cadherin-related tumor suppressor homolog OS=Drosophila melanogaster GN=kug PE=2 SV=2	Putative fat-like cadherin-related tumor suppressor-like protein OS=Camponotus floridanus GN=EAG_15955 PE=4 SV=1	NA	GO:0005509; calcium ion binding; Molecular Function GO:0005886; plasma membrane; Cellular Component GO:0007155; cell adhesion; Biological Process GO:0007156; homophilic cell adhesion; Biological Process GO:0016020; membrane; Cellular Component	IPR002126; Cadherin IPR015919; Cadherin-like IPR020894; Cadherin conserved site	NA
LOCMI00353	0	0	0.375425	0.932221	0	0	Trafficking protein particle complex subunit 5	trappc5	hypothetical protein RO3G_01760 [Rhizopus delemar RA 99-880]	Trafficking protein particle complex subunit 5 OS=Dictyostelium discoideum GN=trappc5 PE=3 SV=1	Uncharacterized protein OS=Rhizopus delemar (strain RA 99-880 / ATCC MYA-4621 / FGSC 9543 / NRRL 43880) GN=RO3G_01760 PE=4 SV=1	COG5128|Transport protein particle (TRAPP) complex subunit|U|Intracellular trafficking, secretion, and vesicular transport ;	NA	IPR007194; Transport protein particle (TRAPP) component IPR016696; TRAPP I complex, subunit 5 IPR024096; NO signalling/Golgi transport ligand-binding domain	NA
LOCMI00354	1.99754	2.25499	4.63024	3.26277	2.7258	2.57007	Phosphatidylinositide phosphatase SAC2	Inpp5f	Phosphatidylinositide phosphatase SAC2 [Zootermopsis nevadensis]	Phosphatidylinositide phosphatase SAC2 OS=Mus musculus GN=Inpp5f PE=1 SV=1	Uncharacterized protein (Fragment) OS=Dendroctonus ponderosae GN=D910_05030 PE=4 SV=1	COG5329|Phosphoinositide polyphosphatase (Sac family)|T|Signal transduction mechanisms ;	GO:0042578; phosphoric ester hydrolase activity; Molecular Function	IPR002013; Synaptojanin, N-terminal	NA
LOCMI00355	0.0951212	0	0.625708	0.349583	0	0.107086	Ubiquitin carboxyl-terminal hydrolase isozyme L5	UCHL5	PREDICTED: ubiquitin carboxyl-terminal hydrolase isozyme L5 [Glycine max]	Ubiquitin carboxyl-terminal hydrolase isozyme L5 OS=Homo sapiens GN=UCHL5 PE=1 SV=3	Uncharacterized protein OS=Glycine max PE=4 SV=1	NA	GO:0004221; ubiquitin thiolesterase activity; Molecular Function GO:0005622; intracellular; Cellular Component GO:0006511; ubiquitin-dependent protein catabolic process; Biological Process GO:0008242; omega peptidase activity; Molecular Function	IPR001578; Peptidase C12, ubiquitin carboxyl-terminal hydrolase 1 IPR017390; Ubiquitinyl hydrolase, UCH37 type	K05610
LOCMI00357	81.8042	129.136	135.153	81.3363	85.6356	63.9304	Valacyclovir hydrolase	Bphl	Valacyclovir hydrolase [Zootermopsis nevadensis]	Valacyclovir hydrolase OS=Mus musculus GN=Bphl PE=1 SV=1	Bphl protein OS=Xenopus laevis GN=bphl PE=2 SV=1	COG0596|Predicted hydrolases or acyltransferases (alpha/beta hydrolase superfamily) |R|General function prediction only ;	NA	IPR000073; Alpha/beta hydrolase fold-1	K18399
LOCMI00358	0	0	0	0	0	0	DNA binding HTH domain, Psq-type Homeodomain-like	LOCMI00358	NA	NA	NA	NA	GO:0003677; DNA binding; Molecular Function	IPR007889; DNA binding HTH domain, Psq-type IPR009057; Homeodomain-like	NA
LOCMI00359	0.380485	1.95433	7.38336	4.89416	0	0.856688	LOCMI00359	LOCMI00359	LOCMI00359	LOCMI00359	LOCMI00359	LOCMI00359	LOCMI00359	LOCMI00359	LOCMI00359
LOCMI00360	0.475606	0.300665	0.250283	0.699166	0	0.321258	DE-cadherin	shg	Cadherin-23 precursor, putative [Pediculus humanus corporis] gb|EEB17246.1| Cadherin-23 precursor, putative [Pediculus humanus corporis]	DE-cadherin OS=Drosophila melanogaster GN=shg PE=1 SV=2	Cadherin-23, putative OS=Pediculus humanus subsp. corporis GN=Phum_PHUM458490 PE=3 SV=1	NA	GO:0005509; calcium ion binding; Molecular Function GO:0005886; plasma membrane; Cellular Component GO:0007155; cell adhesion; Biological Process GO:0007156; homophilic cell adhesion; Biological Process GO:0016020; membrane; Cellular Component	IPR002126; Cadherin IPR015919; Cadherin-like IPR020894; Cadherin conserved site	NA
LOCMI00361	1.99754	0.601331	0	1.98097	0.4543	1.82046	FTH1 ferritin heavy chain	LOCMI00361	hypothetical protein SINV_07613 [Solenopsis invicta]	Soma ferritin OS=Lymnaea stagnalis PE=2 SV=2	Putative uncharacterized protein (Fragment) OS=Solenopsis invicta GN=SINV_07613 PE=4 SV=1	COG1528|Ferritin-like protein|P|Inorganic ion transport and metabolism ;	GO:0006826; iron ion transport; Biological Process GO:0006879; cellular iron ion homeostasis; Biological Process GO:0008199; ferric iron binding; Molecular Function	IPR001519; Ferritin IPR008331; Ferritin/DPS protein domain IPR009040; Ferritin- like diiron domain IPR009078; Ferritin-like superfamily IPR012347; Ferritin-related	K00522 FTH1; ferritin heavy chain [EC:1.16.3.1] [EC:1.16.3.1] Metabolism; Metabolism of cofactors and vitamins; Porphyrin and chlorophyll metabolism [PATH:ko00860] Organismal Systems; Digestive system; Mineral absorption [PATH:ko04978]
LOCMI00362	5.61215	0.751664	2.00227	3.14625	2.49865	1.17795	LOCMI00362	LOCMI00362	LOCMI00362	LOCMI00362	LOCMI00362	LOCMI00362	LOCMI00362	LOCMI00362	LOCMI00362
LOCMI00363	0.190242	0	5.25595	1.86444	0.22715	0.428344	40S ribosomal protein S16	rps16	ribosomal protein S9/S16 [Helicosporidium sp. ATCC 50920]	40S ribosomal protein S16 OS=Dictyostelium discoideum GN=rps16 PE=3 SV=1	40S ribosomal protein S16e OS=Galdieria sulphuraria GN=Gasu_52020 PE=3 SV=1	COG0103|Ribosomal protein S9|J|Translation, ribosomal structure and biogenesis ;	GO:0003735; structural constituent of ribosome; Molecular Function GO:0005840; ribosome; Cellular Component GO:0006412; translation; Biological Process	IPR000754; Ribosomal protein S9 IPR014721; Ribosomal protein S5 domain 2-type fold, subgroup IPR020568; Ribosomal protein S5 domain 2-type fold IPR020574; Ribosomal protein S9, conserved site	K02996 RP-S9, MRPS9, rpsI; small subunit ribosomal protein S9 K02996 Genetic Information Processing; Translation; Ribosome [PATH:ko03010]
LOCMI00364	0.475606	0.300665	0.625708	1.74791	0.908601	1.17795	Anaphase-promoting complex subunit 1	ANAPC1	hypothetical protein L798_00564, partial [Zootermopsis nevadensis]	Anaphase-promoting complex subunit 1 OS=Homo sapiens GN=ANAPC1 PE=1 SV=1	Anaphase-promoting complex subunit 1 OS=Camponotus floridanus GN=EAG_10518 PE=4 SV=1	NA	GO:0005680; anaphase-promoting complex; Cellular Component	IPR024990; Anaphase-promoting complex subunit 1	NA
LOCMI00365	0	0	0.375425	0.349583	0	0	MOB kinase activator-like 1 homolog C	mobC	mob as tumor suppressorlike protein [Acanthamoeba castellanii str. Neff] gb|ELR22536.1| mob as tumor suppressorlike protein [Acanthamoeba castellanii str. Neff]	MOB kinase activator-like 1 homolog C OS=Dictyostelium discoideum GN=mobC PE=3 SV=1	Mob as tumor suppressorlike protein OS=Acanthamoeba castellanii str. Neff GN=ACA1_142270 PE=4 SV=1	NA	NA	IPR005301; Mob1/phocein	NA
LOCMI00366	82.0896	130.338	108.498	87.2792	82.0012	61.3603	LOCMI00366	LOCMI00366	LOCMI00366	LOCMI00366	LOCMI00366	LOCMI00366	LOCMI00366	LOCMI00366	LOCMI00366
LOCMI00367	7.99018	9.47096	9.6359	4.89416	2.83938	5.67556	Mediator of RNA polymerase II transcription subunit 14	MED14	Mediator of RNA polymerase II transcription subunit 14 [Zootermopsis nevadensis]	Mediator of RNA polymerase II transcription subunit 14 OS=Aedes aegypti GN=MED14 PE=3 SV=2	Uncharacterized protein OS=Dendroctonus ponderosae GN=D910_11231 PE=4 SV=1	NA	GO:0001104; RNA polymerase II transcription cofactor activity; Molecular Function GO:0006357; regulation of transcription from RNA polymerase II promoter; Biological Process GO:0016592; mediator complex; Cellular Component	IPR013947; Mediator complex, subunit Med14	NA
LOCMI00368	0.665848	0.150333	0.500566	1.98097	1.47648	2.03463	Zinc finger protein 506	ZNF506	PREDICTED: uncharacterized protein LOC101847609 [Aplysia californica]	Zinc finger protein 506 OS=Homo sapiens GN=ZNF506 PE=2 SV=2	Uncharacterized protein (Fragment) OS=Bos taurus GN=ZNF596 PE=4 SV=2	COG5048|FOG: Zn-finger|R|General function prediction only ;	GO:0003676; nucleic acid binding; Molecular Function GO:0046872; metal ion binding; Molecular Function	IPR007087; Zinc finger, C2H2 IPR013087; Zinc finger C2H2-type/integrase DNA-binding domain IPR015880; Zinc finger, C2H2-like	NA
LOCMI00369	38.7143	36.2302	35.9156	42.2995	37.2526	44.1195	MAP/microtubule affinity-regulating kinase 3, partial	MARK3	MAP/microtubule affinity-regulating kinase 3, partial [Zootermopsis nevadensis]	NA	Serine/threonine-protein kinase MARK2, putative OS=Pediculus humanus subsp. corporis GN=Phum_PHUM509230 PE=4 SV=1	NA	NA	NA	NA
LOCMI00370	0	0	0	0.699166	0.22715	0.214172	M-phase inducer phosphatase	stg	M-phase inducer phosphatase [Zootermopsis nevadensis]	M-phase inducer phosphatase OS=Drosophila melanogaster GN=stg PE=1 SV=2	M-phase inducer phosphatase OS=Riptortus pedestris PE=2 SV=1	COG5105|Mitotic inducer, protein phosphatase|D|Cell cycle control, cell division, chromosome partitioning ;	GO:0000087; mitotic M phase; Biological Process GO:0004725; protein tyrosine phosphatase activity; Molecular Function GO:0005622; intracellular; Cellular Component GO:0006470; protein dephosphorylation; Biological Process	IPR000751; M-phase inducer phosphatase IPR001763; Rhodanese-like domain	NA
LOCMI00371	14.7438	9.77163	17.8953	11.4197	11.1304	8.03145	Phosphatidylinositol glycan anchor biosynthesis class U protein	Pigu	Phosphatidylinositol glycan anchor biosynthesis class U protein [Zootermopsis nevadensis]	Phosphatidylinositol glycan anchor biosynthesis class U protein OS=Rattus norvegicus GN=Pigu PE=1 SV=3	Putative major facilitator superfamily permease OS=Rhodnius prolixus PE=2 SV=1	NA	GO:0005789; endoplasmic reticulum membrane; Cellular Component GO:0006506; GPI anchor biosynthetic process; Biological Process GO:0016021; integral component of membrane; Cellular Component	IPR009600; GPI transamidase subunit PIG-U	NA
LOCMI00372	103.587	107.789	102.366	42.8822	80.4112	70.4626	Porphobilinogen deaminase	Hmbs	Porphobilinogen deaminase [Zootermopsis nevadensis]	Porphobilinogen deaminase OS=Mus musculus GN=Hmbs PE=1 SV=2	Uncharacterized protein OS=Apis mellifera GN=LOC726030 PE=3 SV=1	COG0181|Porphobilinogen deaminase|H|Coenzyme transport and metabolism ;	GO:0004418; hydroxymethylbilane synthase activity; Molecular Function GO:0018160; peptidyl-pyrromethane cofactor linkage; Biological Process GO:0033014; tetrapyrrole biosynthetic process; Biological Process	IPR000860; Tetrapyrrole biosynthesis, hydroxymethylbilane synthase IPR022417; Porphobilinogen deaminase, N-terminal IPR022418; Porphobilinogen deaminase, C-terminal IPR022419; Porphobilinogen deaminase, dipyrromethane cofactor binding site	K01749 hemC, HMBS; hydroxymethylbilane synthase [EC:2.5.1.61] [EC:2.5.1.61] Metabolism; Metabolism of cofactors and vitamins; Porphyrin and chlorophyll metabolism [PATH:ko00860]
LOCMI00373	3.04388	2.10466	1.62684	1.86444	3.29368	3.64093	DNA transposase THAP9	THAP9	hypothetical protein TcasGA2_TC016176 [Tribolium castaneum]	DNA transposase THAP9 OS=Homo sapiens GN=THAP9 PE=1 SV=2	Putative uncharacterized protein OS=Tribolium castaneum GN=TcasGA2_TC016176 PE=4 SV=1	NA	GO:0003676; nucleic acid binding; Molecular Function	IPR006612; Zinc finger, C2CH-type	NA
LOCMI00375	111.102	74.7154	50.6824	51.8548	59.059	69.4988	NA	LOCMI00375	hypothetical protein L798_06304 [Zootermopsis nevadensis]	NA	Uncharacterized protein OS=Rhodnius prolixus PE=4 SV=1	NA	NA	NA	NA
LOCMI00376	1247.42	1462.59	1455.02	1578.83	1891.14	1696.99	Translationally-controlled tumor protein homolog	Tctp	putative translationally controlled tumor protein [Maconellicoccus hirsutus]	Translationally-controlled tumor protein homolog OS=Bombyx mori GN=Tctp PE=2 SV=1	Putative translationally controlled tumor protein OS=Maconellicoccus hirsutus PE=2 SV=1	NA	NA	IPR011057; Mss4-like IPR011323; Mss4/translationally controlled tumour-associated TCTP IPR018103; Translationally controlled tumour protein, conserved site IPR018105; Translationally controlled tumour protein	NA
LOCMI00377	0.380485	2.40532	1.00113	0.932221	2.7258	3.8551	LOCMI00377	LOCMI00377	LOCMI00377	LOCMI00377	LOCMI00377	LOCMI00377	LOCMI00377	LOCMI00377	LOCMI00377
LOCMI00378	25.0169	20.4452	30.91	18.2948	33.8454	54.8281	LOCMI00378	LOCMI00378	LOCMI00378	LOCMI00378	LOCMI00378	LOCMI00378	LOCMI00378	LOCMI00378	LOCMI00378
LOCMI00379	0.85609	0.450998	2.75312	1.04875	0.4543	0.214172	Protein of unknown function DUF227 Protein kinase-like domain CHK kinase-like	LOCMI00379	hypothetical protein L798_11578 [Zootermopsis nevadensis]	NA	Uncharacterized protein OS=Dendroctonus ponderosae GN=D910_07373 PE=4 SV=1	NA	GO:0016772; transferase activity, transferring phosphorus-containing groups; Molecular Function	IPR004119; Protein of unknown function DUF227 IPR011009; Protein kinase-like domain IPR015897; CHK kinase-like	NA
LOCMI00380	0.475606	0	1.00113	0	1.13575	0.321258	Meiosis arrest female protein 1 homolog	marf1	Limkain-b1, partial [Zootermopsis nevadensis]	Meiosis arrest female protein 1 homolog OS=Xenopus tropicalis GN=marf1 PE=2 SV=1	Limkain-b1 OS=Harpegnathos saltator GN=EAI_11225 PE=4 SV=1	NA	GO:0005777; peroxisome; Cellular Component GO:0010468; regulation of gene expression; Biological Process GO:0048477; oogenesis; Biological Process	IPR024768; Meiosis arrest female protein 1 IPR025605; OST-HTH/LOTUS domain	NA
LOCMI00382	0	0	0.875991	0.582638	0.22715	0	LOCMI00382	LOCMI00382	LOCMI00382	LOCMI00382	LOCMI00382	LOCMI00382	LOCMI00382	LOCMI00382	LOCMI00382
LOCMI00383	0	0	0	0	0	0	Membrane-bound transcription factor site-1 protease	MBTPS1	hypothetical protein HELRODRAFT_194246 [Helobdella robusta]	Membrane-bound transcription factor site-1 protease OS=Cricetulus griseus GN=MBTPS1 PE=1 SV=1	Uncharacterized protein OS=Helobdella robusta GN=HELRODRAFT_194246 PE=4 SV=1	NA	NA	IPR015500; Peptidase S8, subtilisin-related	NA
LOCMI00384	0	0	0	0	0	0	Ribosomal L1 domain-containing protein 1	RSL1D1	PREDICTED: ribosomal L1 domain-containing protein 1-like [Solanum lycopersicum]	Ribosomal L1 domain-containing protein 1 OS=Pongo abelii GN=RSL1D1 PE=2 SV=2	Uncharacterized protein OS=Solanum lycopersicum GN=Solyc01g111420.2 PE=4 SV=1	NA	NA	IPR016095; Ribosomal protein L1, 3-layer alpha/beta-sandwich IPR023674; Ribosomal protein L1-like IPR028364; Ribosomal protein L1/ribosomal biogenesis protein	K14775
LOCMI00385	0.475606	0.450998	0.625708	0.582638	0	0.321258	LOCMI00385	LOCMI00385	LOCMI00385	LOCMI00385	LOCMI00385	LOCMI00385	LOCMI00385	LOCMI00385	LOCMI00385
LOCMI00386	2.18779	1.80399	1.00113	1.98097	0.908601	1.82046	Vacuolar protein sorting-associated protein 13D	VPS13D	Vacuolar protein sorting-associated protein 13D [Zootermopsis nevadensis]	Vacuolar protein sorting-associated protein 13D OS=Homo sapiens GN=VPS13D PE=1 SV=1	Uncharacterized protein OS=Nasonia vitripennis PE=4 SV=1	NA	NA	IPR000772; Ricin B lectin domain	NA
LOCMI00388	0	0	0.875991	0	0	0	COP9 signalosome complex subunit 4	csn4	proteasome component region PCI domain-containing protein [Polysphondylium pallidum PN500]	COP9 signalosome complex subunit 4 OS=Dictyostelium discoideum GN=csn4 PE=2 SV=1	Proteasome component region PCI domain-containing protein OS=Polysphondylium pallidum GN=CSN4 PE=4 SV=1	NA	GO:0005515; protein binding; Molecular Function	IPR000717; Proteasome component (PCI) domain IPR011991; Winged helix-turn-helix DNA-binding domain	NA
LOCMI00390	0	0	0	0	0	0	LOCMI00390	LOCMI00390	LOCMI00390	LOCMI00390	LOCMI00390	LOCMI00390	LOCMI00390	LOCMI00390	LOCMI00390
LOCMI00391	0	0.901996	0.375425	0	0	0	PREDICTED: translocon-associated protein subunit beta-like	SSR2	PREDICTED: translocon-associated protein subunit beta-like [Saccoglossus kowalevskii]	NA	NA	NA	GO:0005783; endoplasmic reticulum; Cellular Component GO:0016021; integral component of membrane; Cellular Component	IPR008856; Translocon-associated protein subunit beta	NA
LOCMI00392	0	0	0.250283	0	0	0	LOCMI00392	LOCMI00392	LOCMI00392	LOCMI00392	LOCMI00392	LOCMI00392	LOCMI00392	LOCMI00392	LOCMI00392
LOCMI00393	42.7094	57.4271	69.9542	57.6812	46.5658	48.2958	LOCMI00393	LOCMI00393	LOCMI00393	LOCMI00393	LOCMI00393	LOCMI00393	LOCMI00393	LOCMI00393	LOCMI00393
LOCMI00394	1164.38	1524.22	1956.21	1679.63	2062.18	1705.56	40S ribosomal protein S3	rps3	40S ribosomal protein S3 [Zootermopsis nevadensis]	40S ribosomal protein S3 OS=Ictalurus punctatus GN=rps3 PE=2 SV=1	S3e ribosomal protein OS=Coptotermes formosanus PE=2 SV=1	COG0092|Ribosomal protein S3|J|Translation, ribosomal structure and biogenesis ;	GO:0003723; RNA binding; Molecular Function GO:0003735; structural constituent of ribosome; Molecular Function GO:0005840; ribosome; Cellular Component GO:0006412; translation; Biological Process GO:0015935; small ribosomal subunit; Cellular Component	IPR001351; Ribosomal protein S3, C-terminal IPR004044; K Homology domain, type 2 IPR005703; Ribosomal protein S3, eukaryotic/archaeal IPR009019; K homology domain, prokaryotic type IPR015946; K homology domain-like, alpha/beta	K02985 RP-S3e, RPS3; small subunit ribosomal protein S3e K02985 Genetic Information Processing; Translation; Ribosome [PATH:ko03010]
LOCMI00395	0.285363	0	0	0	0.340725	0	Neprilysin	MME	endothelin-converting enzyme, putative [Pediculus humanus corporis] gb|EEB19488.1| endothelin-converting enzyme, putative [Pediculus humanus corporis]	Neprilysin OS=Oryctolagus cuniculus GN=MME PE=1 SV=2	Endothelin-converting enzyme, putative OS=Pediculus humanus subsp. corporis GN=Phum_PHUM577400 PE=4 SV=1	COG3590|Predicted metalloendopeptidase|O|Posttranslational modification, protein turnover, chaperones ;	GO:0004222; metalloendopeptidase activity; Molecular Function GO:0006508; proteolysis; Biological Process GO:0008237; metallopeptidase activity; Molecular Function	IPR000718; Peptidase M13 IPR018497; Peptidase M13, C-terminal domain IPR024079; Metallopeptidase, catalytic domain	NA
LOCMI00396	0	0.450998	4.00453	0.699166	0.68145	1.28503	Ras-related protein Rap-1	RAP1	Pprap1 protein [Physarum polycephalum]	Ras-related protein Rap-1 OS=Physarum polycephalum GN=RAP1 PE=2 SV=1	Predicted protein OS=Nematostella vectensis GN=v1g187791 PE=4 SV=1	COG1100|GTPase SAR1 and related small G proteins|R|General function prediction only ;	GO:0003924; GTPase activity; Molecular Function GO:0005525; GTP binding; Molecular Function GO:0005622; intracellular; Cellular Component GO:0006184; GTP catabolic process; Biological Process GO:0007165; signal transduction; Biological Process GO:0007264; small GTPase mediated signal transduction; Biological Process GO:0015031; protein transport; Biological Process GO:0016020; membrane; Cellular …	IPR001806; Small GTPase superfamily IPR003578; Small GTPase superfamily, Rho type IPR003579; Small GTPase superfamily, Rab type IPR020849; Small GTPase superfamily, Ras type IPR027417; P-loop containing nucleoside triphosphate hydrolase	NA
LOCMI00398	0	0	0	0	0	0	LOCMI00398	LOCMI00398	LOCMI00398	LOCMI00398	LOCMI00398	LOCMI00398	LOCMI00398	LOCMI00398	LOCMI00398
LOCMI00399	17.1218	6.46431	5.38109	8.50652	5.56518	6.63934	UPF0554 protein C2orf43 homolog	RCJMB04_2g19	hypothetical protein L798_01679 [Zootermopsis nevadensis]	UPF0554 protein C2orf43 homolog OS=Gallus gallus GN=RCJMB04_2g19 PE=2 SV=2	AAEL000412-PA OS=Aedes aegypti GN=AAEL000412 PE=2 SV=1	NA	NA	IPR019363; Protein of unknown function DUF2305	NA
LOCMI00401	9.32187	6.31397	7.38336	15.6147	13.7426	14.6708	LOCMI00401	LOCMI00401	LOCMI00401	LOCMI00401	LOCMI00401	LOCMI00401	LOCMI00401	LOCMI00401	LOCMI00401
LOCMI00402	0	0.300665	2.12741	0.349583	0.340725	0	Spermidine synthase	spsA	spermidine synthase [Polysphondylium pallidum PN500]	Spermidine synthase OS=Dictyostelium discoideum GN=spsA PE=3 SV=2	Spermidine synthase OS=Polysphondylium pallidum GN=spsA PE=3 SV=1	COG0421|Spermidine synthase|E|Amino acid transport and metabolism ;	GO:0003824; catalytic activity; Molecular Function	IPR001045; Spermidine/spermine synthases family	NA
LOCMI00403	47.9411	71.5584	55.9383	51.5052	40.092	35.2313	Collagen triple helix repeat	LOCMI00403	NA	NA	NA	NA	NA	IPR008160; Collagen triple helix repeat	NA
LOCMI00404	4.9463	4.50998	12.1387	0	0.113575	0.107086	Endoplasmin	HSP90B1	endoplasmin [Locusta migratoria]	Endoplasmin OS=Bos taurus GN=HSP90B1 PE=2 SV=1	Endoplasmin OS=Locusta migratoria GN=gp96 PE=2 SV=1	COG0326|Molecular chaperone, HSP90 family|O|Posttranslational modification, protein turnover, chaperones ;	GO:0005524; ATP binding; Molecular Function GO:0006457; protein folding; Biological Process GO:0006950; response to stress; Biological Process GO:0051082; unfolded protein binding; Molecular Function	IPR001404; Heat shock protein Hsp90 family IPR015566; Endoplasmin IPR020568; Ribosomal protein S5 domain 2-type fold	NA
LOCMI00405	0	0	0.500566	0	0.4543	0.428344	NA	LOCMI00405	hypothetical protein L798_08877 [Zootermopsis nevadensis]	NA	NA	NA	NA	NA	NA
LOCMI00406	0.570727	0	0.75085	0.932221	0	0	Inter-alpha-trypsin inhibitor heavy chain H5	ITIH5	PREDICTED: inter-alpha-trypsin inhibitor heavy chain H4-like [Bombyx mori]	Inter-alpha-trypsin inhibitor heavy chain H5 OS=Bos taurus GN=ITIH5 PE=2 SV=1	Uncharacterized protein OS=Bombyx mori GN=Bmo.2352 PE=4 SV=1	NA	NA	IPR002035; von Willebrand factor, type A	NA
LOCMI00407	29.2973	42.9952	41.1716	35.1913	39.4105	37.8014	NA	LOCMI00407	hypothetical protein L798_02486 [Zootermopsis nevadensis]	NA	Uncharacterized protein OS=Atta cephalotes PE=4 SV=1	NA	NA	NA	NA
LOCMI00408	2.56827	2.85632	6.13194	3.14625	6.01948	5.24722	LOCMI00408	LOCMI00408	LOCMI00408	LOCMI00408	LOCMI00408	LOCMI00408	LOCMI00408	LOCMI00408	LOCMI00408
LOCMI00409	384.004	499.105	629.838	621.325	637.383	576.016	Guanine nucleotide-binding protein subunit beta-like protein	Rack1	Guanine nucleotide-binding protein subunit beta-like protein [Zootermopsis nevadensis]	Guanine nucleotide-binding protein subunit beta-like protein OS=Drosophila melanogaster GN=Rack1 PE=1 SV=2	Receptor for activated protein kinase C-like OS=Blattella germanica GN=RACK1 PE=2 SV=1	COG2319|FOG: WD40 repeat|R|General function prediction only ;	GO:0005515; protein binding; Molecular Function	IPR001680; WD40 repeat IPR015943; WD40/YVTN repeat-like-containing domain IPR017986; WD40-repeat-containing domain IPR019775; WD40 repeat, conserved site IPR020472; G-protein beta WD-40 repeat	K14753 RACK1; guanine nucleotide-binding protein subunit beta-2-like 1 protein K14753 Human Diseases; Infectious diseases; Measles [PATH:ko05162]
LOCMI00410	0	0	1.5017	0.233055	0.22715	0	HD domain-containing protein 2 homolog	hddc2	predicted protein [Physcomitrella patens] gb|EDQ76478.1| predicted protein [Physcomitrella patens]	HD domain-containing protein 2 homolog OS=Dictyostelium discoideum GN=hddc2 PE=3 SV=1	Predicted protein OS=Physcomitrella patens subsp. patens GN=PHYPADRAFT_120560 PE=4 SV=1	COG1896|Predicted hydrolases of HD superfamily|R|General function prediction only ;	GO:0008081; phosphoric diester hydrolase activity; Molecular Function GO:0046872; metal ion binding; Molecular Function	IPR006674; HD domain	NA
LOCMI00411	0	0	0.125142	0.116528	0	0	TBC1 domain family member 9	Tbc1d9	RabGAP/TBC domain-containing protein [Dictyostelium fasciculatum] gb|EGG18469.1| RabGAP/TBC domain-containing protein [Dictyostelium fasciculatum]	TBC1 domain family member 9 OS=Mus musculus GN=Tbc1d9 PE=2 SV=2	RabGAP/TBC domain-containing protein OS=Dictyostelium fasciculatum (strain SH3) GN=DFA_03963 PE=4 SV=1	COG5210|GTPase-activating protein|R|General function prediction only ;	GO:0005097; Rab GTPase activator activity; Molecular Function GO:0032313; regulation of Rab GTPase activity; Biological Process	IPR000195; Rab-GTPase-TBC domain	NA
LOCMI00412	7.51457	9.62129	8.75991	10.2544	16.1277	18.5259	Multidrug resistance-associated protein 4	ABCC4	Probable multidrug resistance-associated protein lethal(2)03659 [Harpegnathos saltator]	Multidrug resistance-associated protein 4 OS=Homo sapiens GN=ABCC4 PE=1 SV=3	Probable multidrug resistance-associated protein lethal(2)03659 OS=Harpegnathos saltator GN=EAI_10624 PE=3 SV=1	COG1132|ABC-type multidrug transport system, ATPase and permease components|V|Defense mechanisms ;	GO:0005524; ATP binding; Molecular Function GO:0016887; ATPase activity; Molecular Function	IPR003439; ABC transporter-like IPR027417; P-loop containing nucleoside triphosphate hydrolase	NA
LOCMI00413	82.6603	124.475	123.89	71.548	61.6713	62.9666	Basement membrane-specific heparan sulfate proteoglycan core protein	HSPG2	Basement membrane-specific heparan sulfate proteoglycan core protein [Zootermopsis nevadensis]	NA	Basement membrane-specific heparan sulfate proteoglycan core protein (Fragment) OS=Anoplophora glabripennis GN=PGBM PE=4 SV=1	NA	GO:0005515; protein binding; Molecular Function	IPR007110; Immunoglobulin-like domain IPR013783; Immunoglobulin-like fold	NA
LOCMI00414	3.89997	5.71264	8.88505	2.44708	5.33803	2.57007	Mediator of RNA polymerase II transcription subunit 14	MED14	CRSP complex subunit, putative [Pediculus humanus corporis] gb|EEB11666.1| CRSP complex subunit, putative [Pediculus humanus corporis]	Mediator of RNA polymerase II transcription subunit 14 OS=Anopheles gambiae GN=MED14 PE=3 SV=5	CRSP complex subunit, putative OS=Pediculus humanus subsp. corporis GN=Phum_PHUM128490 PE=4 SV=1	NA	NA	NA	NA
LOCMI00415	10.4633	5.11131	9.26048	6.87513	9.88103	7.06768	Ubiquitin-conjugating enzyme E2 S	v1g237158	Ubiquitin-conjugating enzyme E2 S [Zootermopsis nevadensis]	Ubiquitin-conjugating enzyme E2 S OS=Nematostella vectensis GN=v1g237158 PE=3 SV=1	Ubiquitin conjugating enzyme, putative OS=Riptortus pedestris PE=2 SV=1	COG5078|Ubiquitin-protein ligase|O|Posttranslational modification, protein turnover, chaperones ;	GO:0016881; acid-amino acid ligase activity; Molecular Function	IPR000608; Ubiquitin-conjugating enzyme, E2 IPR016135; Ubiquitin-conjugating enzyme/RWD-like IPR023313; Ubiquitin-conjugating enzyme, active site	K10583 UBE2S, E2EPF; ubiquitin-conjugating enzyme E2 S [EC:6.3.2.19] [EC:6.3.2.19] Genetic Information Processing; Folding, sorting and degradation; SNAREs [BR:ko04131] Genetic Information Processing; Folding, sorting and degradation; Ubiquitin mediated proteolysis [PATH:ko04120]
LOCMI00416	5.61215	4.05898	5.50623	4.42805	4.543	3.1055	GPI ethanolamine phosphate transferase 3	PIGO	GPI ethanolamine phosphate transferase 3 [Zootermopsis nevadensis]	GPI ethanolamine phosphate transferase 3 OS=Homo sapiens GN=PIGO PE=1 SV=3	GPI ethanolamine phosphate transferase, putative OS=Pediculus humanus subsp. corporis GN=Phum_PHUM289690 PE=4 SV=1	COG1524|Uncharacterized proteins of the AP superfamily|R|General function prediction only ;	GO:0003824; catalytic activity; Molecular Function GO:0008152; metabolic process; Biological Process	IPR002591; Type I phosphodiesterase/nucleotide pyrophosphatase/phosphate transferase IPR017849; Alkaline phosphatase-like, alpha/beta/alpha IPR017850; Alkaline-phosphatase-like, core domain	K05288 PIGO; phosphatidylinositol glycan, class O K05288 Metabolism; Glycan biosynthesis and metabolism; Glycosylphosphatidylinositol(GPI)-anchor biosynthesis [PATH:ko00563]
LOCMI00417	0	0	1.25142	0	0.567875	0	Putative uncharacterized protein	CSP	hypothetical protein [Locusta migratoria]	NA	Putative uncharacterized protein OS=Locusta migratoria PE=2 SV=1	NA	NA	IPR005055; Insect odorant-binding protein A10/Ejaculatory bulb-specific protein 3	NA
LOCMI00418	0	0.601331	0	0	0.4543	0	LOCMI00418	LOCMI00418	LOCMI00418	LOCMI00418	LOCMI00418	LOCMI00418	LOCMI00418	LOCMI00418	LOCMI00418
LOCMI00419	4.18533	3.00665	3.87939	8.73957	5.79233	7.38894	Protein zer-1 homolog	zer-1	Zer-1-like protein [Zootermopsis nevadensis]	Protein zer-1 homolog OS=Drosophila melanogaster GN=CG12084 PE=2 SV=2	Uncharacterized protein (Fragment) OS=Rhodnius prolixus PE=4 SV=1	NA	NA	NA	NA
LOCMI00420	20.9267	18.6413	11.3879	12.4685	12.7204	13.5999	Leucine carboxyl methyltransferase 1	Lcmt1	Leucine carboxyl methyltransferase 1 [Zootermopsis nevadensis]	Leucine carboxyl methyltransferase 1 OS=Rattus norvegicus GN=Lcmt1 PE=2 SV=1	AAEL004773-PA OS=Aedes aegypti GN=AAEL004773 PE=4 SV=1	NA	GO:0008168; methyltransferase activity; Molecular Function GO:0032259; methylation; Biological Process	IPR007213; Leucine carboxyl methyltransferase	K18203
LOCMI00421	3.23412	2.40532	5.75651	7.22471	7.04165	4.71179	Sulfatase-modifying factor 1	SUMF1	Sulfatase-modifying factor 1 [Zootermopsis nevadensis]	Sulfatase-modifying factor 1 OS=Bos taurus GN=SUMF1 PE=2 SV=1	Uncharacterized protein (Fragment) OS=Anas platyrhynchos GN=SUMF1 PE=4 SV=1	COG1262|Uncharacterized conserved protein|S|Function unknown ;	NA	IPR005532; Formylglycine-generating sulphatase enzyme domain IPR016187; C-type lectin fold	K13444 SUMF1, FGE; sulfatase modifying factor 1 K13444 Cellular Processes; Transport and catabolism; Lysosome [PATH:ko04142]
LOCMI00422	18.5486	19.0923	22.1501	20.2758	20.1028	14.5637	U8 snoRNA-decapping enzyme	NUDT16	NUDIX domain containing protein [Coptotermes formosanus]	U8 snoRNA-decapping enzyme OS=Homalodisca vitripennis GN=NUDT16 PE=1 SV=1	NUDIX domain containing protein OS=Coptotermes formosanus PE=2 SV=1	NA	GO:0016787; hydrolase activity; Molecular Function	IPR000086; NUDIX hydrolase domain IPR015797; NUDIX hydrolase domain-like IPR020084; NUDIX hydrolase, conserved site	K16855 NUDT16; U8 snoRNA-decapping enzyme [EC:3.6.1.62 3.6.1.64] [EC:3.6.1.62 3.6.1.64] Metabolism; Nucleotide metabolism; Purine metabolism [PATH:ko00230] Genetic Information Processing; Folding, sorting and degradation; Proteasome [BR:ko03051] Genetic Information Processing; Folding, sorting and degradation; RNA degradation [PATH:ko03018]
LOCMI00425	0	0	1.25142	0	0.68145	0	Probable RNA 3'-terminal phosphate cyclase-like protein	rcl1	RNA 3'-terminal phosphate cyclase family protein [Dictyostelium fasciculatum] gb|EGG15129.1| RNA 3'-terminal phosphate cyclase family protein [Dictyostelium fasciculatum]	Probable RNA 3'-terminal phosphate cyclase-like protein OS=Dictyostelium discoideum GN=rcl1 PE=1 SV=2	RNA 3'-terminal phosphate cyclase family protein OS=Dictyostelium fasciculatum (strain SH3) GN=rcl1 PE=4 SV=1	NA	GO:0006396; RNA processing; Biological Process	IPR000228; RNA 3'-terminal phosphate cyclase IPR023797; RNA 3'-terminal phosphate cyclase domain	NA
LOCMI00426	13.1267	15.9353	10.0113	12.2354	15.2191	11.5653	Uridine-cytidine kinase-like 1	Uckl1	hypothetical protein L798_10738, partial [Zootermopsis nevadensis]	Uridine-cytidine kinase-like 1 OS=Mus musculus GN=Uckl1 PE=2 SV=1	Uridine kinase OS=Tribolium castaneum GN=TcasGA2_TC011541 PE=3 SV=1	COG0035|Uracil phosphoribosyltransferase|F|Nucleotide transport and metabolism ;	GO:0004849; uridine kinase activity; Molecular Function GO:0005524; ATP binding; Molecular Function GO:0008152; metabolic process; Biological Process GO:0016301; kinase activity; Molecular Function GO:0016773; phosphotransferase activity, alcohol group as acceptor; Molecular Function	IPR000764; Uridine kinase IPR006083; Phosphoribulokinase/uridine kinase IPR027417; P-loop containing nucleoside triphosphate hydrolase	K00876 udk, UCK; uridine kinase [EC:2.7.1.48] [EC:2.7.1.48] Metabolism; Nucleotide metabolism; Pyrimidine metabolism [PATH:ko00240] Metabolism; Xenobiotics biodegradation and metabolism; Drug metabolism - other enzymes [PATH:ko00983]
LOCMI00427	1.42682	0	0.75085	0.699166	1.02218	0.321258	Golgi-associated PDZ and coiled-coil motif-containing protein	Gopc	Golgi-associated PDZ and coiled-coil motif-containing protein [Zootermopsis nevadensis]	Golgi-associated PDZ and coiled-coil motif-containing protein OS=Mus musculus GN=Gopc PE=1 SV=1	Uncharacterized protein OS=Rhodnius prolixus PE=4 SV=1	NA	NA	NA	NA
LOCMI00428	16.9316	9.62129	6.75765	8.38999	3.40725	6.31808	Phosphoenolpyruvate phosphomutase	bcpB	Phosphoenolpyruvate phosphomutase [Crassostrea gigas]	Phosphoenolpyruvate phosphomutase OS=Mytilus edulis PE=1 SV=3	Phosphoenolpyruvate phosphomutase OS=Crassostrea gigas GN=CGI_10022015 PE=4 SV=1	COG2513|PEP phosphonomutase and related enzymes|G|Carbohydrate transport and metabolism ;	GO:0003824; catalytic activity; Molecular Function	IPR015813; Pyruvate/Phosphoenolpyruvate kinase-like domain	K03417 prpB; methylisocitrate lyase [EC:4.1.3.30] [EC:4.1.3.30] Metabolism; Carbohydrate metabolism; Propanoate metabolism [PATH:ko00640]
LOCMI00429	3.04388	2.25499	1.75198	1.63139	4.65658	4.06927	Zinc finger CCHC domain-containing protein 9	ZCCHC9	Zinc finger CCHC domain-containing protein 9 [Zootermopsis nevadensis]	Zinc finger CCHC domain-containing protein 9 OS=Homo sapiens GN=ZCCHC9 PE=2 SV=2	Uncharacterized protein OS=Nasonia vitripennis PE=4 SV=1	COG5082|Arginine methyltransferase-interacting protein, contains RING Zn-finger|OU|Posttranslational modification, protein turnover, chaperones ; Intracellular trafficking, secretion, and vesicular transport ;	GO:0003676; nucleic acid binding; Molecular Function GO:0008270; zinc ion binding; Molecular Function	IPR001878; Zinc finger, CCHC-type	NA
LOCMI00430	4.56582	7.21597	5.25595	8.04041	10.2218	6.21099	LOCMI00430	LOCMI00430	LOCMI00430	LOCMI00430	LOCMI00430	LOCMI00430	LOCMI00430	LOCMI00430	LOCMI00430
LOCMI00431	0	0.150333	0.375425	0.233055	0	0.214172	Protein will die slowly	wds	Protein will die slowly [Zootermopsis nevadensis]	Protein will die slowly OS=Drosophila melanogaster GN=wds PE=1 SV=1	Protein will die slowly OS=Harpegnathos saltator GN=EAI_14893 PE=4 SV=1	COG2319|FOG: WD40 repeat|R|General function prediction only ;	GO:0005515; protein binding; Molecular Function	IPR001680; WD40 repeat IPR015943; WD40/YVTN repeat-like-containing domain IPR017986; WD40-repeat-containing domain IPR019775; WD40 repeat, conserved site IPR020472; G-protein beta WD-40 repeat	K14963
LOCMI00432	3.51948	2.25499	4.88052	3.14625	2.61223	2.99841	Protein singed	sn	Protein singed [Zootermopsis nevadensis]	Protein singed OS=Drosophila melanogaster GN=sn PE=3 SV=1	Protein singed, putative OS=Pediculus humanus subsp. corporis GN=Phum_PHUM082950 PE=4 SV=1	NA	GO:0030674; protein binding, bridging; Molecular Function GO:0051015; actin filament binding; Molecular Function	IPR008999; Actin cross-linking IPR010431; Fascin IPR022768; Fascin domain	K17455
LOCMI00433	1.3317	1.35299	1.75198	2.21403	4.20228	0.963774	LOCMI00433	LOCMI00433	LOCMI00433	LOCMI00433	LOCMI00433	LOCMI00433	LOCMI00433	LOCMI00433	LOCMI00433
LOCMI00434	21.4023	21.7982	30.034	22.9559	22.6014	25.9148	Bystin	BYSL	Bystin [Zootermopsis nevadensis]	Bystin OS=Bos taurus GN=BYSL PE=2 SV=1	Bystin OS=Harpegnathos saltator GN=EAI_15283 PE=4 SV=1	NA	NA	IPR007955; Bystin	K14797
LOCMI00435	0	0	0.875991	0.233055	0.113575	0	Proton-coupled amino acid transporter 4	slc36a4	conserved hypothetical protein [Capsaspora owczarzaki ATCC 30864] gb|EFW39730.1| hypothetical protein CAOG_00255 [Capsaspora owczarzaki ATCC 30864]	Proton-coupled amino acid transporter 4 OS=Xenopus laevis GN=slc36a4 PE=2 SV=1	Uncharacterized protein OS=Capsaspora owczarzaki (strain ATCC 30864) GN=CAOG_00255 PE=4 SV=1	COG0814|Amino acid permeases|E|Amino acid transport and metabolism ;	NA	IPR013057; Amino acid transporter, transmembrane	K14209
LOCMI00436	5.23166	4.35965	5.63137	3.14625	1.59005	4.17636	LOCMI00436	LOCMI00436	LOCMI00436	LOCMI00436	LOCMI00436	LOCMI00436	LOCMI00436	LOCMI00436	LOCMI00436
LOCMI00438	7.13409	7.96763	7.63364	10.371	7.15523	11.0299	HEAT repeat-containing protein 6	heatr6	HEAT repeat-containing protein 6 [Zootermopsis nevadensis]	HEAT repeat-containing protein 6 OS=Danio rerio GN=heatr6 PE=2 SV=1	Putative uncharacterized protein OS=Tribolium castaneum GN=TcasGA2_TC006523 PE=4 SV=1	NA	GO:0005488; binding; Molecular Function	IPR011989; Armadillo-like helical IPR016024; Armadillo-type fold	NA
LOCMI00439	0	0.901996	0	0	0	0	Tetratricopeptide repeat protein 39C	Ttc39c	Tetratricopeptide repeat protein 39C [Zootermopsis nevadensis]	NA	Uncharacterized protein (Fragment) OS=Rhodnius prolixus PE=4 SV=1	NA	NA	NA	NA
LOCMI00440	0	0.751664	0.625708	1.74791	3.40725	1.07086	NA	LOCMI00440	hypothetical protein KGM_00539 [Danaus plexippus]	NA	Uncharacterized protein OS=Danaus plexippus GN=KGM_00539 PE=4 SV=1	NA	NA	NA	NA
LOCMI00441	1.3317	1.95433	1.37656	1.98097	2.15793	1.60629	Tubulin delta chain	tubd1	PREDICTED: tubulin delta chain-like [Nasonia vitripennis]	Tubulin delta chain OS=Xenopus tropicalis GN=tubd1 PE=2 SV=1	Uncharacterized protein OS=Nasonia vitripennis PE=3 SV=1	COG5023|Tubulin|Z|Cytoskeleton ;	GO:0003924; GTPase activity; Molecular Function GO:0005200; structural constituent of cytoskeleton; Molecular Function GO:0005525; GTP binding; Molecular Function GO:0005874; microtubule; Cellular Component GO:0006184; GTP catabolic process; Biological Process GO:0007017; microtubule-based process; Biological Process GO:0043234; protein complex; Cellular Component GO:0051258; protein polymerizati…	IPR000217; Tubulin IPR002967; Delta tubulin IPR003008; Tubulin/FtsZ, GTPase domain IPR008280; Tubulin/FtsZ, C-terminal IPR017975; Tubulin, conserved site IPR023123; Tubulin, C-terminal	K10390
LOCMI00442	1.42682	1.20266	53.6858	227.462	244.527	210.638	NA	LOCMI00442	hypothetical protein L798_07455 [Zootermopsis nevadensis]	NA	NA	NA	NA	NA	NA
LOCMI00443	0.85609	0	0	0	0	0	LOCMI00443	LOCMI00443	LOCMI00443	LOCMI00443	LOCMI00443	LOCMI00443	LOCMI00443	LOCMI00443	LOCMI00443
LOCMI00445	1.04633	4.20932	3.12854	2.21403	2.49865	1.17795	Glutamate dehydrogenase, mitochondrial	Gdh	Glutamate dehydrogenase, mitochondrial, partial [Zootermopsis nevadensis]	Glutamate dehydrogenase, mitochondrial OS=Drosophila melanogaster GN=Gdh PE=1 SV=2	Glutamate dehydrogenase OS=Danaus plexippus GN=KGM_20500 PE=4 SV=1	COG0334|Glutamate dehydrogenase/leucine dehydrogenase|E|Amino acid transport and metabolism ;	GO:0006520; cellular amino acid metabolic process; Biological Process GO:0016491; oxidoreductase activity; Molecular Function GO:0055114; oxidation-reduction process; Biological Process	IPR006095; Glutamate/phenylalanine/leucine/valine dehydrogenase IPR006097; Glutamate/phenylalanine/leucine/valine dehydrogenase, dimerisation domain	NA
LOCMI00447	0.570727	0.901996	1.5017	1.39833	2.83938	1.71338	TBC1 domain family member 16	TBC1D16	hypothetical protein AND_005999 [Anopheles darlingi]	TBC1 domain family member 16 OS=Homo sapiens GN=TBC1D16 PE=2 SV=1	Uncharacterized protein OS=Anopheles darlingi GN=AND_005999 PE=4 SV=1	COG5210|GTPase-activating protein|R|General function prediction only ;	GO:0005097; Rab GTPase activator activity; Molecular Function GO:0032313; regulation of Rab GTPase activity; Biological Process	IPR000195; Rab-GTPase-TBC domain	NA
LOCMI00448	0	0	0	1.04875	0.68145	0.321258	LOCMI00448	LOCMI00448	LOCMI00448	LOCMI00448	LOCMI00448	LOCMI00448	LOCMI00448	LOCMI00448	LOCMI00448
LOCMI00449	14.4584	17.1379	11.2627	16.0808	19.9892	15.8487	Low molecular weight phosphotyrosine protein phosphatase 1	primo-1	Low molecular weight phosphotyrosine protein phosphatase [Zootermopsis nevadensis]	Low molecular weight phosphotyrosine protein phosphatase 1 OS=Drosophila melanogaster GN=primo-1 PE=2 SV=1	Acid phosphatase isoenzyme OS=Danaus plexippus GN=KGM_16787 PE=4 SV=1	COG0394|Protein-tyrosine-phosphatase|T|Signal transduction mechanisms ;	GO:0004725; protein tyrosine phosphatase activity; Molecular Function GO:0006470; protein dephosphorylation; Biological Process	IPR017867; Protein-tyrosine phosphatase, low molecular weight IPR023485; Phosphotyrosine protein phosphatase I superfamily	K14394 ACP1; low molecular weight phosphotyrosine protein phosphatase [EC:3.1.3.2 3.1.3.48] [EC:3.1.3.2 3.1.3.48] Metabolism; Metabolism of cofactors and vitamins; Riboflavin metabolism [PATH:ko00740]
LOCMI00450	0	0	0	0	0	0	LOCMI00450	LOCMI00450	LOCMI00450	LOCMI00450	LOCMI00450	LOCMI00450	LOCMI00450	LOCMI00450	LOCMI00450
LOCMI00452	0	0	0	0	0.22715	0	LOCMI00452	LOCMI00452	LOCMI00452	LOCMI00452	LOCMI00452	LOCMI00452	LOCMI00452	LOCMI00452	LOCMI00452
LOCMI00453	2.28291	0.450998	2.00227	2.21403	2.38508	2.57007	LOCMI00453	LOCMI00453	LOCMI00453	LOCMI00453	LOCMI00453	LOCMI00453	LOCMI00453	LOCMI00453	LOCMI00453
LOCMI00454	3.139	3.90865	1.62684	0	0.113575	0	Clathrin heavy chain 1	CLTC	clathrin, partial [Locusta migratoria]	Clathrin heavy chain 1 OS=Bos taurus GN=CLTC PE=1 SV=1	Clathrin (Fragment) OS=Locusta migratoria PE=2 SV=1	NA	GO:0005198; structural molecule activity; Molecular Function GO:0006886; intracellular protein transport; Biological Process GO:0016192; vesicle-mediated transport; Biological Process GO:0030130; clathrin coat of trans-Golgi network vesicle; Cellular Component GO:0030132; clathrin coat of coated pit; Cellular Component	IPR001473; Clathrin, heavy chain, propeller, N-terminal IPR016025; Clathrin, heavy chain, linker/propeller domain IPR022365; Clathrin, heavy chain, propeller repeat	NA
LOCMI00456	0	0	0.375425	0	0	0	Cytoplasmic tRNA 2-thiolation protein 1	NCS6	hypothetical protein ARALYDRAFT_483552 [Arabidopsis lyrata subsp. lyrata] gb|EFH58214.1| hypothetical protein ARALYDRAFT_483552 [Arabidopsis lyrata subsp. lyrata]	Cytoplasmic tRNA 2-thiolation protein 1 OS=Arabidopsis thaliana GN=NCS6 PE=2 SV=2	Cytoplasmic tRNA 2-thiolation protein 1 OS=Arabidopsis lyrata subsp. lyrata GN=NCS6 PE=3 SV=1	COG0037|Predicted ATPase of the PP-loop superfamily implicated in cell cycle control|D|Cell cycle control, cell division, chromosome partitioning ;	NA	NA	NA
LOCMI00457	0.665848	0	0	0	0.4543	0	Multidrug resistance-associated protein 4	ABCC4	PREDICTED: probable multidrug resistance-associated protein lethal(2)03659 [Nasonia vitripennis]	Multidrug resistance-associated protein 4 OS=Homo sapiens GN=ABCC4 PE=1 SV=3	Uncharacterized protein OS=Nasonia vitripennis PE=3 SV=1	COG1132|ABC-type multidrug transport system, ATPase and permease components|V|Defense mechanisms ;	GO:0005524; ATP binding; Molecular Function GO:0016887; ATPase activity; Molecular Function	IPR003439; ABC transporter-like IPR027417; P-loop containing nucleoside triphosphate hydrolase	NA
LOCMI00458	0.665848	0	0	3.02972	0	0	Transporter	LOCMI00458	PREDICTED: uncharacterized protein LOC100874645 [Megachile rotundata]	NA	Transporter OS=Acromyrmex echinatior GN=G5I_09194 PE=3 SV=1	NA	NA	NA	NA
LOCMI00459	1.42682	0.300665	0	0	0.4543	0.214172	Midasin	MDN1	PREDICTED: midasin-like [Oryzias latipes]	Midasin OS=Homo sapiens GN=MDN1 PE=1 SV=2	Midasin OS=Oryzias latipes PE=3 SV=1	COG5271|AAA ATPase containing von Willebrand factor type A (vWA) domain|R|General function prediction only ;	NA	NA	NA
LOCMI00460	10.2731	14.8829	18.3958	16.78	7.15523	9.959	Mitochondrial enolase superfamily member 1	enosf1	Mitochondrial enolase superfamily member 1 [Zootermopsis nevadensis]	Mitochondrial enolase superfamily member 1 OS=Xenopus laevis GN=enosf1 PE=2 SV=1	Mitochondrial enolase superfamily member OS=Anoplophora glabripennis GN=ENOF1 PE=4 SV=1	COG4948|L-alanine-DL-glutamate epimerase and related enzymes of enolase superfamily|MR|Cell wall/membrane/envelope biogenesis ; General function prediction only ;	GO:0003824; catalytic activity; Molecular Function GO:0008152; metabolic process; Biological Process	IPR001354; Mandelate racemase/muconate lactonizing enzyme IPR013342; Mandelate racemase/muconate lactonizing enzyme, C-terminal	K18334
LOCMI00462	4.66094	7.06564	3.50397	3.96194	2.95295	5.03304	Putative uncharacterized protein	LOCMI00462	PREDICTED: uncharacterized protein LOC657912 isoform X4 [Tribolium castaneum]	NA	Putative uncharacterized protein OS=Tribolium castaneum GN=TcasGA2_TC001711 PE=4 SV=1	NA	NA	NA	NA
LOCMI00463	1.90242	3.75832	2.87826	3.3793	2.38508	3.1055	Tetratricopeptide repeat protein 17	TTC17	Tetratricopeptide repeat protein 17 [Zootermopsis nevadensis]	Tetratricopeptide repeat protein 17 OS=Homo sapiens GN=TTC17 PE=2 SV=1	Putative uncharacterized protein OS=Ixodes scapularis GN=IscW_ISCW009190 PE=4 SV=1	COG0457|FOG: TPR repeat|R|General function prediction only ;	GO:0005515; protein binding; Molecular Function	IPR001440; Tetratricopeptide TPR1 IPR011990; Tetratricopeptide-like helical IPR013026; Tetratricopeptide repeat-containing domain IPR019734; Tetratricopeptide repeat	NA
LOCMI00464	0.285363	0	0	0	0	0	LOCMI00464	LOCMI00464	LOCMI00464	LOCMI00464	LOCMI00464	LOCMI00464	LOCMI00464	LOCMI00464	LOCMI00464
LOCMI00465	0.475606	0.300665	0.875991	0.233055	0	0	UDP-glucuronosyltransferase 3A1	UGT3A1	UDP-glucuronosyltransferase 2B1, partial [Zootermopsis nevadensis]	UDP-glucuronosyltransferase 3A1 OS=Bos taurus GN=UGT3A1 PE=2 SV=1	Glucosyl/glucuronosyl transferase (Fragment) OS=Coptotermes formosanus PE=2 SV=1	NA	GO:0008152; metabolic process; Biological Process GO:0016758; transferase activity, transferring hexosyl groups; Molecular Function	IPR002213; UDP-glucuronosyl/UDP-glucosyltransferase	NA
LOCMI00466	0.380485	0.300665	0	0.233055	0.22715	0.428344	Proteasome subunit beta type-1	Prosbeta6	Proteasome subunit beta type-1 [Zootermopsis nevadensis]	Proteasome subunit beta type-1 OS=Drosophila melanogaster GN=Prosbeta6 PE=2 SV=2	Uncharacterized protein (Fragment) OS=Dendroctonus ponderosae GN=D910_10557 PE=4 SV=1	COG0638|20S proteasome, alpha and beta subunits|O|Posttranslational modification, protein turnover, chaperones ;	GO:0004298; threonine-type endopeptidase activity; Molecular Function GO:0005839; proteasome core complex; Cellular Component GO:0051603; proteolysis involved in cellular protein catabolic process; Biological Process	IPR001353; Proteasome, subunit alpha/beta IPR023333; Proteasome B-type subunit	NA
LOCMI00467	12.4609	10.2226	13.8907	19.3436	12.7204	15.2062	Fibronectin type-III domain-containing protein 3A	Fndc3a	Fibronectin type-III domain-containing protein 3a [Zootermopsis nevadensis]	Fibronectin type-III domain-containing protein 3A OS=Mus musculus GN=Fndc3a PE=1 SV=3	Putative uncharacterized protein OS=Tribolium castaneum GN=TcasGA2_TC010469 PE=4 SV=1	NA	GO:0005515; protein binding; Molecular Function	IPR003961; Fibronectin, type III IPR013783; Immunoglobulin-like fold	NA
LOCMI00469	0	0	102.616	2585.28	388.2	221.347	Putative uncharacterized protein	LOCMI00469	hypothetical protein DAPPUDRAFT_229131 [Daphnia pulex]	NA	Putative uncharacterized protein OS=Daphnia pulex GN=DAPPUDRAFT_229131 PE=4 SV=1	NA	NA	NA	NA
LOCMI00470	24.5413	25.2559	40.0453	29.598	28.1666	23.5589	Peroxisomal (S)-2-hydroxy-acid oxidase GLO1	GLO1	Hydroxyacid oxidase 1 [Zootermopsis nevadensis]	Peroxisomal (S)-2-hydroxy-acid oxidase GLO1 OS=Oryza sativa subsp. japonica GN=GLO1 PE=1 SV=1	AAEL004676-PA OS=Aedes aegypti GN=AAEL004676 PE=4 SV=1	COG1304|L-lactate dehydrogenase (FMN-dependent) and related alpha-hydroxy acid dehydrogenases|C|Energy production and conversion ;	GO:0003824; catalytic activity; Molecular Function GO:0010181; FMN binding; Molecular Function GO:0016491; oxidoreductase activity; Molecular Function GO:0055114; oxidation-reduction process; Biological Process	IPR000262; FMN-dependent dehydrogenase IPR008259; FMN-dependent alpha-hydroxy acid dehydrogenase, active site IPR012133; Alpha-hydroxy acid dehydrogenase, FMN-dependent IPR013785; Aldolase-type TIM barrel	K11517 HAO; (S)-2-hydroxy-acid oxidase [EC:1.1.3.15] [EC:1.1.3.15] Metabolism; Carbohydrate metabolism; Glyoxylate and dicarboxylate metabolism [PATH:ko00630] Cellular Processes; Transport and catabolism; Peroxisome [PATH:ko04146]
LOCMI00471	0	0	0	0.233055	0	0	WD repeat-containing protein 81	WDR81	WD repeat-containing protein 81 [Zootermopsis nevadensis]	NA	Putative uncharacterized protein OS=Pediculus humanus subsp. corporis GN=Phum_PHUM422060 PE=4 SV=1	NA	NA	NA	NA
LOCMI00472	16.0755	15.0333	22.9009	25.7526	32.8232	18.5259	Protein lunapark-B	lnpb	PREDICTED: protein lunapark-B-like isoform X1 [Apis mellifera]	Protein lunapark-B OS=Danio rerio GN=lnpb PE=2 SV=2	Protein lunapark-B OS=Camponotus floridanus GN=EAG_08059 PE=4 SV=1	COG5415|Predicted integral membrane metal-binding protein|R|General function prediction only ;	NA	IPR019273; Domain of unknown function DUF2296	NA
LOCMI00473	0	0	0.125142	0.233055	0	0	Probable ATP-dependent RNA helicase DDX11	Ddx11	Putative ATP-dependent RNA helicase DDX11 [Crassostrea gigas]	Probable ATP-dependent RNA helicase DDX11 OS=Mus musculus GN=Ddx11 PE=2 SV=1	Uncharacterized protein OS=Apis mellifera PE=4 SV=1	COG1199|Rad3-related DNA helicases|KL|Transcription ; Replication, recombination and repair ;	GO:0003676; nucleic acid binding; Molecular Function GO:0003677; DNA binding; Molecular Function GO:0004003; ATP-dependent DNA helicase activity; Molecular Function GO:0005524; ATP binding; Molecular Function GO:0006139; nucleobase-containing compound metabolic process; Biological Process GO:0008026; ATP-dependent helicase activity; Molecular Function GO:0016817; hydrolase activity, acting on aci…	IPR006554; Helicase-like, DEXD box c2 type IPR006555; ATP-dependent helicase, C-terminal IPR010614; DEAD2 IPR013020; DNA helicase (DNA repair), Rad3 type IPR014013; Helicase, superfamily 1/2, ATP-binding domain, DinG/Rad3-type IPR027076; ATP-dependent RNA helicase CHL1	NA
LOCMI00474	0	0	0	0	0	0	Beta-glucosidase	bglA	Lactase-phlorizin hydrolase [Acromyrmex echinatior]	Beta-glucosidase OS=Bacillus circulans GN=bglA PE=1 SV=3	Uncharacterized protein OS=Atta cephalotes PE=4 SV=1	COG2723|Beta-glucosidase/6-phospho-beta-glucosidase/beta-galactosidase|G|Carbohydrate transport and metabolism ;	GO:0004553; hydrolase activity, hydrolyzing O-glycosyl compounds; Molecular Function GO:0005975; carbohydrate metabolic process; Biological Process	IPR001360; Glycoside hydrolase, family 1 IPR013781; Glycoside hydrolase, catalytic domain IPR017853; Glycoside hydrolase, superfamily	NA
LOCMI00475	1.14145	0.601331	1.00113	2.44708	0.4543	0.856688	AAEL010685-PA	LOCMI00475	hypothetical protein AaeL_AAEL010685 [Aedes aegypti] gb|EAT37302.1| AAEL010685-PA [Aedes aegypti]	NA	AAEL010685-PA OS=Aedes aegypti GN=AAEL010685 PE=4 SV=1	NA	NA	IPR000859; CUB domain	NA
LOCMI00476	7.70481	3.30732	4.00453	7.80735	11.3575	12.5291	HIT-like domain	LOCMI00476	hypothetical protein L798_08790 [Zootermopsis nevadensis]	NA	Uncharacterized protein OS=Strigamia maritima PE=4 SV=1	NA	GO:0003824; catalytic activity; Molecular Function	IPR011146; HIT-like domain	NA
LOCMI00477	1.04633	2.25499	0.250283	1.74791	1.02218	1.82046	Phosphorylated CTD-interacting factor 1	PCIF1	Phosphorylated CTD-interacting factor, putative [Pediculus humanus corporis] gb|EEB18306.1| Phosphorylated CTD-interacting factor, putative [Pediculus humanus corporis]	Phosphorylated CTD-interacting factor 1 OS=Homo sapiens GN=PCIF1 PE=1 SV=1	Phosphorylated CTD-interacting factor, putative OS=Pediculus humanus subsp. corporis GN=Phum_PHUM509410 PE=4 SV=1	NA	GO:0005515; protein binding; Molecular Function	IPR001202; WW domain	NA
LOCMI00478	0	0	0	0	0	0	LOCMI00478	LOCMI00478	LOCMI00478	LOCMI00478	LOCMI00478	LOCMI00478	LOCMI00478	LOCMI00478	LOCMI00478
LOCMI00479	0.380485	1.05233	0	0.815694	2.04435	0	Ankyrin repeat domain-containing protein 6	ANKRD6	Ankyrin repeat domain-containing protein 6 [Zootermopsis nevadensis]	NA	Putative uncharacterized protein OS=Tribolium castaneum GN=TcasGA2_TC006777 PE=4 SV=1	NA	NA	IPR020683; Ankyrin repeat-containing domain	NA
LOCMI00480	2.66339	3.00665	5.63137	4.77763	7.49595	7.7102	Flavin-containing monooxygenase FMO GS-OX5	FMOGS-OX5	Flavin-containing monooxygenase FMO GS-OX3 [Zootermopsis nevadensis]	Flavin-containing monooxygenase FMO GS-OX5 OS=Arabidopsis thaliana GN=FMOGS-OX5 PE=2 SV=2	Senecionine N-oxygenase, putative OS=Pediculus humanus subsp. corporis GN=Phum_PHUM490630 PE=4 SV=1	COG2072|Predicted flavoprotein involved in K+ transport|P|Inorganic ion transport and metabolism ;	GO:0004499; N,N-dimethylaniline monooxygenase activity; Molecular Function GO:0050660; flavin adenine dinucleotide binding; Molecular Function GO:0050661; NADP binding; Molecular Function GO:0055114; oxidation-reduction process; Biological Process	IPR000960; Flavin monooxygenase FMO IPR020946; Flavin monooxygenase-like	NA
LOCMI00481	0	0	0.375425	0.116528	0	0	Kinesin-3	ATK3	Kinesin, motor region domain-containing protein [Rozella allomycis CSF55]	Kinesin-3 OS=Arabidopsis thaliana GN=ATK3 PE=2 SV=1	Kinesin-1 OS=Capsaspora owczarzaki (strain ATCC 30864) GN=CAOG_07549 PE=3 SV=2	COG5059|Kinesin-like protein|Z|Cytoskeleton ;	GO:0003777; microtubule motor activity; Molecular Function GO:0005524; ATP binding; Molecular Function GO:0005871; kinesin complex; Cellular Component GO:0007018; microtubule-based movement; Biological Process GO:0008017; microtubule binding; Molecular Function	IPR001752; Kinesin, motor domain IPR027417; P-loop containing nucleoside triphosphate hydrolase IPR027640; Kinesin-like protein	K10405
LOCMI00482	11.9853	14.8829	14.0159	9.08916	9.99461	10.1732	Xenotropic and polytropic retrovirus receptor 1 homolog	xpr1	Xenotropic and polytropic retrovirus receptor 1-like protein [Zootermopsis nevadensis]	Xenotropic and polytropic retrovirus receptor 1 homolog OS=Xenopus laevis GN=xpr1 PE=2 SV=1	Putative uncharacterized protein OS=Tribolium castaneum GN=TcasGA2_TC002557 PE=4 SV=1	NA	NA	IPR004331; SPX, N-terminal	NA
LOCMI00483	8.5609	17.8896	17.5198	9.20568	7.60953	7.92437	ATP-binding cassette sub-family B member 10, mitochondrial	ABCB10	ATP-binding cassette sub-family B member 10, mitochondrial [Zootermopsis nevadensis]	ATP-binding cassette sub-family B member 10, mitochondrial OS=Homo sapiens GN=ABCB10 PE=1 SV=2	Putative uncharacterized protein GLEAN_08383 OS=Tribolium castaneum GN=GLEAN_08383 PE=3 SV=1	COG1132|ABC-type multidrug transport system, ATPase and permease components|V|Defense mechanisms ;	GO:0005524; ATP binding; Molecular Function GO:0016887; ATPase activity; Molecular Function	IPR003439; ABC transporter-like IPR027417; P-loop containing nucleoside triphosphate hydrolase	NA
LOCMI00484	14.7438	18.3406	9.6359	14.6825	15.5598	11.8866	Retinol dehydrogenase 12	RDH12	Retinol dehydrogenase 13 [Zootermopsis nevadensis]	Retinol dehydrogenase 12 OS=Homo sapiens GN=RDH12 PE=1 SV=3	GF13188 OS=Drosophila ananassae GN=Dana\GF13188 PE=3 SV=1	COG1028|Dehydrogenases with different specificities (related to short-chain alcohol dehydrogenases)|IQR|Lipid transport and metabolism ; Secondary metabolites biosynthesis, transport and catabolism ; General function prediction only ;	GO:0008152; metabolic process; Biological Process GO:0016491; oxidoreductase activity; Molecular Function	IPR002198; Short-chain dehydrogenase/reductase SDR IPR002347; Glucose/ribitol dehydrogenase IPR016040; NAD(P)-binding domain	NA
LOCMI00485	5.51703	6.76497	1.87712	2.0975	3.74798	5.14013	HIV Tat-specific factor 1	HTATSF1	HIV Tat-specific factor 1-like protein [Zootermopsis nevadensis]	HIV Tat-specific factor 1 OS=Homo sapiens GN=HTATSF1 PE=1 SV=1	Uncharacterized protein OS=Rhodnius prolixus PE=4 SV=1	NA	GO:0000166; nucleotide binding; Molecular Function GO:0003676; nucleic acid binding; Molecular Function	IPR000504; RNA recognition motif domain IPR003954; RNA recognition motif domain, eukaryote IPR012677; Nucleotide-binding, alpha-beta plait	K13093
LOCMI00486	7.99018	6.01331	7.00793	8.27346	4.77015	5.78265	Alpha/beta hydrolase domain-containing protein 13	ABHD13	Abhydrolase domain-containing protein 13 [Zootermopsis nevadensis]	Alpha/beta hydrolase domain-containing protein 13 OS=Gallus gallus GN=ABHD13 PE=2 SV=1	Protein bem46, putative OS=Pediculus humanus subsp. corporis GN=Phum_PHUM538000 PE=4 SV=1	COG1073|Hydrolases of the alpha/beta superfamily|R|General function prediction only ;	NA	NA	K06889
LOCMI00487	0	0	0	0	0	0.53543	LOCMI00487	LOCMI00487	LOCMI00487	LOCMI00487	LOCMI00487	LOCMI00487	LOCMI00487	LOCMI00487	LOCMI00487
LOCMI00488	0.380485	0	0.125142	0.349583	0.113575	0	Bloom syndrome protein-like protein	BLM	Bloom syndrome protein-like protein [Zootermopsis nevadensis]	NA	NA	NA	NA	NA	NA
LOCMI00489	4619.75	6448.22	6628.63	3896.92	3717.88	3410.9	Mitochondrial-processing peptidase subunit beta	PMPCB	Mitochondrial-processing peptidase subunit beta [Zootermopsis nevadensis]	Mitochondrial-processing peptidase subunit beta OS=Bos taurus GN=PMPCB PE=2 SV=1	Insulinase (Peptidase family M16) OS=Musca domestica PE=2 SV=1	COG0612|Predicted Zn-dependent peptidases|R|General function prediction only ;	GO:0003824; catalytic activity; Molecular Function GO:0004222; metalloendopeptidase activity; Molecular Function GO:0006508; proteolysis; Biological Process GO:0046872; metal ion binding; Molecular Function	IPR001431; Peptidase M16, zinc-binding site IPR007863; Peptidase M16, C-terminal domain IPR011237; Peptidase M16 domain IPR011249; Metalloenzyme, LuxS/M16 peptidase-like IPR011765; Peptidase M16, N-terminal	K17732
LOCMI00490	53.9337	122.671	87.7243	83.4338	60.9898	63.3949	LOCMI00490	LOCMI00490	LOCMI00490	LOCMI00490	LOCMI00490	LOCMI00490	LOCMI00490	LOCMI00490	LOCMI00490
LOCMI00491	2.66339	9.62129	2.75312	8.15694	22.8286	8.24563	LOCMI00491	LOCMI00491	LOCMI00491	LOCMI00491	LOCMI00491	LOCMI00491	LOCMI00491	LOCMI00491	LOCMI00491
LOCMI00492	0	0	0	0	0	0	LOCMI00492	LOCMI00492	LOCMI00492	LOCMI00492	LOCMI00492	LOCMI00492	LOCMI00492	LOCMI00492	LOCMI00492
LOCMI00494	0	0.601331	0.500566	2.0975	0.4543	0	Tubulin beta chain	TUBB	Tubulin beta chain [Lepeophtheirus salmonis]	Tubulin beta chain OS=Pseudopleuronectes americanus PE=2 SV=1	Tubulin beta chain OS=Lepeophtheirus salmonis GN=TBB PE=2 SV=1	COG5023|Tubulin|Z|Cytoskeleton ;	GO:0003924; GTPase activity; Molecular Function GO:0005525; GTP binding; Molecular Function GO:0005874; microtubule; Cellular Component GO:0006184; GTP catabolic process; Biological Process GO:0007017; microtubule-based process; Biological Process GO:0043234; protein complex; Cellular Component GO:0051258; protein polymerization; Biological Process	IPR000217; Tubulin IPR008280; Tubulin/FtsZ, C-terminal IPR018316; Tubulin/FtsZ, 2-layer sandwich domain	NA
LOCMI00495	0	0	0.250283	0	0	0	Anaphase-promoting complex subunit cdc20	cdc20	PREDICTED: cell division cycle protein 20 homolog [Tribolium castaneum] gb|EEZ98810.1| hypothetical protein TcasGA2_TC001383 [Tribolium castaneum]	Anaphase-promoting complex subunit cdc20 OS=Dictyostelium discoideum GN=cdc20 PE=1 SV=1	Putative uncharacterized protein OS=Tribolium castaneum GN=TcasGA2_TC001383 PE=4 SV=1	COG2319|FOG: WD40 repeat|R|General function prediction only ;	GO:0005515; protein binding; Molecular Function	IPR001680; WD40 repeat IPR015943; WD40/YVTN repeat-like-containing domain IPR017986; WD40-repeat-containing domain	NA
LOCMI00496	0	0	0.75085	0	0	0	Nucleolar GTP-binding protein 1	GTPBP1	hypothetical protein EUTSA_v10006811mg [Eutrema salsugineum] gb|ESQ36452.1| hypothetical protein EUTSA_v10006811mg [Eutrema salsugineum]	Nucleolar GTP-binding protein 1 OS=Arabidopsis thaliana GN=At1g50920 PE=2 SV=1	Uncharacterized protein OS=Thellungiella salsuginea GN=EUTSA_v10006811mg PE=4 SV=1	COG1084|Predicted GTPase|R|General function prediction only ;	GO:0005525; GTP binding; Molecular Function	IPR010674; Nucleolar GTP-binding protein 1, Rossman-fold domain IPR012973; NOG, C-terminal IPR027417; P-loop containing nucleoside triphosphate hydrolase	NA
LOCMI00498	26.9193	31.2692	34.9145	36.3566	33.1639	37.4801	Putative uncharacterized protein	LOCMI00498	PREDICTED: uncharacterized protein LOC657715 isoform X1 [Tribolium castaneum] gb|EFA00870.1| hypothetical protein TcasGA2_TC003773 [Tribolium castaneum]	NA	Putative uncharacterized protein OS=Tribolium castaneum GN=TcasGA2_TC003773 PE=4 SV=1	NA	NA	IPR011038; Calycin-like	NA
LOCMI00499	0.665848	0.601331	0.500566	1.2818	0.4543	1.17795	LOCMI00499	LOCMI00499	LOCMI00499	LOCMI00499	LOCMI00499	LOCMI00499	LOCMI00499	LOCMI00499	LOCMI00499
LOCMI00500	0.0951212	0.150333	0	0.116528	0	0	LOCMI00500	LOCMI00500	LOCMI00500	LOCMI00500	LOCMI00500	LOCMI00500	LOCMI00500	LOCMI00500	LOCMI00500
LOCMI00501	0	0	0	0	0	0	LOCMI00501	LOCMI00501	LOCMI00501	LOCMI00501	LOCMI00501	LOCMI00501	LOCMI00501	LOCMI00501	LOCMI00501
LOCMI00502	200.611	305.626	248.656	236.435	241.006	204.32	40S ribosomal protein S21	RpS21	40S ribosomal protein S21 [Zootermopsis nevadensis]	40S ribosomal protein S21 OS=Biphyllus lunatus GN=RpS21 PE=3 SV=1	40S ribosomal protein S21 OS=Pediculus humanus subsp. corporis GN=Phum_PHUM001040 PE=3 SV=1	NA	GO:0003735; structural constituent of ribosome; Molecular Function GO:0005622; intracellular; Cellular Component GO:0005840; ribosome; Cellular Component GO:0006412; translation; Biological Process	IPR001931; Ribosomal protein S21e	K02971 RP-S21e, RPS21; small subunit ribosomal protein S21e K02971 Genetic Information Processing; Translation; Ribosome [PATH:ko03010]
LOCMI00503	19.595	27.6612	23.0261	25.17	20.5571	20.7747	Gem-associated protein 7	GEMIN7	PREDICTED: gem-associated protein 7-like [Megachile rotundata]	Gem-associated protein 7 OS=Homo sapiens GN=GEMIN7 PE=1 SV=1	Uncharacterized protein OS=Apis mellifera GN=LOC726546 PE=4 SV=1	NA	GO:0032797; SMN complex; Cellular Component	IPR020338; SMN complex, gem-associated protein 7	K13135 GEMIN7, SIP3; gem associated protein 7 K13135 Genetic Information Processing; Translation; RNA transport [PATH:ko03013]
LOCMI00505	8.18042	10.5233	7.63364	4.77763	5.56518	7.38894	U3 small nucleolar ribonucleoprotein protein IMP4	Imp4	PREDICTED: U3 small nucleolar ribonucleoprotein protein IMP4-like [Megachile rotundata]	U3 small nucleolar ribonucleoprotein protein IMP4 OS=Rattus norvegicus GN=Imp4 PE=2 SV=1	U3 small nucleolar ribonucleoprotein protein IMP4 OS=Camponotus floridanus GN=EAG_02904 PE=4 SV=1	COG2136|Predicted exosome subunit/U3 small nucleolar ribonucleoprotein (snoRNP) component, contains IMP4 domain|JA|Translation, ribosomal structure and biogenesis ; RNA processing and modification ;	NA	IPR004154; Anticodon-binding IPR007109; Brix domain	K14561 IMP4; U3 small nucleolar ribonucleoprotein protein IMP4 K14561 Genetic Information Processing; Translation; Ribosome biogenesis in eukaryotes [PATH:ko03008]
LOCMI00506	0.190242	0	0	0.349583	0.113575	0	LOCMI00506	LOCMI00506	LOCMI00506	LOCMI00506	LOCMI00506	LOCMI00506	LOCMI00506	LOCMI00506	LOCMI00506
LOCMI00507	12.9365	13.9809	11.2627	11.5362	9.19958	15.8487	CTP synthase 2	CTPS2	CTP synthase [Zootermopsis nevadensis]	CTP synthase 2 OS=Bos taurus GN=CTPS2 PE=2 SV=1	CTP synthase OS=Ixodes ricinus PE=2 SV=1	COG0504|CTP synthase (UTP-ammonia lyase)|F|Nucleotide transport and metabolism ;	GO:0003883; CTP synthase activity; Molecular Function GO:0006221; pyrimidine nucleotide biosynthetic process; Biological Process	IPR004468; CTP synthase IPR017456; CTP synthase, N-terminal IPR027417; P-loop containing nucleoside triphosphate hydrolase	K01937 E6.3.4.2, pyrG; CTP synthase [EC:6.3.4.2] [EC:6.3.4.2] Metabolism; Nucleotide metabolism; Pyrimidine metabolism [PATH:ko00240]
LOCMI00508	7.60969	10.2226	10.0113	8.38999	5.9059	11.1369	Macoilin	TMEM57	Macoilin [Cerapachys biroi]	Macoilin OS=Sus scrofa GN=TMEM57 PE=2 SV=1	Putative uncharacterized protein OS=Tribolium castaneum GN=TcasGA2_TC005588 PE=4 SV=1	NA	GO:0016021; integral component of membrane; Cellular Component	IPR019130; Macoilin	NA
LOCMI00509	0	0	0	0	0	0	Putative polypeptide N-acetylgalactosaminyltransferase 9	pgant9	Putative polypeptide N-acetylgalactosaminyltransferase 9 [Acromyrmex echinatior]	Putative polypeptide N-acetylgalactosaminyltransferase 9 OS=Drosophila melanogaster GN=pgant9 PE=2 SV=2	Putative polypeptide N-acetylgalactosaminyltransferase 9 OS=Acromyrmex echinatior GN=G5I_11730 PE=3 SV=1	NA	NA	IPR000772; Ricin B lectin domain	NA
LOCMI00510	0	0	0.250283	0	0	0.214172	N-glycosylase/DNA lyase	Ogg1	hypothetical protein BRAFLDRAFT_86839 [Branchiostoma floridae] gb|EEN65261.1| hypothetical protein BRAFLDRAFT_86839 [Branchiostoma floridae]	N-glycosylase/DNA lyase OS=Mus musculus GN=Ogg1 PE=2 SV=2	Putative uncharacterized protein OS=Branchiostoma floridae GN=BRAFLDRAFT_86839 PE=4 SV=1	COG0122|3-methyladenine DNA glycosylase/8-oxoguanine DNA glycosylase|L|Replication, recombination and repair ;	GO:0003824; catalytic activity; Molecular Function GO:0006281; DNA repair; Biological Process GO:0006284; base-excision repair; Biological Process	IPR003265; HhH-GPD domain IPR011257; DNA glycosylase IPR023170; Helix-turn-helix, base-excision DNA repair, C-terminal	K03660 OGG1; N-glycosylase/DNA lyase [EC:3.2.2.- 4.2.99.18] [EC:3.2.2.- 4.2.99.18] Genetic Information Processing; Replication and repair; DNA replication proteins [BR:ko03032] Genetic Information Processing; Replication and repair; Chromosome and associated proteins [BR:ko03036] Genetic Information Processing; Replication and repair; Base excision repair [PATH:ko03410]
LOCMI00511	0	0	0	0.349583	0	0	Mediator of RNA polymerase II transcription subunit 6	MED6	PREDICTED: mediator of RNA polymerase II transcription subunit 6-like isoform X2 [Aplysia californica]	Mediator of RNA polymerase II transcription subunit 6 OS=Anopheles gambiae GN=MED6 PE=3 SV=3	Putative uncharacterized protein OS=Culex quinquefasciatus GN=CpipJ_CPIJ006056 PE=4 SV=1	COG5097|RNA polymerase II transcriptional regulation mediator|K|Transcription ;	GO:0001104; RNA polymerase II transcription cofactor activity; Molecular Function GO:0006357; regulation of transcription from RNA polymerase II promoter; Biological Process GO:0016592; mediator complex; Cellular Component	IPR007018; Mediator complex, subunit Med6	NA
LOCMI00512	0	0	0	0	0	0	LOCMI00512	LOCMI00512	LOCMI00512	LOCMI00512	LOCMI00512	LOCMI00512	LOCMI00512	LOCMI00512	LOCMI00512
LOCMI00513	75.9067	111.246	106.746	127.714	109.032	85.6688	Transcription cofactor vestigial-like protein 4	VGLL4	PREDICTED: uncharacterized protein LOC657295 isoform X2 [Tribolium castaneum] ref|XP_008199634.1| PREDICTED: uncharacterized protein LOC657295 isoform X2 [Tribolium castaneum]	Transcription cofactor vestigial-like protein 4 OS=Homo sapiens GN=VGLL4 PE=1 SV=4	Transcription cofactor vestigial-like protein OS=Anoplophora glabripennis GN=VGLL4 PE=4 SV=1	NA	GO:0006355; regulation of transcription, DNA-templated; Biological Process	IPR006627; TDU repeat IPR028184; Transcription cofactor vestigial-like protein 4	NA
LOCMI00515	4.47069	3.00665	1.75198	5.24374	4.31585	3.64093	NA	LOCMI00515	hypothetical protein L798_04814 [Zootermopsis nevadensis]	NA	NA	NA	NA	NA	NA
LOCMI00516	12.0804	10.5233	8.75991	10.2544	3.97513	3.74801	Desumoylating isopeptidase 1	DESI1	PPPDE peptidase domain-containing protein 2 [Zootermopsis nevadensis]	Desumoylating isopeptidase 1 OS=Homo sapiens GN=DESI1 PE=1 SV=1	PPPDE peptidase domain-containing protein 2 OS=Acromyrmex echinatior GN=G5I_10628 PE=4 SV=1	NA	NA	IPR008580; PPPDE putative peptidase domain	NA
LOCMI00517	0	0	1.12627	1.63139	0.567875	0	DnaJ homolog subfamily A member 2	Dnaja2	predicted protein [Bathycoccus prasinos] emb|CCO14085.1| predicted protein [Bathycoccus prasinos]	DnaJ homolog subfamily A member 2 OS=Rattus norvegicus GN=Dnaja2 PE=2 SV=1	Uncharacterized protein OS=Bathycoccus prasinos GN=Bathy01g06460 PE=3 SV=1	COG0484|DnaJ-class molecular chaperone with C-terminal Zn finger domain|O|Posttranslational modification, protein turnover, chaperones ;	GO:0006457; protein folding; Biological Process GO:0051082; unfolded protein binding; Molecular Function	IPR002939; Chaperone DnaJ, C-terminal IPR008971; HSP40/DnaJ peptide-binding	NA
LOCMI00518	2.47315	1.50333	1.25142	3.96194	0	1.71338	LOCMI00518	LOCMI00518	LOCMI00518	LOCMI00518	LOCMI00518	LOCMI00518	LOCMI00518	LOCMI00518	LOCMI00518
LOCMI00519	15.2194	6.9153	16.6438	16.1973	14.424	13.5999	Sorting nexin-2	SNX2	Sorting nexin-2 [Zootermopsis nevadensis]	Sorting nexin-2 OS=Bos taurus GN=SNX2 PE=2 SV=1	Putative uncharacterized protein OS=Tribolium castaneum GN=TcasGA2_TC008785 PE=4 SV=1	COG5391|Phox homology (PX) domain protein|UR|Intracellular trafficking, secretion, and vesicular transport ; General function prediction only ;	GO:0005515; protein binding; Molecular Function GO:0007154; cell communication; Biological Process GO:0035091; phosphatidylinositol binding; Molecular Function	IPR001683; Phox homologous domain	K17917
LOCMI00520	8.94139	10.0723	8.1342	6.05944	7.83668	8.03145	LOCMI00520	LOCMI00520	LOCMI00520	LOCMI00520	LOCMI00520	LOCMI00520	LOCMI00520	LOCMI00520	LOCMI00520
LOCMI00521	9.41699	6.31397	8.38449	7.34124	8.06383	9.74483	Cytoplasmic tRNA 2-thiolation protein 2-A	ctu2-a	Cytoplasmic tRNA 2-thiolation protein 2 A [Zootermopsis nevadensis]	Cytoplasmic tRNA 2-thiolation protein 2-A OS=Xenopus laevis GN=ctu2-a PE=2 SV=1	Cytoplasmic tRNA 2-thiolation protein 2 OS=Lottia gigantea GN=LOTGIDRAFT_237923 PE=3 SV=1	NA	NA	IPR011063; tRNA(Ile)-lysidine/2-thiocytidine synthase IPR014729; Rossmann-like alpha/beta/alpha sandwich fold IPR019407; Thiouridylase, cytoplasmic, subunit 2	K14169 CTU2, NCS2; cytoplasmic tRNA 2-thiolation protein 2 K14169 Genetic Information Processing; Folding, sorting and degradation; Ubiquitin system [BR:ko04121] Genetic Information Processing; Folding, sorting and degradation; Sulfur relay system [PATH:ko04122]
LOCMI00522	0.380485	0.300665	1.37656	0.699166	1.02218	0.642516	Zinc finger protein 182	ZNF182	PREDICTED: zinc finger protein 729-like, partial [Trichechus manatus latirostris]	Zinc finger protein 182 OS=Homo sapiens GN=ZNF182 PE=1 SV=2	Uncharacterized protein (Fragment) OS=Taeniopygia guttata GN=ZNF493-3 PE=4 SV=1	COG5048|FOG: Zn-finger|R|General function prediction only ;	GO:0003676; nucleic acid binding; Molecular Function GO:0046872; metal ion binding; Molecular Function	IPR007087; Zinc finger, C2H2 IPR013087; Zinc finger C2H2-type/integrase DNA-binding domain IPR015880; Zinc finger, C2H2-like	NA
LOCMI00523	668.702	871.779	833.693	759.993	855.447	645.301	Nucleoside diphosphate kinase	awd	putative nucleoside diphosphate kinase [Coptotermes formosanus]	Nucleoside diphosphate kinase OS=Drosophila melanogaster GN=awd PE=1 SV=3	Nucleoside diphosphate kinase OS=Coptotermes formosanus PE=2 SV=1	COG0105|Nucleoside diphosphate kinase|F|Nucleotide transport and metabolism ;	GO:0004550; nucleoside diphosphate kinase activity; Molecular Function GO:0005524; ATP binding; Molecular Function GO:0006165; nucleoside diphosphate phosphorylation; Biological Process GO:0006183; GTP biosynthetic process; Biological Process GO:0006228; UTP biosynthetic process; Biological Process GO:0006241; CTP biosynthetic process; Biological Process	IPR001564; Nucleoside diphosphate kinase IPR023005; Nucleoside diphosphate kinase, active site	K00940 E2.7.4.6, ndk; nucleoside-diphosphate kinase [EC:2.7.4.6] [EC:2.7.4.6] Metabolism; Nucleotide metabolism; Purine metabolism [PATH:ko00230] Metabolism; Nucleotide metabolism; Pyrimidine metabolism [PATH:ko00240]
LOCMI00524	1.90242	0.751664	0.625708	1.16528	0.567875	1.07086	LOCMI00524	LOCMI00524	LOCMI00524	LOCMI00524	LOCMI00524	LOCMI00524	LOCMI00524	LOCMI00524	LOCMI00524
LOCMI00525	6.37312	5.86298	13.265	8.15694	9.65388	6.53225	DNA-directed RNA polymerase III subunit RPC10	Polr3k	PREDICTED: DNA-directed RNA polymerase III subunit RPC10 [Stegastes partitus]	DNA-directed RNA polymerase III subunit RPC10 OS=Mus musculus GN=Polr3k PE=2 SV=1	DNA-directed RNA polymerase subunit OS=Xiphophorus maculatus PE=3 SV=1	COG1594|DNA-directed RNA polymerase, subunit M/Transcription elongation factor TFIIS|K|Transcription ;	GO:0003676; nucleic acid binding; Molecular Function GO:0003677; DNA binding; Molecular Function GO:0003899; DNA-directed RNA polymerase activity; Molecular Function GO:0006351; transcription, DNA-templated; Biological Process GO:0008270; zinc ion binding; Molecular Function	IPR001222; Zinc finger, TFIIS-type IPR001529; DNA-directed RNA polymerase, M/15kDa subunit IPR012164; DNA-directed RNA polymerase, subunit C11/M/9 IPR019761; DNA-directed RNA polymerase M, 15kDa subunit, conserved site	K03019 RPC11, POLR3K; DNA-directed RNA polymerase III subunit RPC10 K03019 Metabolism; Nucleotide metabolism; Purine metabolism [PATH:ko00230] Metabolism; Nucleotide metabolism; Pyrimidine metabolism [PATH:ko00240] Genetic Information Processing; Transcription; RNA polymerase [PATH:ko03020] Organismal Systems; Immune system; Cytosolic DNA-sensing pathway [PATH:ko04623] Human Diseases; Infectious …
LOCMI00526	31.9607	30.9685	22.2752	12.3519	15.5598	17.6692	Ryanodine receptor 44F	Rya-r44F	PREDICTED: ryanodine receptor 44F [Acyrthosiphon pisum]	Ryanodine receptor 44F OS=Drosophila melanogaster GN=Rya-r44F PE=1 SV=3	Ryanodine receptor OS=Nilaparvata lugens PE=2 SV=1	NA	NA	IPR003032; Ryanodine receptor Ryr	NA
LOCMI00527	2.94876	1.20266	1.37656	2.68014	1.8172	1.39212	Tectonin beta-propeller repeat-containing protein 2	TECPR2	hypothetical protein BRAFLDRAFT_216841 [Branchiostoma floridae] gb|EEN66171.1| hypothetical protein BRAFLDRAFT_216841 [Branchiostoma floridae]	Tectonin beta-propeller repeat-containing protein 2 OS=Homo sapiens GN=TECPR2 PE=1 SV=4	Putative uncharacterized protein (Fragment) OS=Branchiostoma floridae GN=BRAFLDRAFT_216841 PE=4 SV=1	NA	NA	NA	NA
LOCMI00529	0.190242	0	0.500566	0.233055	0.22715	0	Eukaryotic translation initiation factor 4E type 2	EIF4E2	Eukaryotic initiation factor 4E [Acanthamoeba castellanii str. Neff] gb|ELR18705.1| Eukaryotic initiation factor 4E [Acanthamoeba castellanii str. Neff]	Eukaryotic translation initiation factor 4E type 2 OS=Homo sapiens GN=EIF4E2 PE=1 SV=1	Eukaryotic initiation factor 4E OS=Acanthamoeba castellanii str. Neff GN=ACA1_395220 PE=3 SV=1	COG5053|Translation initiation factor 4E (eIF-4E)|J|Translation, ribosomal structure and biogenesis ;	GO:0003723; RNA binding; Molecular Function GO:0003743; translation initiation factor activity; Molecular Function GO:0005737; cytoplasm; Cellular Component GO:0006413; translational initiation; Biological Process	IPR001040; Translation Initiation factor eIF- 4e IPR023398; Translation Initiation factor eIF- 4e-like domain	NA
LOCMI00530	0	0	0	1.04875	1.02218	0.642516	Myrosinase 1	LOCMI00530	NA	NA	Myrosinase 1 OS=Anoplophora glabripennis GN=MYRO1 PE=3 SV=1	NA	GO:0005975; carbohydrate metabolic process; Biological Process	IPR013781; Glycoside hydrolase, catalytic domain	NA
LOCMI00531	0	0	0	0	0.340725	0	Heterogeneous nuclear ribonucleoprotein A2	HNRNPA2B1	Heterogeneous nuclear ribonucleoprotein A2 [Echinococcus granulosus]	NA	Heterogeneous nuclear ribonucleoprotein A2 OS=Echinococcus granulosus GN=EgrG_000762600 PE=4 SV=1	NA	GO:0000166; nucleotide binding; Molecular Function GO:0003676; nucleic acid binding; Molecular Function	IPR000504; RNA recognition motif domain IPR012677; Nucleotide-binding, alpha-beta plait	NA
LOCMI00532	0.285363	0	0.125142	0.466111	0.340725	0.214172	Flap endonuclease GEN	Gen	PREDICTED: flap endonuclease GEN isoform X2 [Tribolium castaneum]	Flap endonuclease GEN OS=Drosophila pseudoobscura pseudoobscura GN=Gen PE=3 SV=1	Putative uncharacterized protein OS=Tribolium castaneum GN=TcasGA2_TC006044 PE=4 SV=1	NA	NA	NA	NA
LOCMI00533	4.47069	5.86298	3.37882	5.82638	5.79233	8.13854	Dynactin subunit 4	DCTN4	Dynactin subunit 4 [Zootermopsis nevadensis]	Dynactin subunit 4 OS=Homo sapiens GN=DCTN4 PE=1 SV=1	Dynactin subunit 4 OS=Harpegnathos saltator GN=EAI_12549 PE=4 SV=1	NA	GO:0005869; dynactin complex; Cellular Component	IPR008603; Dynactin p62	K10426 DCTN4; dynactin 4 K10426 Organismal Systems; Excretory system; Vasopressin-regulated water reabsorption [PATH:ko04962] Human Diseases; Neurodegenerative diseases; Huntington's disease [PATH:ko05016]
LOCMI00535	33.4826	35.1779	40.0453	25.8691	35.7761	46.047	28S ribosomal protein S22, mitochondrial	MRPS22	PREDICTED: 28S ribosomal protein S22, mitochondrial-like [Apis dorsata]	28S ribosomal protein S22, mitochondrial OS=Bos taurus GN=MRPS22 PE=1 SV=2	Uncharacterized protein OS=Apis mellifera GN=mRpS22 PE=4 SV=1	NA	NA	IPR019374; Ribosomal protein S22, mitochondrial	K17401
LOCMI00539	0	0	0	0	0	0	YEATS domain-containing protein 4	YEATS4	PREDICTED: YEATS domain-containing protein 4-like [Xiphophorus maculatus]	YEATS domain-containing protein 4 OS=Homo sapiens GN=YEATS4 PE=1 SV=1	Uncharacterized protein OS=Saprolegnia diclina VS20 GN=SDRG_16997 PE=4 SV=1	COG5033|Transcription initiation factor IIF, auxiliary subunit|K|Transcription ;	GO:0005634; nucleus; Cellular Component GO:0006355; regulation of transcription, DNA-templated; Biological Process	IPR005033; YEATS	NA
LOCMI00540	3.04388	3.90865	4.25481	3.26277	5.22445	5.67556	Zinc finger, MYND-type	LOCMI00540	hypothetical protein L798_13353 [Zootermopsis nevadensis]	NA	Uncharacterized protein OS=Acyrthosiphon pisum PE=4 SV=1	NA	NA	IPR002893; Zinc finger, MYND-type	NA
LOCMI00541	1.61706	2.10466	0.500566	1.2818	2.38508	1.07086	LOCMI00541	LOCMI00541	LOCMI00541	LOCMI00541	LOCMI00541	LOCMI00541	LOCMI00541	LOCMI00541	LOCMI00541
LOCMI00542	10.2731	8.56896	6.88279	6.40902	8.40456	8.35271	Calcium uniporter protein, mitochondrial	Mcu	hypothetical protein L798_15805, partial [Zootermopsis nevadensis]	Calcium uniporter protein, mitochondrial OS=Mus musculus GN=Mcu PE=1 SV=2	AGAP006330-PA OS=Anopheles gambiae GN=AGAP006330 PE=4 SV=3	NA	NA	IPR006769; Coiled-coil domain containing protein 109, C-terminal	NA
LOCMI00545	12.8414	8.56896	18.521	22.7229	16.1277	12.7432	Chromobox protein homolog 6	CBX6	Chromobox protein-like protein 6 [Zootermopsis nevadensis]	Chromobox protein homolog 6 OS=Homo sapiens GN=CBX6 PE=1 SV=1	Uncharacterized protein (Fragment) OS=Rhodnius prolixus PE=4 SV=1	NA	NA	IPR000953; Chromo domain/shadow IPR016197; Chromo domain-like IPR017984; Chromo domain subgroup IPR023779; Chromo domain, conserved site IPR023780; Chromo domain	K11455
LOCMI00547	0	0	0	0	0	0	LOCMI00547	LOCMI00547	LOCMI00547	LOCMI00547	LOCMI00547	LOCMI00547	LOCMI00547	LOCMI00547	LOCMI00547
LOCMI00548	0.285363	0.150333	0.250283	0.349583	0.795025	0.321258	LOCMI00548	LOCMI00548	LOCMI00548	LOCMI00548	LOCMI00548	LOCMI00548	LOCMI00548	LOCMI00548	LOCMI00548
LOCMI00549	0.760969	0	0.500566	0.466111	0.4543	0.428344	LOCMI00549	LOCMI00549	LOCMI00549	LOCMI00549	LOCMI00549	LOCMI00549	LOCMI00549	LOCMI00549	LOCMI00549
LOCMI00550	0.570727	0	0.75085	0	0	0.856688	Polypeptide N-acetylgalactosaminyltransferase 5	pgant5	Polypeptide N-acetylgalactosaminyltransferase 5 [Zootermopsis nevadensis]	Polypeptide N-acetylgalactosaminyltransferase 5 OS=Drosophila melanogaster GN=pgant5 PE=2 SV=2	Uncharacterized protein OS=Nasonia vitripennis PE=3 SV=1	NA	NA	NA	NA
LOCMI00552	0	0	1.25142	0	0	0	Ubiquitin-fold modifier-conjugating enzyme 1	AAEL005968	ubiquitin-specific protease 21 isoform a-like protein [Camelus ferus]	Ubiquitin-fold modifier-conjugating enzyme 1 OS=Aedes aegypti GN=AAEL005968 PE=3 SV=1	Ubiquitin-specific protease 21 isoform a-like protein OS=Camelus ferus GN=CB1_000141021 PE=4 SV=1	NA	NA	IPR014806; Ubiquitin-fold modifier-conjugating enzyme 1 IPR016135; Ubiquitin-conjugating enzyme/RWD-like	NA
LOCMI00553	0	0	0	0.233055	0	0	Vacuolar protein sorting-associated protein 28 homolog 2	VPS28-2	vacuolar protein sorting protein 28 [Breviata anathema]	Vacuolar protein sorting-associated protein 28 homolog 2 OS=Arabidopsis thaliana GN=VPS28-2 PE=1 SV=2	Vacuolar protein sorting protein 28 OS=Breviata anathema GN=VPS28 PE=2 SV=1	NA	NA	IPR007143; Vacuolar protein sorting-associated, VPS28 IPR017898; Vacuolar protein sorting-associated, VPS28, N-terminal IPR017899; Vacuolar protein sorting-associated, VPS28, C-terminal	NA
LOCMI00554	0	0	5.38109	0.349583	0	0	Eukaryotic translation initiation factor 5A	eIF-5A	eukaryotic translation initiation factor 5A-like protein [Chaetomium thermophilum var. thermophilum DSM 1495] gb|EGS21139.1| eukaryotic translation initiation factor 5A-like protein [Chaetomium thermophilum var. thermophilum DSM 1495]	Eukaryotic translation initiation factor 5A OS=Drosophila melanogaster GN=eIF-5A PE=2 SV=2	Eukaryotic translation initiation factor 5A-like protein OS=Chaetomium thermophilum (strain DSM 1495 / CBS 144.50 / IMI 039719) GN=CTHT_0029800 PE=4 SV=1	COG0231|Translation elongation factor P (EF-P)/translation initiation factor 5A (eIF-5A)|J|Translation, ribosomal structure and biogenesis ;	GO:0003723; RNA binding; Molecular Function GO:0003746; translation elongation factor activity; Molecular Function GO:0006452; translational frameshifting; Biological Process GO:0008612; peptidyl-lysine modification to peptidyl-hypusine; Biological Process GO:0043022; ribosome binding; Molecular Function GO:0045901; positive regulation of translational elongation; Biological Process GO:0045905; p…	IPR001884; Translation elongation factor IF5A IPR008991; Translation protein SH3-like domain IPR012340; Nucleic acid-binding, OB-fold IPR014722; Ribosomal protein L2 domain 2 IPR019769; Translation elongation factor, IF5A, hypusine site IPR020189; Translation elongation factor, IF5A C-terminal	NA
LOCMI00555	0.0951212	0	0	0.233055	0	0.214172	LOCMI00555	LOCMI00555	LOCMI00555	LOCMI00555	LOCMI00555	LOCMI00555	LOCMI00555	LOCMI00555	LOCMI00555
LOCMI00556	1.23658	2.10466	1.00113	5.01069	1.8172	7.06768	Multidrug resistance-associated protein 4	ABCC4	Multidrug resistance-associated protein 1 [Zootermopsis nevadensis]	Multidrug resistance-associated protein 4 OS=Homo sapiens GN=ABCC4 PE=1 SV=3	Uncharacterized protein OS=Dendroctonus ponderosae GN=D910_11699 PE=4 SV=1	COG1132|ABC-type multidrug transport system, ATPase and permease components|V|Defense mechanisms ;	NA	IPR027417; P-loop containing nucleoside triphosphate hydrolase	NA
LOCMI00558	0	0	0	0	0	0	LOCMI00558	LOCMI00558	LOCMI00558	LOCMI00558	LOCMI00558	LOCMI00558	LOCMI00558	LOCMI00558	LOCMI00558
LOCMI00560	1.04633	2.10466	0	1.2818	0.567875	0.856688	LOCMI00560	LOCMI00560	LOCMI00560	LOCMI00560	LOCMI00560	LOCMI00560	LOCMI00560	LOCMI00560	LOCMI00560
LOCMI00561	0	0	0	0	0	0	NA	LOCMI00561	hypothetical protein L798_11248 [Zootermopsis nevadensis]	NA	Uncharacterized protein OS=Rhodnius prolixus PE=4 SV=1	NA	NA	NA	K03323
LOCMI00562	0	0	4.88052	3.3793	0.340725	0	60S ribosomal protein L35a-3	RPL35AC	60s ribosomal protein L33-A, putative [Eimeria maxima]	60S ribosomal protein L35a-3 OS=Arabidopsis thaliana GN=RPL35AC PE=3 SV=1	60s ribosomal protein L33-A, putative OS=Eimeria maxima GN=EMWEY_00007150 PE=4 SV=1	COG2451|Ribosomal protein L35AE/L33A|J|Translation, ribosomal structure and biogenesis ;	GO:0003735; structural constituent of ribosome; Molecular Function GO:0005622; intracellular; Cellular Component GO:0005840; ribosome; Cellular Component GO:0006412; translation; Biological Process	IPR001780; Ribosomal protein L35A IPR009000; Translation protein, beta-barrel domain	K02917 RP-L35Ae, RPL35A; large subunit ribosomal protein L35Ae K02917 Genetic Information Processing; Translation; Ribosome [PATH:ko03010]
LOCMI00563	0.285363	0.450998	0.75085	0.699166	0	1.07086	LOCMI00563	LOCMI00563	LOCMI00563	LOCMI00563	LOCMI00563	LOCMI00563	LOCMI00563	LOCMI00563	LOCMI00563
LOCMI00564	0	0	0.75085	0	0	0	P-loop containing nucleoside triphosphate hydrolase	LOCMI00564	NA	NA	NA	NA	NA	IPR027417; P-loop containing nucleoside triphosphate hydrolase	NA
LOCMI00565	14.2682	13.5299	12.1387	11.3032	12.3797	13.5999	LOCMI00565	LOCMI00565	LOCMI00565	LOCMI00565	LOCMI00565	LOCMI00565	LOCMI00565	LOCMI00565	LOCMI00565
LOCMI00566	1.42682	0.300665	1.62684	1.74791	1.02218	1.39212	WD repeat-containing protein 20	WDR20	WD repeat-containing protein 20 [Zootermopsis nevadensis]	WD repeat-containing protein 20 OS=Homo sapiens GN=WDR20 PE=1 SV=2	WD-repeat protein, putative OS=Pediculus humanus subsp. corporis GN=Phum_PHUM003350 PE=4 SV=1	COG2319|FOG: WD40 repeat|R|General function prediction only ;	GO:0005515; protein binding; Molecular Function	IPR001680; WD40 repeat IPR015943; WD40/YVTN repeat-like-containing domain IPR017986; WD40-repeat-containing domain	NA
LOCMI00567	0.285363	0	0	0.116528	0	0	LOCMI00567	LOCMI00567	LOCMI00567	LOCMI00567	LOCMI00567	LOCMI00567	LOCMI00567	LOCMI00567	LOCMI00567
LOCMI00569	27.7754	27.2102	25.4037	27.2675	28.6209	26.0219	Zinc finger RNA-binding protein	zfr	Zinc finger RNA-binding protein, partial [Zootermopsis nevadensis]	Zinc finger RNA-binding protein OS=Xenopus laevis GN=zfr PE=2 SV=1	Zinc finger RNA-binding protein OS=Camponotus floridanus GN=EAG_12949 PE=4 SV=1	NA	GO:0003676; nucleic acid binding; Molecular Function GO:0008270; zinc ion binding; Molecular Function	IPR003604; Zinc finger, U1-type	K13203
LOCMI00570	0	0	0	0.582638	0	0	LOCMI00570	LOCMI00570	LOCMI00570	LOCMI00570	LOCMI00570	LOCMI00570	LOCMI00570	LOCMI00570	LOCMI00570
LOCMI00571	2.56827	0.601331	4.37996	3.61236	3.52083	2.89132	LOCMI00571	LOCMI00571	LOCMI00571	LOCMI00571	LOCMI00571	LOCMI00571	LOCMI00571	LOCMI00571	LOCMI00571
LOCMI00572	0	0	0	0	1.47648	0.321258	Parkin coregulated gene protein homolog	Pacrg	hypothetical protein SINV_15808 [Solenopsis invicta]	Parkin coregulated gene protein homolog OS=Mus musculus GN=Pacrg PE=1 SV=1	Putative uncharacterized protein (Fragment) OS=Solenopsis invicta GN=SINV_15808 PE=4 SV=1	NA	NA	IPR019399; Parkin co-regulated protein	NA
LOCMI00573	0	0	0.500566	0.932221	0	0	Proteasome subunit beta type-4	psmB4-1	proteasome subunit beta type4, putative [Acanthamoeba castellanii str. Neff] gb|ELR22135.1| proteasome subunit beta type4, putative [Acanthamoeba castellanii str. Neff]	Proteasome subunit beta type-4 OS=Dictyostelium discoideum GN=psmB4-1 PE=3 SV=1	Proteasome subunit beta type4, putative OS=Acanthamoeba castellanii str. Neff GN=ACA1_159830 PE=4 SV=1	COG0638|20S proteasome, alpha and beta subunits|O|Posttranslational modification, protein turnover, chaperones ;	GO:0004298; threonine-type endopeptidase activity; Molecular Function GO:0005839; proteasome core complex; Cellular Component GO:0051603; proteolysis involved in cellular protein catabolic process; Biological Process	IPR001353; Proteasome, subunit alpha/beta	K02736 PSMB4; 20S proteasome subunit beta 7 [EC:3.4.25.1] [EC:3.4.25.1] Genetic Information Processing; Folding, sorting and degradation; Proteasome [PATH:ko03050]
LOCMI00574	0	0	0.375425	0.116528	0	0	Repressor of RNA polymerase III transcription MAF1 homolog	MAF1	repressor of rna polymerase iii transcription, putative [Acanthamoeba castellanii str. Neff] gb|ELR24045.1| repressor of rna polymerase iii transcription, putative [Acanthamoeba castellanii str. Neff]	Repressor of RNA polymerase III transcription MAF1 homolog OS=Homo sapiens GN=MAF1 PE=1 SV=2	Repressor of rna polymerase iii transcription, putative OS=Acanthamoeba castellanii str. Neff GN=ACA1_144360 PE=4 SV=1	COG5046|Protein involved in Mod5 protein sorting|O|Posttranslational modification, protein turnover, chaperones ;	GO:0016480; negative regulation of transcription from RNA polymerase III promoter; Biological Process	IPR015257; Repressor of RNA polymerase III transcription Maf1	NA
LOCMI00575	0.380485	1.05233	0	0	0	1.92755	LOCMI00575	LOCMI00575	LOCMI00575	LOCMI00575	LOCMI00575	LOCMI00575	LOCMI00575	LOCMI00575	LOCMI00575
LOCMI00576	0.190242	0	0	0.466111	0.340725	0.321258	Neprilysin-2	nep-2	hypothetical protein SINV_13863 [Solenopsis invicta]	Neprilysin-2 OS=Caenorhabditis elegans GN=nep-2 PE=1 SV=2	Putative uncharacterized protein (Fragment) OS=Solenopsis invicta GN=SINV_13863 PE=4 SV=1	COG3590|Predicted metalloendopeptidase|O|Posttranslational modification, protein turnover, chaperones ;	GO:0004222; metalloendopeptidase activity; Molecular Function GO:0006508; proteolysis; Biological Process GO:0008237; metallopeptidase activity; Molecular Function	IPR000718; Peptidase M13 IPR008753; Peptidase M13, N-terminal domain IPR018497; Peptidase M13, C-terminal domain IPR024079; Metallopeptidase, catalytic domain	NA
LOCMI00577	0.760969	0.450998	0	0.582638	0	0	Queuine tRNA-ribosyltransferase subunit QTRTD1	QTRTD1	Queuine tRNA-ribosyltransferase subunit QTRTD1 [Zootermopsis nevadensis]	Queuine tRNA-ribosyltransferase subunit QTRTD1 OS=Gallus gallus GN=QTRTD1 PE=2 SV=1	Queuine tRNA-ribosyltransferase subunit QTRTD1 homolog OS=Rhodnius prolixus PE=3 SV=1	NA	GO:0006400; tRNA modification; Biological Process GO:0008479; queuine tRNA-ribosyltransferase activity; Molecular Function GO:0008616; queuosine biosynthetic process; Biological Process	IPR002616; tRNA-guanine(15) transglycosylase-like	NA
LOCMI00578	0.285363	0	2.12741	1.98097	1.13575	1.82046	LOCMI00578	LOCMI00578	LOCMI00578	LOCMI00578	LOCMI00578	LOCMI00578	LOCMI00578	LOCMI00578	LOCMI00578
LOCMI00579	6.84872	10.2226	29.158	13.9833	16.9227	15.5275	LOCMI00579	LOCMI00579	LOCMI00579	LOCMI00579	LOCMI00579	LOCMI00579	LOCMI00579	LOCMI00579	LOCMI00579
LOCMI00580	0	0	0	0	0.340725	0	LOCMI00580	LOCMI00580	LOCMI00580	LOCMI00580	LOCMI00580	LOCMI00580	LOCMI00580	LOCMI00580	LOCMI00580
LOCMI00582	0	0	0	0	8.85886	15.4204	GNBP3	GNBP3	GNBP3 [Locusta migratoria]	NA	GNBP3 OS=Locusta migratoria PE=2 SV=1	NA	NA	NA	NA
LOCMI00583	0	0	0.250283	0.233055	0.22715	0	Glutathione synthetase	gshB	unnamed protein product [Albugo candida]	Glutathione synthetase OS=Dictyostelium discoideum GN=gshB PE=3 SV=1	Glutathione synthase OS=Dictyostelium fasciculatum (strain SH3) GN=gshB PE=4 SV=1	NA	GO:0004363; glutathione synthase activity; Molecular Function GO:0005524; ATP binding; Molecular Function GO:0006750; glutathione biosynthetic process; Biological Process GO:0016874; ligase activity; Molecular Function	IPR004887; Glutathione synthase, substrate-binding, eukaryotic IPR005615; Glutathione synthase, eukaryotic IPR014042; Glutathione synthase, alpha-helical, eukaryotic IPR016185; Pre-ATP-grasp domain	NA
LOCMI00585	0	0	15.7678	6.99166	10.7896	9.74483	Mitochondrial import inner membrane translocase subunit Tim8	Tim8	Mitochondrial import inner membrane translocase subunit Tim8 [Zootermopsis nevadensis]	Mitochondrial import inner membrane translocase subunit Tim8 OS=Drosophila melanogaster GN=Tim8 PE=3 SV=1	Uncharacterized protein OS=Dendroctonus ponderosae GN=D910_11793 PE=4 SV=1	NA	NA	IPR004217; Tim10/DDP family zinc finger	K17780
LOCMI00586	64.7775	108.691	68.953	40.0855	52.5853	46.2612	Mitochondrial import inner membrane translocase subunit Tim8	Tim8	Mitochondrial import inner membrane translocase subunit Tim8 [Zootermopsis nevadensis]	Mitochondrial import inner membrane translocase subunit Tim8 OS=Drosophila melanogaster GN=Tim8 PE=3 SV=1	Uncharacterized protein OS=Dendroctonus ponderosae GN=D910_11793 PE=4 SV=1	NA	NA	IPR004217; Tim10/DDP family zinc finger	K17780
LOCMI00587	1.8073	1.65366	2.37769	4.42805	1.24933	3.21258	Probable multidrug resistance-associated protein lethal(2)03659	ABCC2	Multidrug resistance-associated protein 1 [Zootermopsis nevadensis]	Probable multidrug resistance-associated protein lethal(2)03659 OS=Drosophila melanogaster GN=l(2)03659 PE=2 SV=3	Putative uncharacterized protein OS=Tribolium castaneum GN=TcasGA2_TC014776 PE=3 SV=1	NA	GO:0005524; ATP binding; Molecular Function GO:0006810; transport; Biological Process GO:0016021; integral component of membrane; Cellular Component GO:0042626; ATPase activity, coupled to transmembrane movement of substances; Molecular Function GO:0055085; transmembrane transport; Biological Process	IPR001140; ABC transporter, transmembrane domain IPR011527; ABC transporter type 1, transmembrane domain	NA
LOCMI00588	0.570727	0	0	0.233055	0	0	Serine/threonine-protein phosphatase 6 regulatory ankyrin repeat subunit A	Ankrd28	Chain D, Tubulin:stathmin-Like Domain Complex pdb|4HNA|D Chain D, Kinesin Motor Domain In The Adp-mg-alfx State In Complex With Tubulin And A Darpin	Serine/threonine-protein phosphatase 6 regulatory ankyrin repeat subunit A OS=Mus musculus GN=Ankrd28 PE=1 SV=1	Uncharacterized protein OS=Amoebophilus asiaticus (strain 5a2) GN=Aasi_0703 PE=4 SV=1	COG0666|FOG: Ankyrin repeat|R|General function prediction only ;	GO:0005515; protein binding; Molecular Function	IPR002110; Ankyrin repeat IPR020683; Ankyrin repeat-containing domain	NA
LOCMI00589	0	0	0	0	0	0.642516	Nucleotide-binding, alpha-beta plait	LOCMI00589	NA	NA	NA	NA	GO:0000166; nucleotide binding; Molecular Function	IPR012677; Nucleotide-binding, alpha-beta plait	NA
LOCMI00590	258.064	297.358	321.113	229.676	278.032	327.79	Ryanodine receptor 44F	Rya-r44F	ryanodine receptor [Leptinotarsa decemlineata]	Ryanodine receptor 44F OS=Drosophila melanogaster GN=Rya-r44F PE=1 SV=3	Ryanodine receptor OS=Helicoverpa armigera GN=RyR PE=2 SV=1	NA	NA	IPR015925; Ryanodine receptor-related	NA
LOCMI00591	0	0	0.75085	0	1.3629	0	LOCMI00591	LOCMI00591	LOCMI00591	LOCMI00591	LOCMI00591	LOCMI00591	LOCMI00591	LOCMI00591	LOCMI00591
LOCMI00596	0	0	0	0.932221	0	0	Putative uncharacterized protein (Fragment)	LOCMI00596	hypothetical protein SINV_00186 [Solenopsis invicta]	NA	Putative uncharacterized protein (Fragment) OS=Solenopsis invicta GN=SINV_00186 PE=4 SV=1	NA	NA	IPR006578; MADF domain	NA
LOCMI00597	9.13163	8.2683	6.88279	7.5743	7.38238	6.21099	Ran GTPase-activating protein 1	rna1	Ran GTPase-activating protein 1 [Zootermopsis nevadensis]	NA	NA	NA	GO:0005098; Ran GTPase activator activity; Molecular Function GO:0007165; signal transduction; Biological Process	IPR009109; Ran-GTPase activating protein 1, C-terminal	NA
LOCMI00598	0	0	0	0.582638	0.567875	0	Trimeric LpxA-like	LOCMI00598	NA	NA	NA	NA	NA	IPR011004; Trimeric LpxA-like	NA
LOCMI00599	0	0	0	0	0	1.28503	LOCMI00599	LOCMI00599	LOCMI00599	LOCMI00599	LOCMI00599	LOCMI00599	LOCMI00599	LOCMI00599	LOCMI00599
LOCMI00600	0.0951212	0	0	0.116528	0	0	Aspartate--tRNA ligase, cytoplasmic	DARS	PREDICTED: aspartate--tRNA ligase, cytoplasmic-like [Metaseiulus occidentalis]	Aspartate--tRNA ligase, cytoplasmic OS=Bos taurus GN=DARS PE=2 SV=1	Aspartyl-tRNA synthetase, cytoplasmic OS=Acromyrmex echinatior GN=G5I_00236 PE=3 SV=1	COG0017|Aspartyl/asparaginyl-tRNA synthetases|J|Translation, ribosomal structure and biogenesis ;	GO:0000166; nucleotide binding; Molecular Function GO:0003676; nucleic acid binding; Molecular Function GO:0004812; aminoacyl-tRNA ligase activity; Molecular Function GO:0004815; aspartate-tRNA ligase activity; Molecular Function GO:0005524; ATP binding; Molecular Function GO:0005737; cytoplasm; Cellular Component GO:0006418; tRNA aminoacylation for protein translation; Biological Process GO:0006…	IPR002312; Aspartyl/Asparaginyl-tRNA synthetase, class IIb IPR004364; Aminoacyl-tRNA synthetase, class II (D/K/N) IPR004365; OB-fold nucleic acid binding domain, AA-tRNA synthetase-type IPR004523; Aspartyl-tRNA synthetases IPR006195; Aminoacyl-tRNA synthetase, class II IPR012340; Nucleic acid-binding, OB-fold IPR018150; Aminoacyl-tRNA synthetase, class II (D/K/N)-like	NA
LOCMI00601	2.47315	1.50333	0.75085	0.932221	0.22715	0.856688	DNA-directed RNA polymerase III subunit RPC1	POLR3A	PREDICTED: DNA-directed RNA polymerase III subunit RPC1-like [Megachile rotundata]	DNA-directed RNA polymerase III subunit RPC1 OS=Gallus gallus GN=POLR3A PE=2 SV=1	DNA-directed RNA polymerase OS=Apis mellifera GN=LOC725552 PE=3 SV=1	COG0086|DNA-directed RNA polymerase, beta' subunit/160 kD subunit|K|Transcription ;	GO:0003677; DNA binding; Molecular Function GO:0003899; DNA-directed RNA polymerase activity; Molecular Function GO:0005634; nucleus; Cellular Component GO:0006351; transcription, DNA-templated; Biological Process GO:0008270; zinc ion binding; Molecular Function GO:0032549; ribonucleoside binding; Molecular Function	IPR007081; RNA polymerase Rpb1, domain 5 IPR007083; RNA polymerase Rpb1, domain 4 IPR015700; DNA-directed RNA polymerase III largest subunit	K03018 RPC1, POLR3A; DNA-directed RNA polymerase III subunit RPC1 [EC:2.7.7.6] [EC:2.7.7.6] Metabolism; Nucleotide metabolism; Purine metabolism [PATH:ko00230] Metabolism; Nucleotide metabolism; Pyrimidine metabolism [PATH:ko00240] Genetic Information Processing; Transcription; RNA polymerase [PATH:ko03020] Organismal Systems; Immune system; Cytosolic DNA-sensing pathway [PATH:ko04623] Human Dise…
LOCMI00603	0	0	1.12627	0	0	0	LOCMI00603	LOCMI00603	LOCMI00603	LOCMI00603	LOCMI00603	LOCMI00603	LOCMI00603	LOCMI00603	LOCMI00603
LOCMI00604	3.99509	3.75832	2.87826	2.79666	7.2688	5.24722	JmjC domain-containing protein 4	JMJD4	JmjC domain-containing protein 4 [Zootermopsis nevadensis]	JmjC domain-containing protein 4 OS=Gallus gallus GN=JMJD4 PE=2 SV=1	Uncharacterized protein OS=Nasonia vitripennis PE=4 SV=1	NA	GO:0005515; protein binding; Molecular Function	IPR003347; JmjC domain	NA
LOCMI00606	1.04633	2.10466	2.87826	1.98097	1.70363	2.99841	LOCMI00606	LOCMI00606	LOCMI00606	LOCMI00606	LOCMI00606	LOCMI00606	LOCMI00606	LOCMI00606	LOCMI00606
LOCMI00607	2.37803	1.65366	2.75312	0.116528	2.49865	3.8551	Sugar transporter SWEET1	slv	RAG1-activating protein 1-like protein [Zootermopsis nevadensis]	Sugar transporter SWEET1 OS=Drosophila melanogaster GN=slv PE=1 SV=1	Uncharacterized protein OS=Bombyx mori PE=4 SV=1	NA	GO:0016021; integral component of membrane; Cellular Component	IPR004316; SWEET sugar transporter IPR018178; Uncharacterised protein family, AAEL006718	K15382
LOCMI00608	0	0	0	3.02972	0.340725	0	LOCMI00608	LOCMI00608	LOCMI00608	LOCMI00608	LOCMI00608	LOCMI00608	LOCMI00608	LOCMI00608	LOCMI00608
LOCMI00609	14.8389	12.1769	7.00793	2.56361	5.4516	6.31808	LOCMI00609	LOCMI00609	LOCMI00609	LOCMI00609	LOCMI00609	LOCMI00609	LOCMI00609	LOCMI00609	LOCMI00609
LOCMI00610	0.475606	3.15699	2.62797	3.02972	2.95295	1.92755	LOCMI00610	LOCMI00610	LOCMI00610	LOCMI00610	LOCMI00610	LOCMI00610	LOCMI00610	LOCMI00610	LOCMI00610
LOCMI00611	43.0899	32.0209	69.7039	60.2448	61.6713	38.4439	Calreticulin	crt	calreticulin [Schistocerca gregaria]	Calreticulin OS=Bombyx mori GN=crt PE=1 SV=1	Calreticulin OS=Schistocerca gregaria PE=2 SV=1	NA	GO:0005509; calcium ion binding; Molecular Function GO:0005515; protein binding; Molecular Function GO:0005783; endoplasmic reticulum; Cellular Component GO:0006457; protein folding; Biological Process GO:0051082; unfolded protein binding; Molecular Function	IPR001580; Calreticulin/calnexin IPR008985; Concanavalin A-like lectin/glucanases superfamily IPR009033; Calreticulin/calnexin, P domain IPR013320; Concanavalin A-like lectin/glucanase, subgroup IPR018124; Calreticulin/calnexin, conserved site	K08057 CALR; calreticulin K08057 Genetic Information Processing; Folding, sorting and degradation; Protein processing in endoplasmic reticulum [PATH:ko04141] Cellular Processes; Transport and catabolism; Exosome [BR:ko04147] Cellular Processes; Transport and catabolism; Phagosome [PATH:ko04145] Organismal Systems; Immune system; Antigen processing and presentation [PATH:ko04612] Human Diseases; I…
LOCMI00612	44.9923	63.1397	60.1931	48.0094	69.6215	46.2612	LOCMI00612	LOCMI00612	LOCMI00612	LOCMI00612	LOCMI00612	LOCMI00612	LOCMI00612	LOCMI00612	LOCMI00612
LOCMI00613	8.75115	5.11131	12.8896	12.0023	3.29368	10.4944	LOCMI00613	LOCMI00613	LOCMI00613	LOCMI00613	LOCMI00613	LOCMI00613	LOCMI00613	LOCMI00613	LOCMI00613
LOCMI00614	4.66094	11.4253	12.6393	0	12.7204	7.28185	THO complex subunit 4	ALYREF	THO complex subunit 4-B [Zootermopsis nevadensis]	THO complex subunit 4 OS=Taeniopygia guttata GN=ALYREF PE=2 SV=1	RNA and export factor-binding protein 2 OS=Coptotermes formosanus PE=2 SV=1	NA	GO:0000166; nucleotide binding; Molecular Function GO:0003676; nucleic acid binding; Molecular Function	IPR000504; RNA recognition motif domain IPR012677; Nucleotide-binding, alpha-beta plait	NA
LOCMI00615	0	0.450998	7.5085	2.91319	0.567875	0.642516	elongation factor 1A	EEF1A1	elongation factor 1A [Arcyria denudata]	Elongation factor 1-alpha OS=Tetrahymena pyriformis PE=2 SV=1	Elongation factor 1-alpha (Fragment) OS=Arcyria denudata GN=EF1A PE=3 SV=1	COG5256|Translation elongation factor EF-1alpha (GTPase)|J|Translation, ribosomal structure and biogenesis ;	GO:0003746; translation elongation factor activity; Molecular Function GO:0003924; GTPase activity; Molecular Function GO:0005525; GTP binding; Molecular Function GO:0005737; cytoplasm; Cellular Component GO:0006414; translational elongation; Biological Process	IPR000795; Elongation factor, GTP-binding domain IPR004160; Translation elongation factor EFTu/EF1A, C-terminal IPR004161; Translation elongation factor EFTu/EF1A, domain 2 IPR004539; Translation elongation factor EF1A, eukaryotic/archaeal IPR009000; Translation protein, beta-barrel domain IPR009001; Translation elongation factor EF1A/initiation factor IF2gamma, C-terminal IPR027417; P-loop conta…	NA
LOCMI00619	0.570727	0	0.75085	2.56361	0	0	LOCMI00619	LOCMI00619	LOCMI00619	LOCMI00619	LOCMI00619	LOCMI00619	LOCMI00619	LOCMI00619	LOCMI00619
LOCMI00620	0	0	0.375425	0	0	0.107086	SWI/SNF complex subunit SMARCC2	Smarcc2	hypothetical protein [Tuber melanosporum Mel28] emb|CAZ80172.1| unnamed protein product [Tuber melanosporum]	SWI/SNF complex subunit SMARCC2 OS=Mus musculus GN=Smarcc2 PE=1 SV=2	Whole genome shotgun sequence assembly, scaffold_122, strain Mel28 OS=Tuber melanosporum (strain Mel28) GN=GSTUM_00002135001 PE=4 SV=1	COG5259|RSC chromatin remodeling complex subunit RSC8|BK|Chromatin structure and dynamics ; Transcription ;	GO:0003677; DNA binding; Molecular Function GO:0003682; chromatin binding; Molecular Function GO:0005515; protein binding; Molecular Function	IPR001005; SANT/Myb domain IPR007526; SWIRM domain IPR009057; Homeodomain-like IPR011991; Winged helix-turn-helix DNA-binding domain IPR017884; SANT domain	K11649
LOCMI00621	0	0	0	0.466111	0	0	Probable MYST-like histone acetyltransferase 1	HAG4	HAM group protein [Dictyostelium discoideum AX4] gb|EDR41077.1| HAM group protein [Dictyostelium discoideum AX4]	Probable MYST-like histone acetyltransferase 1 OS=Arabidopsis thaliana GN=HAG4 PE=2 SV=1	HAM group protein OS=Dictyostelium discoideum GN=DDB_G0279699 PE=4 SV=1	COG5027|Histone acetyltransferase (MYST family)|B|Chromatin structure and dynamics ;	GO:0005634; nucleus; Cellular Component GO:0006355; regulation of transcription, DNA-templated; Biological Process GO:0016747; transferase activity, transferring acyl groups other than amino-acyl groups; Molecular Function	IPR002717; MOZ/SAS-like protein IPR016181; Acyl-CoA N-acyltransferase	NA
LOCMI00624	0	0	0	0	0	0	FOG: CBS domain	LOCMI00624	hypothetical protein LOTGIDRAFT_219173 [Lottia gigantea]	NA	Uncharacterized protein OS=Lottia gigantea GN=LOTGIDRAFT_219173 PE=4 SV=1	COG0517|FOG: CBS domain|R|General function prediction only ;	GO:0030554; adenyl nucleotide binding; Molecular Function	IPR000644; CBS domain	NA
LOCMI00626	1.14145	0.300665	0.250283	2.21403	2.15793	0.749602	LOCMI00626	LOCMI00626	LOCMI00626	LOCMI00626	LOCMI00626	LOCMI00626	LOCMI00626	LOCMI00626	LOCMI00626
LOCMI00629	0	0	0.375425	0	0	0	LOCMI00629	LOCMI00629	LOCMI00629	LOCMI00629	LOCMI00629	LOCMI00629	LOCMI00629	LOCMI00629	LOCMI00629
LOCMI00634	163.894	228.355	180.955	212.663	290.525	260.005	Small integral membrane protein 12-A	smim12-a	hypothetical protein L798_10771 [Zootermopsis nevadensis]	Small integral membrane protein 12-A OS=Xenopus laevis GN=smim12-a PE=3 SV=1	Putative uncharacterized protein OS=Daphnia pulex GN=DAPPUDRAFT_304831 PE=4 SV=1	NA	NA	NA	NA
LOCMI00635	0	0	0	0	0	0	Myotubularin-related protein 5	SBF1	PREDICTED: myotubularin-related protein 13-like [Megachile rotundata]	Myotubularin-related protein 5 OS=Homo sapiens GN=SBF1 PE=1 SV=3	Uncharacterized protein OS=Nasonia vitripennis PE=3 SV=1	NA	NA	IPR005112; dDENN domain	NA
LOCMI00636	1.90242	1.80399	10.637	32.6277	37.3662	57.5052	Protein brambleberry	bmb	hypothetical protein EAI_00587 [Harpegnathos saltator]	Protein brambleberry OS=Danio rerio GN=bmb PE=2 SV=1	Putative uncharacterized protein OS=Harpegnathos saltator GN=EAI_00587 PE=4 SV=1	NA	NA	NA	NA
LOCMI00638	1.8073	0	0	1.2818	0	2.03463	LOCMI00638	LOCMI00638	LOCMI00638	LOCMI00638	LOCMI00638	LOCMI00638	LOCMI00638	LOCMI00638	LOCMI00638
LOCMI00639	0	0.601331	2.37769	0.932221	0.4543	0.214172	NA	LOCMI00639	hypothetical protein SDRG_10851 [Saprolegnia diclina VS20]	NA	Uncharacterized protein OS=Saprolegnia diclina VS20 GN=SDRG_10851 PE=4 SV=1	NA	NA	NA	NA
LOCMI00640	3.32924	3.00665	5.38109	3.14625	3.97513	2.67715	Myotubularin-related protein 5	Sbf1	Myotubularin-related protein 13 [Zootermopsis nevadensis]	Myotubularin-related protein 5 OS=Mus musculus GN=Sbf1 PE=1 SV=2	Uncharacterized protein OS=Nasonia vitripennis PE=3 SV=1	NA	GO:0016311; dephosphorylation; Biological Process GO:0016791; phosphatase activity; Molecular Function	IPR010569; Myotubularin-like phosphatase domain IPR017906; Myotubularin phosphatase domain	K18061
LOCMI00641	2.94876	3.60799	0.75085	1.51486	1.8172	7.06768	Amine oxidase [flavin-containing]	mao	Amine oxidase [flavin-containing] A [Zootermopsis nevadensis]	Amine oxidase [flavin-containing] OS=Oncorhynchus mykiss GN=mao PE=2 SV=2	Amine oxidase [flavin-containing] OS=Crassostrea gigas GN=CGI_10022845 PE=4 SV=1	COG1231|Monoamine oxidase|E|Amino acid transport and metabolism ;	GO:0016491; oxidoreductase activity; Molecular Function GO:0055114; oxidation-reduction process; Biological Process	IPR001613; Flavin amine oxidase IPR002937; Amine oxidase	NA
LOCMI00642	1.42682	2.25499	2.12741	1.16528	0.908601	1.28503	NEDD4-binding protein 2-like 1	N4bp2l1	hypothetical protein BRAFLDRAFT_66963 [Branchiostoma floridae] gb|EEN54584.1| hypothetical protein BRAFLDRAFT_66963 [Branchiostoma floridae]	NEDD4-binding protein 2-like 1 OS=Mus musculus GN=N4bp2l1 PE=2 SV=1	Putative uncharacterized protein OS=Branchiostoma floridae GN=BRAFLDRAFT_66963 PE=4 SV=1	NA	GO:0003824; catalytic activity; Molecular Function	IPR009097; RNA ligase/cyclic nucleotide phosphodiesterase	NA
LOCMI00644	0.285363	0	0	0	0	0	LOCMI00644	LOCMI00644	LOCMI00644	LOCMI00644	LOCMI00644	LOCMI00644	LOCMI00644	LOCMI00644	LOCMI00644
LOCMI00645	0.190242	0	0.375425	0.116528	0.113575	0.214172	Ankyrin repeat, PH and SEC7 domain containing protein secG	secG	PREDICTED: ankyrin repeat domain-containing protein 50-like [Amphimedon queenslandica]	Ankyrin repeat, PH and SEC7 domain containing protein secG OS=Dictyostelium discoideum GN=secG PE=2 SV=1	Uncharacterized protein (Fragment) OS=Amphimedon queenslandica GN=LOC100631512 PE=4 SV=1	COG0666|FOG: Ankyrin repeat|R|General function prediction only ;	GO:0005515; protein binding; Molecular Function	IPR002110; Ankyrin repeat IPR020683; Ankyrin repeat-containing domain	K16279
LOCMI00647	0	0	0	0	0	0	Bifunctional polynucleotide phosphatase/kinase	pnk1	hypothetical protein LOTGIDRAFT_126696 [Lottia gigantea]	Bifunctional polynucleotide phosphatase/kinase OS=Schizosaccharomyces pombe (strain 972 / ATCC 24843) GN=pnk1 PE=1 SV=2	Uncharacterized protein OS=Lottia gigantea GN=LOTGIDRAFT_126696 PE=4 SV=1	COG0241|Histidinol phosphatase and related phosphatases|E|Amino acid transport and metabolism ;	NA	IPR013954; Polynucleotide kinase 3 phosphatase IPR023214; HAD-like domain IPR027417; P-loop containing nucleoside triphosphate hydrolase	NA
LOCMI00648	0	0.450998	0.625708	0	0.340725	0	Cleavage and polyadenylation specificity factor subunit 4	CPSF4	PREDICTED: cleavage and polyadenylation specificity factor subunit 4 [Anas platyrhynchos]	Cleavage and polyadenylation specificity factor subunit 4 OS=Homo sapiens GN=CPSF4 PE=1 SV=1	Uncharacterized protein OS=Oreochromis niloticus GN=LOC100698039 PE=4 SV=1	COG5084|Cleavage and polyadenylation specificity factor (CPSF) Clipper subunit and related makorin family Zn-finger proteins|R|General function prediction only ;	GO:0046872; metal ion binding; Molecular Function	IPR000571; Zinc finger, CCCH-type	K14404 CPSF4, YTH1; cleavage and polyadenylation specificity factor subunit 4 K14404 Genetic Information Processing; Translation; mRNA surveillance pathway [PATH:ko03015] Human Diseases; Infectious diseases; Influenza A [PATH:ko05164]
LOCMI00649	5.70727	0.601331	0.875991	2.33055	3.86155	2.35589	Probable Dol-P-Man:Man(7)GlcNAc(2)-PP-Dol alpha-1,6-mannosyltransferase	ALG12	putative dolichyl-P-Man:Man(7)GlcNAc(2)-PP-dolichyl-alpha-1, 6-mannosyltransferase [Zootermopsis nevadensis]	Probable Dol-P-Man:Man(7)GlcNAc(2)-PP-Dol alpha-1,6-mannosyltransferase OS=Drosophila melanogaster GN=CG8412 PE=2 SV=1	Putative dolichyl-P-Man:Man(7)GlcNAc(2)-PP-dolichyl-alpha-1, 6-mannosyltransferase OS=Acromyrmex echinatior GN=G5I_01024 PE=4 SV=1	NA	GO:0016757; transferase activity, transferring glycosyl groups; Molecular Function	IPR005599; GPI mannosyltransferase	K03847 ALG12; alpha-1,6-mannosyltransferase [EC:2.4.1.260] [EC:2.4.1.260] Metabolism; Glycan biosynthesis and metabolism; Glycosyltransferases [BR:ko01003] Metabolism; Glycan biosynthesis and metabolism; N-Glycan biosynthesis [PATH:ko00510] Metabolism; Glycan biosynthesis and metabolism; Various types of N-glycan biosynthesis [PATH:ko00513]
LOCMI00650	32.5314	30.6679	33.7882	43.2318	50.8816	54.1855	Annexin A4	ANXA4	Annexin-B9 [Zootermopsis nevadensis]	Annexin A4 OS=Canis familiaris GN=ANXA4 PE=1 SV=2	Annexin OS=Tribolium castaneum GN=TcasGA2_TC010520 PE=3 SV=1	NA	GO:0005509; calcium ion binding; Molecular Function GO:0005544; calcium-dependent phospholipid binding; Molecular Function	IPR001464; Annexin IPR018502; Annexin repeat	NA
LOCMI00651	0	0	0.625708	0	0	0	Serendipity locus protein H-1	SRYC	Serendipity locus protein H-1 [Zootermopsis nevadensis]	NA	NA	NA	NA	NA	NA
LOCMI00653	1.71218	0.751664	1.12627	0.699166	2.2715	3.21258	NA	LOCMI00653	hypothetical protein L798_12523, partial [Zootermopsis nevadensis]	NA	Uncharacterized protein OS=Apis mellifera GN=LOC725840 PE=4 SV=2	NA	NA	NA	NA
LOCMI00654	0.190242	0	2.75312	0	0	0	26S proteasome non-ATPase regulatory subunit 14 homolog	RPN11	hypothetical protein F775_30029 [Aegilops tauschii]	26S proteasome non-ATPase regulatory subunit 14 homolog OS=Arabidopsis thaliana GN=RPN11 PE=1 SV=1	Uncharacterized protein OS=Hordeum vulgare var. distichum PE=4 SV=1	COG1310|Predicted metal-dependent protease of the PAD1/JAB1 superfamily|R|General function prediction only ;	NA	IPR024969; Rpn11/EIF3F C-terminal domain	K03030 PSMD14, RPN11, POH1; 26S proteasome regulatory subunit N11 K03030 Genetic Information Processing; Folding, sorting and degradation; Proteasome [PATH:ko03050] Human Diseases; Infectious diseases; Epstein-Barr virus infection [PATH:ko05169]
LOCMI00655	1.23658	0	0	0.582638	0.340725	0	LOCMI00655	LOCMI00655	LOCMI00655	LOCMI00655	LOCMI00655	LOCMI00655	LOCMI00655	LOCMI00655	LOCMI00655
LOCMI00656	2.18779	0	0	1.04875	0	0.53543	LOCMI00656	LOCMI00656	LOCMI00656	LOCMI00656	LOCMI00656	LOCMI00656	LOCMI00656	LOCMI00656	LOCMI00656
LOCMI00657	0	0	1.37656	0.466111	0.4543	0	Inositol monophosphatase 3	IMP3	L-galactose-1-phosphate phosphatase [Actinidia deliciosa]	Inositol monophosphatase 3 OS=Solanum lycopersicum GN=IMP3 PE=1 SV=1	L-galactose-1-phosphate phosphatase OS=Actinidia deliciosa PE=2 SV=1	NA	GO:0046854; phosphatidylinositol phosphorylation; Biological Process	IPR000760; Inositol monophosphatase	NA
LOCMI00658	16.0755	5.71264	5.25595	10.9536	1.02218	0.963774	Fibronectin, type III	LOCMI00658	NA	NA	NA	NA	GO:0005515; protein binding; Molecular Function	IPR003961; Fibronectin, type III	NA
LOCMI00659	0.665848	2.55566	3.0034	0.349583	1.59005	2.14172	LOCMI00659	LOCMI00659	LOCMI00659	LOCMI00659	LOCMI00659	LOCMI00659	LOCMI00659	LOCMI00659	LOCMI00659
LOCMI00660	0.190242	0	0.250283	0	0.22715	0.428344	LOCMI00660	LOCMI00660	LOCMI00660	LOCMI00660	LOCMI00660	LOCMI00660	LOCMI00660	LOCMI00660	LOCMI00660
LOCMI00661	2.37803	0.901996	0.75085	1.39833	3.06653	4.17636	BESS motif	LOCMI00661	PREDICTED: uncharacterized protein LOC100574550 [Acyrthosiphon pisum]	NA	Uncharacterized protein OS=Acyrthosiphon pisum PE=4 SV=1	NA	GO:0003677; DNA binding; Molecular Function	IPR004210; BESS motif	NA
LOCMI00662	22.734	27.3606	42.423	30.5302	14.8783	20.1322	Alpha-aminoadipic semialdehyde synthase, mitochondrial	Aass	hypothetical protein KGM_15754 [Danaus plexippus]	Alpha-aminoadipic semialdehyde synthase, mitochondrial OS=Rattus norvegicus GN=Aass PE=2 SV=1	Uncharacterized protein OS=Danaus plexippus GN=KGM_15754 PE=4 SV=1	COG1748|Saccharopine dehydrogenase and related proteins|E|Amino acid transport and metabolism ;	GO:0016491; oxidoreductase activity; Molecular Function GO:0055114; oxidation-reduction process; Biological Process	IPR005097; Saccharopine dehydrogenase / Homospermidine synthase	K14157 AASS; alpha-aminoadipic semialdehyde synthase [EC:1.5.1.8 1.5.1.9] [EC:1.5.1.8 1.5.1.9] Metabolism; Amino acid metabolism; Lysine degradation [PATH:ko00310]
LOCMI00663	0	0	0	0	0	0	LOCMI00663	LOCMI00663	LOCMI00663	LOCMI00663	LOCMI00663	LOCMI00663	LOCMI00663	LOCMI00663	LOCMI00663
LOCMI00664	0	2.25499	2.37769	0.466111	0.908601	1.60629	LOCMI00664	LOCMI00664	LOCMI00664	LOCMI00664	LOCMI00664	LOCMI00664	LOCMI00664	LOCMI00664	LOCMI00664
LOCMI00665	0	0	0	0	0.22715	0	Rho-related protein racE	racE	Raclike protein, partial [Acanthamoeba castellanii str. Neff] gb|ELR25649.1| Raclike protein, partial [Acanthamoeba castellanii str. Neff]	Rho-related protein racE OS=Dictyostelium discoideum GN=racE PE=1 SV=1	Raclike protein (Fragment) OS=Acanthamoeba castellanii str. Neff GN=ACA1_119270 PE=3 SV=1	COG1100|GTPase SAR1 and related small G proteins|R|General function prediction only ;	GO:0003924; GTPase activity; Molecular Function GO:0005525; GTP binding; Molecular Function GO:0005622; intracellular; Cellular Component GO:0006184; GTP catabolic process; Biological Process GO:0007165; signal transduction; Biological Process GO:0007264; small GTPase mediated signal transduction; Biological Process GO:0015031; protein transport; Biological Process GO:0016020; membrane; Cellular …	IPR001806; Small GTPase superfamily IPR003578; Small GTPase superfamily, Rho type IPR003579; Small GTPase superfamily, Rab type IPR005225; Small GTP-binding protein domain IPR020849; Small GTPase superfamily, Ras type IPR027417; P-loop containing nucleoside triphosphate hydrolase	K04392 RAC1; Ras-related C3 botulinum toxin substrate 1 K04392 Environmental Information Processing; Signal transduction; Two-component system [BR:ko02022] Environmental Information Processing; Signal transduction; Ras signaling pathway [PATH:ko04014] Environmental Information Processing; Signal transduction; Rap1 signaling pathway [PATH:ko04015] Environmental Information Processing; Signal trans…
LOCMI00666	0.285363	1.35299	1.75198	1.63139	1.13575	0.321258	PAX3- and PAX7-binding protein 1	PAXBP1	GC-rich sequence DNA-binding factor-like protein [Camponotus floridanus]	PAX3- and PAX7-binding protein 1 OS=Homo sapiens GN=PAXBP1 PE=1 SV=2	GC-rich sequence DNA-binding factor-like protein OS=Camponotus floridanus GN=EAG_04080 PE=4 SV=1	NA	GO:0003677; DNA binding; Molecular Function GO:0003700; sequence-specific DNA binding transcription factor activity; Molecular Function GO:0005634; nucleus; Cellular Component GO:0006355; regulation of transcription, DNA-templated; Biological Process	IPR012890; GC-rich sequence DNA-binding factor IPR022783; GC-rich sequence DNA-binding factor domain	K13211
LOCMI00667	0	1.20266	0	0	0	0	LOCMI00667	LOCMI00667	LOCMI00667	LOCMI00667	LOCMI00667	LOCMI00667	LOCMI00667	LOCMI00667	LOCMI00667
LOCMI00668	0	0	0	0	0	0	Diguanylate phosphodiesterase, EAL domain EF-hand domain pair	LOCMI00668	NA	NA	NA	NA	GO:0005509; calcium ion binding; Molecular Function	IPR001633; Diguanylate phosphodiesterase, EAL domain IPR011992; EF-hand domain pair	NA
LOCMI00669	0.951212	1.50333	12.0136	5.4768	4.88373	2.14172	Profilin-3	PRO3	putative profilin [Hirudo medicinalis]	Profilin-3 OS=Nicotiana tabacum GN=PRO3 PE=2 SV=1	Profilin OS=Hirudo medicinalis PE=2 SV=1	NA	GO:0003779; actin binding; Molecular Function GO:0030036; actin cytoskeleton organization; Biological Process	IPR005455; Profilin	NA
LOCMI00670	0	0	0	0	0	0	Mitochondrial enolase superfamily member 1	ENOSF1	Mitochondrial enolase superfamily member 1 [Zootermopsis nevadensis]	NA	NA	NA	NA	NA	NA
LOCMI00673	15.5999	18.3406	16.769	23.5386	38.7291	25.2723	Stabilin-1	STAB1	Stabilin-1 [Zootermopsis nevadensis]	NA	Putative uncharacterized protein OS=Pediculus humanus subsp. corporis GN=Phum_PHUM136520 PE=4 SV=1	NA	NA	NA	NA
LOCMI00674	0.190242	0	1.75198	0	0	0	nucleoporin nup93	nup93	nucleoporin nup93 [Naegleria gruberi] gb|EFC48642.1| nucleoporin nup93 [Naegleria gruberi]	NA	Nucleoporin nup93 OS=Naegleria gruberi GN=NAEGRDRAFT_78412 PE=4 SV=1	NA	GO:0005643; nuclear pore; Cellular Component GO:0006810; transport; Biological Process	IPR007231; Nucleoporin interacting component Nup93/Nic96	NA
LOCMI00676	9.51212	6.61464	4.88052	5.70985	8.06383	7.38894	Protoporphyrinogen oxidase	PPOX	Protoporphyrinogen oxidase [Zootermopsis nevadensis]	Protoporphyrinogen oxidase OS=Homo sapiens GN=PPOX PE=1 SV=1	AGAP003704-PA OS=Anopheles gambiae GN=AGAP003704 PE=4 SV=2	COG1232|Protoporphyrinogen oxidase|H|Coenzyme transport and metabolism ;	GO:0004729; oxygen-dependent protoporphyrinogen oxidase activity; Molecular Function GO:0006779; porphyrin-containing compound biosynthetic process; Biological Process GO:0016491; oxidoreductase activity; Molecular Function GO:0055114; oxidation-reduction process; Biological Process	IPR001613; Flavin amine oxidase IPR002937; Amine oxidase IPR004572; Protoporphyrinogen oxidase IPR027418; Protoporphyrinogen oxidase, C-terminal domain	K00231 PPOX, hemY; oxygen-dependent protoporphyrinogen oxidase [EC:1.3.3.4] [EC:1.3.3.4] Metabolism; Metabolism of cofactors and vitamins; Porphyrin and chlorophyll metabolism [PATH:ko00860]
LOCMI00677	3.32924	1.50333	3.12854	1.16528	1.13575	1.71338	LOCMI00677	LOCMI00677	LOCMI00677	LOCMI00677	LOCMI00677	LOCMI00677	LOCMI00677	LOCMI00677	LOCMI00677
LOCMI00678	0	0	0	0	0	0	LOCMI00678	LOCMI00678	LOCMI00678	LOCMI00678	LOCMI00678	LOCMI00678	LOCMI00678	LOCMI00678	LOCMI00678
LOCMI00679	0	0.300665	0.250283	0.582638	0	0	Glycoside hydrolase, catalytic domain Glycoside hydrolase, superfamily	LOCMI00679	hypothetical protein [Cyanothece sp. PCC 7425] ref|YP_002481761.1| hypothetical protein Cyan7425_1014 [Cyanothece sp. PCC 7425] gb|ACL43400.1| hypothetical protein Cyan7425_1014 [Cyanothece sp. PCC 7425]	NA	Uncharacterized protein (Precursor) OS=Cyanothece sp. (strain PCC 7425 / ATCC 29141) GN=Cyan7425_1014 PE=4 SV=1	NA	GO:0005975; carbohydrate metabolic process; Biological Process	IPR013781; Glycoside hydrolase, catalytic domain IPR017853; Glycoside hydrolase, superfamily	NA
LOCMI00680	1306.3	1635.47	1617.21	1820.51	2241.74	1806.33	60S ribosomal protein L11	RpL11	60S ribosomal protein L11 [Coptotermes formosanus]	60S ribosomal protein L11 OS=Drosophila melanogaster GN=RpL11 PE=1 SV=2	Uncharacterized protein OS=Apis mellifera GN=LOC552253 PE=3 SV=1	COG0094|Ribosomal protein L5|J|Translation, ribosomal structure and biogenesis ;	GO:0003735; structural constituent of ribosome; Molecular Function GO:0005622; intracellular; Cellular Component GO:0005840; ribosome; Cellular Component GO:0006412; translation; Biological Process	IPR002132; Ribosomal protein L5 IPR020929; Ribosomal protein L5, conserved site IPR022803; Ribosomal protein L5 domain	K02868 RP-L11e, RPL11; large subunit ribosomal protein L11e K02868 Genetic Information Processing; Translation; Ribosome [PATH:ko03010]
LOCMI00681	0.475606	0.300665	0	0.233055	0.22715	0.749602	Ras-related protein Rap-1b	rap1b	ras protein [Bombyx mori] dbj|BAD83770.1| ras protein [Bombyx mori]	Ras-related protein Rap-1b OS=Cyprinus carpio GN=rap1b PE=2 SV=1	Ras protein OS=Bombyx mori GN=ras3 PE=2 SV=1	COG1100|GTPase SAR1 and related small G proteins|R|General function prediction only ;	GO:0003924; GTPase activity; Molecular Function GO:0005525; GTP binding; Molecular Function GO:0005622; intracellular; Cellular Component GO:0006184; GTP catabolic process; Biological Process GO:0007165; signal transduction; Biological Process GO:0007264; small GTPase mediated signal transduction; Biological Process GO:0015031; protein transport; Biological Process GO:0016020; membrane; Cellular …	IPR001806; Small GTPase superfamily IPR003578; Small GTPase superfamily, Rho type IPR003579; Small GTPase superfamily, Rab type IPR005225; Small GTP-binding protein domain IPR020849; Small GTPase superfamily, Ras type IPR027417; P-loop containing nucleoside triphosphate hydrolase	NA
LOCMI00682	1.90242	0.901996	3.25368	5.36027	4.65658	4.39053	LOCMI00682	LOCMI00682	LOCMI00682	LOCMI00682	LOCMI00682	LOCMI00682	LOCMI00682	LOCMI00682	LOCMI00682
LOCMI00684	0	0	1.5017	0.466111	0.4543	0	LOCMI00684	LOCMI00684	LOCMI00684	LOCMI00684	LOCMI00684	LOCMI00684	LOCMI00684	LOCMI00684	LOCMI00684
LOCMI00686	0	0	0	0	0	0	Probable multidrug resistance-associated protein lethal(2)03659	ABCC2	PREDICTED: probable multidrug resistance-associated protein lethal(2)03659-like [Bombus impatiens]	Probable multidrug resistance-associated protein lethal(2)03659 OS=Drosophila melanogaster GN=l(2)03659 PE=2 SV=3	Uncharacterized protein OS=Atta cephalotes PE=4 SV=1	COG1132|ABC-type multidrug transport system, ATPase and permease components|V|Defense mechanisms ;	GO:0005524; ATP binding; Molecular Function GO:0006810; transport; Biological Process GO:0016021; integral component of membrane; Cellular Component GO:0042626; ATPase activity, coupled to transmembrane movement of substances; Molecular Function GO:0055085; transmembrane transport; Biological Process	IPR001140; ABC transporter, transmembrane domain IPR011527; ABC transporter type 1, transmembrane domain	NA
LOCMI00687	0	0	0.625708	0.116528	0	0	Crooked neck-like protein 1	crnkl1	hypothetical protein PRUPE_ppa002157mg [Prunus persica] gb|EMJ11518.1| hypothetical protein PRUPE_ppa002157mg [Prunus persica]	Crooked neck-like protein 1 OS=Dictyostelium discoideum GN=crnkl1 PE=3 SV=1	Uncharacterized protein OS=Prunus persica GN=PRUPE_ppa002157mg PE=4 SV=1	NA	GO:0005515; protein binding; Molecular Function GO:0005622; intracellular; Cellular Component GO:0006396; RNA processing; Biological Process	IPR003107; RNA-processing protein, HAT helix IPR011990; Tetratricopeptide-like helical	NA
LOCMI00688	0	0	0.500566	0	0	0	T-complex protein 1 subunit gamma	Cctgamma	T-complex protein 1 gamma subunit [Coccomyxa subellipsoidea C-169] gb|EIE19458.1| T-complex protein 1 gamma subunit [Coccomyxa subellipsoidea C-169]	T-complex protein 1 subunit gamma OS=Drosophila melanogaster GN=Cctgamma PE=2 SV=2	T-complex protein 1 gamma subunit OS=Coccomyxa subellipsoidea C-169 GN=COCSUDRAFT_44765 PE=3 SV=1	COG0459|Chaperonin GroEL (HSP60 family)|O|Posttranslational modification, protein turnover, chaperones ;	GO:0005524; ATP binding; Molecular Function GO:0006457; protein folding; Biological Process GO:0044267; cellular protein metabolic process; Biological Process GO:0051082; unfolded protein binding; Molecular Function	IPR002194; Chaperonin TCP-1, conserved site IPR002423; Chaperonin Cpn60/TCP-1 IPR017998; Chaperone tailless complex polypeptide 1 (TCP-1) IPR027410; TCP-1-like chaperonin intermediate domain IPR027413; GroEL-like equatorial domain	NA
LOCMI00689	3.6146	1.80399	0.250283	5.24374	3.52083	5.56847	La-related protein 7	larp7	La-related protein 7 [Zootermopsis nevadensis]	La-related protein 7 OS=Xenopus tropicalis GN=larp7 PE=2 SV=1	Lupus la ribonucleoprotein, putative OS=Pediculus humanus subsp. corporis GN=Phum_PHUM596880 PE=4 SV=1	COG0724|RNA-binding proteins (RRM domain)|R|General function prediction only ;	GO:0000166; nucleotide binding; Molecular Function GO:0003676; nucleic acid binding; Molecular Function	IPR000504; RNA recognition motif domain IPR006630; RNA-binding protein Lupus La IPR011991; Winged helix-turn-helix DNA-binding domain IPR012677; Nucleotide-binding, alpha-beta plait	K15191
LOCMI00690	0	0	0	0	0	0	LOCMI00690	LOCMI00690	LOCMI00690	LOCMI00690	LOCMI00690	LOCMI00690	LOCMI00690	LOCMI00690	LOCMI00690
LOCMI00691	5.51703	7.8173	9.76105	6.7586	10.9032	4.71179	Histone deacetylase complex subunit SAP18	Bin1	hypothetical protein SINV_07622 [Solenopsis invicta]	Histone deacetylase complex subunit SAP18 OS=Drosophila melanogaster GN=Bin1 PE=1 SV=1	Uncharacterized protein OS=Atta cephalotes PE=4 SV=1	NA	NA	IPR010516; Sin3 associated polypeptide p18 IPR017250; Histone deacetylase complex, SAP18 subunit	K14324 SAP18; histone deacetylase complex subunit SAP18 K14324 Genetic Information Processing; Translation; RNA transport [PATH:ko03013] Genetic Information Processing; Translation; mRNA surveillance pathway [PATH:ko03015]
LOCMI00692	42.1387	49.1588	40.9213	37.0558	76.436	50.4375	Prefoldin subunit 2	PFDN2	prefoldin subunit, putative [Pediculus humanus corporis] gb|EEB14994.1| prefoldin subunit, putative [Pediculus humanus corporis]	Prefoldin subunit 2 OS=Homo sapiens GN=PFDN2 PE=1 SV=1	Prefoldin subunit, putative OS=Pediculus humanus subsp. corporis GN=Phum_PHUM338400 PE=4 SV=1	NA	GO:0006457; protein folding; Biological Process GO:0016272; prefoldin complex; Cellular Component GO:0051082; unfolded protein binding; Molecular Function	IPR002777; Prefoldin beta-like IPR009053; Prefoldin IPR027235; Prefoldin subunit 2	K09549
LOCMI00693	2.85363	1.35299	3.0034	1.74791	1.93078	1.39212	TATA-binding protein-associated factor 172	BTAF1	TATA-binding protein-associated factor, putative [Pediculus humanus corporis] gb|EEB16433.1| TATA-binding protein-associated factor, putative [Pediculus humanus corporis]	TATA-binding protein-associated factor 172 OS=Homo sapiens GN=BTAF1 PE=1 SV=2	TATA-binding protein-associated factor, putative OS=Pediculus humanus subsp. corporis GN=Phum_PHUM422980 PE=4 SV=1	NA	NA	NA	NA
LOCMI00694	44.3265	36.8315	31.0351	28.5493	30.5517	29.877	Spermatogenesis-associated protein 20	SPATA20	hypothetical protein L798_11290 [Zootermopsis nevadensis]	Spermatogenesis-associated protein 20 OS=Homo sapiens GN=SPATA20 PE=2 SV=3	Spermatogenesis-associated protein (Fragment) OS=Anoplophora glabripennis GN=SPT20 PE=4 SV=1	COG1331|Highly conserved protein containing a thioredoxin domain|O|Posttranslational modification, protein turnover, chaperones ;	GO:0003824; catalytic activity; Molecular Function	IPR008928; Six-hairpin glycosidase-like IPR012341; Six-hairpin glycosidase	K06888
LOCMI00695	0	0	0.375425	0	0	0	2Fe-2S ferredoxin	fdxB	PREDICTED: 2Fe-2S ferredoxin-like [Cucumis sativus] ref|XP_004164310.1| PREDICTED: 2Fe-2S ferredoxin-like [Cucumis sativus]	2Fe-2S ferredoxin OS=Rickettsia montanensis GN=fdxB PE=3 SV=1	Putative uncharacterized protein OS=Picea sitchensis PE=2 SV=1	COG0633|Ferredoxin|C|Energy production and conversion ;	GO:0009055; electron carrier activity; Molecular Function GO:0051536; iron-sulfur cluster binding; Molecular Function GO:0051537; 2 iron, 2 sulfur cluster binding; Molecular Function	IPR001041; 2Fe-2S ferredoxin-type domain IPR001055; Adrenodoxin IPR012675; Beta-grasp domain IPR018298; Adrenodoxin, iron-sulphur binding site	NA
LOCMI00696	49.3679	41.1912	40.1705	58.2638	60.6491	42.6202	LOCMI00696	LOCMI00696	LOCMI00696	LOCMI00696	LOCMI00696	LOCMI00696	LOCMI00696	LOCMI00696	LOCMI00696
LOCMI00697	0	0	0.875991	0.582638	0.22715	0.214172	SH3 and FCH domain-containing protein DDB_G0274695	DDB_G0274695	SH3 domain-containing protein [Dictyostelium discoideum AX4] sp|Q555L8.1|Y4695_DICDI RecName: Full=SH3 and FCH domain-containing protein DDB_G0274695 [Dictyostelium discoideum] gb|EAL70240.1| SH3 domain-containing protein [Dictyostelium discoideum AX4]	SH3 and FCH domain-containing protein DDB_G0274695 OS=Dictyostelium discoideum GN=DDB_G0274695 PE=4 SV=1	Putative uncharacterized protein OS=Dictyostelium purpureum GN=DICPUDRAFT_48387 PE=4 SV=1	NA	GO:0005515; protein binding; Molecular Function	IPR001452; Src homology-3 domain	K12804 PSTPIP1; proline-serine-threonine phosphatase interacting protein 1 K12804 Organismal Systems; Immune system; NOD-like receptor signaling pathway [PATH:ko04621]
LOCMI00698	0.951212	0.901996	0.500566	1.16528	0.4543	1.07086	Unconventional myosin-X	MYO10	PREDICTED: myosin-I heavy chain-like isoform X1 [Acyrthosiphon pisum]	Unconventional myosin-X OS=Bos taurus GN=MYO10 PE=1 SV=1	Uncharacterized protein (Fragment) OS=Rhodnius prolixus PE=4 SV=1	COG5022|Myosin heavy chain|Z|Cytoskeleton ;	GO:0003774; motor activity; Molecular Function GO:0005515; protein binding; Molecular Function GO:0005524; ATP binding; Molecular Function GO:0005856; cytoskeleton; Cellular Component GO:0016459; myosin complex; Cellular Component	IPR000048; IQ motif, EF-hand binding site IPR000299; FERM domain IPR000857; MyTH4 domain IPR001609; Myosin head, motor domain IPR014352; FERM/acyl-CoA-binding protein, 3-helical bundle IPR019748; FERM central domain IPR019749; Band 4.1 domain IPR027417; P-loop containing nucleoside triphosphate hydrolase	NA
LOCMI00699	0	0	0.375425	0.349583	0	0.321258	LOCMI00699	LOCMI00699	LOCMI00699	LOCMI00699	LOCMI00699	LOCMI00699	LOCMI00699	LOCMI00699	LOCMI00699
LOCMI00700	2.09267	3.15699	6.63251	1.39833	1.8172	1.28503	Delta(24)-sterol reductase	Dhcr24	24-dehydrocholesterol reductase [Zootermopsis nevadensis]	Delta(24)-sterol reductase OS=Mus musculus GN=Dhcr24 PE=2 SV=1	Uncharacterized protein (Fragment) OS=Sarcophilus harrisii GN=DHCR24 PE=4 SV=1	NA	NA	NA	K09828 DHCR24; delta24-sterol reductase [EC:1.3.1.72] [EC:1.3.1.72] Metabolism; Lipid metabolism; Steroid biosynthesis [PATH:ko00100]
LOCMI00702	0	0	1.00113	0.466111	0.4543	0.428344	Putative uncharacterized protein (Fragment)	LOCMI00702	hypothetical protein SINV_01189 [Solenopsis invicta]	NA	Putative uncharacterized protein (Fragment) OS=Solenopsis invicta GN=SINV_01189 PE=4 SV=1	NA	GO:0003677; DNA binding; Molecular Function	IPR007889; DNA binding HTH domain, Psq-type IPR009057; Homeodomain-like	NA
LOCMI00703	0.285363	0	0.875991	0	0	0	26S protease regulatory subunit 7	psmC2	26S protease regulatory subunit 7 [Rhizopus delemar RA 99-880]	26S protease regulatory subunit 7 OS=Dictyostelium discoideum GN=psmC2 PE=1 SV=1	26S protease regulatory subunit 7 OS=Rhizopus delemar (strain RA 99-880 / ATCC MYA-4621 / FGSC 9543 / NRRL 43880) GN=RO3G_01562 PE=4 SV=1	COG1222|ATP-dependent 26S proteasome regulatory subunit|O|Posttranslational modification, protein turnover, chaperones ;	GO:0000166; nucleotide binding; Molecular Function GO:0005524; ATP binding; Molecular Function GO:0017111; nucleoside-triphosphatase activity; Molecular Function	IPR003593; AAA+ ATPase domain IPR003959; ATPase, AAA-type, core IPR003960; ATPase, AAA-type, conserved site IPR027417; P-loop containing nucleoside triphosphate hydrolase	NA
LOCMI00704	0	0	0	0	0	0.321258	LOCMI00704	LOCMI00704	LOCMI00704	LOCMI00704	LOCMI00704	LOCMI00704	LOCMI00704	LOCMI00704	LOCMI00704
LOCMI00705	0.475606	0	0	0	1.13575	0	LOCMI00705	LOCMI00705	LOCMI00705	LOCMI00705	LOCMI00705	LOCMI00705	LOCMI00705	LOCMI00705	LOCMI00705
LOCMI00706	3.80485	6.31397	7.00793	8.38999	5.56518	5.67556	U3 small nucleolar RNA-associated protein 15 homolog	UTP15	U3 small nucleolar RNA-associated protein 15-like protein [Zootermopsis nevadensis]	U3 small nucleolar RNA-associated protein 15 homolog OS=Gallus gallus GN=UTP15 PE=2 SV=1	Uncharacterized protein OS=Apis mellifera GN=LOC551639 PE=4 SV=1	COG2319|FOG: WD40 repeat|R|General function prediction only ;	GO:0005515; protein binding; Molecular Function GO:0005730; nucleolus; Cellular Component GO:0006364; rRNA processing; Biological Process	IPR001680; WD40 repeat IPR015943; WD40/YVTN repeat-like-containing domain IPR017986; WD40-repeat-containing domain IPR018983; U3 small nucleolar RNA-associated protein 15, C-terminal	K14549 UTP15; U3 small nucleolar RNA-associated protein 15 K14549 Genetic Information Processing; Translation; Ribosome biogenesis in eukaryotes [PATH:ko03008]
LOCMI00708	1960.92	3492.98	3134.92	1574.64	1410.49	1228.28	Protein QIL1	LOCMI00708	Protein QIL1 [Zootermopsis nevadensis]	NA	NA	NA	NA	NA	NA
LOCMI00709	1.90242	1.20266	2.50283	0.932221	1.3629	0.856688	ATP-dependent DNA helicase PIF1	Pif1	ATP-dependent DNA helicase PIF1 [Zootermopsis nevadensis]	ATP-dependent DNA helicase PIF1 OS=Rattus norvegicus GN=Pif1 PE=2 SV=1	ATP-dependent DNA helicase PIF1 OS=Anolis carolinensis GN=PIF1 PE=3 SV=2	COG0507|ATP-dependent exoDNAse (exonuclease V), alpha subunit - helicase superfamily I member|L|Replication, recombination and repair ;	GO:0000723; telomere maintenance; Biological Process GO:0003678; DNA helicase activity; Molecular Function GO:0006281; DNA repair; Biological Process	IPR010285; DNA helicase Pif1	K15255
LOCMI00710	0	0	0	0	0	0	Threonine--tRNA ligase, cytoplasmic	trs-1	Protein CBR-TARS-1 [Caenorhabditis briggsae]	Threonine--tRNA ligase, cytoplasmic OS=Caenorhabditis elegans GN=trs-1 PE=3 SV=1	Protein CBR-TARS-1 OS=Caenorhabditis briggsae GN=tars-1 PE=3 SV=2	NA	NA	IPR012675; Beta-grasp domain IPR012676; TGS-like	NA
LOCMI00711	3.89997	8.11797	32.9122	14.566	9.76746	16.2771	LOCMI00711	LOCMI00711	LOCMI00711	LOCMI00711	LOCMI00711	LOCMI00711	LOCMI00711	LOCMI00711	LOCMI00711
LOCMI00712	0	0	0	0	0	0.53543	LOCMI00712	LOCMI00712	LOCMI00712	LOCMI00712	LOCMI00712	LOCMI00712	LOCMI00712	LOCMI00712	LOCMI00712
LOCMI00713	1.23658	0.300665	1.25142	1.86444	0.68145	1.4992	TD and POZ domain-containing protein 1	Tdpoz1	Kelch repeat and BTB domain-containing protein 4 [Zootermopsis nevadensis]	TD and POZ domain-containing protein 1 OS=Mus musculus GN=Tdpoz1 PE=2 SV=2	Putative uncharacterized protein OS=Tribolium castaneum GN=TcasGA2_TC012517 PE=4 SV=1	NA	GO:0005515; protein binding; Molecular Function	IPR000210; BTB/POZ-like IPR011333; BTB/POZ fold IPR013069; BTB/POZ	NA
LOCMI00714	0	0	0	0	0	0	TLR4 interactor with leucine rich repeats	Tril	PREDICTED: phospholipase A2 inhibitor-like [Python bivittatus]	TLR4 interactor with leucine rich repeats OS=Rattus norvegicus GN=Tril PE=2 SV=1	Leucine-rich repeat neuronal protein 2 OS=Acromyrmex echinatior GN=G5I_09996 PE=4 SV=1	NA	NA	NA	NA
LOCMI00715	0.475606	0.300665	0.375425	0.466111	0.340725	0.642516	Putative uncharacterized protein	LOCMI00715	hypothetical protein L798_00988 [Zootermopsis nevadensis]	NA	Putative uncharacterized protein OS=Pediculus humanus subsp. corporis GN=Phum_PHUM405170 PE=4 SV=1	NA	NA	NA	NA
LOCMI00716	43.0899	50.0608	50.3069	47.1937	52.131	56.006	Importin subunit alpha-3	Kpna4	Importin subunit alpha-4 [Zootermopsis nevadensis]	Importin subunit alpha-3 OS=Mus musculus GN=Kpna4 PE=1 SV=1	Importin subunit alpha OS=Camponotus floridanus GN=EAG_14070 PE=3 SV=1	COG5064|Karyopherin (importin) alpha|U|Intracellular trafficking, secretion, and vesicular transport ;	GO:0005488; binding; Molecular Function GO:0005515; protein binding; Molecular Function	IPR000225; Armadillo IPR011989; Armadillo-like helical IPR016024; Armadillo-type fold	NA
LOCMI00717	5.23166	4.66031	5.00566	5.82638	4.88373	6.63934	LOCMI00717	LOCMI00717	LOCMI00717	LOCMI00717	LOCMI00717	LOCMI00717	LOCMI00717	LOCMI00717	LOCMI00717
LOCMI00721	0	0	0	0	0	0	60S ribosomal protein L38	RpL38	TPA: putative 60S ribosomal protein L38 isoform 1 [Spadella cephaloptera]	60S ribosomal protein L38 OS=Anopheles gambiae GN=RpL38 PE=3 SV=2	Putative 60S ribosomal protein L38 isoform 1 OS=Spadella cephaloptera GN=rpl38.1 PE=3 SV=1	NA	GO:0003735; structural constituent of ribosome; Molecular Function GO:0005622; intracellular; Cellular Component GO:0005840; ribosome; Cellular Component GO:0006412; translation; Biological Process	IPR002675; Ribosomal protein L38e	NA
LOCMI00722	2.75851	2.55566	3.62911	6.99166	1.93078	3.96218	Solute carrier family 12 member 2	SLC12A2	Solute carrier family 12 member 2, partial [Zootermopsis nevadensis]	Solute carrier family 12 member 2 OS=Squalus acanthias GN=SLC12A2 PE=1 SV=1	Amino acid permease OS=Musca domestica PE=2 SV=1	COG0531|Amino acid transporters|E|Amino acid transport and metabolism ;	GO:0005524; ATP binding; Molecular Function GO:0006810; transport; Biological Process GO:0016020; membrane; Cellular Component GO:0016021; integral component of membrane; Cellular Component GO:0042626; ATPase activity, coupled to transmembrane movement of substances; Molecular Function GO:0055085; transmembrane transport; Biological Process	IPR004841; Amino acid permease/ SLC12A domain IPR011527; ABC transporter type 1, transmembrane domain	NA
LOCMI00723	6.46824	6.31397	5.63137	6.40902	7.38238	8.35271	U3 small nucleolar RNA-associated protein 15 homolog	utp15	PREDICTED: U3 small nucleolar RNA-associated protein 15 homolog [Apis florea]	U3 small nucleolar RNA-associated protein 15 homolog OS=Danio rerio GN=utp15 PE=2 SV=1	Uncharacterized protein OS=Apis mellifera GN=LOC551639 PE=4 SV=1	NA	GO:0005515; protein binding; Molecular Function	IPR015943; WD40/YVTN repeat-like-containing domain IPR017986; WD40-repeat-containing domain	NA
LOCMI00724	5.80239	3.30732	3.50397	5.82638	4.42943	5.78265	LOCMI00724	LOCMI00724	LOCMI00724	LOCMI00724	LOCMI00724	LOCMI00724	LOCMI00724	LOCMI00724	LOCMI00724
LOCMI00727	1.14145	0	3.0034	0.349583	0.340725	1.28503	AGAP002074-PA	LOCMI00727	AGAP002074-PA [Anopheles gambiae str. PEST] gb|EDO63214.2| AGAP002074-PA [Anopheles gambiae str. PEST]	NA	AGAP002074-PA OS=Anopheles gambiae GN=AgaP_AGAP002074 PE=4 SV=2	NA	NA	IPR006578; MADF domain	NA
LOCMI00728	0.475606	0.450998	0.250283	0.699166	1.24933	1.17795	40S ribosomal protein S6	RpS6	40S ribosomal protein S6 [Zootermopsis nevadensis]	40S ribosomal protein S6 OS=Manduca sexta GN=RpS6 PE=2 SV=1	40S ribosomal protein S6 OS=Rhodnius prolixus PE=2 SV=1	COG2125|Ribosomal protein S6E (S10)|J|Translation, ribosomal structure and biogenesis ;	GO:0003735; structural constituent of ribosome; Molecular Function GO:0005622; intracellular; Cellular Component GO:0005840; ribosome; Cellular Component GO:0006412; translation; Biological Process	IPR001377; Ribosomal protein S6e IPR014401; Ribosomal protein S6, eukaryotic IPR018282; Ribosomal protein S6e, conserved site	NA
LOCMI00729	0	0	0	0	0	0	LOCMI00729	LOCMI00729	LOCMI00729	LOCMI00729	LOCMI00729	LOCMI00729	LOCMI00729	LOCMI00729	LOCMI00729
LOCMI00730	0	0.300665	0.250283	0.233055	1.24933	0	Nucleolar protein of 40 kDa	ZCCHC17	Nucleolar protein of 40 kDa [Cerapachys biroi]	Nucleolar protein of 40 kDa OS=Homo sapiens GN=ZCCHC17 PE=1 SV=1	Uncharacterized protein OS=Atta cephalotes PE=4 SV=1	NA	GO:0003676; nucleic acid binding; Molecular Function GO:0008270; zinc ion binding; Molecular Function	IPR001878; Zinc finger, CCHC-type	NA
LOCMI00731	0.85609	1.95433	2.75312	6.64208	7.49595	6.53225	LOCMI00731	LOCMI00731	LOCMI00731	LOCMI00731	LOCMI00731	LOCMI00731	LOCMI00731	LOCMI00731	LOCMI00731
LOCMI00734	10.6536	10.5233	10.1365	15.3816	17.1498	22.1668	Eukaryotic translation initiation factor 1A, X-chromosomal	EIF1AX	eukaryotic translation initiation factor 1A [Danaus plexippus]	Eukaryotic translation initiation factor 1A, X-chromosomal OS=Pongo abelii GN=EIF1AX PE=2 SV=3	Eukaryotic translation initiation factor 1A OS=Pararge aegeria PE=3 SV=1	COG0361|Translation initiation factor 1 (IF-1)|J|Translation, ribosomal structure and biogenesis ;	GO:0003723; RNA binding; Molecular Function GO:0003743; translation initiation factor activity; Molecular Function GO:0006413; translational initiation; Biological Process	IPR001253; Translation initiation factor 1A (eIF-1A) IPR006196; RNA-binding domain, S1, IF1 type IPR012340; Nucleic acid-binding, OB-fold IPR018104; Translation initiation factor 1A (eIF-1A), conserved site	K03236 EIF1A; translation initiation factor 1A K03236 Genetic Information Processing; Translation; RNA transport [PATH:ko03013]
LOCMI00735	0.85609	0	0.625708	0.582638	2.61223	1.92755	PREDICTED: multidrug resistance-associated protein 5-like	ABCC2	PREDICTED: multidrug resistance-associated protein 5-like [Lepisosteus oculatus]	NA	Putative uncharacterized protein (Fragment) OS=Branchiostoma floridae GN=BRAFLDRAFT_255403 PE=3 SV=1	NA	NA	NA	NA
LOCMI00736	0	0	6.50736	0.349583	0	0.321258	60S ribosomal protein L9-A	rpl9a	ribosomal protein L6 [Coniophora puteana RWD-64-598 SS2] gb|EIW82100.1| ribosomal protein L6 [Coniophora puteana RWD-64-598 SS2]	60S ribosomal protein L9-A OS=Schizosaccharomyces pombe (strain 972 / ATCC 24843) GN=rpl9a PE=3 SV=1	Uncharacterized protein OS=Rhizophagus irregularis (strain DAOM 181602 / DAOM 197198 / MUCL 43194) GN=GLOINDRAFT_337403 PE=4 SV=1	COG0097|Ribosomal protein L6P/L9E|J|Translation, ribosomal structure and biogenesis ;	GO:0003735; structural constituent of ribosome; Molecular Function GO:0005840; ribosome; Cellular Component GO:0006412; translation; Biological Process GO:0019843; rRNA binding; Molecular Function	IPR000702; Ribosomal protein L6 IPR020040; Ribosomal protein L6, alpha-beta domain	NA
LOCMI00737	41.3777	72.6107	74.7095	41.0177	36.4576	34.6959	Sorting and assembly machinery component 50 homolog	SAMM50	Sorting and assembly machinery component 50-like protein [Zootermopsis nevadensis]	Sorting and assembly machinery component 50 homolog OS=Bos taurus GN=SAMM50 PE=2 SV=1	Sorting and assembly machinery component OS=Anoplophora glabripennis GN=SAM50 PE=4 SV=1	NA	GO:0019867; outer membrane; Cellular Component	IPR000184; Bacterial surface antigen (D15)	K07277
LOCMI00738	0	1.80399	1.12627	0.582638	1.02218	1.71338	2',3'-cyclic-nucleotide 3'-phosphodiesterase	CNP	hypothetical protein BRAFLDRAFT_66963 [Branchiostoma floridae] gb|EEN54584.1| hypothetical protein BRAFLDRAFT_66963 [Branchiostoma floridae]	2',3'-cyclic-nucleotide 3'-phosphodiesterase OS=Bos taurus GN=CNP PE=2 SV=2	Putative uncharacterized protein OS=Branchiostoma floridae GN=BRAFLDRAFT_66963 PE=4 SV=1	NA	NA	IPR027417; P-loop containing nucleoside triphosphate hydrolase	NA
LOCMI00739	0	0	0	0	0	0	LOCMI00739	LOCMI00739	LOCMI00739	LOCMI00739	LOCMI00739	LOCMI00739	LOCMI00739	LOCMI00739	LOCMI00739
LOCMI00740	0.85609	0	0	0	0	0	Circadian clock-controlled protein	to	deviate [Reticulitermes flavipes]	Circadian clock-controlled protein OS=Drosophila yakuba GN=anon-3B1.2 PE=3 SV=1	Deviate OS=Reticulitermes flavipes PE=2 SV=1	NA	NA	IPR010562; Haemolymph juvenile hormone binding	NA
LOCMI00741	0	0	0	0	0	0	LOCMI00741	LOCMI00741	LOCMI00741	LOCMI00741	LOCMI00741	LOCMI00741	LOCMI00741	LOCMI00741	LOCMI00741
LOCMI00743	23.9705	35.4785	23.7769	19.9262	22.4879	20.3463	ELMO domain-containing protein 2	Elmod2	ELMO domain-containing protein 1 [Zootermopsis nevadensis]	ELMO domain-containing protein 2 OS=Mus musculus GN=Elmod2 PE=2 SV=1	Uncharacterized protein OS=Nasonia vitripennis PE=4 SV=1	NA	GO:0005856; cytoskeleton; Cellular Component GO:0006909; phagocytosis; Biological Process	IPR006816; Engulfment/cell motility, ELMO	NA
LOCMI00744	29.5827	30.0665	10.5119	12.9346	17.7177	15.2062	LOCMI00744	LOCMI00744	LOCMI00744	LOCMI00744	LOCMI00744	LOCMI00744	LOCMI00744	LOCMI00744	LOCMI00744
LOCMI00745	90.3651	77.5717	54.812	48.1259	58.6047	47.5462	Neurochondrin homolog	Neurochondrin	Neurochondrin-like protein [Zootermopsis nevadensis]	Neurochondrin homolog OS=Drosophila melanogaster GN=Neurochondrin PE=2 SV=1	Putative uncharacterized protein (Fragment) OS=Solenopsis invicta GN=SINV_07156 PE=4 SV=1	COG1011|Predicted hydrolase (HAD superfamily)|R|General function prediction only ;	GO:0005488; binding; Molecular Function GO:0008152; metabolic process; Biological Process GO:0016787; hydrolase activity; Molecular Function	IPR006439; HAD hydrolase, subfamily IA IPR008709; Neurochondrin IPR011989; Armadillo-like helical IPR016024; Armadillo-type fold IPR023214; HAD-like domain	NA
LOCMI00746	1.61706	0	0	0	0	0	LOCMI00746	LOCMI00746	LOCMI00746	LOCMI00746	LOCMI00746	LOCMI00746	LOCMI00746	LOCMI00746	LOCMI00746
LOCMI00748	0	0.751664	0.625708	1.2818	0	2.35589	carboxylesterase	Ces	carboxylesterase [Locusta migratoria]	NA	Carboxylesterase OS=Locusta migratoria GN=CesA2 PE=2 SV=1	NA	NA	NA	NA
LOCMI00749	5.70727	2.70599	3.50397	4.77763	4.9973	6.1039	Protein of unknown function DUF227 Protein kinase-like domain CHK kinase-like	LOCMI00749	hypothetical protein L798_11579 [Zootermopsis nevadensis]	NA	Uncharacterized protein OS=Rhodnius prolixus PE=4 SV=1	NA	GO:0016772; transferase activity, transferring phosphorus-containing groups; Molecular Function	IPR004119; Protein of unknown function DUF227 IPR011009; Protein kinase-like domain IPR015897; CHK kinase-like	NA
LOCMI00750	122.136	179.948	195.596	71.781	85.1813	73.9965	ATP-binding cassette sub-family B member 7, mitochondrial	Abcb7	hypothetical protein YQE_11366, partial [Dendroctonus ponderosae]	ATP-binding cassette sub-family B member 7, mitochondrial OS=Mus musculus GN=Abcb7 PE=1 SV=3	Uncharacterized protein (Fragment) OS=Dendroctonus ponderosae GN=YQE_11366 PE=3 SV=1	COG5265|ABC-type transport system involved in Fe-S cluster assembly, permease and ATPase components|O|Posttranslational modification, protein turnover, chaperones ;	GO:0000166; nucleotide binding; Molecular Function GO:0005524; ATP binding; Molecular Function GO:0016887; ATPase activity; Molecular Function GO:0017111; nucleoside-triphosphatase activity; Molecular Function	IPR003439; ABC transporter-like IPR003593; AAA+ ATPase domain IPR017871; ABC transporter, conserved site IPR027417; P-loop containing nucleoside triphosphate hydrolase	NA
LOCMI00751	142.967	114.554	194.595	121.189	103.013	96.5916	Catalase	CAT	catalase, partial [Schistocerca gregaria]	Catalase OS=Cavia porcellus GN=CAT PE=2 SV=4	Catalase (Fragment) OS=Schistocerca gregaria PE=2 SV=1	COG0753|Catalase|P|Inorganic ion transport and metabolism ;	GO:0004096; catalase activity; Molecular Function GO:0006979; response to oxidative stress; Biological Process GO:0020037; heme binding; Molecular Function GO:0055114; oxidation-reduction process; Biological Process	IPR002226; Catalase haem-binding site IPR010582; Catalase immune-responsive domain IPR011614; Catalase core domain IPR018028; Catalase, mono-functional, haem-containing IPR020835; Catalase-like domain IPR024708; Catalase active site IPR024711; Catalase, mono-functional, haem-containing, clades 1 and 3	K03781 katE, CAT, catB, srpA; catalase [EC:1.11.1.6] [EC:1.11.1.6] Metabolism; Carbohydrate metabolism; Glyoxylate and dicarboxylate metabolism [PATH:ko00630] Metabolism; Amino acid metabolism; Tryptophan metabolism [PATH:ko00380] Environmental Information Processing; Signal transduction; FoxO signaling pathway [PATH:ko04068] Cellular Processes; Transport and catabolism; Peroxisome [PATH:ko04146]…
LOCMI00752	10.5584	11.8763	8.38449	10.7205	11.1304	14.992	Ubiquitin conjugation factor E4 A	UBE4A	Ubiquitin conjugation factor E4 A [Zootermopsis nevadensis]	Ubiquitin conjugation factor E4 A OS=Bos taurus GN=UBE4A PE=2 SV=1	Uncharacterized protein OS=Acyrthosiphon pisum PE=4 SV=1	NA	GO:0000151; ubiquitin ligase complex; Cellular Component GO:0006511; ubiquitin-dependent protein catabolic process; Biological Process GO:0016567; protein ubiquitination; Biological Process GO:0034450; ubiquitin-ubiquitin ligase activity; Molecular Function	IPR019474; Ubiquitin conjugation factor E4, core	NA
LOCMI00753	0	0	0	0	0	0	Aspartyl/glutamyl-tRNA(Asn/Gln) amidotransferase subunit B	gatB	aspartyl/glutamyl-tRNA amidotransferase subunit B [Candidatus Entotheonella sp. TSY1]	Aspartyl/glutamyl-tRNA(Asn/Gln) amidotransferase subunit B OS=Burkholderia phytofirmans (strain DSM 17436 / PsJN) GN=gatB PE=3 SV=1	Aspartyl/glutamyl-tRNA amidotransferase subunit B OS=Candidatus Entotheonella sp. TSY1 GN=ETSY1_17810 PE=4 SV=1	COG0064|Asp-tRNAAsn/Glu-tRNAGln amidotransferase B subunit (PET112 homolog)|J|Translation, ribosomal structure and biogenesis ;	GO:0016874; ligase activity; Molecular Function GO:0016884; carbon-nitrogen ligase activity, with glutamine as amido-N-donor; Molecular Function	IPR003789; Aspartyl/glutamyl-tRNA amidotransferase subunit B-related IPR006075; Aspartyl/Glutamyl-tRNA(Gln) amidotransferase, subunit B/E, catalytic IPR017959; Aspartyl/glutamyl-tRNA(Asn/Gln) amidotransferase, subunit B /E IPR018027; Asn/Gln amidotransferase	NA
LOCMI00754	0.951212	0.300665	0.75085	1.16528	0.567875	0.428344	Checkpoint protein HUS1	HUS1	Checkpoint protein HUS1 [Zootermopsis nevadensis]	Checkpoint protein HUS1 OS=Homo sapiens GN=HUS1 PE=1 SV=1	Uncharacterized protein OS=Strongylocentrotus purpuratus GN=Sp-Hus1 PE=4 SV=1	NA	GO:0000077; DNA damage checkpoint; Biological Process GO:0005730; nucleolus; Cellular Component GO:0006281; DNA repair; Biological Process GO:0030896; checkpoint clamp complex; Cellular Component	IPR007150; Checkpoint protein Hus1/Mec3 IPR016580; Cell cycle checkpoint, Hus1	K10903
LOCMI00755	0	1.20266	0	0.466111	1.8172	0	LOCMI00755	LOCMI00755	LOCMI00755	LOCMI00755	LOCMI00755	LOCMI00755	LOCMI00755	LOCMI00755	LOCMI00755
LOCMI00757	5.70727	4.05898	0	0	7.15523	3.21258	LOCMI00757	LOCMI00757	LOCMI00757	LOCMI00757	LOCMI00757	LOCMI00757	LOCMI00757	LOCMI00757	LOCMI00757
LOCMI00758	2.66339	1.20266	2.50283	0.932221	6.92808	5.14013	LOCMI00758	LOCMI00758	LOCMI00758	LOCMI00758	LOCMI00758	LOCMI00758	LOCMI00758	LOCMI00758	LOCMI00758
LOCMI00759	25.2071	18.6413	11.1376	18.0618	30.7788	46.6895	nuclear protein	nup	nuclear protein [Schistocerca gregaria]	NA	Nuclear protein OS=Schistocerca gregaria PE=2 SV=1	NA	GO:0005515; protein binding; Molecular Function	IPR003121; SWIB/MDM2 domain	K15223
LOCMI00761	1.90242	3.30732	0.75085	4.07847	1.59005	1.71338	Lateral signaling target protein 2 homolog	zfyve28	PREDICTED: uncharacterized protein LOC100874971 [Megachile rotundata]	Lateral signaling target protein 2 homolog OS=Anopheles gambiae GN=AGAP003678 PE=3 SV=6	Uncharacterized protein OS=Apis mellifera GN=Gb15078 PE=4 SV=1	NA	NA	NA	NA
LOCMI00762	3.42436	7.06564	3.62911	6.64208	7.7231	6.1039	Adenylyltransferase and sulfurtransferase MOCS3	MOCS3	Adenylyltransferase and sulfurtransferase MOCS3 [Zootermopsis nevadensis]	Adenylyltransferase and sulfurtransferase MOCS3 OS=Drosophila willistoni GN=GK18675 PE=3 SV=1	Uncharacterized protein (Fragment) OS=Rhodnius prolixus PE=3 SV=1	COG0607|Rhodanese-related sulfurtransferase|P|Inorganic ion transport and metabolism ;	NA	IPR001763; Rhodanese-like domain	NA
LOCMI00763	0.475606	0	0.625708	0.582638	0.22715	0.321258	PREDICTED: zinc finger protein 62 homolog	ZFP62	PREDICTED: zinc finger protein 62 homolog [Apis mellifera]	NA	Uncharacterized protein OS=Apis mellifera GN=LOC727027 PE=4 SV=1	NA	GO:0005634; nucleus; Cellular Component GO:0008270; zinc ion binding; Molecular Function GO:0046872; metal ion binding; Molecular Function	IPR007087; Zinc finger, C2H2 IPR012934; Zinc finger, AD-type	NA
LOCMI00764	39.0948	57.7278	16.6438	6.7586	21.125	10.3873	LOCMI00764	LOCMI00764	LOCMI00764	LOCMI00764	LOCMI00764	LOCMI00764	LOCMI00764	LOCMI00764	LOCMI00764
LOCMI00766	0	0	0	0.349583	0.340725	0.321258	Coagulation factor XI	F11	PREDICTED: trypsin-1-like [Acyrthosiphon pisum]	Coagulation factor XI OS=Mus musculus GN=F11 PE=2 SV=2	Uncharacterized protein OS=Acyrthosiphon pisum GN=LOC100166724 PE=3 SV=1	NA	GO:0003824; catalytic activity; Molecular Function GO:0004252; serine-type endopeptidase activity; Molecular Function GO:0006508; proteolysis; Biological Process	IPR001254; Peptidase S1 IPR009003; Trypsin-like cysteine/serine peptidase domain IPR018114; Peptidase S1, trypsin family, active site	NA
LOCMI00771	4.18533	9.47096	6.38222	1.04875	3.40725	4.71179	LOCMI00771	LOCMI00771	LOCMI00771	LOCMI00771	LOCMI00771	LOCMI00771	LOCMI00771	LOCMI00771	LOCMI00771
LOCMI00772	0	0	1.62684	0.466111	0	0.428344	Alkyldihydroxyacetonephosphate synthase	Agps	alkylglycerone phosphate synthase [Capsaspora owczarzaki ATCC 30864]	Alkyldihydroxyacetonephosphate synthase OS=Drosophila melanogaster GN=CG10253 PE=2 SV=1	Predicted protein OS=Nematostella vectensis GN=v1g240794 PE=4 SV=1	COG0277|FAD/FMN-containing dehydrogenases|C|Energy production and conversion ;	GO:0003824; catalytic activity; Molecular Function GO:0008609; alkylglycerone-phosphate synthase activity; Molecular Function GO:0008610; lipid biosynthetic process; Biological Process GO:0008762; UDP-N-acetylmuramate dehydrogenase activity; Molecular Function GO:0016491; oxidoreductase activity; Molecular Function GO:0016614; oxidoreductase activity, acting on CH-OH group of donors; Molecular Fu…	IPR006094; FAD linked oxidase, N-terminal IPR016166; FAD-binding, type 2 IPR016167; FAD-binding, type 2, subdomain 1 IPR025650; Alkyldihydroxyacetonephosphate synthase	NA
LOCMI00773	0	0	0	0.466111	0	0	TNF receptor-associated factor 4	TRAF4	TNF receptor-associated factor [Cerapachys biroi]	TNF receptor-associated factor 4 OS=Homo sapiens GN=TRAF4 PE=1 SV=1	Uncharacterized protein OS=Atta cephalotes PE=4 SV=1	NA	GO:0005515; protein binding; Molecular Function	IPR002083; MATH IPR008974; TRAF-like	NA
LOCMI00776	1.14145	12.9286	3.50397	14.2164	25.3272	17.3479	LOCMI00776	LOCMI00776	LOCMI00776	LOCMI00776	LOCMI00776	LOCMI00776	LOCMI00776	LOCMI00776	LOCMI00776
LOCMI00778	0.85609	0	0	0.699166	0	1.28503	LOCMI00778	LOCMI00778	LOCMI00778	LOCMI00778	LOCMI00778	LOCMI00778	LOCMI00778	LOCMI00778	LOCMI00778
LOCMI00780	8.18042	4.35965	13.1399	11.1867	10.4489	5.56847	LOCMI00780	LOCMI00780	LOCMI00780	LOCMI00780	LOCMI00780	LOCMI00780	LOCMI00780	LOCMI00780	LOCMI00780
LOCMI00781	0	0	0	0	0	0	PREDICTED: pyridoxine/pyridoxamine 5'-phosphate oxidase-like	pdxH	PREDICTED: pyridoxine/pyridoxamine 5'-phosphate oxidase-like [Bombus terrestris]	NA	Uncharacterized protein OS=Apis mellifera GN=Ame.2731 PE=4 SV=1	NA	GO:0010181; FMN binding; Molecular Function GO:0016491; oxidoreductase activity; Molecular Function GO:0055114; oxidation-reduction process; Biological Process	IPR012349; FMN-binding split barrel	NA
LOCMI00782	0	0	0	0.466111	0	0.214172	LOCMI00782	LOCMI00782	LOCMI00782	LOCMI00782	LOCMI00782	LOCMI00782	LOCMI00782	LOCMI00782	LOCMI00782
LOCMI00783	1.23658	0	4.5051	0.233055	1.24933	0.963774	LOCMI00783	LOCMI00783	LOCMI00783	LOCMI00783	LOCMI00783	LOCMI00783	LOCMI00783	LOCMI00783	LOCMI00783
LOCMI00784	44.7069	54.2701	56.9394	35.5409	55.9925	111.477	Phosphatidate phosphatase LPIN3	LPIN3	Lipin-3 [Zootermopsis nevadensis]	Phosphatidate phosphatase LPIN3 OS=Homo sapiens GN=LPIN3 PE=1 SV=3	Lipin-2 OS=Harpegnathos saltator GN=EAI_16716 PE=4 SV=1	COG5083|Uncharacterized protein involved in plasmid maintenance|R|General function prediction only ;	NA	IPR007651; Lipin, N-terminal	K15728 LPIN; phosphatidate phosphatase LPIN [EC:3.1.3.4] [EC:3.1.3.4] Metabolism; Lipid metabolism; Glycerolipid metabolism [PATH:ko00561] Metabolism; Lipid metabolism; Glycerophospholipid metabolism [PATH:ko00564]
LOCMI00785	1.52194	0.300665	0.75085	0.932221	1.70363	1.71338	Zinc finger protein 687	ZNF687	hypothetical protein L798_14213 [Zootermopsis nevadensis]	Zinc finger protein 687 OS=Homo sapiens GN=ZNF687 PE=1 SV=1	Putative uncharacterized protein OS=Tribolium castaneum GN=TcasGA2_TC000404 PE=4 SV=1	NA	GO:0003676; nucleic acid binding; Molecular Function GO:0046872; metal ion binding; Molecular Function	IPR007087; Zinc finger, C2H2 IPR013087; Zinc finger C2H2-type/integrase DNA-binding domain IPR015880; Zinc finger, C2H2-like	NA
LOCMI00786	93.1236	168.824	195.721	71.6645	82.6827	76.3524	LOCMI00786	LOCMI00786	LOCMI00786	LOCMI00786	LOCMI00786	LOCMI00786	LOCMI00786	LOCMI00786	LOCMI00786
LOCMI00787	1.14145	0.601331	0.500566	1.63139	0.4543	0.749602	SET domain-containing protein 4	SETD4	hypothetical protein SINV_12919 [Solenopsis invicta]	SET domain-containing protein 4 OS=Homo sapiens GN=SETD4 PE=2 SV=1	Putative uncharacterized protein (Fragment) OS=Solenopsis invicta GN=SINV_12919 PE=4 SV=1	NA	GO:0005515; protein binding; Molecular Function	IPR001214; SET domain	NA
LOCMI00788	137.07	162.359	139.908	87.3957	88.3614	86.6326	Proteasome subunit beta type-4 (Fragment)	psmb4	PREDICTED: proteasome subunit beta type-4 [Tribolium castaneum] gb|EFA05833.1| hypothetical protein TcasGA2_TC008617 [Tribolium castaneum]	Proteasome subunit beta type-4 (Fragment) OS=Xenopus laevis GN=psmb4 PE=2 SV=2	Proteasome subunit beta type OS=Tribolium castaneum GN=TcasGA2_TC008617 PE=3 SV=1	COG0638|20S proteasome, alpha and beta subunits|O|Posttranslational modification, protein turnover, chaperones ;	GO:0004298; threonine-type endopeptidase activity; Molecular Function GO:0005839; proteasome core complex; Cellular Component GO:0051603; proteolysis involved in cellular protein catabolic process; Biological Process	IPR001353; Proteasome, subunit alpha/beta	K02736 PSMB4; 20S proteasome subunit beta 7 [EC:3.4.25.1] [EC:3.4.25.1] Genetic Information Processing; Folding, sorting and degradation; Proteasome [PATH:ko03050]
LOCMI00789	6.08775	7.06564	6.38222	5.12722	4.77015	5.03304	Protein SMG8	CPIJ003128	Protein SMG8 [Zootermopsis nevadensis]	Protein SMG8 OS=Culex quinquefasciatus GN=CPIJ003128 PE=3 SV=1	Uncharacterized protein OS=Apis mellifera GN=LOC726359 PE=4 SV=1	NA	NA	IPR019354; Smg8/Smg9	K18734
LOCMI00792	13.0316	22.2492	16.769	22.6064	20.3299	22.2739	Microtubule-associated protein 4	Map4	Microtubule-associated protein 2 [Camponotus floridanus]	Microtubule-associated protein 4 OS=Rattus norvegicus GN=Map4 PE=1 SV=1	Microtubule-associated protein OS=Camponotus floridanus GN=EAG_10904 PE=3 SV=1	NA	GO:0008017; microtubule binding; Molecular Function GO:0015631; tubulin binding; Molecular Function	IPR001084; Microtubule associated protein, tubulin-binding repeat IPR027324; Microtubule associated protein MAP2/MAP4/Tau	K04380 MAPT, TAU; microtubule-associated protein tau K04380 Environmental Information Processing; Signal transduction; MAPK signaling pathway [PATH:ko04010] Human Diseases; Neurodegenerative diseases; Alzheimer's disease [PATH:ko05010]
LOCMI00793	0	0	0.625708	0.116528	0	0	E3 ubiquitin-protein ligase UPL6	UPL6	ubiquitin protein ligase [Anopheles darlingi]	E3 ubiquitin-protein ligase UPL6 OS=Arabidopsis thaliana GN=UPL6 PE=2 SV=1	Ubiquitin protein ligase OS=Anopheles darlingi GN=AND_001547 PE=4 SV=1	COG5021|Ubiquitin-protein ligase|O|Posttranslational modification, protein turnover, chaperones ;	GO:0004842; ubiquitin-protein transferase activity; Molecular Function	IPR000569; HECT	NA
LOCMI00795	2.28291	0	0	1.39833	0.4543	0	LOCMI00795	LOCMI00795	LOCMI00795	LOCMI00795	LOCMI00795	LOCMI00795	LOCMI00795	LOCMI00795	LOCMI00795
LOCMI00796	0	0	381.932	4800.24	481.899	53.1147	Endoglucanase B	cenB	beta-1,4-endoglucanase [Mastotermes darwiniensis]	Endoglucanase B OS=Cellulomonas fimi GN=cenB PE=3 SV=1	Beta-1,4-endoglucanase (Precursor) OS=Mastotermes darwiniensis GN=cel4 PE=2 SV=1	NA	GO:0003824; catalytic activity; Molecular Function GO:0004553; hydrolase activity, hydrolyzing O-glycosyl compounds; Molecular Function GO:0005975; carbohydrate metabolic process; Biological Process	IPR001701; Glycoside hydrolase, family 9 IPR008928; Six-hairpin glycosidase-like IPR012341; Six-hairpin glycosidase	NA
LOCMI00797	31.8656	45.5508	46.5527	53.4862	31.1196	35.8738	WW domain-binding protein 2	WBP2	WW domain-binding protein 2 [Zootermopsis nevadensis]	WW domain-binding protein 2 OS=Homo sapiens GN=WBP2 PE=1 SV=1	Uncharacterized protein OS=Nasonia vitripennis PE=4 SV=1	NA	NA	IPR004182; GRAM domain IPR011993; Pleckstrin homology-like domain IPR018826; WW-domain-binding protein	NA
LOCMI00798	0.570727	0.450998	0	0.699166	0.340725	0	LOCMI00798	LOCMI00798	LOCMI00798	LOCMI00798	LOCMI00798	LOCMI00798	LOCMI00798	LOCMI00798	LOCMI00798
LOCMI00799	0	1.05233	0.500566	0.815694	0.68145	0.428344	LOCMI00799	LOCMI00799	LOCMI00799	LOCMI00799	LOCMI00799	LOCMI00799	LOCMI00799	LOCMI00799	LOCMI00799
LOCMI00800	1.42682	0	1.25142	1.51486	0	0.856688	ATPase family AAA domain-containing protein 2B	ATAD2B	ATPase family AAA domain-containing protein 2B [Zootermopsis nevadensis]	NA	NA	NA	NA	NA	NA
LOCMI00801	3.70973	4.81065	7.25821	24.9369	51.1088	20.4534	Putative uncharacterized protein	LOCMI00801	conserved hypothetical protein [Pediculus humanus corporis] gb|EEB15989.1| conserved hypothetical protein [Pediculus humanus corporis]	NA	Putative uncharacterized protein OS=Pediculus humanus subsp. corporis GN=Phum_PHUM398640 PE=4 SV=1	NA	GO:0005515; protein binding; Molecular Function	IPR007110; Immunoglobulin-like domain IPR013783; Immunoglobulin-like fold	NA
LOCMI00802	0.380485	0	0	0	0	0	MADF domain	LOCMI00802	PREDICTED: uncharacterized protein LOC100572795 [Acyrthosiphon pisum]	NA	Uncharacterized protein OS=Acyrthosiphon pisum PE=4 SV=1	NA	NA	IPR006578; MADF domain	NA
LOCMI00803	0	0	153.924	299.01	339.703	256.792	LOCMI00803	LOCMI00803	LOCMI00803	LOCMI00803	LOCMI00803	LOCMI00803	LOCMI00803	LOCMI00803	LOCMI00803
LOCMI00804	29.2022	11.8763	23.0261	13.2842	10.9032	9.42357	Putative uncharacterized protein (Fragment)	LOCMI00804	hypothetical protein L798_15216 [Zootermopsis nevadensis]	NA	Putative uncharacterized protein (Fragment) OS=Solenopsis invicta GN=SINV_14368 PE=4 SV=1	NA	GO:0016021; integral component of membrane; Cellular Component	IPR012926; TMPIT-like	NA
LOCMI00806	1.90242	1.35299	0.875991	1.86444	0.4543	1.39212	Fat-like cadherin-related tumor suppressor homolog	kug	hypothetical protein L798_02823, partial [Zootermopsis nevadensis]	Fat-like cadherin-related tumor suppressor homolog OS=Drosophila melanogaster GN=kug PE=2 SV=2	Uncharacterized protein OS=Atta cephalotes PE=4 SV=1	NA	GO:0005509; calcium ion binding; Molecular Function GO:0005886; plasma membrane; Cellular Component GO:0007155; cell adhesion; Biological Process GO:0007156; homophilic cell adhesion; Biological Process GO:0016020; membrane; Cellular Component	IPR002126; Cadherin IPR015919; Cadherin-like IPR020894; Cadherin conserved site	NA
LOCMI00807	11.3194	8.2683	11.3879	9.55527	10.9032	6.85351	Mediator of RNA polymerase II transcription subunit 18	MED18	Mediator of RNA polymerase II transcription subunit 18 [Zootermopsis nevadensis]	Mediator of RNA polymerase II transcription subunit 18 OS=Anopheles gambiae GN=MED18 PE=3 SV=3	Putative uncharacterized protein OS=Pediculus humanus subsp. corporis GN=Phum_PHUM210840 PE=4 SV=1	NA	GO:0001104; RNA polymerase II transcription cofactor activity; Molecular Function GO:0006357; regulation of transcription from RNA polymerase II promoter; Biological Process GO:0016592; mediator complex; Cellular Component	IPR019095; Mediator complex, subunit Med18, metazoa/fungi	K15135
LOCMI00808	1.99754	0.450998	2.62797	2.44708	1.47648	1.71338	PREDICTED: nucleolar complex protein 4 homolog B	LOCMI00808	PREDICTED: nucleolar complex protein 4 homolog B [Nasonia vitripennis]	NA	Uncharacterized protein OS=Nasonia vitripennis PE=4 SV=1	NA	NA	NA	NA
LOCMI00809	0.475606	0	0	0	0	0	LOCMI00809	LOCMI00809	LOCMI00809	LOCMI00809	LOCMI00809	LOCMI00809	LOCMI00809	LOCMI00809	LOCMI00809
LOCMI00811	18.834	13.8306	10.5119	5.70985	12.4933	8.56688	Polysaccharide deacetylase Glycoside hydrolase/deacetylase, beta/alpha-barrel	LOCMI00811	PREDICTED: uncharacterized protein LOC100160648 [Acyrthosiphon pisum]	NA	Uncharacterized protein OS=Acyrthosiphon pisum GN=LOC100160648 PE=4 SV=1	NA	GO:0003824; catalytic activity; Molecular Function GO:0005975; carbohydrate metabolic process; Biological Process GO:0016810; hydrolase activity, acting on carbon-nitrogen (but not peptide) bonds; Molecular Function	IPR002509; Polysaccharide deacetylase IPR011330; Glycoside hydrolase/deacetylase, beta/alpha-barrel	NA
LOCMI00812	4.09021	3.60799	3.62911	2.79666	4.88373	3.53384	LOCMI00812	LOCMI00812	LOCMI00812	LOCMI00812	LOCMI00812	LOCMI00812	LOCMI00812	LOCMI00812	LOCMI00812
LOCMI00813	0	0	0.375425	0	0	0	Phosphoglycolate phosphatase 2	PGLP2	4nitrophenylphosphatase-like protein [Acanthamoeba castellanii str. Neff] gb|ELR10871.1| 4nitrophenylphosphatase-like protein [Acanthamoeba castellanii str. Neff]	Phosphoglycolate phosphatase 2 OS=Arabidopsis thaliana GN=PGLP2 PE=1 SV=1	4nitrophenylphosphatase-like protein OS=Acanthamoeba castellanii str. Neff GN=ACA1_181240 PE=4 SV=1	COG0647|Predicted sugar phosphatases of the HAD superfamily|G|Carbohydrate transport and metabolism ;	NA	IPR023214; HAD-like domain IPR023215; Nitrophenylphosphatase-like domain	NA
LOCMI00814	24.2559	23.4519	29.4083	17.9453	29.7567	57.184	Phosphatidate phosphatase LPIN1	Lpin1	Lipin-3 [Zootermopsis nevadensis]	Phosphatidate phosphatase LPIN1 OS=Mus musculus GN=Lpin1 PE=1 SV=1	Lipin-2 OS=Harpegnathos saltator GN=EAI_16716 PE=4 SV=1	NA	NA	NA	K15728 LPIN; phosphatidate phosphatase LPIN [EC:3.1.3.4] [EC:3.1.3.4] Metabolism; Lipid metabolism; Glycerolipid metabolism [PATH:ko00561] Metabolism; Lipid metabolism; Glycerophospholipid metabolism [PATH:ko00564]
LOCMI00815	0.475606	0.300665	0	0	0.22715	0	Endonuclease III-like protein 1	NTHL1	Endonuclease III-like protein 1 [Zootermopsis nevadensis]	Endonuclease III-like protein 1 OS=Bos taurus GN=NTHL1 PE=2 SV=1	Uncharacterized protein (Fragment) OS=Pelodiscus sinensis GN=NTHL1 PE=4 SV=1	COG0177|Predicted EndoIII-related endonuclease|L|Replication, recombination and repair ;	GO:0003824; catalytic activity; Molecular Function GO:0006281; DNA repair; Biological Process	IPR011257; DNA glycosylase	NA
LOCMI00816	0.951212	0.450998	2.12741	0.349583	1.13575	0.321258	Nuclear pore complex protein Nup155	NUP155	nuclear pore complex protein nup154, putative [Pediculus humanus corporis] gb|EEB15317.1| nuclear pore complex protein nup154, putative [Pediculus humanus corporis]	Nuclear pore complex protein Nup155 OS=Homo sapiens GN=NUP155 PE=1 SV=1	Nuclear pore complex protein nup154, putative OS=Pediculus humanus subsp. corporis GN=Phum_PHUM361380 PE=4 SV=1	NA	GO:0005643; nuclear pore; Cellular Component GO:0006913; nucleocytoplasmic transport; Biological Process GO:0017056; structural constituent of nuclear pore; Molecular Function	IPR004870; Nucleoporin, Nup155-like IPR007187; Nucleoporin, Nup133/Nup155-like, C-terminal	NA
LOCMI00817	69.7238	856.145	213.241	124.452	87.2257	47.332	Putative uncharacterized protein	LOCMI00817	hypothetical protein EAG_03557 [Camponotus floridanus]	NA	Putative uncharacterized protein OS=Camponotus floridanus GN=EAG_03557 PE=4 SV=1	NA	NA	NA	NA
LOCMI00818	0.285363	0	0.375425	0	0	0	LOCMI00818	LOCMI00818	LOCMI00818	LOCMI00818	LOCMI00818	LOCMI00818	LOCMI00818	LOCMI00818	LOCMI00818
LOCMI00819	0	0	0	0	0	0	hexamerin-like protein 1	HexL1	hexamerin-like protein 1 [Locusta migratoria]	Allergen Cr-PI OS=Periplaneta americana PE=1 SV=1	Hexamerin-like protein 1 OS=Locusta migratoria PE=2 SV=1	NA	NA	IPR000896; Hemocyanin/hexamerin middle domain IPR008922; Uncharacterised domain, di-copper centre	NA
LOCMI00820	0	0	0	0	0.22715	0	PREDICTED: embryonic pepsinogen-like	LOCMI00820	PREDICTED: embryonic pepsinogen-like [Anolis carolinensis]	Embryonic pepsinogen OS=Gallus gallus PE=2 SV=1	Uncharacterized protein OS=Anolis carolinensis GN=LOC100555068 PE=3 SV=2	NA	GO:0004190; aspartic-type endopeptidase activity; Molecular Function GO:0006508; proteolysis; Biological Process	IPR001461; Aspartic peptidase IPR021109; Aspartic peptidase domain	NA
LOCMI00821	8.37066	8.11797	2.25255	9.55527	10.3353	9.10231	NA	LOCMI00821	hypothetical protein L798_15692 [Zootermopsis nevadensis]	NA	NA	NA	NA	NA	NA
LOCMI00822	0	0	0	0	0	0	LOCMI00822	LOCMI00822	LOCMI00822	LOCMI00822	LOCMI00822	LOCMI00822	LOCMI00822	LOCMI00822	LOCMI00822
LOCMI00823	2.37803	2.25499	2.12741	4.42805	2.61223	3.1055	LOCMI00823	LOCMI00823	LOCMI00823	LOCMI00823	LOCMI00823	LOCMI00823	LOCMI00823	LOCMI00823	LOCMI00823
LOCMI00824	0.665848	0.601331	0.125142	0.349583	1.59005	0.321258	LOCMI00824	LOCMI00824	LOCMI00824	LOCMI00824	LOCMI00824	LOCMI00824	LOCMI00824	LOCMI00824	LOCMI00824
LOCMI00825	1.90242	2.55566	6.25708	3.3793	2.7258	3.1055	PAX3- and PAX7-binding protein 1	PAXBP1	hypothetical protein YQE_03981, partial [Dendroctonus ponderosae]	PAX3- and PAX7-binding protein 1 OS=Homo sapiens GN=PAXBP1 PE=1 SV=2	Uncharacterized protein OS=Nasonia vitripennis PE=4 SV=1	NA	GO:0003677; DNA binding; Molecular Function GO:0003700; sequence-specific DNA binding transcription factor activity; Molecular Function GO:0005634; nucleus; Cellular Component GO:0006355; regulation of transcription, DNA-templated; Biological Process	IPR012890; GC-rich sequence DNA-binding factor	NA
LOCMI00826	3.99509	5.11131	1.62684	4.42805	3.86155	5.3543	Major facilitator superfamily domain-containing protein 10	MFSD10	Major facilitator superfamily domain-containing protein 10 [Zootermopsis nevadensis]	Major facilitator superfamily domain-containing protein 10 OS=Homo sapiens GN=MFSD10 PE=2 SV=1	Tetracycline-efflux transporter, putative OS=Pediculus humanus subsp. corporis GN=Phum_PHUM360440 PE=4 SV=1	NA	GO:0016021; integral component of membrane; Cellular Component GO:0055085; transmembrane transport; Biological Process	IPR011701; Major facilitator superfamily IPR016196; Major facilitator superfamily domain, general substrate transporter	NA
LOCMI00827	8.94139	7.8173	6.50736	8.27346	8.74528	11.244	Probable ATP-dependent RNA helicase pitchoune	pit	PREDICTED: probable ATP-dependent RNA helicase pitchoune-like [Megachile rotundata]	Probable ATP-dependent RNA helicase pitchoune OS=Drosophila melanogaster GN=pit PE=2 SV=2	Putative uncharacterized protein OS=Tribolium castaneum GN=TcasGA2_TC000825 PE=4 SV=1	COG0513|Superfamily II DNA and RNA helicases|LKJ|Replication, recombination and repair ; Transcription ; Translation, ribosomal structure and biogenesis ;	GO:0003676; nucleic acid binding; Molecular Function GO:0004386; helicase activity; Molecular Function GO:0005524; ATP binding; Molecular Function GO:0008026; ATP-dependent helicase activity; Molecular Function	IPR000629; RNA helicase, ATP-dependent, DEAD-box, conserved site IPR001650; Helicase, C-terminal IPR011545; DNA/RNA helicase, DEAD/DEAH box type, N-terminal IPR014001; Helicase, superfamily 1/2, ATP-binding domain IPR014014; RNA helicase, DEAD-box type, Q motif IPR025313; Domain of unknown function DUF4217 IPR027417; P-loop containing nucleoside triphosphate hydrolase	K13179
LOCMI00828	211.93	277.063	254.538	189.008	186.831	186.33	RING finger protein 10	RNF10	PREDICTED: RING finger protein 10 [Nasonia vitripennis] ref|XP_008209813.1| PREDICTED: RING finger protein 10 [Nasonia vitripennis] ref|XP_008209814.1| PREDICTED: RING finger protein 10 [Nasonia vitripennis]	RING finger protein 10 OS=Homo sapiens GN=RNF10 PE=1 SV=2	Uncharacterized protein OS=Nasonia vitripennis PE=4 SV=1	NA	NA	NA	NA
LOCMI00829	0.285363	0.901996	2.75312	3.26277	4.31585	3.31967	LOCMI00829	LOCMI00829	LOCMI00829	LOCMI00829	LOCMI00829	LOCMI00829	LOCMI00829	LOCMI00829	LOCMI00829
LOCMI00831	0.570727	0.450998	0.625708	0.932221	0.795025	0.642516	CD109 antigen	CD109	conserved hypothetical protein [Pediculus humanus corporis] gb|EEB14277.1| conserved hypothetical protein [Pediculus humanus corporis]	CD109 antigen OS=Homo sapiens GN=CD109 PE=1 SV=2	Putative uncharacterized protein OS=Pediculus humanus subsp. corporis GN=Phum_PHUM289860 PE=4 SV=1	NA	GO:0005615; extracellular space; Cellular Component	IPR008930; Terpenoid cyclases/protein prenyltransferase alpha-alpha toroid IPR011626; Alpha-macroglobulin complement component	NA
LOCMI00832	0.380485	0	0	0	0.22715	0.428344	RING finger protein 145	rnf145	PREDICTED: RING finger protein 145-like [Aplysia californica]	RING finger protein 145 OS=Xenopus laevis GN=rnf145 PE=2 SV=1	LOC100127651 protein OS=Xenopus tropicalis GN=LOC100127651 PE=2 SV=1	NA	GO:0005515; protein binding; Molecular Function GO:0008270; zinc ion binding; Molecular Function	IPR001841; Zinc finger, RING-type IPR013083; Zinc finger, RING/FYVE/PHD-type	NA
LOCMI00835	5.99263	5.56231	5.38109	7.10819	6.13305	5.88973	DNA excision repair protein ERCC-8	Ercc8	DNA excision repair protein ERCC-8 [Zootermopsis nevadensis]	DNA excision repair protein ERCC-8 OS=Mus musculus GN=Ercc8 PE=2 SV=2	Putative uncharacterized protein OS=Daphnia pulex GN=DAPPUDRAFT_300153 PE=4 SV=1	COG2319|FOG: WD40 repeat|R|General function prediction only ;	GO:0005515; protein binding; Molecular Function	IPR001680; WD40 repeat IPR015943; WD40/YVTN repeat-like-containing domain IPR017986; WD40-repeat-containing domain IPR019775; WD40 repeat, conserved site IPR020472; G-protein beta WD-40 repeat	K10570 ERCC8, CKN1, CSA; DNA excision repair protein ERCC-8 K10570 Genetic Information Processing; Folding, sorting and degradation; SNAREs [BR:ko04131] Genetic Information Processing; Folding, sorting and degradation; Ubiquitin mediated proteolysis [PATH:ko04120] Genetic Information Processing; Replication and repair; Nucleotide excision repair [PATH:ko03420]
LOCMI00837	0	0	0	0	0	0	Iron-sulfur protein NUBPL	nubpl	iron-sulfur nubpl-like protein [Medicago truncatula]	Iron-sulfur protein NUBPL OS=Dictyostelium discoideum GN=nubpl PE=3 SV=1	Uncharacterized protein OS=Glycine max PE=4 SV=1	COG0489|ATPases involved in chromosome partitioning|D|Cell cycle control, cell division, chromosome partitioning ;	GO:0005524; ATP binding; Molecular Function	IPR000808; Mrp, conserved site IPR019591; ATPase-like, ParA/MinD IPR027417; P-loop containing nucleoside triphosphate hydrolase	K03593
LOCMI00838	1.61706	0.901996	0.875991	6.29249	0.113575	3.53384	Glucose dehydrogenase [FAD, quinone]	Gld	PREDICTED: glucose dehydrogenase [FAD, quinone] [Tribolium castaneum] gb|EFA07378.1| hypothetical protein TcasGA2_TC016355 [Tribolium castaneum]	Glucose dehydrogenase [FAD, quinone] OS=Drosophila pseudoobscura pseudoobscura GN=Gld PE=3 SV=4	Putative uncharacterized protein OS=Tribolium castaneum GN=TcasGA2_TC016355 PE=3 SV=1	COG2303|Choline dehydrogenase and related flavoproteins|E|Amino acid transport and metabolism ;	GO:0016614; oxidoreductase activity, acting on CH-OH group of donors; Molecular Function GO:0055114; oxidation-reduction process; Biological Process	IPR007867; Glucose-methanol-choline oxidoreductase, C-terminal	NA
LOCMI00842	25.3973	19.0923	16.5187	25.2865	30.3245	20.6676	Ribosome biogenesis regulatory protein homolog	Rrs1	Ribosome biogenesis regulatory protein-like protein [Zootermopsis nevadensis]	Ribosome biogenesis regulatory protein homolog OS=Mus musculus GN=Rrs1 PE=1 SV=1	Putative regulator of ribosome biosynthesis OS=Danaus plexippus GN=KGM_04576 PE=4 SV=1	NA	GO:0005634; nucleus; Cellular Component GO:0042254; ribosome biogenesis; Biological Process	IPR007023; Ribosomal biogenesis regulatory protein	K14852
LOCMI00844	2.56827	2.85632	5.75651	5.12722	3.40725	1.17795	Phosphatidylinositol-glycan biosynthesis class X protein	PIGX	Phosphatidylinositol-glycan biosynthesis class X protein [Zootermopsis nevadensis]	NA	NA	NA	NA	NA	NA
LOCMI00846	0	0.450998	0	0	0	0	NA	LOCMI00846	hypothetical protein L798_00941 [Zootermopsis nevadensis]	NA	NA	NA	NA	NA	NA
LOCMI00849	24.8266	27.6612	21.1489	21.9072	12.6068	16.5983	PREDICTED: putative peptidyl-tRNA hydrolase PTRHD1-like	PTRHD1	PREDICTED: putative peptidyl-tRNA hydrolase PTRHD1-like [Aplysia californica]	NA	Putative peptidyl-trna hydrolase OS=Rhodnius prolixus PE=2 SV=1	NA	GO:0004725; protein tyrosine phosphatase activity; Molecular Function GO:0006470; protein dephosphorylation; Biological Process	IPR017867; Protein-tyrosine phosphatase, low molecular weight IPR023476; Peptidyl-tRNA hydrolase II domain	NA
LOCMI00850	4.28045	7.96763	8.00906	7.34124	7.04165	6.85351	Coiled-coil domain-containing protein 85C	ccdc85c	Coiled-coil domain-containing protein 85C [Zootermopsis nevadensis]	Coiled-coil domain-containing protein 85C OS=Xenopus tropicalis GN=ccdc85c PE=2 SV=1	Putative uncharacterized protein GLEAN_07625 OS=Tribolium castaneum GN=GLEAN_07625 PE=4 SV=1	NA	NA	IPR019359; Protein of unknown function DUF2216, coiled-coil	NA
LOCMI00851	0.285363	0	0.375425	0	0	0	Sodium-dependent phosphate transport protein 3	Slc17a2	PREDICTED: sodium-dependent phosphate transport protein 3-like [Jaculus jaculus]	Sodium-dependent phosphate transport protein 3 OS=Mus musculus GN=Slc17a2 PE=2 SV=1	Sialin OS=Harpegnathos saltator GN=EAI_13059 PE=4 SV=1	NA	NA	IPR016196; Major facilitator superfamily domain, general substrate transporter	NA
LOCMI00852	0.570727	0	2.25255	5.4768	1.3629	4.06927	LOCMI00852	LOCMI00852	LOCMI00852	LOCMI00852	LOCMI00852	LOCMI00852	LOCMI00852	LOCMI00852	LOCMI00852
LOCMI00854	204.606	122.972	179.954	98.5824	103.353	84.2767	NA	CP	RecName: Full=Endocuticle structural glycoprotein ABD-5	Endocuticle structural glycoprotein ABD-5 OS=Locusta migratoria PE=1 SV=1	NA	NA	NA	NA	NA
LOCMI00857	35.1948	47.6555	46.6778	44.6301	39.4105	39.9431	Sodium-coupled monocarboxylate transporter 2	SLC5A12	Sodium-coupled monocarboxylate transporter 2 [Harpegnathos saltator]	Sodium-coupled monocarboxylate transporter 2 OS=Homo sapiens GN=SLC5A12 PE=2 SV=2	Sodium-coupled monocarboxylate transporter 2 OS=Harpegnathos saltator GN=EAI_15166 PE=3 SV=1	COG0591|Na+/proline symporter|ER|Amino acid transport and metabolism ; General function prediction only ;	GO:0005215; transporter activity; Molecular Function GO:0006810; transport; Biological Process GO:0016020; membrane; Cellular Component GO:0055085; transmembrane transport; Biological Process	IPR001734; Sodium/solute symporter	NA
LOCMI00858	50.5093	60.7344	78.3386	75.743	52.926	55.1493	Selenoprotein S	VIMP	Selenoprotein S [Zootermopsis nevadensis]	NA	Uncharacterized protein OS=Danaus plexippus GN=KGM_17667 PE=4 SV=1	NA	GO:0006886; intracellular protein transport; Biological Process GO:0008430; selenium binding; Molecular Function GO:0030176; integral component of endoplasmic reticulum membrane; Cellular Component	IPR009703; Selenoprotein S	NA
LOCMI00859	0	0	0	0.116528	0	0	Probable UDP-N-acetylglucosamine pyrophosphorylase	uap1	UDP-N-acetylglucosamine pyrophosphorylase [Polysphondylium pallidum PN500]	Probable UDP-N-acetylglucosamine pyrophosphorylase OS=Dictyostelium discoideum GN=uap1 PE=3 SV=1	UDP-N-acetylglucosamine pyrophosphorylase OS=Polysphondylium pallidum GN=uap1 PE=4 SV=1	COG4284|UDP-glucose pyrophosphorylase|G|Carbohydrate transport and metabolism ;	GO:0008152; metabolic process; Biological Process GO:0016779; nucleotidyltransferase activity; Molecular Function	IPR002618; UTP--glucose-1-phosphate uridylyltransferase	NA
LOCMI00860	16.1706	12.4776	11.2627	5.01069	3.74798	9.10231	Aminopeptidase N	APN1	GH18429 [Drosophila grimshawi] gb|EDV93148.1| GH18429 [Drosophila grimshawi]	Aminopeptidase N OS=Plutella xylostella GN=APN1 PE=1 SV=1	GH18429 OS=Drosophila grimshawi GN=Dgri\GH18429 PE=4 SV=1	NA	GO:0006508; proteolysis; Biological Process	IPR001930; Peptidase M1, alanine aminopeptidase/leukotriene A4 hydrolase	NA
LOCMI00861	0.190242	0.150333	0	0	0.340725	0.214172	Inter-alpha-trypsin inhibitor heavy chain H4	ITIH4	Inter-alpha-trypsin inhibitor heavy chain H3 [Zootermopsis nevadensis]	Inter-alpha-trypsin inhibitor heavy chain H4 OS=Homo sapiens GN=ITIH4 PE=1 SV=4	Putative uncharacterized protein OS=Tribolium castaneum GN=TcasGA2_TC014157 PE=4 SV=1	NA	NA	IPR002035; von Willebrand factor, type A	NA
LOCMI00862	2.37803	0.601331	2.87826	11.0701	2.2715	4.81887	Putative polypeptide N-acetylgalactosaminyltransferase 9	pgant9	Putative polypeptide N-acetylgalactosaminyltransferase 9 [Zootermopsis nevadensis]	Putative polypeptide N-acetylgalactosaminyltransferase 9 OS=Drosophila melanogaster GN=pgant9 PE=2 SV=2	Uncharacterized protein OS=Apis mellifera PE=3 SV=1	NA	NA	IPR027791; Galactosyltransferase, C-terminal domain	NA
LOCMI00863	38.2387	28.5632	27.406	27.5005	22.9422	12.5291	5-hydroxyisourate hydrolase	Urah	5-hydroxyisourate hydrolase [Zootermopsis nevadensis]	5-hydroxyisourate hydrolase OS=Mus musculus GN=Urah PE=1 SV=1	5-hydroxyisourate hydrolase OS=Tribolium castaneum GN=TcasGA2_TC002488 PE=3 SV=1	COG2351|Transthyretin-like protein|R|General function prediction only ;	NA	IPR000895; Transthyretin/hydroxyisourate hydrolase IPR023416; Transthyretin/hydroxyisourate hydrolase, superfamily IPR023418; Transthyretin, thyroxine binding site	K07127 uraH, pucM, hiuH; 5-hydroxyisourate hydrolase [EC:3.5.2.17] [EC:3.5.2.17] Metabolism; Nucleotide metabolism; Purine metabolism [PATH:ko00230]
LOCMI00864	7.70481	7.3663	5.63137	10.0214	11.9254	11.3511	LOCMI00864	LOCMI00864	LOCMI00864	LOCMI00864	LOCMI00864	LOCMI00864	LOCMI00864	LOCMI00864	LOCMI00864
LOCMI00865	1.99754	0.751664	2.25255	0.349583	1.13575	0	Xanthine dehydrogenase	xdh	PREDICTED: probable aldehyde oxidase 2-like [Megachile rotundata]	Xanthine dehydrogenase OS=Dictyostelium discoideum GN=xdh PE=3 SV=1	Uncharacterized protein (Fragment) OS=Rhodnius prolixus PE=4 SV=1	COG4631|Xanthine dehydrogenase, molybdopterin-binding subunit B|F|Nucleotide transport and metabolism ;	GO:0016491; oxidoreductase activity; Molecular Function GO:0055114; oxidation-reduction process; Biological Process	IPR008274; Aldehyde oxidase/xanthine dehydrogenase, molybdopterin binding	NA
LOCMI00866	0.285363	0	0.625708	0	0	0.53543	Probable phospholipid-transporting ATPase IF (Fragment)	ATP11B	Putative phospholipid-transporting ATPase IF [Acromyrmex echinatior]	Probable phospholipid-transporting ATPase IF (Fragment) OS=Oryctolagus cuniculus GN=ATP11B PE=1 SV=2	Putative phospholipid-transporting ATPase IF (Fragment) OS=Acromyrmex echinatior GN=G5I_00755 PE=4 SV=1	COG0474|Cation transport ATPase|P|Inorganic ion transport and metabolism ;	GO:0000287; magnesium ion binding; Molecular Function GO:0004012; phospholipid-translocating ATPase activity; Molecular Function GO:0005524; ATP binding; Molecular Function GO:0015914; phospholipid transport; Biological Process GO:0016021; integral component of membrane; Cellular Component	IPR006539; Cation-transporting P-type ATPase, subfamily IV	NA
LOCMI00867	0.285363	0.450998	1.75198	0.815694	0.340725	0.749602	LOCMI00867	LOCMI00867	LOCMI00867	LOCMI00867	LOCMI00867	LOCMI00867	LOCMI00867	LOCMI00867	LOCMI00867
LOCMI00868	2.85363	145.071	40.7962	19.3436	18.967	5.78265	Putative uncharacterized protein	LOCMI00868	hypothetical protein EAG_03557 [Camponotus floridanus]	NA	Putative uncharacterized protein OS=Camponotus floridanus GN=EAG_03557 PE=4 SV=1	NA	NA	NA	NA
LOCMI00869	0	0	0	0	0.22715	0	Disks large-associated protein 5	DLGAP5	PREDICTED: disks large-associated protein 5 isoform X1 [Poecilia formosa]	Disks large-associated protein 5 OS=Homo sapiens GN=DLGAP5 PE=1 SV=2	Putative guanylate-kinase-associated protein OS=Ixodes ricinus PE=2 SV=1	NA	GO:0007267; cell-cell signaling; Biological Process	IPR005026; Guanylate-kinase-associated protein	K16804
LOCMI00870	0	0.300665	0	0	0	0.428344	A kinase anchor protein 10, mitochondrial	AKAP10	A kinase anchor protein 10, mitochondrial [Zootermopsis nevadensis]	NA	Kinase anchor protein 10 OS=Pararge aegeria PE=4 SV=1	NA	NA	NA	NA
LOCMI00871	1.71218	2.40532	2.00227	1.2818	2.83938	1.92755	LOCMI00871	LOCMI00871	LOCMI00871	LOCMI00871	LOCMI00871	LOCMI00871	LOCMI00871	LOCMI00871	LOCMI00871
LOCMI00872	1.90242	1.50333	1.25142	3.02972	2.95295	3.64093	E3 ubiquitin-protein ligase RING2-A	rnf2-a	E3 ubiquitin-protein ligase RING2 [Acromyrmex echinatior]	E3 ubiquitin-protein ligase RING2-A OS=Xenopus laevis GN=rnf2-a PE=2 SV=1	E3 ubiquitin-protein ligase RING2 OS=Acromyrmex echinatior GN=G5I_09482 PE=4 SV=1	COG5222|Uncharacterized conserved protein, contains RING Zn-finger|R|General function prediction only ;	GO:0005515; protein binding; Molecular Function GO:0008270; zinc ion binding; Molecular Function GO:0046872; metal ion binding; Molecular Function	IPR001841; Zinc finger, RING-type IPR013083; Zinc finger, RING/FYVE/PHD-type IPR017907; Zinc finger, RING-type, conserved site IPR018957; Zinc finger, C3HC4 RING-type	K10695
LOCMI00873	97.1187	84.7877	68.953	86.347	118.8	93.7003	AFG3-like protein 1	Afg3l1	AFG3-like protein 2 [Zootermopsis nevadensis]	AFG3-like protein 1 OS=Mus musculus GN=Afg3l1 PE=2 SV=2	Uncharacterized protein OS=Strigamia maritima PE=3 SV=1	COG0465|ATP-dependent Zn proteases|O|Posttranslational modification, protein turnover, chaperones ;	GO:0004222; metalloendopeptidase activity; Molecular Function GO:0005524; ATP binding; Molecular Function GO:0006508; proteolysis; Biological Process	IPR000642; Peptidase M41	NA
LOCMI00874	11.3194	12.4776	11.3879	8.27346	8.29098	11.0299	Protein sel-1 homolog 1	Sel1l	hypothetical protein L798_00668, partial [Zootermopsis nevadensis]	Protein sel-1 homolog 1 OS=Rattus norvegicus GN=Sel1l PE=2 SV=2	Putative uncharacterized protein OS=Pediculus humanus subsp. corporis GN=Phum_PHUM459250 PE=4 SV=1	NA	NA	NA	K14026 SEL1, SEL1L; SEL1 protein K14026 Genetic Information Processing; Folding, sorting and degradation; Protein processing in endoplasmic reticulum [PATH:ko04141]
LOCMI00875	1.52194	4.81065	2.00227	1.39833	6.8145	1.71338	NA	LOCMI00875	hypothetical protein L798_02071 [Zootermopsis nevadensis]	NA	NA	NA	NA	NA	NA
LOCMI00876	0	0	0	0	0	0	Putative uncharacterized protein (Fragment)	LOCMI00876	hypothetical protein SINV_00294 [Solenopsis invicta]	UPF0415 protein C7orf25 homolog OS=Mus musculus PE=2 SV=1	Putative uncharacterized protein (Fragment) OS=Solenopsis invicta GN=SINV_00294 PE=4 SV=1	NA	NA	IPR010733; Protein of unknown function DUF1308	NA
LOCMI00877	0	0	3.0034	36.1236	6.13305	2.57007	LOCMI00877	LOCMI00877	LOCMI00877	LOCMI00877	LOCMI00877	LOCMI00877	LOCMI00877	LOCMI00877	LOCMI00877
LOCMI00878	0.475606	1.35299	2.87826	3.14625	2.61223	3.8551	LOCMI00878	LOCMI00878	LOCMI00878	LOCMI00878	LOCMI00878	LOCMI00878	LOCMI00878	LOCMI00878	LOCMI00878
LOCMI00880	0	0	0.875991	0	0	0	LOCMI00880	LOCMI00880	LOCMI00880	LOCMI00880	LOCMI00880	LOCMI00880	LOCMI00880	LOCMI00880	LOCMI00880
LOCMI00881	0	0	1.5017	0	0.567875	0	26S proteasome non-ATPase regulatory subunit 3	Psmd3	proteasome regulatory particle subunit [Lichtheimia corymbifera JMRC:FSU:9682]	26S proteasome non-ATPase regulatory subunit 3 OS=Mus musculus GN=Psmd3 PE=1 SV=3	Proteasome (Prosome, macropain) 26S subunit, non ATPase, 32, putative OS=Acanthamoeba castellanii str. Neff GN=ACA1_369190 PE=4 SV=1	NA	GO:0000502; proteasome complex; Cellular Component GO:0005515; protein binding; Molecular Function GO:0030234; enzyme regulator activity; Molecular Function GO:0042176; regulation of protein catabolic process; Biological Process	IPR000717; Proteasome component (PCI) domain IPR011991; Winged helix-turn-helix DNA-binding domain IPR013586; 26S proteasome regulatory subunit, C-terminal	NA
LOCMI00882	0	0	0.500566	0	0	0	LOCMI00882	LOCMI00882	LOCMI00882	LOCMI00882	LOCMI00882	LOCMI00882	LOCMI00882	LOCMI00882	LOCMI00882
LOCMI00883	0.570727	0	0	0	0.68145	0.642516	Epithelial discoidin domain-containing receptor 1	Ddr1	GI11466 [Drosophila mojavensis] gb|EDW12129.1| GI11466 [Drosophila mojavensis]	Epithelial discoidin domain-containing receptor 1 OS=Rattus norvegicus GN=Ddr1 PE=2 SV=1	GI11466 OS=Drosophila mojavensis GN=Dmoj\GI11466 PE=4 SV=1	NA	GO:0007155; cell adhesion; Biological Process	IPR000421; Coagulation factor 5/8 C-terminal type domain IPR008979; Galactose-binding domain-like	NA
LOCMI00884	249.788	322.013	557.13	358.672	662.824	378.442	LOCMI00884	LOCMI00884	LOCMI00884	LOCMI00884	LOCMI00884	LOCMI00884	LOCMI00884	LOCMI00884	LOCMI00884
LOCMI00885	0	0	0	0	0	0	Structural maintenance of chromosomes protein 1	SMC1	condensin complex component SMC1 [Physcomitrella patens] gb|EDQ67945.1| condensin complex component SMC1 [Physcomitrella patens]	Structural maintenance of chromosomes protein 1 OS=Arabidopsis thaliana GN=SMC1 PE=2 SV=2	Structural maintenance of chromosomes protein OS=Physcomitrella patens subsp. patens GN=CPC1502 PE=3 SV=1	COG1196|Chromosome segregation ATPases|D|Cell cycle control, cell division, chromosome partitioning ;	GO:0003682; chromatin binding; Molecular Function GO:0007064; mitotic sister chromatid cohesion; Biological Process GO:0008278; cohesin complex; Cellular Component GO:0046982; protein heterodimerization activity; Molecular Function	IPR003395; RecF/RecN/SMC, N-terminal IPR027417; P-loop containing nucleoside triphosphate hydrolase IPR028468; Structural maintenance of chromosomes protein 1	NA
LOCMI00886	3.42436	2.40532	2.75312	2.21403	2.61223	2.89132	Ras-related protein Rab-33B	RAB33B	RAB-33, putative [Ixodes scapularis] gb|EEC17038.1| RAB-33, putative [Ixodes scapularis]	Ras-related protein Rab-33B OS=Pongo abelii GN=RAB33B PE=2 SV=1	RAB-33, putative OS=Ixodes scapularis GN=IscW_ISCW022146 PE=3 SV=1	COG1100|GTPase SAR1 and related small G proteins|R|General function prediction only ;	GO:0003924; GTPase activity; Molecular Function GO:0005525; GTP binding; Molecular Function GO:0005622; intracellular; Cellular Component GO:0006184; GTP catabolic process; Biological Process GO:0006886; intracellular protein transport; Biological Process GO:0006913; nucleocytoplasmic transport; Biological Process GO:0007165; signal transduction; Biological Process GO:0007264; small GTPase mediat…	IPR001806; Small GTPase superfamily IPR002041; Ran GTPase IPR003578; Small GTPase superfamily, Rho type IPR003579; Small GTPase superfamily, Rab type IPR005225; Small GTP-binding protein domain IPR020849; Small GTPase superfamily, Ras type IPR027417; P-loop containing nucleoside triphosphate hydrolase	K07920
LOCMI00887	1.23658	0.601331	3.12854	0	0.908601	0.428344	LOCMI00887	LOCMI00887	LOCMI00887	LOCMI00887	LOCMI00887	LOCMI00887	LOCMI00887	LOCMI00887	LOCMI00887
LOCMI00888	0.951212	1.05233	0.125142	0.932221	1.3629	0.749602	Myeloid zinc finger 1	MZF1	hypothetical protein L798_11626 [Zootermopsis nevadensis]	Myeloid zinc finger 1 OS=Homo sapiens GN=MZF1 PE=1 SV=3	Uncharacterized protein OS=Apis mellifera GN=jim PE=4 SV=1	COG5048|FOG: Zn-finger|R|General function prediction only ;	GO:0003676; nucleic acid binding; Molecular Function GO:0003677; DNA binding; Molecular Function GO:0046872; metal ion binding; Molecular Function	IPR007087; Zinc finger, C2H2 IPR007889; DNA binding HTH domain, Psq-type IPR013087; Zinc finger C2H2-type/integrase DNA-binding domain IPR015880; Zinc finger, C2H2-like	NA
LOCMI00889	5.42191	4.20932	3.87939	7.92388	4.543	2.78424	Xenotropic and polytropic retrovirus receptor 1	Xpr1	Xenotropic and polytropic retrovirus receptor 1-like protein [Zootermopsis nevadensis]	Xenotropic and polytropic retrovirus receptor 1 OS=Mus terricolor GN=Xpr1 PE=1 SV=1	AGAP005557-PA OS=Anopheles gambiae GN=AGAP005557 PE=4 SV=2	NA	GO:0016021; integral component of membrane; Cellular Component	IPR004342; EXS, C-terminal	NA
LOCMI00890	0	0	0	0.466111	0	0	Ribonuclease H2 subunit C	RNH203	Ribonuclease H2 subunit C [Zootermopsis nevadensis]	NA	Putative uncharacterized protein OS=Tribolium castaneum GN=TcasGA2_TC002570 PE=4 SV=1	NA	NA	IPR013924; Ribonuclease H2, subunit C	K10745 RNASEH2C; ribonuclease H2 subunit C K10745 Genetic Information Processing; Replication and repair; DNA replication [PATH:ko03030]
LOCMI00891	36.2412	54.2701	59.5674	69.2174	112.666	102.267	Mitochondrial intermembrane space import and assembly protein 40-B	chchd4-b	mitochondrial intermembrane space import and assembly protein 40-B, putative [Pediculus humanus corporis] gb|EEB19023.1| mitochondrial intermembrane space import and assembly protein 40-B, putative [Pediculus humanus corporis]	Mitochondrial intermembrane space import and assembly protein 40-B OS=Xenopus laevis GN=chchd4-b PE=2 SV=1	Mitochondrial intermembrane space import and assembly protein 40-B, putative OS=Pediculus humanus subsp. corporis GN=Phum_PHUM546540 PE=4 SV=1	NA	NA	NA	K17782
LOCMI00892	0	0.300665	1.62684	0.699166	0	0.214172	TBC1 domain family member 5	Tbc1d5	TBC1 domain family member 5 [Zootermopsis nevadensis]	TBC1 domain family member 5 OS=Mus musculus GN=Tbc1d5 PE=1 SV=2	Uncharacterized protein OS=Rhodnius prolixus PE=4 SV=1	NA	GO:0005097; Rab GTPase activator activity; Molecular Function GO:0032313; regulation of Rab GTPase activity; Biological Process	IPR000195; Rab-GTPase-TBC domain	K18469
LOCMI00893	0	0	0.875991	0	0	0	Snf7	LOCMI00893	NA	NA	NA	NA	GO:0015031; protein transport; Biological Process	IPR005024; Snf7	NA
LOCMI00894	0.190242	0	0.625708	0	0.22715	0	Proteasome subunit beta type-6	psmB6	proteasome subunit beta type 6 [Dictyostelium fasciculatum] gb|EGG17649.1| proteasome subunit beta type 6 [Dictyostelium fasciculatum]	Proteasome subunit beta type-6 OS=Dictyostelium discoideum GN=psmB6 PE=1 SV=1	Proteasome subunit beta type OS=Dictyostelium fasciculatum (strain SH3) GN=psmB6 PE=3 SV=1	COG0638|20S proteasome, alpha and beta subunits|O|Posttranslational modification, protein turnover, chaperones ;	GO:0004175; endopeptidase activity; Molecular Function GO:0004298; threonine-type endopeptidase activity; Molecular Function GO:0005839; proteasome core complex; Cellular Component GO:0051603; proteolysis involved in cellular protein catabolic process; Biological Process	IPR000243; Peptidase T1A, proteasome beta-subunit IPR001353; Proteasome, subunit alpha/beta IPR016050; Proteasome beta-type subunit, conserved site IPR023333; Proteasome B-type subunit	K02738 PSMB6; 20S proteasome subunit beta 1 [EC:3.4.25.1] [EC:3.4.25.1] Genetic Information Processing; Folding, sorting and degradation; Proteasome [PATH:ko03050]
LOCMI00896	2.94876	0.601331	0.500566	0.932221	0.908601	1.28503	LOCMI00896	LOCMI00896	LOCMI00896	LOCMI00896	LOCMI00896	LOCMI00896	LOCMI00896	LOCMI00896	LOCMI00896
LOCMI00899	0	0	0	0	0.567875	1.60629	Sodium/potassium/calcium exchanger 2	Slc24a2	Sodium/potassium/calcium exchanger 5 [Harpegnathos saltator]	Sodium/potassium/calcium exchanger 2 OS=Rattus norvegicus GN=Slc24a2 PE=2 SV=1	Sodium/potassium/calcium exchanger 5 OS=Harpegnathos saltator GN=EAI_03935 PE=4 SV=1	NA	GO:0016021; integral component of membrane; Cellular Component GO:0055085; transmembrane transport; Biological Process	IPR004481; Sodium/potassium/calcium exchanger IPR004837; Sodium/calcium exchanger membrane region	NA
LOCMI00900	0.190242	0.450998	1.25142	0.233055	0	0.321258	Putative inorganic phosphate cotransporter	Picot	Putative inorganic phosphate cotransporter [Zootermopsis nevadensis]	Putative inorganic phosphate cotransporter OS=Drosophila ananassae GN=Picot PE=3 SV=1	AGAP008931-PA OS=Anopheles gambiae GN=AGAP008931 PE=4 SV=4	NA	NA	IPR016196; Major facilitator superfamily domain, general substrate transporter	NA
LOCMI00905	0	0	1.25142	0.349583	0	0	Translation initiation factor eIF-2B subunit alpha	eif2b1	translation initiation factor eIF-2B alpha subunit [Dictyostelium fasciculatum] gb|EGG13296.1| translation initiation factor eIF-2B alpha subunit [Dictyostelium fasciculatum]	Translation initiation factor eIF-2B subunit alpha OS=Dictyostelium discoideum GN=eif2b1 PE=3 SV=1	Translation initiation factor eIF-2B alpha subunit OS=Dictyostelium fasciculatum (strain SH3) GN=eIF2b1 PE=3 SV=1	COG1184|Translation initiation factor 2B subunit, eIF-2B alpha/beta/delta family|J|Translation, ribosomal structure and biogenesis ;	GO:0044237; cellular metabolic process; Biological Process	IPR000649; Initiation factor 2B-related	K18237
LOCMI00906	0	0	0	0	0	0	Fidgetin-like protein 1	Fignl1	PREDICTED: fidgetin-like protein 1 [Tarsius syrichta]	Fidgetin-like protein 1 OS=Rattus norvegicus GN=Fignl1 PE=2 SV=1	Uncharacterized protein OS=Equus caballus GN=FIGNL1 PE=4 SV=1	COG0464|ATPases of the AAA+ class|O|Posttranslational modification, protein turnover, chaperones ;	GO:0000166; nucleotide binding; Molecular Function GO:0005524; ATP binding; Molecular Function GO:0017111; nucleoside-triphosphatase activity; Molecular Function	IPR003593; AAA+ ATPase domain IPR003959; ATPase, AAA-type, core IPR003960; ATPase, AAA-type, conserved site IPR015415; Vps4 oligomerisation, C-terminal IPR027417; P-loop containing nucleoside triphosphate hydrolase	NA
LOCMI00908	1.99754	1.50333	3.37882	1.16528	3.52083	5.88973	Lateral signaling target protein 2 homolog	CPIJ004116	Lateral signaling target protein 2-like protein [Zootermopsis nevadensis]	Lateral signaling target protein 2 homolog OS=Culex quinquefasciatus GN=CPIJ004116 PE=3 SV=1	Zinc finger protein FYVE domain containing protein, putative OS=Pediculus humanus subsp. corporis GN=Phum_PHUM439200 PE=4 SV=1	NA	NA	NA	NA
LOCMI00909	0	0	0.375425	0	0	0	LOCMI00909	LOCMI00909	LOCMI00909	LOCMI00909	LOCMI00909	LOCMI00909	LOCMI00909	LOCMI00909	LOCMI00909
LOCMI00910	12.8414	9.32063	13.0147	4.195	2.95295	4.49761	LOCMI00910	LOCMI00910	LOCMI00910	LOCMI00910	LOCMI00910	LOCMI00910	LOCMI00910	LOCMI00910	LOCMI00910
LOCMI00911	1.52194	1.05233	0.500566	1.16528	1.02218	1.71338	LOCMI00911	LOCMI00911	LOCMI00911	LOCMI00911	LOCMI00911	LOCMI00911	LOCMI00911	LOCMI00911	LOCMI00911
LOCMI00912	10.9389	10.6736	11.7633	10.604	11.6982	10.3873	Ribonuclease H2 subunit B	rnaseh2b	hypothetical protein L798_02104, partial [Zootermopsis nevadensis]	Ribonuclease H2 subunit B OS=Xenopus laevis GN=rnaseh2b PE=2 SV=1	Uncharacterized protein OS=Apis mellifera GN=LOC412488 PE=4 SV=1	NA	GO:0005634; nucleus; Cellular Component	IPR019024; Ribonuclease H2, subunit B	K10744 RNASEH2B; ribonuclease H2 subunit B K10744 Genetic Information Processing; Replication and repair; DNA replication [PATH:ko03030]
LOCMI00913	3.80485	5.71264	6.75765	3.26277	3.40725	3.42675	CUB domain	LOCMI00913	NA	NA	NA	NA	NA	IPR000859; CUB domain	NA
LOCMI00914	16.0755	19.3929	32.1614	19.4601	77.4582	17.455	Tankyrase	Tnks	Chain A, Structural Determinants For Improved Thermal Stability Of Designed Ankyrin Repeat Proteins With A Redesigned C- Capping Module. pdb|2XEH|B Chain B, Structural Determinants For Improved Thermal Stability Of Designed Ankyrin Repeat Proteins With A Redesigned C- Capping Module. pdb|2XEH|C Chain C, Structural Determinants For Improved Thermal Stability Of Designed Ankyrin Repeat Proteins Wit…	Tankyrase OS=Drosophila melanogaster GN=Tnks PE=1 SV=1	Ankyrin OS=Sulfolobus islandicus (strain Y.N.15.51 / Yellowstone #2) GN=YN1551_2013 PE=4 SV=1	COG0666|FOG: Ankyrin repeat|R|General function prediction only ;	GO:0005515; protein binding; Molecular Function	IPR002110; Ankyrin repeat IPR020683; Ankyrin repeat-containing domain	NA
LOCMI00915	115.287	128.534	112.878	79.2388	59.6269	44.0124	Signal peptidase complex subunit 1	Spase12	Signal peptidase complex subunit 1 [Zootermopsis nevadensis]	Signal peptidase complex subunit 1 OS=Drosophila melanogaster GN=Spase12 PE=1 SV=2	Putative signal peptidase subunit (Fragment) OS=Rhodnius prolixus PE=2 SV=1	NA	GO:0005787; signal peptidase complex; Cellular Component GO:0006465; signal peptide processing; Biological Process GO:0008233; peptidase activity; Molecular Function GO:0016021; integral component of membrane; Cellular Component	IPR009542; Microsomal signal peptidase 12kDa subunit	K12946 SPCS1; signal peptidase complex subunit 1 [EC:3.4.-.-] [EC:3.4.-.-] Genetic Information Processing; Folding, sorting and degradation; Chaperones and folding catalysts [BR:ko03110] Genetic Information Processing; Folding, sorting and degradation; Protein export [PATH:ko03060]
LOCMI00916	7.70481	7.3663	4.00453	18.5279	13.9697	14.885	Eukaryotic translation initiation factor 2 subunit 1	EIF2S1	Eukaryotic translation initiation factor 2 subunit 1 [Zootermopsis nevadensis]	Eukaryotic translation initiation factor 2 subunit 1 OS=Gallus gallus GN=EIF2S1 PE=2 SV=2	Eukaryotic translation Initiation Factor 2alpha OS=Pararge aegeria PE=4 SV=1	COG1093|Translation initiation factor 2, alpha subunit (eIF-2alpha)|J|Translation, ribosomal structure and biogenesis ;	NA	IPR024055; Translation initiation factor 2, alpha subunit, C-terminal	NA
LOCMI00918	10.178	4.50998	1.5017	8.27346	6.8145	5.46139	Ribosomal RNA-processing protein 7 homolog A	RRP7A	Ribosomal RNA-processing protein 7-like protein A [Zootermopsis nevadensis]	Ribosomal RNA-processing protein 7 homolog A OS=Homo sapiens GN=RRP7A PE=1 SV=2	Putative uncharacterized protein OS=Pediculus humanus subsp. corporis GN=Phum_PHUM042240 PE=4 SV=1	NA	NA	IPR024326; Ribosomal RNA-processing protein 7	K14545 RRP7; ribosomal RNA-processing protein 7 K14545 Genetic Information Processing; Translation; Ribosome biogenesis in eukaryotes [PATH:ko03008]
LOCMI00919	474.369	5598.09	857.595	816.742	881.57	430.165	unnamed protein product	LOCMI00919	unnamed protein product [Chondrus crispus] emb|CDF41205.1| unnamed protein product [Chondrus crispus]	NA	Stackhouse genomic scaffold, scaffold_729 OS=Chondrus crispus GN=CHC_T00000915001 PE=4 SV=1	NA	NA	NA	NA
LOCMI00920	0	0	0	0	0.340725	0.321258	Protein LMBR1L, partial	LMBR1L	Protein LMBR1L, partial [Zootermopsis nevadensis]	NA	Protein LMBR1L OS=Anoplophora glabripennis GN=LMBRL PE=4 SV=1	NA	NA	IPR006876; LMBR1-like membrane protein	NA
LOCMI00921	36.5265	52.0151	41.9224	21.4411	19.5349	21.6314	Probable cytosolic oligopeptidase A	CYOP	Oligopeptidase A [Zootermopsis nevadensis]	Probable cytosolic oligopeptidase A OS=Arabidopsis thaliana GN=CYOP PE=1 SV=1	AGAP000252-PA OS=Anopheles gambiae GN=AgaP_AGAP000252 PE=3 SV=5	COG0339|Zn-dependent oligopeptidases|E|Amino acid transport and metabolism ;	GO:0004222; metalloendopeptidase activity; Molecular Function GO:0006508; proteolysis; Biological Process	IPR001567; Peptidase M3A/M3B IPR024077; Neurolysin/Thimet oligopeptidase, domain 2	K01414
LOCMI00922	0	0	0	0	0.4543	0.428344	MADF domain	LOCMI00922	NA	NA	Uncharacterized protein OS=Acyrthosiphon pisum PE=4 SV=1	NA	NA	IPR006578; MADF domain	NA
LOCMI00923	0.951212	0	5.63137	1.16528	1.13575	2.99841	LOCMI00923	LOCMI00923	LOCMI00923	LOCMI00923	LOCMI00923	LOCMI00923	LOCMI00923	LOCMI00923	LOCMI00923
LOCMI00924	0	0	0	0	0	0	Probable 26S proteasome non-ATPase regulatory subunit 3	Dox-A2	hypothetical protein L798_15053 [Zootermopsis nevadensis]	Probable 26S proteasome non-ATPase regulatory subunit 3 OS=Anopheles gambiae GN=Dox-A2 PE=3 SV=2	Uncharacterized protein (Fragment) OS=Rhodnius prolixus PE=4 SV=1	NA	GO:0000502; proteasome complex; Cellular Component GO:0005515; protein binding; Molecular Function GO:0030234; enzyme regulator activity; Molecular Function GO:0042176; regulation of protein catabolic process; Biological Process	IPR000717; Proteasome component (PCI) domain IPR011991; Winged helix-turn-helix DNA-binding domain IPR013143; PCI/PINT associated module IPR013586; 26S proteasome regulatory subunit, C-terminal	K03033 PSMD3, RPN3; 26S proteasome regulatory subunit N3 K03033 Genetic Information Processing; Folding, sorting and degradation; Proteasome [PATH:ko03050] Human Diseases; Infectious diseases; Epstein-Barr virus infection [PATH:ko05169]
LOCMI00925	3.80485	2.10466	1.75198	0.699166	0.68145	1.17795	Lon protease homolog 2, peroxisomal	Lonp2	PREDICTED: lon protease homolog 2, peroxisomal-like [Strongylocentrotus purpuratus]	Lon protease homolog 2, peroxisomal OS=Rattus norvegicus GN=Lonp2 PE=1 SV=2	Uncharacterized protein OS=Strongylocentrotus purpuratus GN=Sp-Lonp2 PE=4 SV=1	COG0466|ATP-dependent Lon protease, bacterial type|O|Posttranslational modification, protein turnover, chaperones ;	GO:0004176; ATP-dependent peptidase activity; Molecular Function GO:0004252; serine-type endopeptidase activity; Molecular Function GO:0005524; ATP binding; Molecular Function GO:0030163; protein catabolic process; Biological Process	IPR003959; ATPase, AAA-type, core IPR027065; Lon protease IPR027417; P-loop containing nucleoside triphosphate hydrolase	NA
LOCMI00926	0.190242	0	0.625708	0	0.567875	0.214172	C-Myc-binding protein	MYCBP	hypothetical protein BRAFLDRAFT_115113 [Branchiostoma floridae] gb|EEN60310.1| hypothetical protein BRAFLDRAFT_115113 [Branchiostoma floridae]	C-Myc-binding protein OS=Homo sapiens GN=MYCBP PE=1 SV=3	Putative uncharacterized protein OS=Branchiostoma floridae GN=BRAFLDRAFT_115113 PE=4 SV=1	NA	GO:0003713; transcription coactivator activity; Molecular Function GO:0006355; regulation of transcription, DNA-templated; Biological Process	IPR026060; Associate of Myc 1	NA
LOCMI00928	0.285363	0	0.250283	0	0.22715	0.321258	Desumoylating isopeptidase 1	DESI1	PPPDE peptidase domain-containing protein 2 [Zootermopsis nevadensis]	Desumoylating isopeptidase 1 OS=Homo sapiens GN=DESI1 PE=1 SV=1	Uncharacterized protein OS=Atta cephalotes PE=4 SV=1	NA	NA	IPR008580; PPPDE putative peptidase domain	NA
LOCMI00929	23.8754	39.6878	61.9451	11.0701	24.7594	43.9053	Maltase 2	Mal-B2	hypothetical protein SINV_00797 [Solenopsis invicta]	Maltase 2 OS=Drosophila virilis GN=Mal-B2 PE=3 SV=2	Putative uncharacterized protein (Fragment) OS=Solenopsis invicta GN=SINV_00797 PE=4 SV=1	COG0366|Glycosidases|G|Carbohydrate transport and metabolism ;	GO:0003824; catalytic activity; Molecular Function GO:0005975; carbohydrate metabolic process; Biological Process	IPR013781; Glycoside hydrolase, catalytic domain IPR015902; Glycoside hydrolase, family 13 IPR017853; Glycoside hydrolase, superfamily	NA
LOCMI00930	11.9853	14.7326	12.5142	11.4197	9.65388	10.4944	DCN1-like protein	Dcun1d1	DCN1-like protein 1 [Zootermopsis nevadensis]	DCN1-like protein OS=Drosophila melanogaster GN=CG7427 PE=2 SV=2	Defective in cullin neddylation protein OS=Riptortus pedestris PE=2 SV=1	NA	GO:0005515; protein binding; Molecular Function	IPR005176; Potentiating neddylation domain IPR009060; UBA-like IPR014764; Defective-in-cullin neddylation protein	K17822
LOCMI00931	0.0951212	1.05233	0.125142	0	0	0.107086	Regulatory-associated protein of mTOR	Rptor	PREDICTED: regulatory-associated protein of mTOR isoform X1 [Nasonia vitripennis] ref|XP_008209147.1| PREDICTED: regulatory-associated protein of mTOR isoform X1 [Nasonia vitripennis]	Regulatory-associated protein of mTOR OS=Mus musculus GN=Rptor PE=1 SV=1	Uncharacterized protein OS=Nasonia vitripennis PE=4 SV=1	NA	GO:0031929; TOR signaling; Biological Process GO:0031931; TORC1 complex; Cellular Component	IPR004083; Regulatory associated protein of TOR	NA
LOCMI00932	44.5167	55.6231	65.6993	52.787	41.7956	53.8643	LOCMI00932	LOCMI00932	LOCMI00932	LOCMI00932	LOCMI00932	LOCMI00932	LOCMI00932	LOCMI00932	LOCMI00932
LOCMI00933	15.8852	9.92196	7.13307	8.50652	11.0168	10.7086	C-Jun-amino-terminal kinase-interacting protein 4	Spag9	C-jun-amino-terminal kinase-interacting protein 3 [Zootermopsis nevadensis]	C-Jun-amino-terminal kinase-interacting protein 4 OS=Mus musculus GN=Spag9 PE=1 SV=2	Putative uncharacterized protein OS=Branchiostoma floridae GN=BRAFLDRAFT_117085 PE=4 SV=1	NA	NA	NA	K04436 MAPK8IP3, JIP3; mitogen-activated protein kinase 8 interacting protein 3 K04436 Environmental Information Processing; Signal transduction; MAPK signaling pathway [PATH:ko04010]
LOCMI00934	14.5535	8.11797	9.51076	15.4982	15.5598	13.0645	Nuclear migration protein nudC	NUDC	Nuclear migration protein nudC [Zootermopsis nevadensis]	Nuclear migration protein nudC OS=Gallus gallus GN=NUDC PE=2 SV=1	Nuclear migration protein nudC OS=Danaus plexippus GN=KGM_00495 PE=4 SV=1	NA	NA	IPR008978; HSP20-like chaperone	NA
LOCMI00935	16.0755	16.8373	18.521	10.8371	18.967	11.0299	Something about silencing protein 10	Sas10	NA	Something about silencing protein 10 OS=Drosophila melanogaster GN=Sas10 PE=1 SV=2	NA	NA	NA	IPR018972; Sas10 C-terminal domain	NA
LOCMI00938	4.09021	2.40532	2.25255	5.24374	5.11088	5.78265	Sorting nexin-2	Snx2	Sorting nexin-2 [Zootermopsis nevadensis]	Sorting nexin-2 OS=Mus musculus GN=Snx2 PE=1 SV=2	Uncharacterized protein OS=Nasonia vitripennis PE=4 SV=1	NA	NA	IPR015404; Vps5 C-terminal	K17917
LOCMI00940	0	0	0.500566	0	0	0	Probable geranylgeranyl transferase type-2 subunit beta	rabggtb	putative protein serine/threonine kinase [Polysphondylium pallidum PN500]	Probable geranylgeranyl transferase type-2 subunit beta OS=Dictyostelium discoideum GN=rabggtb PE=3 SV=1	Uncharacterized protein OS=Polysphondylium pallidum GN=PPL_10649 PE=4 SV=1	COG5029|Prenyltransferase, beta subunit|O|Posttranslational modification, protein turnover, chaperones ;	GO:0003824; catalytic activity; Molecular Function GO:0004663; Rab geranylgeranyltransferase activity; Molecular Function GO:0018344; protein geranylgeranylation; Biological Process	IPR001330; Prenyltransferase/squalene oxidase IPR008930; Terpenoid cyclases/protein prenyltransferase alpha-alpha toroid IPR026873; Geranylgeranyl transferase type-2 subunit beta	NA
LOCMI00941	7.51457	6.46431	7.88392	10.0214	10.2218	8.67397	Transcription initiation factor ia, putative	LOCMI00941	hypothetical protein L798_00940, partial [Zootermopsis nevadensis]	NA	Transcription initiation factor ia, putative OS=Pediculus humanus subsp. corporis GN=Phum_PHUM448650 PE=4 SV=1	NA	NA	NA	K15216
LOCMI00942	3.32924	2.10466	2.00227	3.02972	2.7258	2.99841	HEAT repeat-containing protein C7orf27	LOCMI00942	PREDICTED: uncharacterized protein LOC100141760 isoform X1 [Tribolium castaneum]	NA	HEAT repeat-containing protein C7orf27 OS=Camponotus floridanus GN=EAG_05612 PE=4 SV=1	NA	GO:0005488; binding; Molecular Function	IPR011989; Armadillo-like helical IPR016024; Armadillo-type fold	NA
LOCMI00945	25.873	42.2435	32.9122	40.9012	50.3138	52.1509	LOCMI00945	LOCMI00945	LOCMI00945	LOCMI00945	LOCMI00945	LOCMI00945	LOCMI00945	LOCMI00945	LOCMI00945
LOCMI00946	5.51703	4.96098	3.12854	2.91319	1.24933	2.35589	LOCMI00946	LOCMI00946	LOCMI00946	LOCMI00946	LOCMI00946	LOCMI00946	LOCMI00946	LOCMI00946	LOCMI00946
LOCMI00947	11.6999	14.5823	16.0181	18.6444	16.582	18.0975	WD repeat domain phosphoinositide-interacting protein 2	Wipi2	PREDICTED: WD repeat domain phosphoinositide-interacting protein 2-like isoform X1 [Apis dorsata]	WD repeat domain phosphoinositide-interacting protein 2 OS=Rattus norvegicus GN=Wipi2 PE=2 SV=1	Uncharacterized protein OS=Apis mellifera GN=LOC552201 PE=4 SV=2	NA	GO:0005515; protein binding; Molecular Function	IPR001680; WD40 repeat IPR015943; WD40/YVTN repeat-like-containing domain IPR017986; WD40-repeat-containing domain	NA
LOCMI00949	3.42436	4.50998	7.13307	13.9833	6.47378	10.6015	Actin-related protein 3	Actr3	actin, partial [Cryptocercus punctulatus]	Actin-related protein 3 OS=Rattus norvegicus GN=Actr3 PE=1 SV=1	Actin (Fragment) OS=Cryptocercus punctulatus PE=2 SV=1	COG5277|Actin and related proteins|Z|Cytoskeleton ;	NA	IPR004000; Actin-related protein	NA
LOCMI00950	17.8828	14.7326	5.50623	14.6825	16.582	16.17	LOCMI00950	LOCMI00950	LOCMI00950	LOCMI00950	LOCMI00950	LOCMI00950	LOCMI00950	LOCMI00950	LOCMI00950
LOCMI00951	0	0	0	0	0	0	Probable prefoldin subunit 3	Pfd3	hypothetical protein UM03582.1 [Ustilago maydis 521] gb|EAK84473.1| hypothetical protein UM03582.1 [Ustilago maydis 521]	Probable prefoldin subunit 3 OS=Arabidopsis thaliana GN=At5g49510 PE=1 SV=1	Putative uncharacterized protein OS=Ustilago maydis (strain 521 / FGSC 9021) GN=UM03582.1 PE=4 SV=1	NA	GO:0006457; protein folding; Biological Process GO:0016272; prefoldin complex; Cellular Component GO:0051082; unfolded protein binding; Molecular Function	IPR004127; Prefoldin alpha-like IPR009053; Prefoldin IPR016655; Prefoldin, subunit 3	NA
LOCMI00952	0	0	0	0	0	0	Mitochondrial substrate carrier family protein ucpB	ucpB	PREDICTED: mitochondrial substrate carrier family protein ucpB-like [Saccoglossus kowalevskii]	Mitochondrial substrate carrier family protein ucpB OS=Dictyostelium discoideum GN=ucpB PE=3 SV=1	Uncharacterized protein OS=Lottia gigantea GN=LOTGIDRAFT_208602 PE=3 SV=1	NA	NA	IPR018108; Mitochondrial substrate/solute carrier IPR023395; Mitochondrial carrier domain	NA
LOCMI00956	3.80485	4.96098	4.37996	6.52555	9.31316	10.9228	Protein msta, isoform A	msta	Protein msta, isoform B [Zootermopsis nevadensis]	Protein msta, isoform A OS=Drosophila melanogaster GN=msta PE=2 SV=3	Uncharacterized protein (Fragment) OS=Dendroctonus ponderosae GN=YQE_05633 PE=4 SV=1	NA	NA	NA	NA
LOCMI00957	3.32924	1.05233	0.250283	0	3.1801	0	Heat shock 70 kDa protein cognate 1 (Fragments)	Hsc70-1	RecName: Full=Heat shock 70 kDa protein cognate 1; AltName: Full=Heat shock 70 kDa protein 70C	Heat shock 70 kDa protein cognate 1 (Fragments) OS=Drosophila simulans GN=Hsc70-1 PE=2 SV=1	Hsp70d OS=Drosophila virilis GN=Hsp70d PE=3 SV=1	COG0443|Molecular chaperone|O|Posttranslational modification, protein turnover, chaperones ;	NA	IPR013126; Heat shock protein 70 family	NA
LOCMI00958	6.7536	4.66031	6.38222	8.04041	5.67875	3.96218	Sperm-associated antigen 1	SPAG1	Sperm-associated antigen 1 [Zootermopsis nevadensis]	Sperm-associated antigen 1 OS=Homo sapiens GN=SPAG1 PE=1 SV=3	Uncharacterized protein OS=Myotis lucifugus GN=SPAG1 PE=4 SV=1	COG0457|FOG: TPR repeat|R|General function prediction only ;	GO:0005515; protein binding; Molecular Function	IPR011990; Tetratricopeptide-like helical IPR013026; Tetratricopeptide repeat-containing domain IPR019734; Tetratricopeptide repeat	NA
LOCMI00959	1.71218	0.450998	0.75085	0.349583	0	0	ADP-dependent glucokinase	ADPGK	ADP-dependent glucokinase [Zootermopsis nevadensis]	NA	Putative uncharacterized protein (Fragment) OS=Solenopsis invicta GN=SINV_12274 PE=4 SV=1	NA	GO:0005975; carbohydrate metabolic process; Biological Process GO:0016773; phosphotransferase activity, alcohol group as acceptor; Molecular Function	IPR007666; ADP-specific phosphofructokinase/glucokinase	NA
LOCMI00960	0.475606	0	0	0	0	0	LOCMI00960	LOCMI00960	LOCMI00960	LOCMI00960	LOCMI00960	LOCMI00960	LOCMI00960	LOCMI00960	LOCMI00960
LOCMI00961	4.47069	5.56231	6.75765	7.80735	5.79233	10.8157	Mediator of RNA polymerase II transcription subunit 12	kto	Mediator of RNA polymerase II transcription subunit 12 [Zootermopsis nevadensis]	Mediator of RNA polymerase II transcription subunit 12 OS=Drosophila melanogaster GN=kto PE=1 SV=2	Uncharacterized protein (Fragment) OS=Rhodnius prolixus PE=4 SV=1	NA	NA	IPR021990; Mediator complex, subunit Med12, LCEWAV-domain	NA
LOCMI00962	0.380485	0	0	0	0.22715	0	Uncharacterized protein C1orf131	C1orf131	unknown unsecreted protein [Papilio xuthus]	Uncharacterized protein C1orf131 OS=Homo sapiens GN=C1orf131 PE=1 SV=3	Uncharacterized protein OS=Papilio xuthus PE=2 SV=1	NA	NA	IPR027973; Protein of unknown function DUF4602	NA
LOCMI00963	0.0951212	0.150333	0.125142	0	0	0.214172	Importin-9	Ipo9	PREDICTED: importin-9 isoform 4 [Dasypus novemcinctus]	Importin-9 OS=Mus musculus GN=Ipo9 PE=1 SV=3	Uncharacterized protein OS=Gorilla gorilla gorilla GN=101152696 PE=4 SV=1	COG5657|CAS/CSE protein involved in chromosome segregation|D|Cell cycle control, cell division, chromosome partitioning ;	GO:0005488; binding; Molecular Function GO:0006886; intracellular protein transport; Biological Process GO:0008536; Ran GTPase binding; Molecular Function	IPR001494; Importin-beta, N-terminal domain IPR011989; Armadillo-like helical IPR016024; Armadillo-type fold	NA
LOCMI00964	0.285363	0	0	0	0	0	LOCMI00964	LOCMI00964	LOCMI00964	LOCMI00964	LOCMI00964	LOCMI00964	LOCMI00964	LOCMI00964	LOCMI00964
LOCMI00965	0.570727	0	1.37656	0	0	0	LOCMI00965	LOCMI00965	LOCMI00965	LOCMI00965	LOCMI00965	LOCMI00965	LOCMI00965	LOCMI00965	LOCMI00965
LOCMI00966	0.380485	0	0.250283	0	0	0	LOCMI00966	LOCMI00966	LOCMI00966	LOCMI00966	LOCMI00966	LOCMI00966	LOCMI00966	LOCMI00966	LOCMI00966
LOCMI00968	5.51703	2.40532	1.00113	0.466111	2.15793	0.856688	LOCMI00968	LOCMI00968	LOCMI00968	LOCMI00968	LOCMI00968	LOCMI00968	LOCMI00968	LOCMI00968	LOCMI00968
LOCMI00969	5.23166	5.11131	5.00566	8.15694	5.9059	7.17477	Dosage compensation regulator	mle	hypothetical protein LOTGIDRAFT_116243 [Lottia gigantea]	Dosage compensation regulator OS=Drosophila melanogaster GN=mle PE=2 SV=2	Uncharacterized protein OS=Lottia gigantea GN=LOTGIDRAFT_116243 PE=4 SV=1	COG1643|HrpA-like helicases|L|Replication, recombination and repair ;	GO:0003676; nucleic acid binding; Molecular Function GO:0004386; helicase activity; Molecular Function GO:0005524; ATP binding; Molecular Function	IPR001650; Helicase, C-terminal IPR007502; Helicase-associated domain IPR014720; Double-stranded RNA-binding domain IPR027417; P-loop containing nucleoside triphosphate hydrolase	K13184
LOCMI00972	0.570727	0	0.500566	0.466111	0.908601	0.428344	BESS motif	LOCMI00972	PREDICTED: uncharacterized protein LOC100574550 [Acyrthosiphon pisum]	NA	Uncharacterized protein OS=Acyrthosiphon pisum PE=4 SV=1	NA	GO:0003677; DNA binding; Molecular Function	IPR004210; BESS motif	NA
LOCMI00973	0.190242	0	0	0.349583	0.340725	0	F-box/LRR-repeat protein 7	FBXL7	F-box/LRR-repeat protein 7 [Acromyrmex echinatior]	NA	Uncharacterized protein OS=Atta cephalotes PE=4 SV=1	NA	GO:0003677; DNA binding; Molecular Function GO:0005634; nucleus; Cellular Component	IPR001739; Methyl-CpG DNA binding IPR016177; DNA-binding domain	NA
LOCMI00974	2.28291	2.40532	0.500566	3.72888	2.2715	3.42675	LOCMI00974	LOCMI00974	LOCMI00974	LOCMI00974	LOCMI00974	LOCMI00974	LOCMI00974	LOCMI00974	LOCMI00974
LOCMI00975	3.139	1.50333	3.87939	3.61236	1.13575	1.39212	GNRHR gonadotropin-releasing hormone receptor	AkhR	adipokinetic hormone receptor [Tribolium castaneum] ref|XP_008195552.1| PREDICTED: adipokinetic hormone receptor isoform X1 [Tribolium castaneum] gb|ABE02225.1| adipokinetic hormone receptor [Tribolium castaneum] gb|ABN79650.1| adipokinetic hormone receptor [Tribolium castaneum] gb|EFA07516.1| hypothetical protein TcasGA2_TC009772, partial [Tribolium castaneum]	NA	Adipokinetic hormone receptor OS=Tribolium castaneum GN=akhr PE=2 SV=1	NA	NA	NA	K04280 GNRHR; gonadotropin-releasing hormone receptor K04280 Environmental Information Processing; Signaling molecules and interaction; G protein-coupled receptors [BR:ko04030] Environmental Information Processing; Signaling molecules and interaction; Enzyme-linked receptors [BR:ko01020] Environmental Information Processing; Signaling molecules and interaction; Cytokine receptors [BR:ko04050] Env…
LOCMI00978	7.13409	4.20932	5.63137	5.01069	5.56518	8.03145	Cytoplasmic protein NCK1	Nck1	Cytoplasmic protein NCK1 [Zootermopsis nevadensis]	Cytoplasmic protein NCK1 OS=Mus musculus GN=Nck1 PE=1 SV=1	Uncharacterized protein OS=Atta cephalotes PE=4 SV=1	NA	GO:0005515; protein binding; Molecular Function	IPR000980; SH2 domain IPR001452; Src homology-3 domain	K07365 NCK; NCK adaptor protein K07365 Environmental Information Processing; Signal transduction; ErbB signaling pathway [PATH:ko04012] Organismal Systems; Immune system; T cell receptor signaling pathway [PATH:ko04660] Human Diseases; Infectious diseases; Pathogenic Escherichia coli infection [PATH:ko05130]
LOCMI00979	3.70973	4.66031	0	0	1.3629	0	Putative uncharacterized protein	LOCMI00979	hypothetical protein L798_01772 [Zootermopsis nevadensis]	NA	Putative uncharacterized protein OS=Camponotus floridanus GN=EAG_01462 PE=4 SV=1	NA	NA	NA	NA
LOCMI00980	26.729	25.2559	16.6438	17.5957	23.51	16.4913	Translin-associated protein X	Tsnax	Translin-associated protein X [Zootermopsis nevadensis]	Translin-associated protein X OS=Mus musculus GN=Tsnax PE=1 SV=1	Uncharacterized protein OS=Nasonia vitripennis PE=4 SV=1	NA	GO:0043565; sequence-specific DNA binding; Molecular Function	IPR002848; Translin IPR016069; Translin, C-terminal	NA
LOCMI00982	0.665848	0.450998	0.625708	2.0975	0.4543	1.4992	Uncharacterized protein KIAA0329/KIAA0297	LOCMI00982	Uncharacterized protein KIAA0329/KIAA0297 [Camponotus floridanus]	NA	Uncharacterized protein KIAA0329/KIAA0297 OS=Camponotus floridanus GN=EAG_10009 PE=4 SV=1	NA	NA	NA	NA
LOCMI00983	4.85118	5.26165	5.88166	4.31152	4.42943	3.74801	D-threo-3-hydroxyaspartate dehydratase	dthadh	PREDICTED: D-serine dehydratase-like [Python bivittatus]	D-threo-3-hydroxyaspartate dehydratase OS=Delftia sp. (strain HT23) GN=dthadh PE=1 SV=1	Putative uncharacterized protein OS=Branchiostoma floridae GN=BRAFLDRAFT_86730 PE=4 SV=1	COG3616|Predicted amino acid aldolase or racemase|E|Amino acid transport and metabolism ;	NA	NA	NA
LOCMI00984	0	0.450998	0.375425	0.349583	0.340725	1.82046	LOCMI00984	LOCMI00984	LOCMI00984	LOCMI00984	LOCMI00984	LOCMI00984	LOCMI00984	LOCMI00984	LOCMI00984
LOCMI00985	0	0	0.875991	0.349583	0.113575	0	Calpain-B	CalpB	Calpain-A [Zootermopsis nevadensis]	Calpain-B OS=Drosophila melanogaster GN=CalpB PE=1 SV=2	Putative uncharacterized protein OS=Tribolium castaneum GN=TcasGA2_TC002116 PE=4 SV=1	NA	NA	IPR022682; Peptidase C2, calpain, large subunit, domain III IPR022683; Peptidase C2, calpain, domain III	NA
LOCMI00987	0	0	1.25142	1.98097	0.340725	0.214172	Serine protease snake	snk	Serine protease snake [Zootermopsis nevadensis]	Venom protease OS=Megabombus pennsylvanicus PE=1 SV=1	Serine proteinase OS=Scylla paramamosain GN=sp PE=2 SV=1	COG5640|Secreted trypsin-like serine protease|O|Posttranslational modification, protein turnover, chaperones ;	GO:0003824; catalytic activity; Molecular Function GO:0004252; serine-type endopeptidase activity; Molecular Function GO:0006508; proteolysis; Biological Process	IPR001254; Peptidase S1 IPR001314; Peptidase S1A, chymotrypsin-type IPR009003; Trypsin-like cysteine/serine peptidase domain IPR018114; Peptidase S1, trypsin family, active site	NA
LOCMI00988	0	0.601331	0	0	0.4543	1.92755	LOCMI00988	LOCMI00988	LOCMI00988	LOCMI00988	LOCMI00988	LOCMI00988	LOCMI00988	LOCMI00988	LOCMI00988
LOCMI00991	0	0	0.250283	0	0	0	Protein G12	Allergen	major allergen Bla g 1.0101 [Blattella germanica]	Protein G12 OS=Anopheles gambiae GN=AGAP006187 PE=2 SV=2	Major allergen Bla g 1.0101 (Fragment) OS=Blattella germanica PE=1 SV=1	NA	NA	IPR010629; Insect allergen-related	NA
LOCMI00995	0.380485	0	0	0	0.4543	0	LOCMI00995	LOCMI00995	LOCMI00995	LOCMI00995	LOCMI00995	LOCMI00995	LOCMI00995	LOCMI00995	LOCMI00995
LOCMI00998	75.1457	93.3566	74.4593	126.899	190.465	152.169	Mitochondrial dimethyladenosine transferase 1	TFB1M	AGAP012129-PA [Anopheles gambiae str. PEST] gb|EAA00207.3| AGAP012129-PA [Anopheles gambiae str. PEST]	Mitochondrial dimethyladenosine transferase 1 OS=Bos taurus GN=TFB1M PE=2 SV=2	AGAP012129-PA (Fragment) OS=Anopheles gambiae GN=AGAP012129 PE=4 SV=3	COG0030|Dimethyladenosine transferase (rRNA methylation)|J|Translation, ribosomal structure and biogenesis ;	GO:0000154; rRNA modification; Biological Process GO:0000179; rRNA (adenine-N6,N6-)-dimethyltransferase activity; Molecular Function GO:0008649; rRNA methyltransferase activity; Molecular Function	IPR001737; Ribosomal RNA adenine methylase transferase IPR018628; Coiled-coil domain-containing protein 56 IPR020598; Ribosomal RNA adenine methylase transferase, N-terminal	K15266
LOCMI00999	0.285363	0	1.75198	3.14625	0.795025	1.82046	Beta-glucuronidase (Fragment)	GUSB	PREDICTED: beta-glucuronidase isoform X1 [Acyrthosiphon pisum]	Beta-glucuronidase (Fragment) OS=Chlorocebus aethiops GN=GUSB PE=2 SV=1	Uncharacterized protein OS=Acyrthosiphon pisum GN=LOC100168343 PE=4 SV=1	COG3250|Beta-galactosidase/beta-glucuronidase|G|Carbohydrate transport and metabolism ;	NA	IPR008979; Galactose-binding domain-like	NA
LOCMI01000	0.380485	0	0.500566	0	0	0	LOCMI01000	LOCMI01000	LOCMI01000	LOCMI01000	LOCMI01000	LOCMI01000	LOCMI01000	LOCMI01000	LOCMI01000
LOCMI01001	44.6118	40.8905	31.9111	20.7419	33.5046	29.3416	Voltage-dependent calcium channel subunit alpha-2/delta-3	Cacna2d3	conserved hypothetical protein [Pediculus humanus corporis] gb|EEB14544.1| conserved hypothetical protein [Pediculus humanus corporis]	Voltage-dependent calcium channel subunit alpha-2/delta-3 OS=Rattus norvegicus GN=Cacna2d3 PE=1 SV=1	Putative uncharacterized protein OS=Pediculus humanus subsp. corporis GN=Phum_PHUM308330 PE=4 SV=1	NA	NA	NA	NA
LOCMI01003	0	0	0	0	0	0	Otoferlin	OTOF	PREDICTED: otoferlin isoform X3 [Erinaceus europaeus]	Otoferlin OS=Homo sapiens GN=OTOF PE=1 SV=3	Uncharacterized protein OS=Acyrthosiphon pisum GN=LOC100159656 PE=4 SV=1	NA	NA	NA	NA
LOCMI01005	0.665848	0	1.87712	1.74791	0.4543	0.428344	40S ribosomal protein S25	rps25	ribosomal protein S25, component of cytosolic 80S ribosome and 40S small subunit [Chlamydomonas reinhardtii] gb|EDP02658.1| ribosomal protein S25 [Chlamydomonas reinhardtii]	40S ribosomal protein S25 OS=Dictyostelium discoideum GN=rps25 PE=3 SV=1	Ribosomal protein S25 OS=Chlamydomonas reinhardtii GN=RPS25 PE=1 SV=1	COG4901|Ribosomal protein S25|J|Translation, ribosomal structure and biogenesis ;	NA	IPR004977; Ribosomal protein S25	K02975 RP-S25e, RPS25; small subunit ribosomal protein S25e K02975 Genetic Information Processing; Translation; Ribosome [PATH:ko03010]
LOCMI01006	0	0	0	0.233055	0	0.214172	Putative neurofilament heavy polypeptide	LOCMI01006	hypothetical protein L798_06067 [Zootermopsis nevadensis]	NA	Putative neurofilament heavy polypeptide OS=Rhipicephalus pulchellus PE=2 SV=1	NA	NA	NA	NA
LOCMI01007	20.451	14.1313	27.7814	5.70985	11.8118	12.7432	Gamma-interferon-inducible lysosomal thiol reductase	IFI30	gamma-interferon-inducible lysosomal thiol reductase precursor, putative [Pediculus humanus corporis] gb|EEB15696.1| gamma-interferon-inducible lysosomal thiol reductase precursor, putative [Pediculus humanus corporis]	Gamma-interferon-inducible lysosomal thiol reductase OS=Bos taurus GN=IFI30 PE=2 SV=1	Putative gamma-interferon inducible lysosomal thiol reductase (Fragment) OS=Psorophora albipes PE=2 SV=1	NA	NA	IPR004911; Gamma interferon inducible lysosomal thiol reductase GILT	NA
LOCMI01008	1.42682	0.751664	1.00113	0.582638	0.113575	1.92755	2',3'-cyclic-nucleotide 3'-phosphodiesterase	Cnp	hypothetical protein BRAFLDRAFT_66963 [Branchiostoma floridae] gb|EEN54584.1| hypothetical protein BRAFLDRAFT_66963 [Branchiostoma floridae]	2',3'-cyclic-nucleotide 3'-phosphodiesterase OS=Rattus norvegicus GN=Cnp PE=1 SV=2	Putative uncharacterized protein OS=Branchiostoma floridae GN=BRAFLDRAFT_66963 PE=4 SV=1	NA	GO:0003824; catalytic activity; Molecular Function GO:0004113; 2',3'-cyclic-nucleotide 3'-phosphodiesterase activity; Molecular Function GO:0009214; cyclic nucleotide catabolic process; Biological Process GO:0016020; membrane; Cellular Component	IPR008431; Cyclic nucleotide phosphodiesterase IPR009097; RNA ligase/cyclic nucleotide phosphodiesterase	K01121
LOCMI01009	1.14145	0.901996	0.75085	1.63139	0.908601	1.28503	Protein CNPPD1	CNPPD1	PREDICTED: protein CNPPD1 [Nasonia vitripennis]	Protein CNPPD1 OS=Gallus gallus GN=CNPPD1 PE=2 SV=1	Uncharacterized protein OS=Nasonia vitripennis PE=4 SV=1	NA	GO:0000079; regulation of cyclin-dependent protein serine/threonine kinase activity; Biological Process GO:0019901; protein kinase binding; Molecular Function	IPR013922; Cyclin PHO80-like	NA
LOCMI01011	8.18042	11.4253	9.6359	10.0214	12.834	10.9228	Transport and Golgi organization protein 6 homolog	Tango6	Transmembrane and coiled-coil domain-containing protein 7 [Zootermopsis nevadensis]	Transport and Golgi organization protein 6 homolog OS=Mus musculus GN=Tango6 PE=2 SV=1	Uncharacterized protein OS=Nasonia vitripennis PE=4 SV=1	NA	GO:0005488; binding; Molecular Function	IPR011989; Armadillo-like helical IPR016024; Armadillo-type fold IPR019414; Domain of unknown function DUF2411 IPR019451; Domain of unknown function DUF2435	NA
LOCMI01013	2.56827	0.901996	1.75198	3.26277	2.38508	2.67715	Nucleosome-remodeling factor subunit NURF301	E(bx)	Nucleosome-remodeling factor subunit [Zootermopsis nevadensis]	Nucleosome-remodeling factor subunit NURF301 OS=Drosophila melanogaster GN=E(bx) PE=1 SV=2	Putative uncharacterized protein (Fragment) OS=Solenopsis invicta GN=SINV_12870 PE=4 SV=1	NA	NA	NA	NA
LOCMI01014	0.190242	0.751664	0	0	0	0	LOCMI01014	LOCMI01014	LOCMI01014	LOCMI01014	LOCMI01014	LOCMI01014	LOCMI01014	LOCMI01014	LOCMI01014
LOCMI01015	1.99754	0.751664	0.625708	0.582638	0	0.321258	juvenile hormone acid methyltransferase	JHAMT	juvenile hormone acid methyltransferase [Schistocerca gregaria]	NA	Juvenile hormone acid methyltransferase OS=Schistocerca gregaria GN=JHAMT PE=2 SV=1	NA	NA	NA	NA
LOCMI01016	11.2243	14.2816	12.389	18.994	15.4462	14.992	Synaptosomal-associated protein 29	SNAP29	PREDICTED: synaptosomal-associated protein 29-like [Bombus terrestris]	Synaptosomal-associated protein 29 OS=Pongo abelii GN=SNAP29 PE=2 SV=1	Synaptosomal-associated protein 29 OS=Acromyrmex echinatior GN=G5I_00453 PE=4 SV=1	NA	NA	NA	K08509 SNAP29; synaptosomal-associated protein 29 K08509 Genetic Information Processing; Folding, sorting and degradation; SNARE interactions in vesicular transport [PATH:ko04130]
LOCMI01017	1.42682	3.30732	2.12741	1.04875	0.68145	0.53543	Acid sphingomyelinase-like phosphodiesterase 3a	SMPDL3A	hypothetical protein L798_04614, partial [Zootermopsis nevadensis]	Acid sphingomyelinase-like phosphodiesterase 3a OS=Homo sapiens GN=SMPDL3A PE=1 SV=2	Putative uncharacterized protein OS=Pediculus humanus subsp. corporis GN=Phum_PHUM536070 PE=4 SV=1	NA	NA	NA	K01128
LOCMI01020	0.475606	0.300665	0	0.582638	1.24933	0.963774	Tectonin beta-propeller repeat-containing protein 2	TECPR2	hypothetical protein Phum_PHUM278630 [Pediculus humanus corporis] gb|EEB14073.1| hypothetical protein Phum_PHUM278630 [Pediculus humanus corporis]	Tectonin beta-propeller repeat-containing protein 2 OS=Homo sapiens GN=TECPR2 PE=1 SV=4	Uncharacterized protein OS=Rhodnius prolixus PE=4 SV=1	NA	NA	IPR006624; Beta-propeller repeat TECPR	NA
LOCMI01021	0	0	0.375425	0.349583	0	0.321258	LOCMI01021	LOCMI01021	LOCMI01021	LOCMI01021	LOCMI01021	LOCMI01021	LOCMI01021	LOCMI01021	LOCMI01021
LOCMI01024	0	0	0	0.233055	0	0	Peroxisome assembly factor 2	Pex6	Peroxisome assembly factor 2 [Crassostrea gigas]	Peroxisome assembly factor 2 OS=Rattus norvegicus GN=Pex6 PE=1 SV=1	Peroxisome assembly factor 2 OS=Crassostrea gigas GN=CGI_10010674 PE=4 SV=1	COG0464|ATPases of the AAA+ class|O|Posttranslational modification, protein turnover, chaperones ;	GO:0005524; ATP binding; Molecular Function	IPR003959; ATPase, AAA-type, core IPR027417; P-loop containing nucleoside triphosphate hydrolase	NA
LOCMI01025	3.04388	2.85632	3.75425	5.94291	1.59005	3.21258	LOCMI01025	LOCMI01025	LOCMI01025	LOCMI01025	LOCMI01025	LOCMI01025	LOCMI01025	LOCMI01025	LOCMI01025
LOCMI01026	0.475606	0	0	3.49583	4.0887	2.35589	Apoptosis regulatory protein Siva	Siva1	Apoptosis regulatory protein Siva [Camponotus floridanus]	Apoptosis regulatory protein Siva OS=Mus musculus GN=Siva1 PE=1 SV=1	Apoptosis regulatory protein Siva OS=Camponotus floridanus GN=EAG_06634 PE=4 SV=1	NA	NA	IPR022773; Siva	NA
LOCMI01028	0	0	0.375425	0	0	0	inwardly rectifying k+ channel	GIRKs	inwardly rectifying k+ channel [Danaus plexippus]	NA	Inwardly rectifying k+ channel OS=Danaus plexippus GN=KGM_17749 PE=3 SV=1	NA	GO:0005242; inward rectifier potassium channel activity; Molecular Function GO:0006813; potassium ion transport; Biological Process GO:0016021; integral component of membrane; Cellular Component	IPR016449; Potassium channel, inwardly rectifying, Kir	NA
LOCMI01029	0	0	0.500566	0	0	0	LOCMI01029	LOCMI01029	LOCMI01029	LOCMI01029	LOCMI01029	LOCMI01029	LOCMI01029	LOCMI01029	LOCMI01029
LOCMI01030	22.4486	18.1903	37.2922	51.1556	54.6296	32.34	Acylpyruvase FAHD1, mitochondrial	FAHD1	hypothetical protein L798_05759, partial [Zootermopsis nevadensis]	Acylpyruvase FAHD1, mitochondrial OS=Bos taurus GN=FAHD1 PE=2 SV=1	Fumarylacetoacetate hydrolase domain-containing protein, putative OS=Pediculus humanus subsp. corporis GN=Phum_PHUM459470 PE=4 SV=1	COG0179|2-keto-4-pentenoate hydratase/2-oxohepta-3-ene-1,7-dioic acid hydratase (catechol pathway)|Q|Secondary metabolites biosynthesis, transport and catabolism ;	GO:0003824; catalytic activity; Molecular Function GO:0008152; metabolic process; Biological Process	IPR002529; Fumarylacetoacetase, C-terminal IPR011234; Fumarylacetoacetase, C-terminal-related	K01557 FAHD1; acylpyruvate hydrolase [EC:3.7.1.5] [EC:3.7.1.5] Metabolism; Amino acid metabolism; Tyrosine metabolism [PATH:ko00350]
LOCMI01031	37.8582	31.1189	38.2933	30.8798	31.3467	31.6975	LOCMI01031	LOCMI01031	LOCMI01031	LOCMI01031	LOCMI01031	LOCMI01031	LOCMI01031	LOCMI01031	LOCMI01031
LOCMI01032	0	0.150333	0	0.349583	0.113575	0.214172	Importin-9	Ipo9	Importin-9 [Zootermopsis nevadensis]	Importin-9 OS=Mus musculus GN=Ipo9 PE=1 SV=3	Putative importin 9 (Fragment) OS=Desmodus rotundus PE=2 SV=1	COG5657|CAS/CSE protein involved in chromosome segregation|D|Cell cycle control, cell division, chromosome partitioning ;	GO:0005488; binding; Molecular Function	IPR011989; Armadillo-like helical IPR016024; Armadillo-type fold	NA
LOCMI01033	0	0.150333	0	0	0	0	Peroxidasin	Pxn	conserved hypothetical protein [Pediculus humanus corporis] gb|EEB12828.1| conserved hypothetical protein [Pediculus humanus corporis]	Peroxidasin OS=Drosophila melanogaster GN=Pxn PE=1 SV=1	Putative uncharacterized protein OS=Pediculus humanus subsp. corporis GN=Phum_PHUM209460 PE=4 SV=1	NA	GO:0004601; peroxidase activity; Molecular Function GO:0006979; response to oxidative stress; Biological Process GO:0020037; heme binding; Molecular Function GO:0055114; oxidation-reduction process; Biological Process	IPR002007; Haem peroxidase, animal IPR010255; Haem peroxidase IPR019791; Haem peroxidase, animal, subgroup	NA
LOCMI01034	0	1.50333	0	0	0.340725	0	LOCMI01034	LOCMI01034	LOCMI01034	LOCMI01034	LOCMI01034	LOCMI01034	LOCMI01034	LOCMI01034	LOCMI01034
LOCMI01035	12.7462	22.3996	31.4105	11.6528	19.9892	18.4188	PREDICTED: maltase 2-like	glucosidase	PREDICTED: maltase 2-like [Acyrthosiphon pisum]	Alpha-glucosidase OS=Apis mellifera PE=1 SV=1	Uncharacterized protein OS=Acyrthosiphon pisum GN=LOC100161439 PE=4 SV=1	COG0366|Glycosidases|G|Carbohydrate transport and metabolism ;	GO:0003824; catalytic activity; Molecular Function GO:0005975; carbohydrate metabolic process; Biological Process GO:0043169; cation binding; Molecular Function	IPR006047; Glycosyl hydrolase, family 13, catalytic domain IPR006589; Glycosyl hydrolase, family 13, subfamily, catalytic domain IPR013781; Glycoside hydrolase, catalytic domain IPR015902; Glycoside hydrolase, family 13 IPR017853; Glycoside hydrolase, superfamily	NA
LOCMI01036	3.23412	2.40532	1.37656	2.56361	1.8172	3.42675	Spermine oxidase	Smox	Peroxisomal N(1)-acetyl-spermine/spermidine oxidase [Zootermopsis nevadensis]	Spermine oxidase OS=Mus musculus GN=Smox PE=1 SV=1	AGAP002616-PA OS=Anopheles gambiae GN=AgaP_AGAP002616 PE=4 SV=4	COG1231|Monoamine oxidase|E|Amino acid transport and metabolism ;	GO:0016491; oxidoreductase activity; Molecular Function GO:0055114; oxidation-reduction process; Biological Process	IPR002937; Amine oxidase	NA
LOCMI01037	0	0	0.75085	0	0	0	Protein of unknown function DUF227 Protein kinase-like domain	LOCMI01037	hypothetical protein D910_05868 [Dendroctonus ponderosae]	NA	Uncharacterized protein OS=Dendroctonus ponderosae GN=D910_05868 PE=4 SV=1	NA	GO:0016772; transferase activity, transferring phosphorus-containing groups; Molecular Function	IPR004119; Protein of unknown function DUF227 IPR011009; Protein kinase-like domain	NA
LOCMI01038	0.475606	0	0	0	2.83938	1.07086	LOCMI01038	LOCMI01038	LOCMI01038	LOCMI01038	LOCMI01038	LOCMI01038	LOCMI01038	LOCMI01038	LOCMI01038
LOCMI01039	52.602	47.3548	61.4445	58.2638	50.3138	51.8296	LOCMI01039	LOCMI01039	LOCMI01039	LOCMI01039	LOCMI01039	LOCMI01039	LOCMI01039	LOCMI01039	LOCMI01039
LOCMI01040	0	0	0.125142	0	0	0	Aminopeptidase N	ANPEP	Aminopeptidase N, partial [Zootermopsis nevadensis]	Aminopeptidase N OS=Felis catus GN=ANPEP PE=1 SV=3	Uncharacterized protein OS=Atta cephalotes PE=4 SV=1	COG0308|Aminopeptidase N|E|Amino acid transport and metabolism ;	GO:0006508; proteolysis; Biological Process GO:0008237; metallopeptidase activity; Molecular Function GO:0008270; zinc ion binding; Molecular Function	IPR001930; Peptidase M1, alanine aminopeptidase/leukotriene A4 hydrolase IPR014782; Peptidase M1, membrane alanine aminopeptidase, N-terminal	NA
LOCMI01042	4.66094	2.70599	3.75425	4.31152	4.88373	2.99841	Heparan sulfate glucosamine 3-O-sulfotransferase 3A1	HS3ST3A1	Heparan sulfate glucosamine 3-O-sulfotransferase 3A1 [Zootermopsis nevadensis]	Heparan sulfate glucosamine 3-O-sulfotransferase 3A1 OS=Homo sapiens GN=HS3ST3A1 PE=1 SV=1	Putative uncharacterized protein OS=Tribolium castaneum GN=TcasGA2_TC005759 PE=4 SV=1	NA	GO:0008146; sulfotransferase activity; Molecular Function	IPR000863; Sulfotransferase domain IPR027417; P-loop containing nucleoside triphosphate hydrolase	K07809 HS3ST3; [heparan sulfate]-glucosamine 3-sulfotransferase 3 [EC:2.8.2.30] [heparan sulfate]-glucosamine 3-sulfotransferase 3 [EC:2.8.2.30] Metabolism; Glycan biosynthesis and metabolism; Glycosaminoglycan biosynthesis - heparan sulfate / heparin [PATH:ko00534]
LOCMI01043	0	0.601331	0	0.466111	0.795025	1.17795	LOCMI01043	LOCMI01043	LOCMI01043	LOCMI01043	LOCMI01043	LOCMI01043	LOCMI01043	LOCMI01043	LOCMI01043
LOCMI01044	0.190242	0	0	0	0.567875	0	Peritrophin-1	Aper1	hypothetical protein AND_002523 [Anopheles darlingi]	Peritrophin-1 OS=Anopheles gambiae GN=Aper1 PE=2 SV=2	Uncharacterized protein OS=Anopheles darlingi GN=AND_002523 PE=4 SV=1	NA	GO:0005576; extracellular region; Cellular Component GO:0006030; chitin metabolic process; Biological Process GO:0008061; chitin binding; Molecular Function	IPR002557; Chitin binding domain	NA
LOCMI01047	3.51948	1.50333	1.5017	3.14625	1.13575	4.49761	Putative uncharacterized protein	LOCMI01047	hypothetical protein L798_04307 [Zootermopsis nevadensis]	NA	Putative uncharacterized protein OS=Camponotus floridanus GN=EAG_08478 PE=4 SV=1	NA	NA	NA	NA
LOCMI01048	21.8779	15.4843	21.6495	10.1379	5.33803	8.88814	LOCMI01048	LOCMI01048	LOCMI01048	LOCMI01048	LOCMI01048	LOCMI01048	LOCMI01048	LOCMI01048	LOCMI01048
LOCMI01049	1.04633	0	0	0.699166	0	0.321258	LOCMI01049	LOCMI01049	LOCMI01049	LOCMI01049	LOCMI01049	LOCMI01049	LOCMI01049	LOCMI01049	LOCMI01049
LOCMI01051	1.04633	0.450998	0.75085	1.2818	1.02218	0.963774	Probable Rho GTPase-activating protein CG5521	Ralgapa1	PREDICTED: ral GTPase-activating protein subunit alpha-1 isoform X2 [Acyrthosiphon pisum]	Probable Rho GTPase-activating protein CG5521 OS=Drosophila melanogaster GN=CG5521 PE=1 SV=2	Uncharacterized protein OS=Acyrthosiphon pisum PE=4 SV=1	NA	GO:0005096; GTPase activator activity; Molecular Function GO:0005634; nucleus; Cellular Component GO:0043547; positive regulation of GTPase activity; Biological Process GO:0051056; regulation of small GTPase mediated signal transduction; Biological Process	IPR000331; Rap GTPase activating protein domain IPR027107; Tuberin/Ral GTPase-activating protein subunit alpha	NA
LOCMI01053	6.56336	7.66697	5.75651	5.70985	4.77015	6.21099	Phosphatidylinositol 4-kinase alpha	PI4KA	Phosphatidylinositol 4-kinase alpha, putative [Pediculus humanus corporis] gb|EEB20254.1| Phosphatidylinositol 4-kinase alpha, putative [Pediculus humanus corporis]	Phosphatidylinositol 4-kinase alpha OS=Homo sapiens GN=PI4KA PE=1 SV=3	Phosphatidylinositol 4-kinase alpha, putative OS=Pediculus humanus subsp. corporis GN=Phum_PHUM607950 PE=4 SV=1	COG5032|Phosphatidylinositol kinase and protein kinases of the PI-3 kinase family|TDBLU|Signal transduction mechanisms ; Cell cycle control, cell division, chromosome partitioning ; Chromatin structure and dynamics ; Replication, recombination and repair ; Intracellular trafficking, secretion, and vesicular transport ;	GO:0005488; binding; Molecular Function GO:0016772; transferase activity, transferring phosphorus-containing groups; Molecular Function GO:0016773; phosphotransferase activity, alcohol group as acceptor; Molecular Function GO:0046854; phosphatidylinositol phosphorylation; Biological Process GO:0048015; phosphatidylinositol-mediated signaling; Biological Process	IPR000403; Phosphatidylinositol 3-/4-kinase, catalytic domain IPR001263; Phosphoinositide 3-kinase, accessory (PIK) domain IPR011009; Protein kinase-like domain IPR015433; Phosphatidylinositol Kinase IPR016024; Armadillo-type fold IPR018936; Phosphatidylinositol 3/4-kinase, conserved site	K00888 PI4K; phosphatidylinositol 4-kinase [EC:2.7.1.67] [EC:2.7.1.67] Metabolism; Carbohydrate metabolism; Inositol phosphate metabolism [PATH:ko00562] Environmental Information Processing; Signal transduction; Phosphatidylinositol signaling system [PATH:ko04070]
LOCMI01054	0	0	1.5017	0	0	0.321258	GJ22060	LOCMI01054	GJ22060 [Drosophila virilis] gb|EDW61463.1| GJ22060 [Drosophila virilis]	NA	GJ22060 OS=Drosophila virilis GN=Dvir\GJ22060 PE=4 SV=1	NA	NA	NA	NA
LOCMI01055	1.04633	0.901996	0	0	0	0	LOCMI01055	LOCMI01055	LOCMI01055	LOCMI01055	LOCMI01055	LOCMI01055	LOCMI01055	LOCMI01055	LOCMI01055
LOCMI01056	0	0	0	0	0	0	Vesicular glutamate transporter 1	SLC17A7	hypothetical protein YQE_01789, partial [Dendroctonus ponderosae]	Vesicular glutamate transporter 1 OS=Bos taurus GN=SLC17A7 PE=2 SV=1	Uncharacterized protein (Fragment) OS=Dendroctonus ponderosae GN=YQE_01789 PE=4 SV=1	COG0477|Permeases of the major facilitator superfamily|GEPR|Carbohydrate transport and metabolism ; Amino acid transport and metabolism ; Inorganic ion transport and metabolism ; General function prediction only ;	GO:0016021; integral component of membrane; Cellular Component GO:0055085; transmembrane transport; Biological Process	IPR011701; Major facilitator superfamily IPR016196; Major facilitator superfamily domain, general substrate transporter IPR020846; Major facilitator superfamily domain	NA
LOCMI01059	32.3412	40.8905	42.9236	56.5159	51.4495	61.3603	LOCMI01059	LOCMI01059	LOCMI01059	LOCMI01059	LOCMI01059	LOCMI01059	LOCMI01059	LOCMI01059	LOCMI01059
LOCMI01060	0.285363	0.901996	1.25142	3.02972	2.61223	2.03463	Anoctamin	LOCMI01060	PREDICTED: uncharacterized protein LOC101887915 [Musca domestica]	NA	Anoctamin OS=Aedes aegypti GN=AAEL004982 PE=3 SV=1	NA	NA	NA	NA
LOCMI01062	5.13654	0.450998	0.75085	0	0.908601	0	LOCMI01062	LOCMI01062	LOCMI01062	LOCMI01062	LOCMI01062	LOCMI01062	LOCMI01062	LOCMI01062	LOCMI01062
LOCMI01063	1.23658	0	0.500566	0	0.340725	1.07086	LOCMI01063	LOCMI01063	LOCMI01063	LOCMI01063	LOCMI01063	LOCMI01063	LOCMI01063	LOCMI01063	LOCMI01063
LOCMI01064	2.18779	1.80399	2.00227	1.98097	1.70363	2.03463	Strumpellin	Strumpellin	Strumpellin [Zootermopsis nevadensis]	WASH complex subunit strumpellin OS=Xenopus tropicalis PE=2 SV=1	Uncharacterized protein OS=Strigamia maritima PE=4 SV=1	NA	GO:0071203; WASH complex; Cellular Component	IPR019393; WASH complex, subunit strumpellin	K18464
LOCMI01065	70.0092	91.5526	58.1908	53.7192	51.1088	34.4817	Probable complex I intermediate-associated protein 30, mitochondrial	nuaf-1	putative complex I intermediate-associated protein 30, mitochondrial [Zootermopsis nevadensis]	Probable complex I intermediate-associated protein 30, mitochondrial OS=Drosophila melanogaster GN=CG7598 PE=2 SV=1	Putative motochondrial complex i intermediate-associated protein 30 cia30 OS=Rhodnius prolixus PE=2 SV=1	NA	NA	IPR008979; Galactose-binding domain-like IPR013857; NADH:ubiquinone oxidoreductase intermediate-associated protein 30	K18159
LOCMI01066	0	0	0	0	0.908601	0	LOCMI01066	LOCMI01066	LOCMI01066	LOCMI01066	LOCMI01066	LOCMI01066	LOCMI01066	LOCMI01066	LOCMI01066
LOCMI01067	29.4876	29.9162	25.654	41.95	31.006	37.373	Programmed cell death protein 10	pdcd10	Programmed cell death protein 10 [Zootermopsis nevadensis]	Programmed cell death protein 10 OS=Xenopus laevis GN=pdcd10 PE=2 SV=1	Putative apoptosis related protein OS=Rhodnius prolixus PE=2 SV=1	NA	NA	IPR009652; Protein of unknown function DUF1241	K18269
LOCMI01070	0.190242	0	0.875991	0.233055	0.4543	0	Putative epidermal cell surface receptor	sas	hypothetical protein KGM_22517 [Danaus plexippus]	Putative epidermal cell surface receptor OS=Drosophila melanogaster GN=sas PE=2 SV=2	Uncharacterized protein OS=Bombyx mori PE=4 SV=1	NA	NA	NA	NA
LOCMI01071	0	0	0	0	0	0	Sulfate transporter 4.1, chloroplastic	SULTR4_1	Sodium-independent sulfate anion transporter [Zootermopsis nevadensis]	Sulfate transporter 4.1, chloroplastic OS=Arabidopsis thaliana GN=SULTR4;1 PE=1 SV=1	Uncharacterized protein OS=Apis mellifera PE=4 SV=1	COG0659|Sulfate permease and related transporters (MFS superfamily)|P|Inorganic ion transport and metabolism ;	GO:0008272; sulfate transport; Biological Process GO:0015116; sulfate transmembrane transporter activity; Molecular Function GO:0016021; integral component of membrane; Cellular Component	IPR011547; Sulphate transporter	NA
LOCMI01073	8.94139	12.4776	11.513	8.62305	11.0168	10.0661	Putative uncharacterized protein	LOCMI01073	hypothetical protein L798_02590 [Zootermopsis nevadensis]	NA	Putative uncharacterized protein OS=Pediculus humanus subsp. corporis GN=Phum_PHUM138270 PE=4 SV=1	NA	GO:0032007; negative regulation of TOR signaling; Biological Process GO:0048011; neurotrophin TRK receptor signaling pathway; Biological Process	IPR026682; AKT1 substrate 1 protein	NA
LOCMI01074	0	0	0	0	0	0	Vesicular glutamate transporter 2	SLC17A6	PREDICTED: vesicular glutamate transporter 3-like [Megachile rotundata]	Vesicular glutamate transporter 2 OS=Bos taurus GN=SLC17A6 PE=2 SV=1	Vesicular glutamate transporter 1 OS=Camponotus floridanus GN=EAG_11361 PE=4 SV=1	NA	GO:0016021; integral component of membrane; Cellular Component GO:0055085; transmembrane transport; Biological Process	IPR011701; Major facilitator superfamily IPR016196; Major facilitator superfamily domain, general substrate transporter	NA
LOCMI01075	2.75851	3.30732	3.37882	5.01069	2.2715	3.64093	Probable ATP-dependent RNA helicase DDX10	Ddx10	putative ATP-dependent RNA helicase DDX10 [Zootermopsis nevadensis]	Probable ATP-dependent RNA helicase DDX10 OS=Mus musculus GN=Ddx10 PE=1 SV=2	Putative DEAD/DEAH box helicase OS=Trichinella spiralis GN=Tsp_07169 PE=4 SV=1	COG0513|Superfamily II DNA and RNA helicases|LKJ|Replication, recombination and repair ; Transcription ; Translation, ribosomal structure and biogenesis ;	GO:0003676; nucleic acid binding; Molecular Function GO:0005524; ATP binding; Molecular Function GO:0008026; ATP-dependent helicase activity; Molecular Function	IPR011545; DNA/RNA helicase, DEAD/DEAH box type, N-terminal IPR014014; RNA helicase, DEAD-box type, Q motif IPR027417; P-loop containing nucleoside triphosphate hydrolase	NA
LOCMI01076	0.475606	0.300665	0.625708	1.86444	0.567875	0.53543	Beta-glucuronidase	Gusb	PREDICTED: beta-glucuronidase isoform X1 [Acyrthosiphon pisum]	Beta-glucuronidase OS=Mus musculus GN=Gusb PE=2 SV=2	Uncharacterized protein OS=Acyrthosiphon pisum GN=LOC100168343 PE=4 SV=1	COG3250|Beta-galactosidase/beta-glucuronidase|G|Carbohydrate transport and metabolism ;	GO:0004553; hydrolase activity, hydrolyzing O-glycosyl compounds; Molecular Function GO:0005975; carbohydrate metabolic process; Biological Process	IPR006104; Glycosyl hydrolases family 2, sugar binding domain IPR008979; Galactose-binding domain-like	NA
LOCMI01078	0	0	0	0	0	0	LOCMI01078	LOCMI01078	LOCMI01078	LOCMI01078	LOCMI01078	LOCMI01078	LOCMI01078	LOCMI01078	LOCMI01078
LOCMI01079	97.0236	114.103	80.9666	166.518	162.299	149.171	Eukaryotic translation initiation factor 5A	eIF-5A	Eukaryotic translation initiation factor 5A, partial [Zootermopsis nevadensis]	Eukaryotic translation initiation factor 5A OS=Spodoptera frugiperda GN=eIF-5A PE=2 SV=1	Uncharacterized protein OS=Nasonia vitripennis PE=4 SV=1	COG0231|Translation elongation factor P (EF-P)/translation initiation factor 5A (eIF-5A)|J|Translation, ribosomal structure and biogenesis ;	GO:0003723; RNA binding; Molecular Function GO:0003746; translation elongation factor activity; Molecular Function GO:0006452; translational frameshifting; Biological Process GO:0008612; peptidyl-lysine modification to peptidyl-hypusine; Biological Process GO:0043022; ribosome binding; Molecular Function GO:0045901; positive regulation of translational elongation; Biological Process GO:0045905; p…	IPR001884; Translation elongation factor IF5A IPR008991; Translation protein SH3-like domain IPR014722; Ribosomal protein L2 domain 2 IPR019769; Translation elongation factor, IF5A, hypusine site	K03263
LOCMI01085	0.570727	0.901996	0.375425	0.699166	1.13575	0	Chondroitin sulfate proteoglycan 4, putative (Fragment)	LOCMI01085	hypothetical protein L798_12112, partial [Zootermopsis nevadensis]	NA	Chondroitin sulfate proteoglycan 4, putative (Fragment) OS=Pediculus humanus subsp. corporis GN=Phum_PHUM210160 PE=4 SV=1	NA	NA	NA	NA
LOCMI01086	3.23412	1.05233	4.25481	1.98097	3.06653	3.31967	Protein-cysteine N-palmitoyltransferase Rasp	LOCMI01086	Protein-cysteine N-palmitoyltransferase Rasp [Zootermopsis nevadensis]	NA	NA	NA	NA	NA	NA
LOCMI01088	21.212	19.0923	36.7916	37.2888	48.0423	25.9148	Phosphatidylethanolamine-binding protein homolog F40A3.3	F40A3.3	Phosphatidylethanolamine-binding protein 1 [Zootermopsis nevadensis]	Phosphatidylethanolamine-binding protein homolog F40A3.3 OS=Caenorhabditis elegans GN=F40A3.3 PE=3 SV=1	Putative phosphatidylethanolamine-binding protein OS=Corethrella appendiculata PE=2 SV=1	COG1881|Phospholipid-binding protein|R|General function prediction only ;	NA	IPR008914; Phosphatidylethanolamine-binding protein PEBP	NA
LOCMI01089	305.149	296.907	429.611	305.302	396.377	395.897	Polyubiquitin-A	ubq-1	polyubiquitin [Caenorhabditis elegans]	Polyubiquitin-A OS=Caenorhabditis elegans GN=ubq-1 PE=3 SV=1	Uncharacterized protein OS=Caenorhabditis japonica GN=WBGene00125269 PE=4 SV=2	COG5272|Ubiquitin|O|Posttranslational modification, protein turnover, chaperones ;	GO:0005515; protein binding; Molecular Function	IPR000626; Ubiquitin domain IPR019954; Ubiquitin conserved site IPR019956; Ubiquitin	K08770 UBC; ubiquitin C K08770 Organismal Systems; Endocrine system; PPAR signaling pathway [PATH:ko03320]
LOCMI01091	0.475606	0.150333	0.875991	0.582638	0.4543	0.53543	Guanine nucleotide exchange factor DBS, partial	MCF2L	Guanine nucleotide exchange factor DBS, partial [Zootermopsis nevadensis]	NA	Putative uncharacterized protein OS=Tribolium castaneum GN=TcasGA2_TC004695 PE=4 SV=1	NA	NA	NA	NA
LOCMI01092	0	0	0.500566	0	0	0.428344	Ras-related protein Rab-8A	RAB8A	hypothetical protein SINV_09491 [Solenopsis invicta]	Ras-related protein Rab-8A OS=Gallus gallus GN=RAB8A PE=2 SV=1	Putative uncharacterized protein (Fragment) OS=Solenopsis invicta GN=SINV_09491 PE=3 SV=1	COG1100|GTPase SAR1 and related small G proteins|R|General function prediction only ;	GO:0005525; GTP binding; Molecular Function GO:0007264; small GTPase mediated signal transduction; Biological Process GO:0015031; protein transport; Biological Process	IPR001806; Small GTPase superfamily IPR003579; Small GTPase superfamily, Rab type IPR027417; P-loop containing nucleoside triphosphate hydrolase	NA
LOCMI01093	4.56582	2.70599	0	0.466111	25.3272	1.17795	LOCMI01093	LOCMI01093	LOCMI01093	LOCMI01093	LOCMI01093	LOCMI01093	LOCMI01093	LOCMI01093	LOCMI01093
LOCMI01094	2.28291	2.85632	4.5051	3.61236	0.22715	1.82046	Tetratricopeptide repeat protein 17	TTC17	Tetratricopeptide repeat protein 17 [Zootermopsis nevadensis]	NA	Putative uncharacterized protein GLEAN_08239 OS=Tribolium castaneum GN=GLEAN_08239 PE=4 SV=1	NA	NA	NA	NA
LOCMI01096	1.23658	0.450998	1.12627	2.44708	2.2715	1.4992	C3 and PZP-like alpha-2-macroglobulin domain-containing protein 8	CPAMD8	CD109 antigen, partial [Zootermopsis nevadensis]	C3 and PZP-like alpha-2-macroglobulin domain-containing protein 8 OS=Homo sapiens GN=CPAMD8 PE=1 SV=2	Uncharacterized protein OS=Apis mellifera GN=TEPA PE=4 SV=1	NA	GO:0005576; extracellular region; Cellular Component GO:0005615; extracellular space; Cellular Component	IPR008930; Terpenoid cyclases/protein prenyltransferase alpha-alpha toroid IPR009048; Alpha-macroglobulin, receptor-binding IPR011626; Alpha-macroglobulin complement component	NA
LOCMI01097	13.6023	4.05898	8.50963	16.6635	11.5847	9.42357	Glucose-induced degradation protein 4 homolog	GID4	hypothetical protein AND_005398 [Anopheles darlingi]	Glucose-induced degradation protein 4 homolog OS=Homo sapiens GN=GID4 PE=2 SV=1	Uncharacterized protein OS=Anopheles darlingi GN=AND_005398 PE=4 SV=1	COG5073|Vacuolar import and degradation protein|U|Intracellular trafficking, secretion, and vesicular transport ;	NA	IPR018618; Vacuolar import/degradation protein Vid24	NA
LOCMI01098	0	0	0	0.699166	0	0	Probable multidrug resistance-associated protein lethal(2)03659	ABCC2	hypothetical protein TcasGA2_TC014403 [Tribolium castaneum]	Probable multidrug resistance-associated protein lethal(2)03659 OS=Drosophila melanogaster GN=l(2)03659 PE=2 SV=3	Putative uncharacterized protein OS=Tribolium castaneum GN=TcasGA2_TC014403 PE=3 SV=1	COG1132|ABC-type multidrug transport system, ATPase and permease components|V|Defense mechanisms ;	NA	IPR027417; P-loop containing nucleoside triphosphate hydrolase	NA
LOCMI01100	0	0	0	0.233055	1.8172	0.107086	Lactase-phlorizin hydrolase	LCT	Chain A, Crystal Structure Of Beta-Glucosidase From Termite Neotermes Koshunensis In Complex With Tris pdb|3VIF|A Chain A, Crystal Structure Of Beta-glucosidase From Termite Neotermes Koshunensis In Complex With Gluconolactone pdb|3VIG|A Chain A, Crystal Structure Of Beta-glucosidase From Termite Neotermes Koshunensis In Complex With 1-deoxynojirimycin pdb|3VIH|A Chain A, Crystal Structure Of Bet…	Lactase-phlorizin hydrolase OS=Oryctolagus cuniculus GN=LCT PE=1 SV=1	Beta-glucosidase (Precursor) OS=Neotermes koshunensis GN=NkBG PE=1 SV=1	COG2723|Beta-glucosidase/6-phospho-beta-glucosidase/beta-galactosidase|G|Carbohydrate transport and metabolism ;	GO:0004553; hydrolase activity, hydrolyzing O-glycosyl compounds; Molecular Function GO:0005975; carbohydrate metabolic process; Biological Process	IPR001360; Glycoside hydrolase, family 1 IPR013781; Glycoside hydrolase, catalytic domain IPR017853; Glycoside hydrolase, superfamily	NA
LOCMI01101	1.23658	1.35299	1.87712	2.91319	1.13575	0.53543	Ecdysteroid UDP-glucosyltransferase	EGT	UDP-glucuronosyltransferase 2B1 [Zootermopsis nevadensis]	Ecdysteroid UDP-glucosyltransferase OS=Mamestra brassicae nuclear polyhedrosis virus GN=EGT PE=3 SV=1	Uncharacterized protein OS=Acyrthosiphon pisum GN=LOC100160380 PE=3 SV=1	NA	GO:0008152; metabolic process; Biological Process GO:0016758; transferase activity, transferring hexosyl groups; Molecular Function	IPR002213; UDP-glucuronosyl/UDP-glucosyltransferase	NA
LOCMI01102	0.380485	0	0	1.63139	0.4543	0.428344	Proline-rich nuclear receptor coactivator 2	PNRC2	Proline-rich nuclear receptor coactivator 2 [Zootermopsis nevadensis]	NA	Proline-rich nuclear receptor coactivator, putative OS=Pediculus humanus subsp. corporis GN=Phum_PHUM353060 PE=4 SV=1	NA	NA	IPR026780; Proline-rich nuclear receptor coactivator 1/2 IPR028322; Proline-rich nuclear receptor coactivator	NA
LOCMI01103	15.7901	21.9486	25.4037	27.0344	6.92808	14.4566	Alpha-aminoadipic semialdehyde synthase, mitochondrial	Aass	aminoadipic semialdehyde synthase, putative [Pediculus humanus corporis] gb|EEB10070.1| aminoadipic semialdehyde synthase, putative [Pediculus humanus corporis]	Alpha-aminoadipic semialdehyde synthase, mitochondrial OS=Rattus norvegicus GN=Aass PE=2 SV=1	Aminoadipic semialdehyde synthase, putative OS=Pediculus humanus subsp. corporis GN=Phum_PHUM016080 PE=4 SV=1	NA	NA	IPR007698; Alanine dehydrogenase/PNT, NAD(H)-binding domain	K14157 AASS; alpha-aminoadipic semialdehyde synthase [EC:1.5.1.8 1.5.1.9] [EC:1.5.1.8 1.5.1.9] Metabolism; Amino acid metabolism; Lysine degradation [PATH:ko00310]
LOCMI01104	0.570727	0.901996	1.25142	0.466111	1.13575	0.642516	GPI mannosyltransferase 3	pigb	phosphatidylinositol glycan, class B [Tribolium castaneum]	GPI mannosyltransferase 3 OS=Danio rerio GN=pigb PE=2 SV=1	Putative uncharacterized protein OS=Tribolium castaneum GN=TcasGA2_TC000759 PE=4 SV=1	NA	GO:0016757; transferase activity, transferring glycosyl groups; Molecular Function	IPR005599; GPI mannosyltransferase	K05286 PIGB; phosphatidylinositol glycan, class B [EC:2.4.1.-] [EC:2.4.1.-] Metabolism; Glycan biosynthesis and metabolism; Glycosylphosphatidylinositol(GPI)-anchor biosynthesis [PATH:ko00563]
LOCMI01105	5.99263	5.26165	4.63024	6.64208	4.42943	3.1055	ATP-dependent RNA helicase A	DHX9	Dosage compensation regulator [Zootermopsis nevadensis]	ATP-dependent RNA helicase A OS=Pongo abelii GN=DHX9 PE=2 SV=1	Dosage compensation regulator OS=Acromyrmex echinatior GN=G5I_01098 PE=4 SV=1	NA	NA	NA	K13184
LOCMI01107	0.285363	0	0	0	0.340725	0.321258	Plasma kallikrein	Klkb1	GH24792 [Drosophila grimshawi] gb|EDV92221.1| GH24792 [Drosophila grimshawi]	Plasma kallikrein OS=Mus musculus GN=Klkb1 PE=1 SV=2	Putative trypsin-like serine protease OS=Corethrella appendiculata PE=2 SV=1	COG5640|Secreted trypsin-like serine protease|O|Posttranslational modification, protein turnover, chaperones ;	GO:0003824; catalytic activity; Molecular Function GO:0004252; serine-type endopeptidase activity; Molecular Function GO:0006508; proteolysis; Biological Process	IPR001254; Peptidase S1 IPR009003; Trypsin-like cysteine/serine peptidase domain IPR018114; Peptidase S1, trypsin family, active site	NA
LOCMI01111	2.47315	2.25499	4.00453	2.79666	2.7258	2.57007	Sorting nexin-17	snx17	Sorting nexin-17 [Zootermopsis nevadensis]	Sorting nexin-17 OS=Danio rerio GN=snx17 PE=2 SV=1	Uncharacterized protein OS=Rhodnius prolixus PE=4 SV=1	NA	NA	IPR019748; FERM central domain	K17929
LOCMI01112	3.99509	3.00665	6.0068	6.29249	7.7231	4.49761	Inositol polyphosphate multikinase	IPMK	Inositol polyphosphate multikinase [Zootermopsis nevadensis]	NA	Putative uncharacterized protein OS=Tribolium castaneum GN=TcasGA2_TC005770 PE=4 SV=1	NA	GO:0008440; inositol-1,4,5-trisphosphate 3-kinase activity; Molecular Function	IPR005522; Inositol polyphosphate kinase	K00328 IPMK; inositol-polyphosphate multikinase [EC:2.7.1.151] [EC:2.7.1.151] Metabolism; Carbohydrate metabolism; Inositol phosphate metabolism [PATH:ko00562]
LOCMI01113	3.04388	2.70599	2.25255	2.79666	2.83938	2.67715	Major facilitator superfamily domain-containing protein 6	MFSD6	Major facilitator superfamily domain-containing protein 6 [Zootermopsis nevadensis]	NA	Uncharacterized protein OS=Nasonia vitripennis PE=4 SV=1	NA	NA	NA	NA
LOCMI01116	343.863	460.018	291.955	155.914	143.672	118.116	Reactive oxygen species modulator 1	romo1	reactive oxygen species modulator 1-like protein [Microplitis demolitor]	Reactive oxygen species modulator 1 OS=Xenopus tropicalis GN=romo1 PE=3 SV=1	Putative uncharacterized protein OS=Amblyomma maculatum PE=2 SV=1	NA	NA	IPR018450; Reactive oxygen species modulator 1	NA
LOCMI01117	265.959	105.834	71.8313	18.6444	240.438	52.258	LOCMI01117	LOCMI01117	LOCMI01117	LOCMI01117	LOCMI01117	LOCMI01117	LOCMI01117	LOCMI01117	LOCMI01117
LOCMI01118	0.665848	1.50333	1.25142	2.33055	19.0806	0.856688	Tankyrase-1	TNKS	Chain A, Crystal Structure Of Engineered Protein. Northeast Structural Genomics Consortium Target Or266. pdb|4GMR|B Chain B, Crystal Structure Of Engineered Protein. Northeast Structural Genomics Consortium Target Or266.	Tankyrase-1 OS=Homo sapiens GN=TNKS PE=1 SV=2	Ankyrin repeat domain protein OS=Hydrogenivirga sp. 128-5-R1-1 GN=HG1285_13567 PE=4 SV=1	COG0666|FOG: Ankyrin repeat|R|General function prediction only ;	GO:0005515; protein binding; Molecular Function	IPR002110; Ankyrin repeat IPR020683; Ankyrin repeat-containing domain	NA
LOCMI01119	14.4584	14.7326	24.4026	7.5743	3.86155	4.71179	UDP-glucuronosyltransferase 1-6	Ugt1a6	UDP-glucuronosyltransferase 2B1, partial [Zootermopsis nevadensis]	UDP-glucuronosyltransferase 1-6 OS=Mus musculus GN=Ugt1a6 PE=1 SV=1	Glucosyl/glucuronosyl transferase (Fragment) OS=Coptotermes formosanus PE=2 SV=1	NA	GO:0008152; metabolic process; Biological Process GO:0016758; transferase activity, transferring hexosyl groups; Molecular Function	IPR002213; UDP-glucuronosyl/UDP-glucosyltransferase	NA
LOCMI01120	0	0.601331	0	0	0	0.214172	PREDICTED: rotatin-like isoform 1	rotatin	PREDICTED: rotatin-like isoform 1 [Bombus terrestris] ref|XP_003394152.1| PREDICTED: rotatin-like isoform 2 [Bombus terrestris]	NA	NA	NA	NA	NA	NA
LOCMI01122	2.85363	4.20932	6.0068	5.36027	5.4516	5.99682	Cleavage stimulation factor subunit 2	Cstf2	Cleavage stimulation factor 64 kDa subunit [Zootermopsis nevadensis]	Cleavage stimulation factor subunit 2 OS=Mus musculus GN=Cstf2 PE=1 SV=2	Uncharacterized protein OS=Apis mellifera PE=4 SV=1	NA	GO:0000166; nucleotide binding; Molecular Function GO:0003676; nucleic acid binding; Molecular Function	IPR000504; RNA recognition motif domain IPR012677; Nucleotide-binding, alpha-beta plait IPR025742; Cleavage stimulation factor subunit 2, hinge domain	K14407 CSTF2, RNA15; cleavage stimulation factor subunit 2 K14407 Genetic Information Processing; Translation; mRNA surveillance pathway [PATH:ko03015]
LOCMI01123	14.1731	11.275	16.5187	73.6455	38.7291	33.4108	Cystatin-C	Cst3	PREDICTED: cystatin-C-like [Erinaceus europaeus]	Cystatin-C OS=Mus musculus GN=Cst3 PE=2 SV=2	Uncharacterized protein OS=Ailuropoda melanoleuca GN=LOC100468639 PE=4 SV=1	NA	GO:0004869; cysteine-type endopeptidase inhibitor activity; Molecular Function	IPR000010; Proteinase inhibitor I25, cystatin IPR018073; Proteinase inhibitor I25, cystatin, conserved site IPR027214; Cystatin	K13899 CST3; cystatin-C K13899 Organismal Systems; Digestive system; Salivary secretion [PATH:ko04970]
LOCMI01125	1.14145	0	0.875991	0.582638	0.22715	0.214172	E3 ubiquitin-protein ligase UHRF1	UHRF1	PREDICTED: E3 ubiquitin-protein ligase UHRF1 [Myotis davidii] gb|ELK37430.1| E3 ubiquitin-protein ligase UHRF1 [Myotis davidii]	E3 ubiquitin-protein ligase UHRF1 OS=Homo sapiens GN=UHRF1 PE=1 SV=1	E3 ubiquitin-protein ligase UHRF1 OS=Myotis davidii GN=MDA_GLEAN10011086 PE=4 SV=1	NA	GO:0005515; protein binding; Molecular Function	IPR000626; Ubiquitin domain IPR019956; Ubiquitin	NA
LOCMI01127	9.41699	6.16364	7.63364	8.8561	8.40456	7.7102	Zinc finger transcription factor family protein 17	ztf-17	conserved hypothetical protein [Pediculus humanus corporis] gb|EEB11695.1| conserved hypothetical protein [Pediculus humanus corporis]	Zinc finger transcription factor family protein 17 OS=Caenorhabditis elegans GN=ztf-17 PE=1 SV=3	Putative uncharacterized protein OS=Pediculus humanus subsp. corporis GN=Phum_PHUM129180 PE=4 SV=1	NA	NA	NA	NA
LOCMI01128	0	0	0	0	0	0	Vesicular glutamate transporter 3	Slc17a8	sodium-dependent phosphate transporter [Culex quinquefasciatus] gb|EDS33626.1| sodium-dependent phosphate transporter [Culex quinquefasciatus]	Vesicular glutamate transporter 3 OS=Mus musculus GN=Slc17a8 PE=2 SV=1	Sodium-dependent phosphate transporter OS=Culex quinquefasciatus GN=CpipJ_CPIJ010134 PE=4 SV=1	NA	GO:0016021; integral component of membrane; Cellular Component GO:0055085; transmembrane transport; Biological Process	IPR011701; Major facilitator superfamily IPR016196; Major facilitator superfamily domain, general substrate transporter	NA
LOCMI01130	2.56827	2.55566	3.75425	1.74791	2.15793	2.89132	LOCMI01130	LOCMI01130	LOCMI01130	LOCMI01130	LOCMI01130	LOCMI01130	LOCMI01130	LOCMI01130	LOCMI01130
LOCMI01132	3.99509	5.56231	3.87939	4.195	4.0887	5.3543	HIV Tat-specific factor 1-like protein	HTATSF1	HIV Tat-specific factor 1-like protein [Zootermopsis nevadensis]	NA	Uncharacterized protein OS=Nasonia vitripennis PE=4 SV=1	NA	NA	NA	K13093
LOCMI01133	0	0.450998	0	0	0	0	ATP-binding cassette sub-family A member 2	ABCA2	PREDICTED: ATP-binding cassette sub-family A member 1-like [Aplysia californica]	ATP-binding cassette sub-family A member 2 OS=Homo sapiens GN=ABCA2 PE=1 SV=3	Uncharacterized protein OS=Monodelphis domestica GN=ABCA2 PE=3 SV=2	COG1131|ABC-type multidrug transport system, ATPase component|V|Defense mechanisms ;	GO:0005524; ATP binding; Molecular Function GO:0016887; ATPase activity; Molecular Function	IPR003439; ABC transporter-like IPR026082; ABC transporter A, ABCA IPR027417; P-loop containing nucleoside triphosphate hydrolase	NA
LOCMI01134	0	0	0.375425	0	0	0	Putative uncharacterized protein (Fragment)	LOCMI01134	hypothetical protein DAPPUDRAFT_71228 [Daphnia pulex] gb|EFX60780.1| hypothetical protein DAPPUDRAFT_70636 [Daphnia pulex]	NA	Putative uncharacterized protein (Fragment) OS=Daphnia pulex GN=DAPPUDRAFT_70636 PE=4 SV=1	NA	NA	NA	NA
LOCMI01136	0.570727	0.450998	0	0.699166	1.3629	0	LOCMI01136	LOCMI01136	LOCMI01136	LOCMI01136	LOCMI01136	LOCMI01136	LOCMI01136	LOCMI01136	LOCMI01136
LOCMI01138	0.760969	0.450998	1.00113	0.815694	0.567875	0.856688	Bifunctional protein NCOAT	Mgea5	Bifunctional protein NCOAT [Zootermopsis nevadensis]	Bifunctional protein NCOAT OS=Mus musculus GN=Mgea5 PE=1 SV=2	Uncharacterized protein OS=Atta cephalotes PE=4 SV=1	NA	NA	IPR011496; Beta-N-acetylglucosaminidase IPR017853; Glycoside hydrolase, superfamily	K15719
LOCMI01139	8.37066	8.2683	10.8873	8.27346	9.08601	9.2094	Glutathione S-transferase C-terminal domain-containing protein homolog	GSTCD	Glutathione S-transferase C-terminal domain-containing protein-like protein [Zootermopsis nevadensis]	Glutathione S-transferase C-terminal domain-containing protein homolog OS=Drosophila melanogaster GN=CG10428 PE=2 SV=2	Uncharacterized protein OS=Nasonia vitripennis PE=4 SV=1	COG0500|SAM-dependent methyltransferases|QR|Secondary metabolites biosynthesis, transport and catabolism ; General function prediction only ;	NA	IPR010987; Glutathione S-transferase, C-terminal-like IPR025714; Methyltransferase domain	NA
LOCMI01140	1.52194	2.10466	2.00227	4.77763	4.65658	1.71338	Notchless protein homolog 1	NLE1	Notchless protein-like protein 1 [Zootermopsis nevadensis]	Notchless protein homolog 1 OS=Bos taurus GN=NLE1 PE=2 SV=3	Uncharacterized protein (Fragment) OS=Takifugu rubripes GN=LOC101077005 PE=4 SV=1	COG2319|FOG: WD40 repeat|R|General function prediction only ;	GO:0005515; protein binding; Molecular Function	IPR001680; WD40 repeat IPR015943; WD40/YVTN repeat-like-containing domain IPR017986; WD40-repeat-containing domain IPR019775; WD40 repeat, conserved site	NA
LOCMI01141	1.14145	1.65366	1.00113	0.815694	1.02218	1.07086	Dedicator of cytokinesis protein 1	DOCK1	hypothetical protein L798_12707, partial [Zootermopsis nevadensis]	Dedicator of cytokinesis protein 1 OS=Homo sapiens GN=DOCK1 PE=1 SV=2	Dedicator of cytokinesis protein 1 OS=Camponotus floridanus GN=EAG_05313 PE=4 SV=1	NA	GO:0005085; guanyl-nucleotide exchange factor activity; Molecular Function GO:0005488; binding; Molecular Function GO:0005515; protein binding; Molecular Function GO:0007264; small GTPase mediated signal transduction; Biological Process	IPR001452; Src homology-3 domain IPR010703; Dedicator of cytokinesis C-terminal IPR016024; Armadillo-type fold IPR026791; Dedicator of cytokinesis IPR026799; Dedicator of cytokinesis protein 2 IPR027007; DHR-1 domain IPR027357; DHR-2 domain	K13708 DOCK1; dedicator of cytokinesis protein 1 K13708 Cellular Processes; Cell motility; Regulation of actin cytoskeleton [PATH:ko04810] Cellular Processes; Cell communication; Focal adhesion [PATH:ko04510] Human Diseases; Infectious diseases; Shigellosis [PATH:ko05131] Human Diseases; Infectious diseases; Bacterial invasion of epithelial cells [PATH:ko05100]
LOCMI01142	1.99754	0.601331	0.625708	2.0975	2.83938	2.14172	ATP-binding cassette sub-family C member Sur	Sur	cGMP-dependent protein kinase, isozyme 1, partial [Zootermopsis nevadensis]	ATP-binding cassette sub-family C member Sur OS=Drosophila melanogaster GN=Sur PE=1 SV=4	Uncharacterized protein OS=Rhodnius prolixus PE=3 SV=1	COG1132|ABC-type multidrug transport system, ATPase and permease components|V|Defense mechanisms ;	GO:0000166; nucleotide binding; Molecular Function GO:0005524; ATP binding; Molecular Function GO:0016887; ATPase activity; Molecular Function GO:0017111; nucleoside-triphosphatase activity; Molecular Function	IPR003439; ABC transporter-like IPR003593; AAA+ ATPase domain IPR017871; ABC transporter, conserved site IPR027417; P-loop containing nucleoside triphosphate hydrolase	NA
LOCMI01144	1.99754	2.25499	5.13081	2.56361	3.1801	3.42675	Organic cation transporter protein	Orct	organic cation transporter protein [Culex quinquefasciatus] gb|EDS31256.1| organic cation transporter protein [Culex quinquefasciatus]	Organic cation transporter protein OS=Drosophila melanogaster GN=Orct PE=1 SV=1	Organic cation transporter protein OS=Culex quinquefasciatus GN=CpipJ_CPIJ001657 PE=4 SV=1	COG0477|Permeases of the major facilitator superfamily|GEPR|Carbohydrate transport and metabolism ; Amino acid transport and metabolism ; Inorganic ion transport and metabolism ; General function prediction only ;	GO:0016021; integral component of membrane; Cellular Component GO:0022857; transmembrane transporter activity; Molecular Function GO:0055085; transmembrane transport; Biological Process	IPR005828; General substrate transporter IPR016196; Major facilitator superfamily domain, general substrate transporter IPR020846; Major facilitator superfamily domain	NA
LOCMI01145	0	0	0	0	0	0.642516	Synaptotagmin-2	SYT2	Synaptotagmin-9, partial [Zootermopsis nevadensis]	Synaptotagmin-2 OS=Homo sapiens GN=SYT2 PE=1 SV=2	Putative uncharacterized protein GLEAN_07583 OS=Tribolium castaneum GN=GLEAN_07583 PE=4 SV=1	NA	GO:0005515; protein binding; Molecular Function	IPR000008; C2 domain	NA
LOCMI01146	25.0169	18.6413	34.1637	24.7039	39.5241	48.4029	Midnolin	MIDN	hypothetical protein L798_03692, partial [Zootermopsis nevadensis]	Midnolin OS=Homo sapiens GN=MIDN PE=2 SV=2	Midnolin OS=Apis cerana GN=ACCB00140.2 PE=2 SV=1	NA	GO:0005515; protein binding; Molecular Function	IPR000626; Ubiquitin domain	NA
LOCMI01147	0	0	0	0	0	0	Alpha-(1,3)-fucosyltransferase 7	Fut7	PREDICTED: glycoprotein 3-alpha-L-fucosyltransferase A-like [Megachile rotundata]	Alpha-(1,3)-fucosyltransferase 7 OS=Mus musculus GN=Fut7 PE=2 SV=1	Glycoprotein 3-alpha-L-fucosyltransferase A OS=Acromyrmex echinatior GN=G5I_09221 PE=3 SV=1	NA	GO:0006486; protein glycosylation; Biological Process GO:0008417; fucosyltransferase activity; Molecular Function GO:0016020; membrane; Cellular Component	IPR001503; Glycosyl transferase, family 10	NA
LOCMI01148	0	0	0.375425	1.63139	0.908601	0	NA	LOCMI01148	PREDICTED: uncharacterized protein LOC103307928 [Acyrthosiphon pisum]	NA	Uncharacterized protein OS=Acyrthosiphon pisum PE=4 SV=1	NA	NA	NA	NA
LOCMI01150	0	0	0	0	0	0.428344	OBP6 protein	OBP	OBP6 protein [Locusta migratoria]	NA	OBP6 protein (Fragment) OS=Locusta migratoria GN=OBP6 PE=2 SV=1	NA	NA	NA	NA
LOCMI01151	99.2114	105.985	108.498	109.419	86.2035	78.1728	Transmembrane emp24 domain-containing protein bai	bai	EMP24 domain-containing protein [Coptotermes formosanus]	Transmembrane emp24 domain-containing protein bai OS=Drosophila grimshawi GN=bai PE=3 SV=2	EMP24 domain-containing protein OS=Coptotermes formosanus PE=2 SV=1	NA	GO:0006810; transport; Biological Process GO:0016021; integral component of membrane; Cellular Component	IPR009038; GOLD	NA
LOCMI01152	6.56336	4.66031	3.75425	5.94291	6.58735	8.35271	Bifunctional glutamate/proline--tRNA ligase	Aats-glupro	hypothetical protein D910_07359 [Dendroctonus ponderosae]	Bifunctional glutamate/proline--tRNA ligase OS=Drosophila melanogaster GN=Aats-glupro PE=1 SV=2	Uncharacterized protein OS=Dendroctonus ponderosae GN=D910_07359 PE=3 SV=1	COG0442|Prolyl-tRNA synthetase|J|Translation, ribosomal structure and biogenesis ;	GO:0004827; proline-tRNA ligase activity; Molecular Function GO:0005524; ATP binding; Molecular Function GO:0005737; cytoplasm; Cellular Component GO:0006433; prolyl-tRNA aminoacylation; Biological Process	IPR004154; Anticodon-binding IPR004499; Proline-tRNA ligase, class IIa, archaeal-type IPR009068; S15/NS1, RNA-binding	K01881 PARS, proS; prolyl-tRNA synthetase [EC:6.1.1.15] [EC:6.1.1.15] Genetic Information Processing; Translation; Ribosome [BR:ko03011] Genetic Information Processing; Translation; Transfer RNA biogenesis [BR:ko03016] Genetic Information Processing; Translation; Aminoacyl-tRNA biosynthesis [PATH:ko00970]
LOCMI01153	7.89506	6.16364	8.38449	7.34124	9.88103	12.9574	LOCMI01153	LOCMI01153	LOCMI01153	LOCMI01153	LOCMI01153	LOCMI01153	LOCMI01153	LOCMI01153	LOCMI01153
[truncated: 12,204 more rows]

## Sheet: source data for E and G
Fig 4E				Fig 4G
				Gene	dsGFP1	dsGFP2	dsGFP3	dsGFP4	dsFABP1	dsFABP2	dsFABP3	dsFABP4
[truncated: 9 more rows]
