# Supplementary material for: FUNCTIONALIZED POLYMERIC MEMBRANES FOR BIOSEPARATION AND BIOCATALYSIS
Source: eLife journal article supplement (doi:10.7554/elife.65279), 2007-01-01
Supplement: supp [file elife-65279-supp-v1.zip › elife_poa_e65279_Figure_5_figure_supplement_1.pdf]

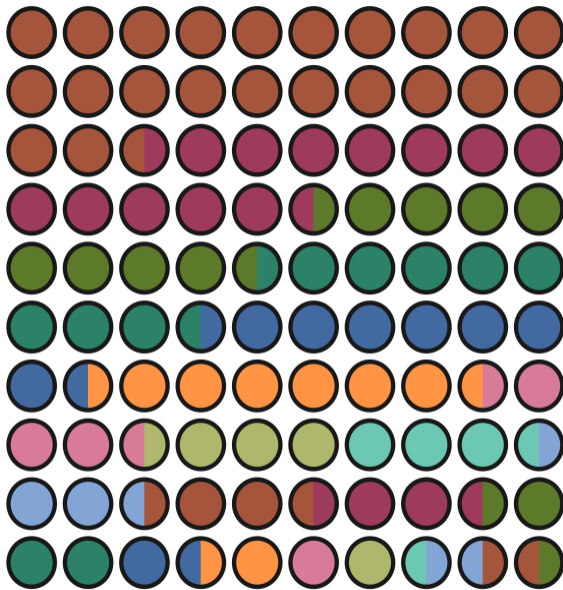

N=881

- Triacylglycerols
- Glycerophosphocholines
- Glycerophosphoethanolamines
- Amino Acids
- Unannotated
- Carbohydrates
- Organic Acids
- Acylcarnitines
- Fatty Acids
- Sphingolipids
- Nucleotides
- Cardiolipins
- Diacylglycerols
- Glycerophosphoinositols
- Glycerophosphoglycerols
- Glycerophosphoserines
- Cofactors
- Peptides
- Vitamins
- Exogenous
- Purine
- Choline
- Wax monoesters
