# Supplementary material for: FUNCTIONALIZED POLYMERIC MEMBRANES FOR BIOSEPARATION AND BIOCATALYSIS
Source: eLife journal article supplement (doi:10.7554/elife.65279), 2007-01-01
Supplement: supp [file elife-65279-supp-v1.zip › elife_poa_e65279_Figure_5_source_data_1.xlsx]

## Sheet: source data for metabolics
NUM	Class	Metabolites	HMDB/LipidMAPS/PubChem	KEGG	Metabolic Pathway	mass accuracy(PPM)	ACP_1	ACP_2	ACP_3	ACP_5	ACP_6	ACP_7	WT_1	WT_2	WT_4	WT_5	WT_6	WT_7	CV% in QCs	Log2(Fold Change ACP/WT)	Fold Change ACP/WT	p-value of t-test	FDR adjusted p-value of t-test	0-Log10(FDR adjusted p-value of t-test)	VIP value of OPLS-DA modeling
up-regulated
877	Glycerophosphoserines	PS(36:3)_PS(18:0/18:3)	HMDB0112373		Phosphatidylcholine Biosynthesis	-0.13	19.8623	19.4707	19.8708	19.027	19.4065	19.3444	19.0849	18.6427	19.034	19.3628	18.7701	19.3474	0.0183436	0.456624	1.37233	0.028577	0.12402	0.906508	1.43561
872	Glycerophosphoinositols	PI(35:3)_PI(17:0/18:3)	LMGP06010202		Glycerophospholipid metabolism	2.17	17.8417	17.9616	17.9218	18.1301	18.0587	18.3864	17.0066	17.5762	17.7178	18.0061	17.7384	17.6844	0.0391704	0.428469	1.3458	0.021534	0.10658	0.972324	1.1578
842	Cardiolipins	CL(70:9)_CL(18:3/16:0/18:3/18:3)			Cardiolipin Biosynthesis	1.01	20.8048	21.0594	20.9653	20.7558	21.1087	20.3668	20.2548	20.1824	20.1074	20.2965	20.3801	20.8569	0.00542408	0.497116	1.41139	0.0096102	0.06463	1.18957	1.4306
624	Sphingolipids	SM(d32:1)_SM(d32:1)	HMDB0012097		Sphingolipid Metabolism	0.77	22.6713	22.022	22.7179	22.1282	22.2738	22.2342	22.3277	21.4112	22.0563	22.2929	21.6394	21.4893	0.00980451	0.471776	1.38682	0.04339	0.15995	0.796016	1.10835
537	Glycerophosphoethanolamines	PE(35:4)_PE(17:1/18:3)	LMGP02010575		Phosphatidylethanolamine Biosynthesis	1.18	21.0511	20.9952	21.1066	20.8935	21.179	20.8417	20.8085	20.9317	20.4215	20.7694	20.8185	20.8127	0.0137243	0.250805	1.18987	0.017485	0.093025	1.0314	1.29949
534	Glycerophosphoethanolamines	PE(36:5)_PE(16:1/20:4)	HMDB0009386		Phosphatidylethanolamine Biosynthesis	-1.64	26.1148	26.1487	26.1356	25.9478	26.2259	26.3549	25.3512	25.5259	25.6065	26.1398	25.9322	25.7109	0.0246497	0.443524	1.35992	0.00627	0.052608	1.27895	1.10269
531	Glycerophosphoethanolamines	PE(36:5)_PE(18:3/18:2)	HMDB0009126		Phosphatidylethanolamine Biosynthesis	-1.64	26.1148	26.1487	26.1356	25.9478	26.2259	26.3549	25.3512	25.5259	25.6065	26.1398	25.9322	25.7109	0.0246497	0.443524	1.35992	0.00627	0.052608	1.27895	1.10269
530	Glycerophosphoethanolamines	PE(36:6)_PE(18:3/18:3)	HMDB0009160		Phosphatidylethanolamine Biosynthesis	-0.7	23.2394	23.354	23.3501	23.7735	23.8646	23.6657	22.2198	22.1407	22.45	23.0073	22.5112	22.9589	0.0180186	0.993228	1.99063	0.00028564	0.0146	1.83565	1.59749
497	Glycerophosphocholines	PC(36:3)_PC(18:0/18:3)	HMDB0008168		Glycerophospholipid metabolism	-0.07	29.5018	29.2313	29.5256	29.0415	29.2451	29.271	28.9446	29.1055	28.8757	29.2684	28.8758	29.1806	0.0212359	0.260953	1.19827	0.027844	0.12242	0.912148	1.14614
468	Glycerophosphocholines	PC(35:4)_PC(17:1/18:3)	LMGP01011534		map00564 Glycerophospholipid metabolism	1.5	24.4391	24.4058	24.4709	24.3379	24.5171	24.2329	24.1337	24.478	23.8583	24.2125	24.0957	24.3	0.00938268	0.220897	1.16546	0.042769	0.15899	0.79863	0.969742
463	Glycerophosphocholines	PC(36:5)_PC(18:3/18:2)	HMDB0008204		Glycerophospholipid metabolism	-1.03	28.8348	28.8957	28.8505	28.6318	28.9267	29.0201	28.1554	28.5054	28.2072	28.8427	28.5038	28.6022	0.00919665	0.390521	1.31087	0.0075908	0.056698	1.24643	0.957238
458	Glycerophosphocholines	PC(36:6)_PC(18:3/18:3)	HMDB0008172		Glycerophospholipid metabolism	-0.21	26.3576	26.4874	26.4197	26.8426	27.0795	26.7296	25.3827	25.3969	25.3859	26.0054	25.4891	26.0996	0.0136445	1.02612	2.03654	0.00018256	0.013403	1.8728	1.61467
405	Unannotated	X-M3-MZ231.09864RT502.8				1.69	18.7897	20.1501	19.0227	20.0186	19.6265	19.2825	16.7295	19.6121	18.6134	17.3075	16.4072	16.8186	0.0206333	1.9003	3.73291	0.0069142	0.055885	1.2527	1.61819
387	Unannotated	X-M3-MZ144.06662RT361.2				3.6	21.3649	21.951	21.0633	21.8918	21.294	21.5522	19.8152	20.6851	20.6826	19.5898	18.9744	19.3848	0.0544199	1.66421	3.1694	0.00039111	0.016897	1.77219	1.7668
385	Unannotated	X-M3-MZ144.06662RT346.2				4.13	19.9348	20.7025	19.5241	20.6498	19.7409	20.1029	17.2113	18.696	19.1948	17.852	16.7257	16.5987	0.0946934	2.39607	5.26368	0.00051093	0.016897	1.77219	1.76097
373	Organic Acids	Oxoglutaric acid	HMDB0000208	C00026	map00020 Citrate cycle (TCA cycle)	4.85	24.6592	25.115	25.3128	25.2004	25.0233	25.227	24.2837	24.1196	23.9028	25.1727	23.0872	24.1694	0.0405695	0.967062	1.95486	0.0075899	0.056698	1.24643	1.41781
366	Amino Acids	3-Aminoisobutanoic acid	HMDB0003911	C05145		4.14	23.4747	24.5117	23.3372	24.1843	24.2146	24.2332	21.0741	23.5251	23.4035	21.5878	20.2001	20.242	0.0396977	2.32054	4.9952	0.0044602	0.043247	1.36404	1.64073
363	Amino Acids	2-Oxoarginine	HMDB0004225	C03771	map00330 Arginine and proline metabolism	4.04	21.4368	21.6184	21.6098	21.6198	21.8802	21.2621	21.1531	21.1471	21.2593	21.0916	21.3857	21.284	0.147435	0.35106	1.2755	0.004334	0.043247	1.36404	1.64378
331	Organic Acids	cis-Aconitic acid	HMDB0000072	C00417	map00020 Citrate cycle (TCA cycle)	3.06	20.4488	20.0326	20.7115	20.7156	20.6144	20.5418	20.2225	19.9391	19.7437	20.0675	20.3939	18.8089	0.0169709	0.648172	1.56718	0.02792	0.12242	0.912148	0.908228
326	Organic Acids	Succinic acid	HMDB0000254	C00042	map00020 Citrate cycle (TCA cycle)	4.33	23.6575	23.168	23.6375	23.5247	23.4893	23.5674	23.1331	23.1364	22.8185	23.3294	22.9359	23.0708	0.01042	0.436748	1.35355	0.0016989	0.027718	1.55724	1.67719
307	Nucleotides	Guanosine diphosphate	HMDB0001201	C00035	map00230 Purine metabolism	2.16	18.8313	18.886	18.9278	18.6244	18.6864	18.7241	18.7274	18.5525	18.1287	18.6317	18.6508	18.5751	0.0284148	0.23562	1.17741	0.039741	0.15222	0.817528	1.27107
306	Nucleotides	Adenosine triphosphate	HMDB0000538	C00002	map00190 Oxidative phosphorylation	1.07	20.4244	19.836	19.8054	19.6526	19.4846	18.9714	19.344	18.7007	18.5272	18.7834	18.9911	18.9066	0.074122	0.820241	1.7657	0.0045635	0.043701	1.35951	1.59779
303	Nucleotides	ADP	HMDB0001341	C00008	map00190 Oxidative phosphorylation	1.97	24.1788	24.1072	24.0994	24.0873	24.0714	23.9448	23.9282	23.7824	23.6187	23.5786	23.86	23.5827	0.0224795	0.356388	1.28022	0.00045187	0.016897	1.77219	1.81366
238	Amino Acids	L-Arginine	HMDB0000517	C00062	map00220 Arginine biosynthesis	2.82	27.4012	27.4649	27.4733	27.3512	27.6025	27.2869	27.2666	27.2157	27.1025	27.338	27.2405	27.4058	0.00781846	0.168494	1.12388	0.021335	0.10658	0.972324	1.36411
237	Amino Acids	Ornithine	HMDB0000214	C00077	map00220 Arginine biosynthesis	3.69	25.4532	25.4025	25.5287	25.4262	25.5657	25.2915	25.1856	25.1365	25.2179	25.3822	25.1904	25.4057	0.00166935	0.19159	1.14202	0.010155	0.066765	1.17545	1.50919
216	Organic Acids	4-Vinylphenol sulfate	HMDB0062775			2.76	22.5362	19.5973	22.3738	21.0773	20.924	22.1004	20.0238	19.0576	19.2282	19.2547	20.0694	20.3254	0.0467003	1.77498	3.42234	0.0058309	0.050862	1.29361	1.47574
108	Peptides	Val-Asp	HMDB0029123			-0.7	21.2586	21.9665	21.164	22.0346	21.7576	21.6802	20.3932	21.6885	21.2949	20.1505	20.0257	20.4863	0.0428929	0.970399	1.95938	0.010597	0.068864	1.16201	1.50261
103	Nucleotides	3'-O-Methylguanosine	HMDB0006038			-1.15	21.5875	17.5569	21.3876	18.9086	17.9323	17.6546	17.2728	16.922	16.264	17.7083	16.8746	17.0816	0.0367025	2.15072	4.44049	0.020631	0.10453	0.980759	1.35892
97	Nucleotides	Cytidine	HMDB0000089	C00475	map00240 Pyrimidine metabolism	-1.11	19.5	20.7358	20.2165	19.9611	19.8125	19.6995	18.0397	17.2284	18.6055	18.3528	17.9739	17.1265	0.0491866	2.09974	4.28631	3.9713e-05	0.0049981	2.3012	1.70672
66	Amino Acids	4-Guanidinobutanoic acid	HMDB0003464	C01035	map00330 Arginine and proline metabolism	-1.1	21.6707	22.7328	22.3064	22.467	22.446	21.8175	21.1164	21.5213	22.0351	21.9761	21.7727	21.6735	0.023975	0.557561	1.47178	0.02735	0.12242	0.912148	1.32213
21	Cofactors	NAD	HMDB0000902	C00003	map00190 Oxidative phosphorylation	-1.85	20.9398	22.6402	21.7345	21.8842	21.6416	21.1522	21.2107	20.7665	20.4936	20.3455	20.9389	19.7221	0.0331526	1.08586	2.12264	0.0073248	0.056698	1.24643	1.63083
down-regulated
413	Cofactors	Coenzyme Q10	HMDB0001072	C11378	map04216 Ferroptosis	1.01	25.9392	26.2549	26.0644	26.0604	26.1244	26.1086	26.368	26.4528	26.1467	26.2799	26.3263	26.3307	0.00461891	-0.225398	0.855359	0.0034431	0.037449	1.42656	1.55239
881	Glycerophosphoserines	PS(36:1)_PS(18:0/18:1)	HMDB0112289		Glycerophospholipid metabolism	3.29	17.2934	16.6601	17.0149	15.9175	15.7418	16.9696	17.2082	17.2195	17.2706	17.5367	16.7518	17.6152	0.0443195	-0.66745	0.629619	0.041832	0.15773	0.802086	1.19964
874	Glycerophosphoinositols	PI(34:1)_PI(16:0/18:1)	HMDB0009783		Glycerophospholipid metabolism	3.34	16.9101	15.8902	17.0381	15.5129	15.6028	16.5398	17.3262	17.7411	17.1458	17.2272	17.3923	17.2629	0.054469	-1.10028	0.466427	0.0032006	0.03662	1.43628	1.48152
868	Glycerophosphoglycerols	PG(36:1)_PG(18:0/18:1)	HMDB0010603		Cardiolipin Biosynthesis	3.75	15.0804	13.0992	15.1757	13.8761	13.5195	12.7525	16.5292	17.0114	15.45	16.176	15.7461	15.7029	0.0652397	-2.18533	0.219862	0.0010206	0.020909	1.67967	1.48264
866	Glycerophosphoglycerols	PG(34:1)_PG(16:0/18:1)	HMDB0010615		Cardiolipin Biosynthesis	0.85	18.2094	17.687	18.0698	16.8721	17.2099	17.374	19.3313	19.9576	18.8413	18.9915	19.2285	18.8137	0.0284035	-1.6236	0.324524	0.00014451	0.012732	1.8951	1.57941
864	Glycerophosphoglycerols	PG(36:3)_PG(18:0/18:3)	HMDB0010606		Cardiolipin Biosynthesis	2.49	20.7414	20.7151	20.7742	20.2273	20.8428	20.5645	20.9531	21.4662	20.6564	21.2583	20.7424	21.1488	0.0234686	-0.393301	0.761386	0.031014	0.13011	0.885689	1.14199
863	Glycerophosphoglycerols	PG(36:3)_PG(18:1/18:2)	HMDB0010620		Cardiolipin Biosynthesis	-0.28	17.7985	16.8551	17.6903	16.8651	16.7781	17.1505	18.0632	18.4995	17.473	18.0112	17.9533	17.8003	0.0340915	-0.777138	0.583523	0.0068875	0.055885	1.2527	1.36451
862	Glycerophosphoglycerols	PG(34:2)_PG(16:0/18:2)	HMDB0010575		Cardiolipin Biosynthesis	0.64	19.5461	19.4664	19.5063	18.2726	18.7653	19.2965	20.1319	21.2445	20.2303	20.6114	20.9579	20.0054	0.0239154	-1.38804	0.382083	0.00076454	0.01951	1.70974	1.65082
861	Glycerophosphoglycerols	PG(34:2)_PG(16:1/18:1)	HMDB0010588		Cardiolipin Biosynthesis	0.64	19.5461	19.4664	19.5063	18.2726	18.7653	19.2965	20.1319	21.2445	20.2303	20.6114	20.9579	20.0054	0.0239154	-1.38804	0.382083	0.00076454	0.01951	1.70974	1.65082
860	Glycerophosphoglycerols	PG(36:4)_PG(18:1/18:3)	HMDB0010636		Cardiolipin Biosynthesis	-0.01	19.1286	18.529	19.167	18.5734	19.0394	18.9291	19.1412	19.6493	19.1794	19.3607	19.1726	19.5906	0.0240542	-0.45454	0.729743	0.010829	0.069636	1.15717	1.37175
859	Glycerophosphoglycerols	PG(34:3)_PG(16:0/18:3)	HMDB0010576		Cardiolipin Biosynthesis	0.11	23.0894	23.3046	23.2492	22.7385	23.0931	23.155	23.3756	23.3971	23.1129	23.4258	23.2231	23.458	0.0382235	-0.227108	0.854346	0.042562	0.15889	0.798903	0.851165
853	Cardiolipins	CL(72:6)_CL(18:2/18:1/18:1/18:2)	HMDB0057991		Cardiolipin Biosynthesis	2.92	15.0962	14.3548	15.01	14.6196	13.5334	14.5875	16.4659	15.626	14.5709	15.24	15.0822	15.0471	0.0580275	-0.805114	0.572317	0.044351	0.16281	0.788319	1.1431
851	Cardiolipins	CL(68:4)_CL(18:1/16:1/16:1/18:1)	HMDB0057565		Cardiolipin Biosynthesis	3.24	15.5503	15.0952	15.3585	14.1534	15.1174	13.6731	15.6836	16.4685	15.6442	15.7336	16.4679	15.4456	0.108604	-1.0826	0.472178	0.0119	0.073491	1.13377	1.12372
835	Triacylglycerols	TG(60:1)_TG(18:0/18:1/24:0)	HMDB0044941		Triglyceride metabolism	1.73	15.5339	15.3976	15.8582	15.276	15.3456	15.9776	16.4597	15.8434	16.6317	16.1155	16.4367	16.0453	0.0768346	-0.690562	0.619612	0.0023091	0.03274	1.48492	1.13021
834	Triacylglycerols	TG(59:1)_TG(15:0/22:1/22:0)	HMDB0043341		Triglyceride metabolism	2.28	16.079	15.9111	16.2329	15.9328	15.9726	16.3235	16.5327	16.1946	16.6614	16.4337	16.8573	16.4654	0.030212	-0.448859	0.732622	0.0029113	0.035623	1.44827	1.03015
832	Triacylglycerols	TG(58:1)_TG(16:0/18:1/24:0)	HMDB0044113		Triglyceride metabolism	2.53	17.534	17.1578	17.7049	17.0757	17.1331	17.905	18.1381	17.4307	18.0255	17.6968	18.1918	17.6865	0.0548389	-0.443154	0.735525	0.040038	0.15255	0.816588	0.997065
831	Triacylglycerols	TG(60:2)_TG(18:0/18:2/24:0)mixture	HMDB0045076		Triglyceride metabolism	2.31	16.5534	16.2636	16.6807	16.0559	16.3721	16.6415	17.0416	17.0027	16.8105	16.8276	17.2207	16.7075	0.0586609	-0.507233	0.70357	0.0023412	0.03274	1.48492	1.29195
829	Triacylglycerols	TG(58:2)_TG(18:1/18:1/22:0)	HMDB0046510		Triglyceride metabolism	2.75	17.9104	17.6373	18.0732	17.5812	17.4574	18.4657	18.6479	18.1096	18.4449	18.3128	18.6086	18.3586	0.0297673	-0.559558	0.67851	0.0091958	0.063785	1.19528	1.03755
827	Triacylglycerols	TG(56:1)_TG(18:0/18:1/20:0)	HMDB0044912		Triglyceride metabolism	3.18	21.5064	20.25	21.6951	20.4645	20.9805	21.9236	22.3601	21.3929	22.1923	21.7805	22.1953	21.8636	0.00738462	-0.827431	0.563532	0.025023	0.11937	0.923105	1.10037
826	Triacylglycerols	TG(58:2)_TG(16:0/18:2/24:0)	HMDB0044253		Triglyceride metabolism	2.75	17.9192	17.6373	18.0732	17.5812	17.4576	18.4657	18.6457	18.1093	18.4233	18.3397	18.6086	18.3162	0.0318392	-0.551436	0.682341	0.00997	0.066485	1.17728	1.02521
820	Triacylglycerols	TG(52:0)_TG(18:0/16:0/18:0)	HMDB0044722		Triglyceride metabolism	0.13	22.2	20.6269	22.4999	20.9359	22.2542	21.9773	23.8664	22.2425	23.371	21.9988	22.8908	22.6658	0.00836483	-1.0902	0.469697	0.028239	0.12316	0.90953	1.17677
818	Triacylglycerols	TG(56:2)_TG(20:0/18:1/18:1)/TG(18:0/18:2/20:0)	HMDB0045743	C00422	map00561 Glycerolipid metabolism	-0.98	22.6817	21.4168	22.8719	21.8926	22.1229	22.9626	23.9265	23.0119	23.5233	23.6833	23.9479	23.661	0.0129042	-1.30091	0.405871	0.0010881	0.021786	1.66182	1.25654
811	Triacylglycerols	TG(51:0)_TG(18:0/16:0/17:0)	HMDB0108587		Triglyceride metabolism	3.47	15.3457	15.0594	15.616	14.9175	14.8471	15.0888	16.5434	15.0751	16.3158	15.4212	15.7157	15.7369	0.195542	-0.655594	0.634814	0.026757	0.12242	0.912148	1.16849
806	Triacylglycerols	TG(50:0)_TG(18:0/16:0/16:0)	HMDB0108576		Triglyceride metabolism	-1.09	22.9973	21.6499	23.2957	21.9893	23.3195	22.7558	25.2238	23.7705	24.4606	23.5757	24.2737	23.8994	0.025113	-1.5327	0.34563	0.0021961	0.032246	1.49152	1.40653
805	Triacylglycerols	TG(56:3)_TG(18:1/18:1/20:1)	HMDB0049263		Triglyceride metabolism	-1.15	21.4465	20.0434	21.7119	20.934	20.8614	21.5259	22.8118	21.9186	22.0509	22.5895	22.7096	22.6169	0.084978	-1.36236	0.388945	0.00089372	0.020909	1.67967	1.22881
804	Triacylglycerols	TG(52:1)_TG(18:0/16:0/18:1)	HMDB0010431		Triglyceride metabolism	0.44	28.7897	27.0945	29.1871	27.6524	28.3716	28.6023	29.6727	28.834	29.364	29.2195	29.5057	29.0067	0.0171823	-0.984174	0.505515	0.016187	0.087487	1.05806	1.18935
803	Triacylglycerols	TG(54:2)_TG(18:0/18:1/18:1)	HMDB0005403	C00422	map00561 Glycerolipid metabolism	-0.55	28.6601	27.0133	28.9148	27.9406	28.3692	28.7281	29.8071	28.8257	29.1599	29.3728	29.4352	29.3493	0.0171246	-1.05397	0.481641	0.0075941	0.056698	1.24643	1.16189
795	Triacylglycerols	TG(49:0)_TG(16:0/16:0/17:0)	HMDB0104223		Triglyceride metabolism	1.03	19.0008	18.22	19.1484	18.4847	18.7648	18.782	20.1119	19.1268	19.7804	19.2832	19.4533	19.1747	0.0233331	-0.754932	0.592574	0.0048241	0.044289	1.3537	1.35581
790	Triacylglycerols	TG(58:5)_TG(18:1/18:1/22:3)	LMGL03011056		Triglyceride metabolism	1.95	18.5319	17.4624	19.0219	18.0259	17.8415	18.6695	19.8262	18.4186	18.6635	19.0339	19.1059	19.0073	0.0366679	-0.750392	0.594442	0.034675	0.14034	0.852819	1.06109
786	Triacylglycerols	TG(51:1)_TG(15:0/20:0/16:1)	HMDB0043083		Triglyceride metabolism	0.12	20.1888	18.7593	20.5118	18.7622	18.4792	19.6399	20.9778	19.5378	20.6401	20.3938	20.5168	20.2206	0.033032	-0.99093	0.503153	0.03218	0.13436	0.87173	1.25949
784	Triacylglycerols	TG(56:4)_TG(20:0/18:1/18:3)	HMDB0045898		Triglyceride metabolism	-0.47	22.6424	21.095	22.8811	21.7716	21.7167	22.6227	23.5818	22.1339	22.6448	23.0849	23.1553	22.8986	0.0251963	-0.794969	0.576356	0.045977	0.1641	0.784891	1.08545
781	Triacylglycerols	TG(54:3)_TG(18:1/18:1/18:1)	HMDB0049283		Triglyceride metabolism	-0.86	28.4965	27.0411	28.5124	28.092	28.1609	28.5898	29.673	29.148	29.1562	29.6558	29.5827	29.6213	0.0108567	-1.32406	0.399408	0.00043793	0.016897	1.77219	1.29771
780	Triacylglycerols	TG(48:0)_TG(16:0/16:0/16:0)	HMDB0005356		map00561 Glycerolipid metabolism	-1	22.7343	21.7571	22.9501	22.1273	23.0744	22.5572	25.2063	23.8173	24.2231	23.715	24.1149	23.6718	0.00815011	-1.59133	0.331866	0.00046418	0.016897	1.77219	1.50345
779	Triacylglycerols	TG(50:1)_TG(16:0/16:0/18:1)	HMDB0005360		Triglyceride metabolism	-0.28	28.7188	27.2497	29.0149	27.6824	28.2589	28.3585	29.7203	29.0702	29.4004	29.5244	29.7577	28.9772	0.00912928	-1.19451	0.436934	0.0024805	0.033525	1.47463	1.36736
778	Triacylglycerols	TG(52:2)_TG(16:0/18:1/18:1)	HMDB0044089		Triglyceride metabolism	-0.16	29.4492	27.959	29.6194	28.621	28.9261	29.213	30.4578	29.9492	30.0808	30.4526	30.5197	30.1222	0.0136624	-1.29911	0.406378	0.00066423	0.018877	1.72407	1.3787
771	Triacylglycerols	TG(58:6)_TG(16:0/20:2/22:4)	HMDB0044324		Triglyceride metabolism	-0.07	18.8689	17.7685	19.2676	18.2104	18.1647	18.6954	20.1272	18.7653	18.9886	19.3534	19.0873	18.9583	0.0318175	-0.717415	0.608186	0.037295	0.14778	0.830384	1.08082
769	Triacylglycerols	TG(58:6)_TG(18:1/18:1/22:4)	HMDB0049294		Triglyceride metabolism	-0.07	18.8689	17.7685	19.2676	18.2104	18.1647	18.6954	20.1272	18.7653	18.9886	19.3534	19.0873	18.9583	0.0318175	-0.717415	0.608186	0.037295	0.14778	0.830384	1.08082
763	Triacylglycerols	TG(49:1)_TG(15:0/16:0/18:1)	HMDB0043027		Triglyceride metabolism	-0.54	22.7592	21.2575	23.1686	21.8157	21.924	22.229	23.4734	22.406	23.0177	23.015	23.2496	22.6046	0.0250451	-0.768727	0.586935	0.038967	0.15057	0.822262	1.11007
762	Triacylglycerols	TG(49:1)_TG(49:1)			Triglyceride metabolism	-0.54	22.7591	21.2575	23.1686	21.8157	21.924	22.2289	23.4734	22.406	23.0177	23.015	23.2496	22.6046	0.0250451	-0.768767	0.586919	0.038967	0.15057	0.822262	1.11008
756	Triacylglycerols	TG(54:4)_TG(18:1/18:1/18:2)	HMDB0049388		map00561 Glycerolipid metabolism	-0.49	28.5299	26.825	28.7962	27.5298	27.5012	28.3399	29.2032	28.1433	28.4282	28.8648	28.9077	28.6961	0.0225214	-0.786863	0.579603	0.045251	0.16338	0.786801	1.10727
755	Triacylglycerols	TG(52:3)_TG(16:0/18:1/18:2)	HMDB0005384		Triglyceride metabolism	0.29	28.964	27.2345	29.283	27.7681	27.9381	28.6034	29.8267	28.8607	29.1316	29.5556	29.6869	29.208	0.0148165	-1.07975	0.473109	0.012045	0.073491	1.13377	1.2403
754	Triacylglycerols	TG(50:2)_TG(16:0/16:0/18:2)	HMDB0005362		Triglyceride metabolism	-0.32	26.7083	25.3896	27.0997	25.8148	26.298	26.6553	28.1102	26.8879	27.468	27.4134	27.7534	26.9894	0.0228606	-1.10946	0.463469	0.0059066	0.051017	1.29229	1.33459
751	Triacylglycerols	TG(51:3)_TG(16:0/17:0/18:3)	LMGL03010077		Triglyceride metabolism	-1.38	23.5061	22.3592	23.9357	23.229	23.1203	23.3789	24.3288	23.3442	23.9468	23.9643	24.0313	23.7592	0.0155231	-0.640891	0.641317	0.029038	0.12541	0.901668	1.04279
750	Triacylglycerols	TG(50:2)_TG(18:1/14:0/18:1)			Triglyceride metabolism	0.04	27.2324	25.3193	27.5265	25.9762	26.2399	26.5761	28.3949	27.674	27.9199	28.5556	28.7113	27.949	0.00377643	-1.7224	0.303044	0.00095022	0.020909	1.67967	1.31248
749	Triacylglycerols	TG(55:5)_TG(19:1/18:1/18:3)	LMGL03016224		Triglyceride metabolism	-1.09	22.701	21.2164	23.0435	22.0525	21.9421	22.3704	23.4649	22.1527	22.691	23.1589	23.1182	23.0686	0.013591	-0.7214	0.606508	0.048468	0.17012	0.769245	1.03456
748	Triacylglycerols	TG(52:3)_TG(16:1/18:1/18:1)	HMDB0048613		Triglyceride metabolism	0.29	28.964	27.2345	29.283	27.7681	27.9381	28.6034	29.8267	28.8607	29.1316	29.5556	29.6869	29.208	0.0148165	-1.07975	0.473109	0.012045	0.073491	1.13377	1.2403
747	Triacylglycerols	TG(50:2)_TG(16:0/16:1/18:1)	HMDB0005377		Triglyceride metabolism	0.04	27.2324	25.3193	27.5265	25.9762	26.2399	26.576	28.3949	27.674	27.9199	28.5556	28.7113	27.949	0.00377234	-1.72241	0.303043	0.00095022	0.020909	1.67967	1.31248
746	Triacylglycerols	TG(46:0)_TG(16:0/14:0/16:0)	HMDB0010411		Triglyceride metabolism	-0.66	20.9921	20.0767	21.2556	20.4178	21.1549	20.6198	23.5999	22.0528	22.5691	22.2954	22.7125	22.009	0.0234657	-1.78696	0.289782	0.0001591	0.012742	1.89476	1.46535
745	Triacylglycerols	TG(48:1)_TG(16:0/14:0/18:1)	HMDB0010414		Triglyceride metabolism	0.22	26.6835	25.0447	27.0843	25.4838	26.1152	26.0741	28.0172	27.0421	27.5108	27.9064	28.2001	27.1304	0.0121355	-1.55357	0.340667	0.0016281	0.027063	1.56762	1.32537
734	Triacylglycerols	TG(49:2)_TG(15:0/16:0/18:2)	HMDB0043032		Triglyceride metabolism	0.14	22.1735	20.7872	22.5847	21.3083	21.5886	21.9481	23.0932	21.9036	22.4437	22.5797	22.757	22.019	0.0418214	-0.734274	0.60112	0.04467	0.16293	0.787999	1.08412
733	Triacylglycerols	TG(50:3)_TG(16:0/16:0/18:3)	HMDB0010417		Triglyceride metabolism	-0.29	27.8893	26.747	28.1939	27.2998	27.4734	27.65	28.6644	28.0056	28.4206	28.4946	28.7244	28.3914	0.0136152	-0.907932	0.532948	0.0026637	0.033525	1.47463	1.25367
729	Triacylglycerols	TG(52:4)_TG(16:0/18:1/18:3)mixture	HMDB0044123		Triglyceride metabolism	-0.03	29.5372	28.0791	29.8087	28.721	28.7602	29.1807	30.2897	29.394	29.6769	29.9683	30.0778	29.9103	0.00624583	-0.871671	0.546514	0.012265	0.073491	1.13377	1.20287
720	Triacylglycerols	TG(48:2)_TG(16:0/14:0/18:2)	HMDB0010415		Triglyceride metabolism	0.77	24.6455	23.1516	24.9919	23.5797	23.9734	24.2864	25.6845	24.4117	25.1461	25.2637	25.4523	24.7496	0.0505293	-1.01325	0.495428	0.013128	0.075668	1.12109	1.22772
719	Triacylglycerols	TG(50:3)_TG(16:1/16:1/18:1)	HMDB0005433		Triglyceride metabolism	1.08	26.1737	24.3252	26.5192	24.8557	24.9896	25.5281	26.9416	25.7693	26.1666	26.5269	26.7572	26.1084	0.0145175	-0.979766	0.507062	0.029386	0.12629	0.898631	1.17466
715	Triacylglycerols	TG(48:2)_TG(12:0/18:1/18:1)	LMGL03012670		Triglyceride metabolism	0.4	24.5918	22.7269	24.8895	23.3123	23.5884	23.81	25.6263	24.7727	24.8923	25.5821	25.8206	24.9891	0.0383909	-1.46072	0.363311	0.003074	0.035951	1.44429	1.2378
712	Triacylglycerols	TG(46:1)_TG(16:0/12:0/18:1)			Triglyceride metabolism	0.67	24.5386	22.9026	24.8888	23.2807	23.8577	23.8531	25.6691	24.5913	25.0201	25.4957	25.726	24.7577	0.00785004	-1.32308	0.39968	0.004467	0.043247	1.36404	1.25114
710	Triacylglycerols	TG(52:5)_TG(16:0/16:1/20:4)	HMDB0005380	C00422	Triglyceride metabolism	0.56	28.5325	27.2787	28.8979	27.8899	27.8818	28.2605	29.2368	28.2794	28.6545	28.975	28.979	28.7867	0.0580883	-0.69502	0.617701	0.02667	0.12242	0.912148	1.12374
709	Triacylglycerols	TG(48:2)_TG(16:1/14:0/18:1)	HMDB0010421		Triglyceride metabolism	0.4	24.5918	22.7269	24.8895	23.3123	23.5884	23.81	25.6263	24.7727	24.8923	25.5821	25.8206	24.9891	0.0383909	-1.46072	0.363311	0.003074	0.035951	1.44429	1.2378
707	Triacylglycerols	TG(46:1)_TG(16:0/14:0/16:1)	HMDB0042129		Triglyceride metabolism	0.67	24.5386	22.9026	24.8888	23.2807	23.8577	23.8531	25.6691	24.5913	25.0201	25.4957	25.726	24.7577	0.00785004	-1.32308	0.39968	0.004467	0.043247	1.36404	1.25114
706	Triacylglycerols	TG(49:3)_TG(15:0/16:0/18:3)	HMDB0043033		Triglyceride metabolism	-0.34	22.2243	21.0029	22.6032	21.8128	21.7926	21.9962	23.1031	22.1053	22.5542	22.6373	22.8309	22.3946	0.0159886	-0.698876	0.616052	0.022898	0.11084	0.955303	1.05177
705	Triacylglycerols	TG(46:1)_TG(14:0/18:1/14:0)	HMDB0042331		Triglyceride metabolism	0.67	24.5386	22.9026	24.8888	23.2807	23.8577	23.8531	25.6691	24.5913	25.0201	25.4957	25.726	24.7577	0.00785004	-1.32308	0.39968	0.004467	0.043247	1.36404	1.25114
704	Triacylglycerols	TG(44:0)_TG(16:0/14:0/14:0)	HMDB0103926		Triglyceride metabolism	0.49	19.1869	18.523	19.3251	18.8326	19.4108	18.8697	21.3634	19.8811	20.2945	20.1318	20.3718	19.8801	0.0031887	-1.29578	0.407315	0.00061094	0.018442	1.73419	1.36932
702	Triacylglycerols	TG(52:5)_TG(16:0/18:2/18:3)	HMDB0044263		Triglyceride metabolism	0.56	28.5325	27.3603	28.8979	27.8899	27.8818	28.2605	29.2368	28.2794	28.6545	28.975	28.979	28.7867	0.0159479	-0.681422	0.62355	0.025311	0.11937	0.923105	1.13796
695	Triacylglycerols	TG(52:5)_TG(16:1/18:2/18:2)	HMDB0005446	C00422	Triglyceride metabolism	0.56	28.5325	27.3603	28.8979	27.8899	27.8818	28.2605	29.2368	28.2794	28.6545	28.975	28.979	28.7867	0.0159479	-0.681422	0.62355	0.025311	0.11937	0.923105	1.13796
693	Triacylglycerols	TG(48:3)_TG(14:0/18:3/16:0)	HMDB0042543		Triglyceride metabolism	0.88	25.5798	24.2167	25.9317	24.8528	25.0668	25.0777	26.3292	25.3304	25.8753	26.1355	26.3509	25.9013	0.00750012	-0.866191	0.548593	0.013091	0.075668	1.12109	1.12943
692	Triacylglycerols	TG(50:4)_TG(16:0/16:1/18:3)	HMDB0044067		Triglyceride metabolism	0.68	26.8071	25.1264	27.1252	25.736	25.8254	26.1932	27.4448	26.4099	26.7846	27.1571	27.265	26.9364	0.0116273	-0.864098	0.54939	0.02793	0.12242	0.912148	1.14292
690	Triacylglycerols	TG(50:4)_TG(18:2/14:0/18:2)	HMDB0010470		Triglyceride metabolism	0.68	26.8071	25.1264	27.1252	25.736	25.8254	26.1932	27.4448	26.4099	26.7846	27.1571	27.265	26.9364	0.0116273	-0.864098	0.54939	0.02793	0.12242	0.912148	1.14292
687	Triacylglycerols	TG(46:2)_TG(14:0/18:1/14:1)	HMDB0042338		Triglyceride metabolism	2.02	22.2165	20.8515	22.5313	21.0822	21.4271	21.8742	23.1071	21.7484	22.3873	22.5767	22.7986	22.1482	0.0432556	-0.797236	0.57545	0.037575	0.14778	0.830384	1.12868
682	Triacylglycerols	TG(46:2)_TG(16:0/12:0/18:2)	LMGL03013327		Triglyceride metabolism	2.02	22.2165	20.8515	22.5313	21.0822	21.4271	21.8742	23.1071	21.7484	22.3873	22.5767	22.7986	22.1482	0.0432556	-0.797236	0.57545	0.037575	0.14778	0.830384	1.12868
678	Triacylglycerols	TG(46:2)_TG(10:0/18:1/18:1)			Triglyceride metabolism	-0.68	21.8368	20.2151	22.1485	20.6656	21.0428	21.2209	22.9091	22.0405	22.1601	22.8634	23.0983	22.2928	0.0288677	-1.37242	0.386242	0.0026517	0.033525	1.47463	1.21048
677	Triacylglycerols	TG(42:0)_TG(16:0/12:0/14:0)	HMDB0103626		Triglyceride metabolism	0.58	18.6845	18.4713	18.6761	18.1842	18.5752	18.5861	19.4783	18.9396	18.9687	18.8847	18.8725	18.8343	0.0420543	-0.466762	0.723587	0.0038079	0.040419	1.39341	1.26477
675	Triacylglycerols	TG(46:2)_TG(16:1/14:0/16:1)	HMDB0010419		Triglyceride metabolism	-0.68	21.8368	20.2151	22.1485	20.6656	21.0428	21.2209	22.9091	22.0405	22.1601	22.8634	23.0983	22.2928	0.0288677	-1.37242	0.386242	0.0026517	0.033525	1.47463	1.21048
673	Triacylglycerols	TG(44:1)_TG(14:0/16:1/14:0)/TG(16:0/10:0/18:1)	HMDB0042301		Triglyceride metabolism	-0.59	21.896	20.5436	22.1908	20.7404	21.3144	21.3055	23.0524	22.0165	22.352	22.8728	23.115	22.1803	0.0185461	-1.26637	0.415704	0.0029061	0.035623	1.44827	1.24984
667	Triacylglycerols	TG(50:5)_TG(14:0/18:2/18:3)mixture	HMDB0042527		Triglyceride metabolism	1.29	25.2234	24.0092	25.576	24.511	24.6641	24.8208	25.9727	24.953	25.3417	25.7266	25.7346	25.4055	0.0152295	-0.721583	0.606432	0.022886	0.11084	0.955303	1.1034
664	Triacylglycerols	TG(46:3)_TG(14:0/18:2/14:1)	HMDB0042518		Triglyceride metabolism	0.97	23.2252	21.8872	23.6267	22.2855	22.5706	22.5859	23.8435	22.6846	23.166	23.5802	23.686	23.3587	0.0167462	-0.689642	0.620008	0.049575	0.17263	0.762884	1.03757
659	Triacylglycerols	TG(46:3)_TG(16:0/12:0/18:3)			Triglyceride metabolism	0.97	23.2252	21.8872	23.6267	22.2855	22.5706	22.5859	23.8435	22.6846	23.166	23.5802	23.686	23.3587	0.0167462	-0.689642	0.620008	0.049575	0.17263	0.762884	1.03757
655	Triacylglycerols	TG(44:2)_TG(16:0/10:0/18:2)			Triglyceride metabolism	-1.36	19.8331	18.6634	20.1412	18.8194	19.129	19.5364	20.9223	19.6261	20.0465	20.534	20.7019	19.9831	0.0165803	-0.948553	0.518152	0.012346	0.073491	1.13377	1.15575
651	Triacylglycerols	TG(42:1)_TG(14:0/14:1/14:0)	HMDB0042271		Triglyceride metabolism	-0.21	18.3799	17.7885	18.6221	17.7126	18.1353	18.0552	19.6904	18.6891	18.9279	19.4322	19.645	18.8027	0.0238637	-1.08226	0.472287	0.00083183	0.020357	1.69129	1.25628
648	Triacylglycerols	TG(48:5)_TG(12:0/18:2/18:3)	LMGL03013482		Triglyceride metabolism	1.39	22.277	21.153	22.6247	21.5201	21.6747	21.9046	22.9822	21.8062	22.3064	22.7737	22.613	22.4453	0.00760791	-0.628781	0.646723	0.044754	0.16293	0.787999	1.05659
645	Triacylglycerols	TG(44:3)_TG(16:0/10:0/18:3)			Triglyceride metabolism	-0.37	20.298	19.2347	20.6448	19.415	19.6647	19.8872	21.1536	19.7448	20.3666	20.7954	20.7639	20.6202	0.00972535	-0.716724	0.608478	0.034886	0.14034	0.852819	1.05392
644	Triacylglycerols	TG(44:3)_TG(14:1/16:1/14:1)	HMDB0047908		Triglyceride metabolism	-0.37	20.298	19.2347	20.6448	19.415	19.6647	19.8872	21.1536	19.7448	20.3666	20.7954	20.7639	20.6202	0.00972535	-0.716724	0.608478	0.034886	0.14034	0.852819	1.05392
643	Triacylglycerols	TG(46:4)_TG(10:0/18:1/18:3)			Triglyceride metabolism	-1.24	18.9382	18.0581	19.0253	17.5505	18.0953	18.8931	20.2355	18.61	19.1605	19.7217	19.5865	18.8708	0.0298189	-0.937427	0.522163	0.022574	0.11049	0.956677	1.17307
640	Triacylglycerols	TG(46:5)_TG(10:0/18:2/18:3)			Triglyceride metabolism	1.2	19.0583	18.2938	19.3879	18.4958	18.6422	19.0852	20.0001	18.7067	19.3089	19.774	19.565	19.4641	0.0248742	-0.642589	0.640562	0.027073	0.12242	0.912148	1.03331
634	Sphingolipids	SM(d38:1)_SM(d38:1)	HMDB0012102		Sphingolipid Metabolism	3.22	23.0895	22.882	23.1028	22.7106	22.8273	22.7371	23.171	23.1636	23.211	23.2277	23.139	23.2122	0.020989	-0.295877	0.814577	0.0019225	0.029714	1.52704	1.54858
610	Glycerophosphocholines	LPE(16:0)_LPE(16:0)	HMDB0011503		map00564 Glycerophospholipid metabolism	0.39	17.7934	18.1845	18.0417	18.2122	18.0737	18.2974	18.4797	18.5402	18.705	18.5072	18.4351	17.8711	0.0372742	-0.322575	0.799641	0.040171	0.15255	0.816588	1.31843
604	Glycerophosphocholines	LPC(16:1)_LPC(16:1)	HMDB0010383	C04230	map00564 Glycerophospholipid metabolism	-0.36	17.3049	17.7009	17.5831	18.0655	18.0006	18.3099	18.3276	19.3827	19.2626	19.2652	19.8724	17.1508	0.00763046	-1.04938	0.483177	0.034183	0.14007	0.853655	1.24292
597	Glycerophosphoethanolamines	PE(38:2)_PE(20:0/18:2)	LMGP02010669		Phosphatidylethanolamine Biosynthesis	4.11	20.6438	21.0107	20.6437	20.3642	20.469	20.2505	20.9918	20.9801	20.7694	21.0935	20.9707	20.9568	0.0134061	-0.396735	0.759575	0.007047	0.05644	1.24841	1.46998
593	Glycerophosphoethanolamines	PE(36:1)_PE(18:0/18:1)	HMDB0008993		Phosphatidylethanolamine Biosynthesis	3.47	23.6128	23.6454	23.8517	23.2028	22.6558	23.1446	24.1568	24.0724	23.6572	23.7611	24.1296	24.3449	0.059939	-0.668152	0.629312	0.0090768	0.063785	1.19528	1.34963
592	Glycerophosphoethanolamines	PE(38:2)_PE(20:1/18:1)	HMDB0009065		Phosphatidylethanolamine Biosynthesis	2.14	17.1973	16.5271	17.0117	16.4297	15.7402	16.0881	18.377	17.3268	17.0759	16.623	17.3732	17.6979	0.072425	-0.913261	0.530984	0.019758	0.1012	0.994819	1.20281
582	Glycerophosphoethanolamines	PE(37:2)_PE(19:1/18:1)	LMGP02010646		Phosphatidylethanolamine Biosynthesis	3.58	15.3981	15.6667	16.306	16.7344	16.4404	16.0525	17.1923	16.7918	15.9446	16.9534	16.8162	17.4933	0.186613	-0.765605	0.588207	0.026756	0.12242	0.912148	0.957574
581	Glycerophosphoethanolamines	PE(35:1)_PE(17:0/18:1)	LMGP02011211		Phosphatidylethanolamine Biosynthesis	2.74	19.5324	19.6263	19.5137	19.3686	19.067	19.0424	20.2851	20.2863	19.8386	19.7368	20.072	20.0969	0.0101987	-0.694232	0.618038	0.0005057	0.016897	1.77219	1.52215
580	Glycerophosphoethanolamines	PE(34:1p)_PE(34:1p)	HMDB0009048		Phosphatidylethanolamine Biosynthesis	3.64	17.0087	16.0452	16.8076	15.5991	14.9144	16.0599	18.1152	17.9256	17.0158	17.1026	17.0072	17.0779	0.056345	-1.30155	0.405689	0.0062039	0.052608	1.27895	1.4117
574	Glycerophosphoethanolamines	PE(36:2)_PE(18:1/18:1)	HMDB0009059		Phosphatidylethanolamine Biosynthesis	0.65	24.7494	24.4042	24.7009	23.7772	23.5824	23.8627	26.0181	25.4424	24.6307	24.9249	25.065	25.6502	0.0356519	-1.1091	0.463584	0.003522	0.03784	1.42205	1.45843
572	Glycerophosphoethanolamines	PE(34:1)_PE(16:0/18:1)	HMDB0008927		Phosphatidylethanolamine Biosynthesis	1.13	23.2988	22.9264	23.3311	22.4549	22.3443	22.3394	24.6031	24.0615	23.3554	23.5306	23.7248	24.1172	0.0132736	-1.11627	0.461285	0.0018191	0.028619	1.54335	1.48354
563	Glycerophosphoethanolamines	PE(38:4)_PE(20:1/18:3)	HMDB0009259		Phosphatidylethanolamine Biosynthesis	-0.49	21.44	21.5984	21.4124	21.0392	21.4786	21.1805	21.9161	21.7726	21.5556	21.7122	21.6927	21.5098	0.047182	-0.334967	0.792802	0.0092789	0.063785	1.19528	1.17035
560	Glycerophosphoethanolamines	PE(35:2)_PE(17:1/18:1)	LMGP02010572		Phosphatidylethanolamine Biosynthesis	-0.56	19.9907	19.5889	19.8105	18.7709	19.2574	18.9348	20.7034	20.3104	19.5153	19.6748	19.996	20.0929	0.0645286	-0.656599	0.634372	0.032846	0.1365	0.864867	1.15043
558	Glycerophosphoethanolamines	PE(33:1)_PE(17:1/16:0)	LMGP02010567		Phosphatidylethanolamine Biosynthesis	3.18	17.4409	17.1821	17.4828	16.5111	16.9172	16.0828	18.9605	18.728	17.8066	17.9306	18.3635	18.3271	0.131018	-1.41659	0.374596	0.00062799	0.018442	1.73419	1.32781
557	Glycerophosphoethanolamines	PE(36:3)_PE(18:1/18:2)	HMDB0009091		Phosphatidylethanolamine Biosynthesis	0.02	28.1298	28.0004	28.099	27.1694	27.4524	27.6443	28.6541	28.3433	27.8574	28.1177	28.1026	28.226	0.0161971	-0.467622	0.723156	0.036525	0.14627	0.834845	1.26028
555	Glycerophosphoethanolamines	PE(37:4)_PE(19:1/18:3)	LMGP02010808		Phosphatidylethanolamine Biosynthesis	0.51	22.8057	22.6071	22.7983	21.9923	22.4867	22.437	23.5544	23.4863	22.7392	23.1551	23.1726	22.9524	0.0413438	-0.655497	0.634857	0.0040208	0.042171	1.37499	1.2563
549	Glycerophosphoethanolamines	PE(32:1)_PE(16:0/16:1)	HMDB0008924		Phosphatidylethanolamine Biosynthesis	1.86	20.0297	19.6553	19.9234	18.7927	19.0643	19.032	21.895	21.2346	19.9181	20.2447	20.4037	20.3588	0.0205545	-1.2596	0.41766	0.0066486	0.054742	1.26168	1.32283
546	Glycerophosphoethanolamines	PE(30:0)_PE(16:0/14:0)	HMDB0008920		Phosphatidylethanolamine Biosynthesis	1.61	16.4085	16.3413	16.577	15.9273	15.7277	14.8768	18.2009	17.1919	16.907	16.5827	16.5927	16.5325	0.0778157	-1.02488	0.491452	0.018506	0.097045	1.01303	1.08615
533	Glycerophosphoethanolamines	PE(32:2)_PE(16:1/16:1)	HMDB0008957		Phosphatidylethanolamine Biosynthesis	0.84	17.137	17.0138	17.1462	16.2352	16.6272	16.2884	18.5912	18.0897	17.1149	17.615	17.5541	17.1805	0.0341353	-0.949627	0.517766	0.0078129	0.056996	1.24416	1.39649
528	Glycerophosphocholines	PC(38:1)_PC(22:0/16:1)	HMDB0008529		Phosphatidylcholine Biosynthesis	2.5	19.1642	18.9888	19.1832	18.4416	17.8884	19.1042	19.5056	19.4532	19.1302	19.5815	19.2258	20.0338	0.0173517	-0.693316	0.618431	0.019498	0.10097	0.995808	1.33026
527	Glycerophosphocholines	PC(36:1e)_PC(36:1e)	LMGP01020202		Glycerophospholipid metabolism	2.08	18.7827	18.4847	18.7423	18.0803	17.9318	18.8763	19.6883	19.502	18.6951	19.2853	18.8864	19.097	0.0103776	-0.709339	0.6116	0.0095152	0.064484	1.19055	1.31328
524	Glycerophosphocholines	PC(34:1e)_PC(34:1e)			Glycerophospholipid metabolism	1.25	18.8276	18.6638	18.998	18.9655	18.9269	18.4737	19.6019	19.4927	19.7761	19.2039	18.9995	18.8114	0.0470203	-0.504974	0.704673	0.015469	0.08571	1.06697	0.830617
522	Glycerophosphocholines	PC(38:2)_PC(38:2)			Glycerophospholipid metabolism	3.36	21.224	21.2528	21.1218	20.3489	20.4373	20.8314	21.5126	21.3853	21.0715	21.4465	21.1052	21.6078	0.0178691	-0.485462	0.714268	0.025988	0.12114	0.916712	1.30582
521	Glycerophosphocholines	PC(36:2e)_PC(36:2e)	HMDB0013418		Glycerophospholipid metabolism	2.2	22.3455	22.1468	22.3689	21.6836	21.7272	22.5387	22.6695	22.6805	22.3141	22.8299	22.4976	22.3152	0.00364872	-0.416007	0.749496	0.033772	0.13903	0.856891	1.09026
517	Glycerophosphocholines	PC(36:1p)_PC(18:0p/18:1)	HMDB0008127		Phosphatidylcholine Biosynthesis	2.2	22.0593	21.8406	22.102	21.3918	21.5789	22.2286	22.4132	22.3916	22.0363	22.5447	22.2287	22.0367	0.0113923	-0.408344	0.753488	0.026859	0.12242	0.912148	1.1156
515	Glycerophosphocholines	PC(34:0p)_PC(34:0p)	HMDB0011239		Glycerophospholipid metabolism	2.55	18.8419	18.7124	18.9934	18.9384	18.9629	18.6382	19.672	19.5329	19.8347	19.1994	18.9692	18.9352	0.0255097	-0.509361	0.702533	0.011526	0.073051	1.13637	0.801775
513	Glycerophosphocholines	PC(38:3)_PC(18:0/20:3)	HMDB0008046		Glycerophospholipid metabolism	-1.33	21.7044	21.4502	21.5667	20.695	21.025	21.1424	22.4483	22.0946	21.2858	21.8993	21.5073	21.8886	0.0253417	-0.590019	0.664334	0.027668	0.12242	0.912148	1.21404
511	Glycerophosphocholines	PC(34:1p)_PC(34:1p)	HMDB0011210		Glycerophospholipid metabolism	2.59	17.0142	17.603	17.3525	17.403	16.7339	16.9222	17.4557	17.5346	18.1187	17.5633	17.7595	17.5305	0.0650422	-0.488914	0.712561	0.016074	0.087487	1.05806	0.835525
506	Glycerophosphocholines	PC(34:1)_PC(16:0/18:1)	HMDB0007972		Glycerophospholipid metabolism	1.13	28.6501	27.97	28.6219	27.7129	27.6376	27.6966	29.2713	29.0858	28.4558	28.8749	28.759	29.1732	0.0116967	-0.888478	0.540184	0.0029973	0.035951	1.44429	1.43861
505	Glycerophosphocholines	PC(34:2e)_PC(34:2e)	HMDB0011151		Glycerophospholipid metabolism	1.53	18.3851	17.895	18.3811	17.2816	17.4674	18.1214	19.3919	19.5315	18.8868	18.8822	18.8058	18.5596	0.0176456	-1.08773	0.470502	0.001198	0.022456	1.64867	1.38607
501	Glycerophosphocholines	PC(34:1p)_PC(18:0p/16:1)	HMDB0008028	C00157	map00564 Glycerophospholipid metabolism	1.53	18.3851	17.895	18.3811	17.2816	17.4674	18.1214	19.3919	19.5315	18.8868	18.8822	18.8058	18.5596	0.0176456	-1.08773	0.470502	0.001198	0.022456	1.64867	1.38607
494	Glycerophosphocholines	PC(33:1)_PC(17:1/16:0)	HMDB0007939	C00157	map00564 Glycerophospholipid metabolism	0.45	23.2592	22.8384	23.2872	22.4638	22.5165	22.3253	24.0165	24.122	23.292	23.3302	23.4362	23.385	0.00706034	-0.81524	0.568314	0.0049571	0.044289	1.3537	1.25824
486	Glycerophosphocholines	PC(34:2)_PC(16:0/18:2)	HMDB0007973		Glycerophospholipid metabolism	0.52	30.2248	30.0432	30.1775	29.2806	29.6666	29.7189	30.6964	30.6355	29.9626	30.3536	30.2554	29.9845	0.0380959	-0.462715	0.72562	0.039566	0.15222	0.817528	1.19185
483	Glycerophosphocholines	PC(32:1)_PC(16:0/16:1)	HMDB0007969		Glycerophospholipid metabolism	0.16	24.6388	24.0324	24.5721	23.1069	23.428	23.5236	26.1051	25.9766	24.8002	24.9685	25.1095	24.9197	0.021129	-1.42965	0.371222	0.0021401	0.031957	1.49543	1.4181
479	Glycerophosphocholines	PC(30:0)_PC(30:0)	HMDB0007869		Glycerophospholipid metabolism	-0.24	22.6555	22.1434	22.635	21.4917	21.7206	21.4269	23.6645	23.3751	22.7674	22.6573	22.4041	22.3609	0.0227598	-0.859375	0.551191	0.020645	0.10453	0.980759	1.20067
475	Glycerophosphocholines	PC(33:2)_PC(33:2)	HMDB0007940	C00157	map00564 Glycerophospholipid metabolism	2.78	23.0067	23.0499	23.021	22.3021	22.6276	22.6606	23.7798	23.7307	22.9231	23.2775	23.2404	22.8031	0.0408766	-0.514466	0.700052	0.030966	0.13011	0.885689	1.23402
474	Glycerophosphocholines	PC(31:1)_PC(31:1)	HMDB0007936	C00157	map00564 Glycerophospholipid metabolism	-3.12	17.6085	16.8104	17.717	16.6986	16.5876	16.607	19.6422	19.5509	18.1675	17.8744	18.0482	17.386	0.183698	-1.44	0.368568	0.0078281	0.056996	1.24416	1.21436
469	Glycerophosphocholines	PC(29:0)_PC(15:0/14:0)	HMDB0007932		Phosphatidylcholine Biosynthesis	2.26	14.787	14.7936	14.8012	13.4843	13.6495	13.7473	16.2824	15.8649	15.4964	14.8549	14.6985	14.1887	0.0247912	-1.02051	0.492943	0.033649	0.13903	0.856891	1.10033
467	Glycerophosphocholines	PC(32:2)_PC(14:0/18:2)	HMDB0007874		Glycerophospholipid metabolism	1.11	22.9235	22.8	22.8948	21.7141	22.1591	22.1579	23.8281	23.803	22.8452	23.2396	23.0351	22.7028	0.00885545	-0.800709	0.574067	0.017937	0.094627	1.02398	1.36848
464	Glycerophosphocholines	PC(30:1)_PC(16:1/14:0)	HMDB0007998		Phosphatidylcholine Biosynthesis	-0.81	18.667	18.1372	18.6286	16.8932	17.5158	17.547	19.9685	19.8141	18.6164	18.9841	18.7979	18.6978	0.0684335	-1.24833	0.420934	0.0075841	0.056698	1.24643	1.37513
461	Glycerophosphocholines	PC(28:0)_PC(14:0/14:0)	HMDB0007866		Phosphatidylcholine Biosynthesis	-3.05	17.2118	15.7004	16.9923	13.4171	15.0309	14.2299	18.0485	17.657	17.369	17.3195	16.6154	16.8943	0.139723	-1.88689	0.270389	0.01566	0.086225	1.06437	1.31597
416	Acylcarnitines	StearoylcarnitineAcCa(18:0)	HMDB0000848		map01212 Fatty acid metabolism; map00071 Fatty acid degradation	0.44	20.4131	20.4087	20.2978	19.9863	20.6101	20.3171	21.5062	21.2857	20.7703	20.4146	21.0023	20.714	0.00924014	-0.610007	0.655194	0.0077378	0.056996	1.24416	1.31373
415	Acylcarnitines	HeptadecenoylcarnitineAcCa(17:1)			map01212 Fatty acid metabolism; map00071 Fatty acid degradation	1.39	17.1319	17.1437	17.0522	16.8704	17.6733	16.9722	18.5139	18.2567	17.9505	17.0947	18.4609	17.2691	0.00690267	-0.783653	0.580894	0.016926	0.090927	1.04131	1.18643
412	Cofactors	Coenzyme Q9	HMDB0006707	C01967	map00130 Ubiquinone and other terpenoid-quinone biosynthesis	1.22	20.145	20.4596	20.3227	20.4394	20.564	20.853	21.0817	20.8088	20.721	20.7147	20.9574	21.1617	0.0113341	-0.443591	0.735302	0.0049768	0.044289	1.3537	1.59284
398	Unannotated	X-M3-MZ263.07072RT462.6				0.66	19.4902	19.2268	19.504	20.1962	21.2002	20.0242	21.5414	21.9691	21.5224	20.9632	21.3259	21.0348	0.107658	-1.45255	0.365376	0.0013066	0.023022	1.63786	1.52337
393	Unannotated	X-M3-MZ128.03532RT397.8				3.37	23.5173	22.8877	23.6501	23.1713	23.3354	23.583	23.5596	23.8844	23.6222	23.808	23.932	23.8679	0.00892477	-0.421535	0.74663	0.010037	0.066485	1.17728	1.44905
390	Unannotated	X-M3-MZ324.09362RT393				1.81	20.2147	19.7514	20.1092	19.801	20.0848	20.4765	20.7706	20.7606	20.7777	19.9746	21.1405	20.695	0.130911	-0.61356	0.653582	0.0092208	0.063785	1.19528	1.27864
375	Amino Acids	L-Serine	HMDB0000187	C00065	map00260 Glycine, serine and threonine metabolism	4	22.186	22.3566	22.2679	20.5612	21.2182	21.4958	22.8534	21.8119	22.6329	22.2728	23.0622	22.9996	0.0306806	-0.924511	0.526859	0.025388	0.11937	0.923105	1.44699
372	Amino Acids	L-Glutamine	HMDB0000641	C00064	map00220 Arginine biosynthesis	2.34	25.2307	24.8346	25.2983	24.8125	25.4409	25.5464	25.9713	26.2224	25.9262	25.6909	26.6521	26.2248	0.0167787	-0.920698	0.528253	0.00053701	0.016897	1.77219	1.52253
370	Amino Acids	L-Threonine	HMDB0000167	C00188	map00260 Glycine, serine and threonine metabolism	4.67	22.8862	22.8331	23.3215	23.1277	23.771	23.1043	23.6858	24.0339	23.2482	24.2422	23.5716	23.821	0.110163	-0.593158	0.66289	0.014125	0.080285	1.09537	0.924079
362	Amino Acids	L-Proline	HMDB0000162	C00148	map00330 Arginine and proline metabolism	3.57	25.0557	24.5372	24.9536	24.4142	24.4807	24.4976	25.7417	26.0605	24.973	25.8046	25.7185	25.5696	0.0386007	-0.988167	0.504118	0.0003538	0.016405	1.78502	1.70639
360	Amino Acids	Taurine	HMDB0000251	C00245	map00430 Taurine and hypotaurine metabolism	3.22	28.0051	27.9927	27.9405	27.9001	27.9242	28.0166	28.3543	28.1339	28.2977	28.2402	28.1442	28.0243	0.0254402	-0.235909	0.84915	0.0013066	0.023022	1.63786	1.66988
359	Amino Acids	O-Acetylserine	HMDB0003011	C00979	map00270 Cysteine and methionine metabolism	3.68	21.544	21.1457	21.4526	21.3344	21.5406	21.458	21.4491	21.8448	21.7693	21.9514	21.4283	21.54	0.100305	-0.251288	0.840146	0.043302	0.15995	0.796016	1.38706
357	Amino Acids	L-Valine	HMDB0000883	C00183	map00280 Valine, leucine and isoleucine degradation	3.95	24.8793	24.4687	24.7698	24.7229	25.1882	24.5651	25.96	25.9794	25.2634	26.0541	25.5406	25.513	0.0339501	-0.952737	0.516651	0.00020056	0.013592	1.86672	1.71744
352	Amino Acids	L-Leucine	HMDB0000687	C00123	map00280 Valine, leucine and isoleucine degradation	3.33	23.3172	23.244	23.2126	23.5031	24.0103	22.8884	24.8729	24.3401	24.2164	25.4672	24.212	24.8356	0.0599496	-1.29476	0.407604	0.00045829	0.016897	1.77219	1.62503
350	Amino Acids	L-Isoleucine	HMDB0000172	C00407	map00280 Valine, leucine and isoleucine degradation	3.57	22.7172	23.29	22.7818	23.0833	23.1085	21.9655	23.1052	23.7117	23.9948	25.4786	23.8258	24.1055	0.0575609	-1.21256	0.431504	0.0090227	0.063785	1.19528	1.03658
349	Amino Acids	L-Phenylalanine	HMDB0000159	C00079	map00360 Phenylalanine metabolism	4.38	23.1177	22.8513	22.9802	23.1543	23.0778	22.9478	22.7095	23.5849	23.4514	24.2856	23.6224	23.3756	0.00826608	-0.483372	0.715304	0.045719	0.1641	0.784891	0.803366
339	Peptides	Ala-Ala	HMDB0028680			3.32	19.3571	19.079	19.9692	19.3119	19.5473	19.2342	20.161	20.8036	19.4811	19.9728	19.9347	19.5611	0.0448337	-0.569243	0.67397	0.034352	0.14011	0.853531	1.0958
338	Peptides	Ala-Gly	HMDB0006899			3.71	19.6036	19.0735	19.7216	19.4898	19.7936	19.5503	19.9271	20.4137	20.175	20.2282	19.8779	19.5643	0.0841841	-0.492306	0.710888	0.012121	0.073491	1.13377	1.27816
337	Amino Acids	N-Acetylvaline	HMDB0011757			3.32	17.9354	16.7662	17.4104	17.0138	17.0674	17.3681	18.6818	17.9443	17.4949	18.7492	18.1487	19.2598	0.104647	-1.11956	0.460235	0.0046616	0.04416	1.35497	1.6695
330	Amino Acids	2-Hydroxyethanesulfonate	HMDB0003903	C05123	map00430 Taurine and hypotaurine metabolism	4.23	18.6747	18.6048	18.4309	18.2358	18.2037	17.897	19.1043	19.4727	18.9512	19.1058	19.256	18.5471	0.152532	-0.731685	0.6022	0.0017979	0.028619	1.54335	1.60757
320	Organic Acids	(S)-3,4-Dihydroxybutyric acid	HMDB0000337			3.47	22.5212	22.3658	22.3826	22.5719	22.5121	22.8806	22.8391	22.6084	23.0697	23.056	22.7607	22.8051	0.0226942	-0.317449	0.802488	0.013079	0.075668	1.12109	1.56166
318	Organic Acids	Succinic acid semialdehyde	HMDB0001259	C00232	map00250 Alanine, aspartate and glutamate metabolism	3.34	22.462	22.3634	22.3394	22.4916	22.5077	22.8271	22.8198	22.5964	23.038	23.0004	22.7451	22.7797	0.0375615	-0.331356	0.794789	0.0073453	0.056698	1.24643	1.62201
317	Organic Acids	Hydroxypropionic acid	HMDB0000700	C01013	map00240 Pyrimidine metabolism	3.53	22.8038	22.6304	22.6654	22.8577	22.7735	23.1757	23.1018	22.8723	23.3416	23.3375	23.0371	23.1077	0.0214769	-0.315255	0.803709	0.016128	0.087487	1.05806	1.54335
316	Organic Acids	gamma-Hydroxybutyric acid	HMDB0000710	C00989	map00650 Butanoate metabolism	4.22	16.5994	16.5504	16.6307	16.3084	16.7978	16.6501	18.3175	17.9567	17.8774	18.0149	18.03	17.39	0.114873	-1.34161	0.394579	2.4104e-06	0.0015553	2.80819	1.69079
304	Nucleotides	dUDP(2'-Deoxyuridine 5'-diphosphate)	HMDB0001000	C01346	map00240 Pyrimidine metabolism	2.34	19.0045	17.4287	18.0793	18.0273	17.5969	18.2575	19.2577	19.1618	19.1494	18.7069	18.792	19.4199	0.0984579	-1.01559	0.494625	0.0024876	0.033525	1.47463	1.63446
301	Nucleotides	Inosinic acid(Inosine-5'-monophosphate)	HMDB0000175	C00130	map00230 Purine metabolism	2.48	20.2762	19.5005	19.8285	19.8912	19.8093	19.9512	20.4097	20.7835	20.7124	20.6163	20.5003	19.9939	0.0110426	-0.626539	0.647729	0.0023173	0.03274	1.48492	1.4482
295	Nucleotides	Succinyladenosine	HMDB0000912			2.54	19.7625	18.4751	19.514	19.6293	18.7432	19.198	20.6203	19.7609	20.5207	19.9598	19.9148	20.0202	0.034294	-0.912452	0.531282	0.0049386	0.044289	1.3537	1.61631
293	Nucleotides	(R)-b-aminoisobutyric acid	HMDB0002299	C01205	map00240 Pyrimidine metabolism	3.77	21.1301	20.8585	21.22	20.8774	20.9609	20.6341	21.3907	22.1008	20.6999	21.7785	21.6789	21.2945	0.0182148	-0.543705	0.686007	0.030062	0.12774	0.893673	0.985911
291	Nucleotides	Pseudouridine	HMDB0000767	C02067	map00240 Pyrimidine metabolism	0.99	21.3084	19.9855	20.5308	20.3925	20.5598	21.2191	21.48	21.4408	21.1982	21.5315	21.1329	21.8122	0.0751364	-0.766587	0.587807	0.0075695	0.056698	1.24643	1.5097
285	Carbohydrates	Tetrasaccharides(Glycogen, Stachyose)	HMDB0003553	C01613	map00052 Galactose metabolism	4.62	18.866	20.7815	20.4167	19.1289	20.6206	20.5991	21.9034	22.1631	21.4041	22.0659	21.9658	20.627	0.0466466	-1.61942	0.325467	0.0031014	0.035951	1.44429	1.60523
284	Carbohydrates	6-Phosphogluconic acid	HMDB0001316	C00345	map00030 Pentose phosphate pathway	0.9	23.9571	23.9459	23.8986	24.3581	24.2428	23.6126	24.2289	24.6651	24.9249	24.9459	24.5696	24.7687	0.0460979	-0.681348	0.623583	0.0012591	0.023022	1.63786	1.62818
280	Carbohydrates	D-Sedoheptulose 7-phosphate	HMDB0001068	C05382		1.3	22.7002	21.0971	21.8326	21.6032	21.4006	22.0764	22.9941	22.9632	22.9152	22.7152	22.6526	23.1956	0.020533	-1.12102	0.459769	0.00096043	0.020909	1.67967	1.73378
274	Carbohydrates	Trisaccharides(Maltotriose, multiple isomers)	HMDB0001262	C01835	map02010 ABC transporters, Galactose Metabolism	0.76	19.2235	20.7203	19.9782	20.0023	20.9158	20.9485	21.451	21.7718	21.5457	22.0236	21.7291	20.2435	0.0217368	-1.16269	0.446679	0.011781	0.073491	1.13377	1.48886
273	Carbohydrates	Disaccharide 2				2.29	17.4502	18.9399	18.2755	18.1459	19.1148	19.1823	19.757	20.0042	19.6453	20.2125	19.9491	18.5875	0.0299776	-1.17448	0.443044	0.0090411	0.063785	1.19528	1.51101
270	Carbohydrates	D-Ribulose 5-phosphate	HMDB0000618	C00199	map00030 Pentose phosphate pathway	1.49	23.127	23.3201	23.2895	23.0565	23.0396	23.0465	23.5125	23.5827	23.5347	23.3973	23.4316	23.734	0.0652167	-0.385583	0.765469	0.0002983	0.0146	1.83565	1.44157
268	Carbohydrates	D-Arabinose 5-phosphate	HMDB0011734	C01112	map00540 Lipopolysaccharide biosynthesis	1.63	21.0759	20.8416	21.0383	20.6723	20.8561	20.6258	21.4497	21.5025	21.3621	20.9999	21.2362	21.4323	0.0500397	-0.478791	0.717578	0.0011286	0.022095	1.65571	1.36554
261	Carbohydrates	scyllo-Inositol	HMDB0006088	C06153	map00562 Inositol phosphate metabolism	3.3	21.7583	21.9755	21.8266	22.1457	22.4925	22.379	22.3387	22.4491	22.6262	22.935	22.5117	22.3632	0.031823	-0.441071	0.736587	0.015339	0.085529	1.06789	1.25852
260	Carbohydrates	myo-Inositol	HMDB0000211	C00137	map00052 Galactose metabolism	3.3	21.7583	21.9755	21.8266	22.1457	22.4925	22.379	22.3387	22.4491	22.6262	22.935	22.5117	22.3632	0.031823	-0.441071	0.736587	0.015339	0.085529	1.06789	1.25852
256	Carbohydrates	Sucrose	HMDB0000258	C00089	map00052 Galactose metabolism	2.83	15.7135	16.9634	16.5303	16.4602	16.6693	16.8268	17.8753	17.2888	17.447	16.8318	19.008	16.8753	0.0501807	-1.0271	0.490694	0.021161	0.10653	0.972528	1.23373
255	Carbohydrates	epi-Inositol	HMDB0240207			3.39	19.2022	19.2652	19.6805	19.4433	20.1577	19.9443	20.1307	20.8608	20.4715	20.3243	20.4689	20.8879	0.030832	-0.908462	0.532753	0.00099617	0.020909	1.67967	1.64675
252	Carbohydrates	D-Glucose	HMDB0000122	C00031	map00010 Glycolysis / Gluconeogenesis	3.22	25.4622	25.2958	25.3622	25.544	25.5323	25.8587	25.7841	25.5989	26.0091	26.0518	25.7768	25.8125	0.0594906	-0.329664	0.795722	0.010631	0.068864	1.16201	1.57633
250	Carbohydrates	D-Ribose	HMDB0000283	C00121	map00030 Pentose phosphate pathway	3.16	20.3547	20.0881	20.3318	20.4913	20.5051	20.7136	20.5731	20.5001	20.8722	20.8621	20.5594	20.5964	0.0508272	-0.246493	0.842943	0.046164	0.1641	0.784891	1.37399
248	Carbohydrates	D-Mannose	HMDB0000169	C00936	Galactose Metabolism	3.65	18.4432	18.0053	17.8712	18.28	18.1709	17.8581	19.1125	19.1763	19.1749	19.1489	19.0147	18.6254	0.135104	-0.937335	0.522197	2.7418e-05	0.004901	2.30972	1.72914
246	Carbohydrates	Hexose2	HMDB0000122	C00031	map00010 Glycolysis / Gluconeogenesis	3.05	19.6906	19.4866	19.4069	19.4401	19.7733	19.5331	20.3698	20.6137	20.5779	21.0686	20.4028	20.683	0.0740941	-1.06422	0.478233	4.1886e-06	0.0015553	2.80819	1.76647
245	Carbohydrates	Hexose1	HMDB0000122	C00031	map00010 Glycolysis / Gluconeogenesis	3.39	20.1242	19.768	20.0989	20.0127	20.2827	19.9648	20.2202	20.5915	20.314	20.6558	20.2671	20.4363	0.164685	-0.372271	0.772565	0.0043391	0.043247	1.36404	1.54029
242	Carbohydrates	D-Arabitol	HMDB0000568	C01904	map00040 Pentose and glucuronate interconversions	3.86	19.6586	19.893	19.1534	18.908	19.5493	19.3102	20.7058	21.4416	20.9151	21.1983	20.8117	21.0096	0.0266452	-1.6016	0.32951	5.2963e-06	0.0015553	2.80819	1.92331
241	Carbohydrates	Pentitol	HMDB0001851	C00532	map00040 Pentose and glucuronate interconversions	3.76	19.642	19.3336	19.0619	19.4283	19.2833	18.9272	20.1961	20.4822	20.3726	21.0398	20.4832	20.1302	0.103903	-1.17128	0.444026	3.9281e-05	0.0049981	2.3012	1.79006
222	Unannotated	X-M2-MZ225.06293RT39				-4.22	17.8919	18.1468	18.2258	18.189	18.198	18.2303	18.6782	18.3702	18.8936	18.8078	18.4647	18.5064	0.110993	-0.473183	0.720374	0.00077508	0.01951	1.70974	1.72444
215	Organic Acids	Glutaric acid	HMDB0000661	C00489	map00071 Fatty acid degradation	4.26	18.8992	18.5674	18.6282	18.8084	18.5484	19.0806	19.0609	18.7914	19.3041	19.1781	19.0418	18.817	0.0431503	-0.276818	0.825409	0.042451	0.15889	0.798903	1.34324
203	Amino Acids	L-Cystathionine	HMDB0000099	C02291	map00260 Glycine, serine and threonine metabolism	2	18.3158	17.7433	18.107	17.4905	17.7199	17.5655	18.8542	19.0249	18.6023	18.9043	18.8642	18.9495	0.0298796	-1.04293	0.485342	2.7815e-05	0.004901	2.30972	1.76623
197	Glycerophosphoserines	LysoPI(18:1)	HMDB0061693		Glycerophospholipid metabolism	2.29	20.6873	20.4377	21.4759	20.5498	20.6024	20.6726	20.9946	21.0059	21.3747	21.8819	21.2164	21.6813	0.120302	-0.621525	0.649983	0.015104	0.085296	1.06907	1.13434
190	Fatty Acids	Oleic acid(FFA(18:1)	HMDB0000207	C00712	map00061 Fatty acid biosynthesis	0.85	22.4762	22.6079	23.1751	23.0141	22.7682	22.7945	22.8024	23.1475	23.3206	23.6266	23.4736	23.153	0.0623359	-0.447943	0.733087	0.017528	0.093025	1.0314	0.847939
185	Fatty Acids	Palmitoleic acid(FFA(16:1)	HMDB0003229	C08362	map00061 Fatty acid biosynthesis	1.33	19.2109	19.2641	19.8582	19.3666	19.072	19.1756	19.7141	19.8579	19.6822	19.9664	20.0144	19.5649	0.0430784	-0.475417	0.719259	0.0053523	0.047153	1.32649	1.0893
163	Carbohydrates	Ribonic acid	HMDB0000867	C01685		2.9	19.997	19.6978	20.0353	20.0375	20.2471	20.362	20.3083	20.6232	20.4368	20.7562	20.281	20.1612	0.0114795	-0.364997	0.776471	0.019599	0.10097	0.995808	1.45719
162	Carbohydrates	Arabinonic acid	HMDB0000539	C00878		2.9	19.997	19.6978	20.0353	20.0375	20.2471	20.362	20.3083	20.6232	20.4368	20.7562	20.281	20.1612	0.0114795	-0.364997	0.776471	0.019599	0.10097	0.995808	1.45719
128	Unannotated	X-M1-MZ158.11756RT181.8				-0.04	19.1044	18.4932	19.3088	19.1752	19.4098	19.2443	20.0842	20.2441	19.968	20.5839	20.2639	19.9646	0.0130305	-1.06214	0.478921	7.0572e-05	0.0069082	2.16064	1.77051
125	Unannotated	X-M1-MZ129.05462RT97.2				1.82	20.226	20.3874	20.2706	20.5955	21.9324	21.3726	21.2333	22.0614	21.7134	21.2012	21.533	21.4324	0.0273535	-0.731696	0.602196	0.041894	0.15773	0.802086	1.04899
111	Peptides	gamma-Glu-Ile	HMDB0011170			-0.82	17.9377	15.7863	17.7805	16.6769	16.1993	15.9358	17.3615	17.4221	17.1085	18.3538	17.6528	18.5225	0.0225293	-1.01746	0.493987	0.046195	0.1641	0.784891	1.4132
106	Peptides	Val-Lys	HMDB0029132			-1.2	18.1959	17.9772	17.9115	18.2278	18.3816	18.2799	18.351	18.2824	18.4768	18.62	18.7048	18.1246	0.0125923	-0.264266	0.832622	0.044939	0.16293	0.787999	1.01873
98	Nucleotides	Inosinic acid	HMDB0000175	C00130	map00230 Purine metabolism	-0.96	21.0074	20.2022	20.6171	20.6708	20.6827	20.6864	21.1607	21.4389	21.547	21.4186	21.3284	20.7493	0.100821	-0.629403	0.646444	0.0025729	0.033525	1.47463	1.43904
86	Amino Acids	L-Tryptophan	HMDB0000929	C00078	map00260 Glycine, serine and threonine metabolism	-0.51	24.5843	24.6842	24.3047	24.4288	24.6234	24.1581	25.3652	24.7555	24.5411	25.5537	24.7785	25.1538	0.00334307	-0.560731	0.677959	0.011424	0.072932	1.13708	1.1962
82	Amino Acids	L-Kynurenine	HMDB0000684	C00328	map00380 Tryptophan metabolism	-0.94	17.153	17.3493	17.0946	18.0651	18.2519	17.4151	19.1423	17.9862	17.9491	18.8368	18.0695	18.5836	0.0178355	-0.873066	0.545985	0.011991	0.073491	1.13377	1.31806
81	Amino Acids	Oxidized glutathione	HMDB0003337	C00127	map00480 Glutathione metabolism	-1.09	20.808	20.5846	21.0257	20.4722	20.7063	20.9049	21.3621	22.1445	21.2736	21.5987	21.4379	21.6992	0.0828846	-0.83573	0.560299	0.00027648	0.0146	1.83565	1.80453
76	Glycerophosphoethanolamines	LysoPE(18:1/0:0)	HMDB0011506		Phospholipid metabolism	-1.08	22.8595	23.0056	23.1289	22.9884	22.4488	23.1828	23.0427	23.2725	23.3497	23.4129	23.4448	23.3051	0.0164265	-0.368953	0.774344	0.012842	0.075668	1.12109	1.37569
75	Glycerophosphoethanolamines	LysoPE(0:0/18:1)	HMDB0011476		Phospholipid metabolism	-1.27	19.8603	20.0666	20.2427	20.1324	19.6642	20.2337	20.188	20.3855	20.4764	20.5797	20.4995	20.4657	0.0227486	-0.399164	0.758297	0.0042108	0.043247	1.36404	1.4935
69	Glycerophosphoethanolamines	LysoPE(0:0/17:0)	HMDB0061691		Phospholipid metabolism	-0.78	15.3362	15.6203	15.616	15.439	15.3268	15.7523	15.9038	16.3644	16.574	16.607	16.3644	15.1477	0.0441656	-0.645149	0.639427	0.021795	0.10727	0.969522	1.32756
68	Amino Acids	N-Acetylglutamine	HMDB0006029			-0.67	21.854	20.948	21.6518	20.832	20.9928	22.1636	22.3272	21.7175	21.7022	21.9756	22.2731	22.9508	0.0403279	-0.750683	0.594322	0.030159	0.12774	0.893673	1.40706
62	Amino Acids	1-Methylhistidine	HMDB0000001	C01152	map00340 Histidine metabolism	-0.32	19.5027	19.802	19.1664	18.9843	18.9167	19.411	20.0113	19.841	20.0454	19.8894	19.8152	19.6355	0.0696422	-0.575758	0.670934	0.0033245	0.037074	1.43093	1.64188
42	Glycerophosphocholines	LysoPC(16:1/0:0)	HMDB0010383		map00564 Glycerophospholipid metabolism	-1.53	19.5986	19.7504	19.9756	19.8234	19.7723	20.276	20.4316	21.2114	20.9423	21.028	21.5385	19.6418	0.0147092	-0.932881	0.523811	0.0093397	0.063785	1.19528	1.39616
40	Glycerophosphocholines	LysoPC(0:0/16:1)			map00564 Glycerophospholipid metabolism	-1.59	17.0722	17.2587	17.3537	17.2639	17.2726	17.6817	17.7908	18.6803	18.402	18.4738	18.9355	16.9938	0.0423311	-0.895593	0.537526	0.013753	0.07868	1.10414	1.3573
26	Acylcarnitines	Oleoylcarnitine(AcCa(18:1)	HMDB0005065		map01212 Fatty acid metabolism; map00071 Fatty acid degradation	-1.94	23.5728	23.5431	23.4745	23.2157	23.8244	23.3363	25.2229	24.9103	24.5895	23.8634	24.8554	24.458	0.0691317	-1.15544	0.44893	0.00025524	0.0146	1.83565	1.59852
25	Acylcarnitines	Palmitoylcarnitine(AcCa(16:0)	HMDB0000222	C02990	map01212 Fatty acid metabolism; map00071 Fatty acid degradation	-1.39	22.5283	22.5616	22.4182	22.1242	22.7687	22.4082	24.2298	23.6746	23.3742	22.7628	23.9021	23.2068	0.0769292	-1.05685	0.480681	0.0010123	0.020909	1.67967	1.48215
23	Cofactors	Flavin Mononucleotide	HMDB0001520	C00061	map00190 Oxidative phosphorylation	-1.1	17.965	17.9399	18.0107	17.7097	18.2507	17.8096	17.94	18.045	18.3633	18.6961	19.3421	18.6898	0.112927	-0.565113	0.675903	0.029908	0.12774	0.893673	1.12225
20	Cofactors	Nicotinamide ribotide	HMDB0000229	C00455	map00760 Nicotinate and nicotinamide metabolism	-2.48	20.7939	19.92	20.2821	20.6595	20.614	20.8897	21.7035	21.3978	21.3343	21.2415	21.3347	21.7313	0.106418	-0.930627	0.52463	0.00027721	0.0146	1.83565	1.7426
19	Choline	Acetylcholine	HMDB0000895	C01996	map00564 Glycerophospholipid metabolism	-1.09	22.2112	21.9369	21.986	22.5176	22.7219	22.4749	22.9061	23.0017	22.7987	22.6256	22.5742	23.0681	0.0476348	-0.520995	0.696891	0.0064502	0.05361	1.27075	1.55675
15	Acylcarnitines	Hexadecenoylcarnitine(AcCa(16:1)	HMDB0013207		map01212 Fatty acid metabolism; map00071 Fatty acid degradation	-1.56	21.3512	21.3795	21.7535	20.8598	21.7658	21.3007	23.1996	22.8916	22.3109	21.5006	22.7632	22.2282	0.022248	-1.08058	0.472838	0.0033042	0.037074	1.43093	1.41894
12	Acylcarnitines	Tetradecanoylcarnitine(AcCa(14:0)	HMDB0005066		map01212 Fatty acid metabolism; map00071 Fatty acid degradation	-1.77	19.8803	20.0098	20.3018	19.8035	20.4047	20.1142	20.993	20.6848	20.5515	20.0902	20.7792	20.4822	0.031489	-0.51108	0.701697	0.0087304	0.063045	1.20035	1.28694
10	Acylcarnitines	Hexadecadienoylcarnitine(AcCa(16:2)	HMDB0013334		map01212 Fatty acid metabolism; map00071 Fatty acid degradation	-1.36	19.2925	20.0467	20.0449	19.6175	20.3291	20.055	21.1602	20.9238	20.5418	20.083	21.2026	21.0942	0.0263289	-0.936673	0.522436	0.0026115	0.033525	1.47463	1.46519
8	Acylcarnitines	5-Tetradecenoylcarnitine(AcCa(14:1)	HMDB0002014		map01212 Fatty acid metabolism; map00071 Fatty acid degradation	-1.38	17.2074	17.1993	17.6662	16.9019	17.6344	17.1824	18.7645	18.958	18.0105	17.3783	18.7778	18.1674	0.0496119	-1.04416	0.484926	0.0034245	0.037449	1.42656	1.43071
1	Acylcarnitines	L-Carnitine	HMDB0000062	C00318	map04714 Thermogenesis	-1.4	24.7463	24.7891	24.8153	24.413	24.8086	24.2765	24.9997	25.0403	25.3693	25.0023	25.1612	24.5444	0.0228903	-0.378058	0.769473	0.027142	0.12242	0.912148	1.0638

## Sheet: source data for E-H
Fig 5E			Fig 5F			Fig 5G			Fig 5H
WT	ACP-/-		WT	ACP-/-		WT	ACP-/-		WT	ACP-/-
0.201283	0.0352267		0.259238	0.0720788		0.0182366	0.0100798		20.5373	4.09513
0.459114	0.071371		0.235659	0.0450875		0.0157705	0.0315233		25.6586	8.52911
0.167094	0.0606795		0.241974	0.187197		0.0128559	0.0236283		23.0171	7.32964
0.1507	0.0341116		0.174068	0.0494509		0.0116303	0.0199045		22.1141	12.8553
0.378476	0.105824		0.20272	0.0926069		0.0138081	0.0229612		29.3243	11.1302
0.22105
