# Supplementary material for: FUNCTIONALIZED POLYMERIC MEMBRANES FOR BIOSEPARATION AND BIOCATALYSIS
Source: eLife journal article supplement (doi:10.7554/elife.65279), 2007-01-01
Supplement: supp [file elife-65279-supp-v1.zip › elife_poa_e65279_Figure_6_source_data_1.xlsx]

## Sheet: Sheet1
	Fig 6A						Fig 6B					Fig 6E
	dsGFP 15min	dsFABP 15min	dsGFP 60min	dsFABP 60min			dsGFP 15min	dsFABP 15min	dsGFP 60min	dsFABP 60min			ACP-/-	ACP-/-	ACP-/-	ACP-/-	ACP-/-+ACPpp	ACP-/-+ACPpp	ACP-/-+ACPpp	ACP-/-+ACPpp	ACP-/-+ACPpp+dsGFP	ACP-/-+ACPpp+dsGFP	ACP-/-+ACPpp+dsGFP	ACP-/-+ACPpp+dsGFP	ACP-/-+ACPpp+dsFABP	ACP-/-+ACPpp+dsFABP	ACP-/-+ACPpp+dsFABP	ACP-/-+ACPpp+dsFABP
	0.13896	0.08399	0.3087	0.25117			0.117621	0.435048	0.9372	0.794697		FABP	5077.84	7434.4	8599.28	6888.62	22381.2	35857.8	30786.3	19893.4	16384	18820.3	17198.6	14868.8	3.36359	1.59107	15.7797	1.49485
	0.12443	0.11955	0.48137	0.0868			0.306871	0.980492	1.05633	0.224881		CROT	0.664343	1.02811	1.29235	1.02811	1.75321	1.47427	3.09513	1.64718	2.54912	1.19748	1.55833	1.90528	0.295248	0.812252	0.673617	0.768438
	0.2195	0.1057	0.08908	0.10468			0.21073	0.3408	0.293299	0.303101		CPT2	140.07	115.36	145.009	196.72	621.668	786.88	515.561	315.173	487.751	382.681	568.1	433.534	25.6342	132.514	80.4488	64.621
	0.11038	0.08747	0.15589	0.64691			0.257862	1.13839	1.47124	1.40369		CRAT	64.6841	91.457	105.36	45.939	140.07	115.36	125.009	196.72	127.116	213.782	111.125	120.259	95.3424	122.514	80.4488	74.212
	0.074701	0.18756	0.19021	0.32475			1.01389	0.256354	1.56699	0.771628		ACDM	242.191	315.173	433.534	484.382	689.784	1089.91	1168.14	497.999	580.037	661.685	765.363	910.175	103.25	352.139	274.374	256.3
	0.04673	0.13844	0.23197	0.02203			0.337979	0.156828	0.637869	0.237699		ACDS	3.18215	3.13834	5.38893	7.3615	24.59	26.3549	30.2738	14.42	15.5625	16.9123	18.507	16	4	5.24157	2.90794	3.83706
	0.06307	0.08742	0.0726	0.34346			0.180956	0.283497	0.782743	1.21391		ACDSB	6.40856	7.67411	12.4666	20.393	36.7584	59.7141	88.0347	33.5909	50.2134	38.3193	50.5626	20.5348	5.42642	6.77396	8.45614	4.85678
	0.19891	0.097134	0.14233	0.184			0.714775	0.860913	0.555685	0.04524		ECH-6	21.5557	13.1775	26.9087	36.2523	32.6724	65.3448	80.4488	64	46.5271	73.0089	76.6386	64	22.4711	30.91	22.0087	14.6213
	0.17919	0.20095	0.69449	0.09991			0.478025	0.753009	2.76108	0.992071		ACAT	1.69349	1.44393	4.50023	3.38698	6.6807	6.58873	15.6707	8.57419	5.9794	5.50217	6.32033	2.88786	3.03143	2.92817	1.93187	1.81504
	0.2055	0.0954	0.64805	0.29769			1.06236	0.373756	2.30643	0.52572
	0.036	0.016093	0.22669	0.13662			0.2262	0.378375	1.50657	0.631947		Fig 6F						Fig 6G
	0.049852	0.14911	0.31292	0.09032			1.29749	0.140995	0.424492	0.447865		ACP-/-	ACP-/-+ACPpp	ACP-/-+ACPpp+dsGFP	ACP-/-+ACPpp+dsFABP			ACP-/-	ACP-/-+ACPpp	ACP-/-+ACPpp+dsGFP	ACP-/-+ACPpp+dsFABP
	0.19817	0.1127	0.13655	0.20217			0.473501	0.456159	0.201788	0.525526		0.144	0.51508	0.201283	0.123309			0.117739	0.27698	0.148912	0.17111
	0.17645	0.13965	0.40809	0.15076			0.534984	0.981465	1.61654	0.868892		0.28899	0.455848	0.459114	0.154932			0.0935191	0.145729	0.194529	0.103619
	0.12135	0.1455	0.05317	0.18047			1.4484	0.033175	2.37602	0.234488		0.0459019	0.343903	0.249231	0.186193			0.0585363	0.194053	0.211981	0.135983
	0.180714	0.05504	0.1192	0.25954			0.816878	0.217901	0.354372	1.18322		0.0225478	0.231122	0.378476	0.113854			0.155243	0.237924	0.228083	0.0536187
	0.1509	0.03428	0.22719	0.05201			1.12042	0.079922	1.14831	0.45155		0.0184415	0.201058	0.22105	0.124731			0.110623	0.201877	0.172364	0.0976851
	0.0117	0.03165	0.42355	0.13873			0.13572	0.138733	1.47403	0.122899
	0.1219	0.08783	0.23777	0.0373			1.03974	0.189745	2.97942	0.09802
	0.19837	0.22982	0.25092	0.15713			0.762056	1.00411	0.5964	0.201313
	0.103165	0.02879	0.39914	0.06259			0.110835	0.116113	0.986963	1.19
	0.0616	0.21058	0.3403	0.16419			0.294807	0.575288	0.230439	0.579058
	0.16335		0.54605	0.15211			0.242782		0.356074	1.92523
	0.06334		0.45915	0.36372			0.239012		2.03877	0.618676
			0.22868	0.55737					0.979423	0.97074
	Fig 6C			Fig 6D
	dsGFP	dsFABP		dsGFP	dsFABP
	0.248234	0.109552		0.171585	0.0922101
	0.316104	0.0545706		0.197831	0.0899197
	0.184367	0.0224012		0.112323	0.0500036
	0.31296	0.113672		0.166835	0.124589
	0.144885	0.0203179		0.134822
	0.357428	0.151132
	Fig 6H
	Compound	ACP-/-	ACP-/-	ACP-/-	ACP-/-	ACP-/-+ACPpp	ACP-/-+ACPpp	ACP-/-+ACPpp	ACP-/-+ACPpp	ACP-/-+ACPpp+dsGFP	ACP-/-+ACPpp+dsGFP	ACP-/-+ACPpp+dsGFP	ACP-/-+ACPpp+dsGFP	ACP-/-+ACPpp+dsFABP	ACP-/-+ACPpp+dsFABP	ACP-/-+ACPpp+dsFABP	ACP-/-+ACPpp+dsFABP
	AcCa(14:0)	821.52	692.838	776.358	1042	1325.99	1337.2	1144.37	1100.75	1228.61	1520.87	2046.26	1176.68	1626.03	1739.77	1007.62	749.574
	AcCa(14:1) 1	311.598	184.554	187.794	401.004	332.874	212.616	218.574	156.312	226.98	329.868	422.064	226.026	408.042	286.614	222.066	216.144
	AcCa(14:1) 2	666.576	521.298	566.676	748.746	1451.97	1650.33	1009.08	678.186	1668.87	1922.26	2208.15	1557.25	1167.12	1354.64	1214.8	582.66
	AcCa(14:2)	628.758	445.5	530.802	593.172	1229.27	1569.13	769.626	678.24	1380.13	1495.46	1431.83	1077.7	869.796	989.784	1243.48	588.402
	AcCa(15:0)	75.51	73.62	97.866	88.722	124.218	160.614	125.118	186.192	105.932	91.532	99.414	107.958	49.212	44.298	66.87	82.692
	AcCa(16:0)	4822.58	3785.45	5969.23	5803.67	16422.7	14678.9	23000.5	15498.4	8160.86	7908.89	9988.29	10549.6	6750.92	4430.95	3584.5	3860.91
	AcCa(16:1)	3670.94	3562.9	2284.56	4093.81	8257.5	5641.29	7515.29	5313.73	4075.78	5654.65	6364.03	5144.78	3204.97	2026.19	2689.22	2400.71
	AcCa(16:2)	1944.81	2203.2	1808.5	2140.6	4708.8	4602.56	3440.77	3422.61	3373.6	4071.33	3745.91	3093.95	1401.8	954.198	2625.21	1387.19
	AcCa(17:1)	240.876	171.738	216.342	254.124	554.868	495.99	508.932	536.886	360.172	313.39	282.198	275.868	227.754	150.084	116.424	163.728
	AcCa(17:2)	16.092	13.68	16.218	18.522	31.374	29.736	33.876	38.07	23.086	21.412	19.738	14.094	13.176	6.12	7.488	10.044
	AcCa(18:1)	11617	10565	15073.9	14706.5	31438.8	24871.5	52327	29960	22912.6	16816.6	17939.6	20624.7	6959.51	9708.34	7639.43	7300.19
	AcCa(18:2)	19032.6	17832.8	19797.2	21322.5	38044.3	34972.1	51142.8	37866.7	26254.9	20049.4	24879	21626.9	19073.4	9060.23	11151.7	12936.7
	AcCa(18:3)	27283.5	23359.5	24874.5	29038.7	48710.8	52353.5	66122.1	41823.4	29113	29789	36666.7	36140.9	18456.2	8582.38	13578.8	21230
	Acetylcarnitine	51424.3	95281.3	69109.3	66016.6	62082.9	113796	149288	105097	82444.3	167001	174971	123883	82273	108215	104742	108369
	Carnitine	10979.9	10138.8	10319.5	12781.4	43597.3	18969.7	44250.2	21710.8	16296.2	18436.1	28590.5	28362.1	11384.9	14232.1	12846	13961.6
	Fig 6I						Fig 6J
	ACP-/-	ACP-/-+ACPpp	ACP-/-+ACPpp+dsGFP	ACP-/-+ACPpp+dsFABP			ACP-/-	ACP-/-+ACPpp	ACP-/-+ACPpp+dsGFP	ACP-/-+ACPpp+dsFABP
	0.04995	0.048195	0.236085	0.110685			0.0497625	0.124407	0.624297	0.305362
	0.243825	0.327915	0.139605	0.18936			0.760014	0.86067	0.137387	0.779241
	0.07248	0.487515	0.15936	0.756825			0.323458	1.53134	0.487449	2.38296
	0.01695	0.74496	0.31404	0.30039			0.07917	2.10135	0.798466	0.695549
	0.1329	0.039255	0.090545	0.1188			0.36078	0.1518	0.982925	0.382269
	0.047955	0.11853	0.53457	0.05442			0.435424	0.298577	1.40241	0.143634
	0.280065	0.362175	0.73557	0.26721			0.636738	1.09704	2.03318	0.8143
	0.582795	0.28242	0.38997	0.01986			1.36362	0.723823	1.29383	0.0429765
	0.46128	0.0006	0.516585	0.194865			0.916216	0.350595	2.62128	0.727217
	0.33735	0.618555	0.271635	0.016425			0.566453	1.63312	0.819299	0.0475005
	0.0969	0.761475	0.069095	0.057975			0.029406	1.3583	0.648048	0.152682
	0.04875	0.7004	0.5593	0.18678			0.013572	0.79168	0.508938	0.59263
	0.25361	0.24016	0.3214	0.104205			0.526669	1.23147	0.0542865	0.256731
	0.17511	0.3519	0.3616	0.28994			0.358896	1.10556	1.73072	0.939462
	0.23978	0.803	0.5325	0.196			0.643536	0.8897	0.72382	0.45993
	0.15213	0.1588	0.0429	0.16766			0.318934	0.69604	1.13949	0.136471
	0.19369	0.1104	0.46251	0.09776			0.209607	0.48255	0.32025	0.287267
	0.1519	0.34083	0.3366	0.11174			0.48534	0.28651	1.68623	0.276711
	0.10072	0.80127	0.3817	0.193			0.248814	0.539851	1.1033	0.214131
	0.29046	0.4384	0.4661	0.172			0.229211	2.25667	0.74881	0.05278
		0.53077	0.4697					2.14175	0.43731
