# Supplementary material for: FUNCTIONALIZED POLYMERIC MEMBRANES FOR BIOSEPARATION AND BIOCATALYSIS
Source: eLife journal article supplement (doi:10.7554/elife.65279), 2007-01-01
Supplement: supp [file elife-65279-supp-v1.zip › elife_poa_e65279_Supplementary_file_1.xlsx]

## Sheet: peptide-Br
Protein Group	Protein ID		Protein Accession	Peptide	5th-1	5th-2	5th-3	A-1	A-2	A-3	Used	Candidate	Quality	Significance	Avg. ppm	Max Ratio	#Vector	Start	End	PTM
29	67	OMP	AAB20875.1	D.AQFQDEEEDGGRRV	4360000	4240000	3370000	7540000	6830000	8480000	N	Y	4.63	21.79	0.7	7.45	1	52	65
29	67		AAB20875.1	Q.FQDEEEDGGRRV	24500000	27600000	27900000	101000000	86000000	73200000	Y	Y	4.51	46.64	0.5	54.94	2	54	65
39	1795	ACP	ACP	S.Q(-17.03)VTFSRDWSP(-.98).G	6960000	23200000	21200000	21700000	32800000	48000000	Y	Y	23.29	56.76	0.8	10.4	1	22	31	Pyro-glu from Q; Amidation
40	1823		ACP	S.Q(-17.03)VTFSRDWSP.G	495000	795000	373000	624000	519000	796000	N	Y	2.41	25.29	8.2	44.48	2	22	31	Pyro-glu from Q
39	1795		ACP	Q.VTFSRDWSP(-.98).G	5770000	3420000	3790000	4880000	4340000	4620000	N	Y	3.76	4.09	7	2.27	1	23	31	Amidation
27	74	AKH	AKH1	A.Q(-17.03)LNFTPNWGT(-.98).G	917000	7640000	10600000	3400000	5690000	9660000	Y	Y	6.86	34.8	0.4	13.87	1	23	32	Pyro-glu from Q; Amidation
22	57	DH31	AKN21237.1	R.GLDLGINRGFSGAQAAKH.L	2040000	0	2310000	4270000	4100000	4820000	N	Y	4.71	10.91	0.9	3.62	1	70	87
24	57		AKN21237.1	R.GLDLGINRGFSGAQAA.K	150000	1950000	2390000	436000	853000	1210000	N	Y	2.98	36.04	2	23.51	1	70	85
24	57		AKN21237.1	R.GLDLGINRGFSG.A	3450000	7040000	5500000	9470000	9800000	11300000	N	Y	5.02	6.31	0.6	1.86	1	70	81
22	57		AKN21237.1	G.LDLGINRGFSGA.A	814000	1300000	970000	1340000	1330000	1920000	N	Y	4.02	5.33	1.1	2.45	1	71	81
24	57		AKN21237.1	G.LDLGINRGFSG.A	862000	1600000	1170000	1580000	1730000	2320000	N	Y	3.33	10.6	1.1	2.33	1	71	81
24	57		AKN21237.1	R.GLDLGINRG.F	3950000	2260000	2820000	7580000	6480000	7150000	Y	Y	10.08	12.74	0.6	3.21	1	70	78
24	57		AKN21237.1	R.GLDLGINR.G	3120000	1890000	1900000	2930000	2940000	3110000	N	Y	5.63	8.07	0.4	2.36	1	70	77
9	12	Allatotropin	AKN21240.1	R.GFKNVALSTARGF(-.98).G	179000000	152000000	184000000	378000000	344000000	378000000	Y	Y	37.23	9.07	0.6	2.14	1	43	52	Amidation
9	12		AKN21240.1	G.FKNVALSTARGF(-.98).G	24100000	80300000	62100000	76300000	121000000	180000000	N	Y	24.73	13.36	0.6	2.68	2	40	52	Amidation
9	12		AKN21240.1	F.KNVALSTARGF(-.98).G	3060000	3880000	3710000	10200000	9440000	9860000	N	Y	4.93	9.97	1	2.72	2	41	52	Amidation
9	12		AKN21240.1	K.NVALSTARGF(-.98).G	27300000	32000000	17100000	26200000	25900000	28800000	N	Y	6.8	2.52	0.6	1.53	2	42	52	Amidation
9	12		AKN21240.1	N.VALSTARGF(-.98).G	9170000	8270000	8120000	15300000	15900000	14700000	N	Y	10.55	8.57	0.4	2.07	1	44	52	Amidation
4	14	AST-A	AKN21241.1	R.PLYGGDRRFSFGL(-.98).G	0	434000	812000	1750000	2140000	2750000	N	Y	3.38	23.46	1.6	30.02	1	246	258	Amidation
4	14		AKN21241.1	R.ATGANALYSFGL(-.98).G	313000	953000	1420000	478000	970000	1250000	N	Y	4.88	60	0.7	47.21	1	114	125	Amidation
4	14		AKN21241.1	R.GPRTYSFGL(-.98).G	42500000	22300000	30100000	123000000	114000000	113000000	N	Y	28.91	29.01	0.9	4.92	1	129	137	Amidation
4	14		AKN21241.1	R.VRPYSFGL(-.98).G	22600000	17400000	15300000	51800000	49800000	55400000	N	Y	27.42	30.88	0.8	5.22	1	207	214	Amidation
4	14		AKN21241.1	K.RLPVYNFGL(-.98).G	1380000	1580000	1560000	3180000	4020000	4740000	N	Y	6.1	21.04	0.7	4.98	1	102	110	Amidation
4	14		AKN21241.1	R.LPVYNFGL(-.98).G	5640000	11600000	11000000	15000000	20800000	23200000	N	Y	15.77	35.41	0.4	6.03	1	103	110	Amidation
4	14		AKN21241.1	R.AGPATSRLYSFGL(-.98).G	850000	2900000	1990000	5690000	6350000	8320000	N	Y	6.83	56.75	0.6	32.26	1	218	230	Amidation
4	14		AKN21241.1	S.RLYSFGL(-.98).G	1690000	980000	1040000	4950000	4150000	4550000	N	Y	6.64	37.35	0.6	15.48	1	224	230	Amidation
4	14		AKN21241.1	R.APAEHRFSFGL(-.98).G	23900000	17800000	17300000	74500000	67100000	71200000	N	Y	11.95	28.42	1.7	4.88	2	262	272	Amidation
4	14		AKN21241.1	A.EHRFSFGL(-.98).G	1360000	941000	0	4170000	3710000	3740000	N	Y	5.83	21.46	4.3	8.17	1	265	272	Amidation
4	14		AKN21241.1	R.RFSFGL(-.98).G	4980000	3040000	3810000	11000000	10500000	11000000	N	Y	8.05	60	1	14.6	1	253	258	Amidation
4	14		AKN21241.1	R.EGRLYSFGL(-.98).G	9960000	8120000	7420000	26300000	23300000	26400000	N	Y	17	44.82	0.4	7.82	1	234	242	Amidation
4	14		AKN21241.1	E.GRLYSFGL(-.98).G	20000000	12600000	12900000	50400000	45700000	55700000	N	Y	21.22	40.27	0.7	6.88	1	235	242	Amidation
4	14		AKN21241.1	R.EGRLYSFGL.G	548000	212000	464000	396000	432000	498000	N	Y	2.73	6.58	7.9	5.79	1	234	242
6	18	MIP(AST-B)	AKN21242.1	R.AWSSLHGAW(-.98).G	156000000	96500000	117000000	303000000	295000000	324000000	Y	Y	47.93	16.11	1.2	3.04	1	137	145	Amidation
6	18		AKN21242.1	A.WSSLHGAW(-.98).G	11800000	7550000	7340000	27900000	26700000	25900000	N	Y	17.88	48	0.4	8.47	1	138	145	Amidation
6	18		AKN21242.1	R.GWRDLQSAW(-.98).G	12300000	35800000	32100000	41600000	56100000	84300000	Y	Y	33.49	60	0.7	13.34	1	61	69	Amidation
6	18		AKN21242.1	G.WRDLQSAW(-.98).G	13900000	10400000	10100000	25700000	25900000	29700000	N	Y	24.92	30.37	0.4	5.14	1	62	69	Amidation
6	18		AKN21242.1	R.AADWRAFHGSW(-.98).G	58300000	39800000	46300000	200000000	187000000	169000000	N	Y	28.37	29.28	0.7	4.96	2	149	159	Amidation
6	18		AKN21242.1	A.ADWRAFHGSW(-.98).G	3600000	2960000	2390000	13600000	12400000	12300000	N	Y	4.65	28.78	0.7	10.74	2	150	159	Amidation
6	18		AKN21242.1	A.DWRAFHGSW(-.98).G	8830000	6160000	5190000	27300000	23400000	24800000	N	Y	8.84	24.39	0.9	5.75	2	151	159	Amidation
6	18		AKN21242.1	D.WRAFHGSW(-.98).G	0	1580000	0	9040000	7960000	8430000	N	Y	4.12	13.12	1.4	5.34	1	152	159	Amidation
6	18		AKN21242.1	R.AWQDLNAGW(-.98).G	11700000	29400000	27000000	23900000	27800000	45100000	N	Y	18.48	52.66	0.8	9.49	1	25	33	Amidation
6	18		AKN21242.1	A.WQDLNAGW(-.98).G	6090000	6340000	6860000	13800000	14100000	17500000	N	Y	11.17	60	0.7	21.83	1	26	33	Amidation
6	18		AKN21242.1	A.WQDLGSAW(-.98).G	16400000	22700000	17200000	32400000	38900000	42200000	N	Y	22.38	55.58	0.6	10.12	1	2	9	Amidation
6	18		AKN21242.1	AWQDLGSAW(-.98).G	5090000	19200000	21000000	9940000	11000000	20800000	N	Y	14.69	60	0.4	16.1	1	1	9	Amidation
6	18		AKN21242.1	W.RDLQSAW(-.98).G	2000000	2250000	1910000	2860000	2750000	2820000	N	Y	4.48	10.2	0.7	4.83	1	63	69	Amidation
6	18		AKN21242.1	R.GWRDLQSA.W	3370000	3610000	2680000	5480000	5510000	4970000	N	Y	7.21	19.19	0.6	4.54	1	61	68
6	18		AKN21242.1	R.AWSNLNGAW(-.98).G	26100000	29100000	29600000	63700000	57000000	79800000	N	Y	22.57	28.82	0.7	4.89	1	73	81	Amidation
6	18		AKN21242.1	A.WSNLNGAW(-.98).G	3100000	2300000	2590000	8690000	8400000	8680000	N	Y	7.5	60	0.3	14.07	1	74	81	Amidation
6	18		AKN21242.1	R.AGPSNWNRLPAVW(-.98).G	3580000	9880000	17500000	14700000	24600000	39900000	N	Y	10.98	52.96	0.7	9.6	1	177	189	Amidation
6	18		AKN21242.1	W.NRLPAVW(-.98).G	7350000	3010000	4990000	10800000	9230000	9540000	N	Y	10.04	7.67	1.3	1.97	1	183	189	Amidation
6	18		AKN21242.1	R.EPGWTNLKGLW(-.98).G	175000	772000	852000	283000	503000	148000	N	Y	3.16	30.06	0.6	64	1	163	173	Amidation
6	18		AKN21242.1	P.GWTNLKGLW(-.98).G	926000	1650000	2140000	2910000	5010000	3260000	N	Y	4.02	28.7	0.7	15.31	1	165	173	Amidation
6	18		AKN21242.1	G.WTNLKGLW(-.98).G	2460000	1990000	0	6780000	6220000	7680000	N	Y	7.57	30.6	0.4	4.23	1	166	173	Amidation
6	18		AKN21242.1	T.NLKGLW(-.98).G	1240000	862000	1130000	4140000	3890000	3560000	N	Y	5.34	13.09	1	3.68	1	168	173	Amidation
6	18		AKN21242.1	A.GPSNWNRLPAVW(-.98).G	0	455000	784000	894000	1620000	2190000	N	Y	3.92	22.69	0.7	14.2	1	178	189	Amidation
17	32	FMRFa	AKN21244.1	R.AGNAPSSFLRL(-.98).G	6760000	4180000	4180000	14400000	14200000	15000000	N	Y	7.82	29.12	0.4	4.07	1	53	63	Amidation
17	32		AKN21244.1	R.AGNAPSSFLR.L	5310000	4980000	4420000	13200000	11900000	12400000	Y	Y	9.09	9.35	0.6	2.58	1	53	62
17	32		AKN21244.1	R.ARGGASGFLRL(-.98).G	15200	1530000	1310000	5180000	3780000	4320000	N	Y	3.32	6.56	0.5	4.34	1	66	76	Amidation
17	32		AKN21244.1	R.GSERNFLRF(-.98).G	6830000	6650000	6160000	17500000	17500000	15000000	Y	Y	9.67	15.29	0.7	2.6	1	79	87	Amidation
5	27	Natalisin	AKN21249.1	R.ASAGGQYFVPAR(-.98).G	11900000	12300000	9730000	25300000	24800000	23300000	Y	Y	12.01	9.76	0.8	2.24	1	183	194	Amidation
5	27		AKN21249.1	R.ASAGGQYFVPAR.G	7320000	7290000	7050000	18800000	17300000	19600000	N	Y	9.18	9.74	1.4	2.65	1	183	194
5	27		AKN21249.1	A.SAGGQYFVPAR(-.98).G	0	0	331000	1890000	1830000	1780000	N	Y	3.97	13.07	1	6.51	1	184	194	Amidation
5	27		AKN21249.1	A.GGQYFVPAR.G	1420000	0	1380000	4640000	4150000	4090000	N	Y	4.85	12.13	0.9	3.13	1	186	194
5	27		AKN21249.1	R.EMELFWPAR(-.98).G	1520000	1580000	1390000	4810000	5870000	5450000	N	Y	4.88	51.85	1.1	15.64	1	126	134	Amidation
5	27		AKN21249.1	R.EMELFWPAR.G	238000	0	510000	567000	672000	641000	N	Y	4.49	29.3	0.8	21.4	1	126	134
5	27		AKN21249.1	E.MELFWPAR(-.98).G	0	0	768000	634000	715000	703000	N	Y	3.41	5.49	4.9	3.07	1	127	134	Amidation
5	27		AKN21249.1	M.ELFWPAR(-.98).G	1970000	966000	1370000	2830000	2850000	3120000	N	Y	4.9	9.17	0.8	2.57	1	128	134	Amidation
5	27		AKN21249.1	M.ELFWPAR.G	2000000	1180000	1410000	3150000	2910000	3080000	N	Y	5.36	6.23	0.6	2.18	1	128	134
5	27		AKN21249.1	A.SAEEPFWAAR(-.98).G	3060000	2500000	2180000	5920000	5670000	6160000	N	Y	5.67	5.86	1.7	2.42	1	113	122	Amidation
5	27		AKN21249.1	A.SAEEPFWAAR.G	1160000	948000	813000	2110000	2020000	2190000	N	Y	4.47	4.14	1	2.27	1	113	122
5	27		AKN21249.1	S.AEEPFWAAR(-.98).G	3940000	2840000	2800000	8050000	6980000	7370000	Y	Y	7.02	8.75	0.6	2.47	1	114	122	Amidation
5	27		AKN21249.1	A.EEPFWAAR(-.98).G	3110000	2180000	2320000	5660000	5090000	5100000	N	Y	6.08	5.6	0.5	2.23	1	115	122	Amidation
5	27		AKN21249.1	S.AEEPFWAAR.G	1120000	785000	818000	2050000	2130000	2260000	N	Y	4.55	5.37	0.7	2.45	1	114	122
5	27		AKN21249.1	A.EEPFWAAR.G	0	647000	638000	1630000	1550000	1620000	N	Y	4.2	6.86	1	2.93	1	115	122
5	27		AKN21249.1	M.TLGSGSAEEPFWAAR(-.98).G	1290000	3330000	2590000	4530000	5710000	7010000	N	Y	5.51	6.78	1.2	2.29	1	213	227	Amidation
5	27		AKN21249.1	M.TLGSGSAEEPFWAAR.G	226000	753000	822000	875000	1240000	1810000	N	Y	3.6	4.9	1.2	2.57	1	213	227
5	27		AKN21249.1	T.LGSGSAEEPFWAAR(-.98).G	1000000	1710000	1480000	3150000	3230000	3450000	N	Y	3.97	4.74	1.4	2.28	1	214	227	Amidation
5	27		AKN21249.1	G.SGSAEEPFWAAR(-.98).G	1170000	797000	848000	2810000	2760000	2620000	N	Y	4.21	7.3	0.8	3.07	1	216	227	Amidation
5	27		AKN21249.1	E.LVDPFWVAR.G	1600000	2940000	3090000	1910000	2800000	2630000	N	Y	2.43	13.73	1	21.28	1	93	101
5	27		AKN21249.1	D.PFWVAR.G	740000	392000	2090000	1560000	1500000	1570000	N	Y	3.91	2.68	3.3	1.7	1	96	101
16	16	PDF	AKN21252.1	L.LGLPKLLNDA(-.98).G	16700000	14500000	21100000	11500000	15200000	23100000	N	Y	4.95	31.49	0.7	9.51	1	77	86	Amidation
16	16		AKN21252.1	G.LPKLLNDA(-.98).G	7050000	5560000	4980000	9630000	9140000	8920000	Y	Y	6.99	5.32	0.8	1.88	1	79	86	Amidation
16	16		AKN21252.1	L.LGLPKLL.N	32700000	38900000	33800000	18500000	21600000	16700000	N	Y	2.56	20.83	0.7	45.6	1	77	83
11	29	Pyrokinin 1	AYC12049.1	R.GAVPAAQFSPRL(-.98).G	18400000	13000000	13000000	58900000	52000000	56400000	Y	Y	20.01	22.92	0.8	3.99	1	76	87	Amidation
11	29		AYC12049.1	R.GAVPAAQFSPRL.G	814000	866000	622000	3990000	3410000	3830000	N	Y	3.51	9.92	1	5.52	1	76	87
11	29		AYC12049.1	R.GAVPAAQFSPR.L	2040000	1560000	1930000	5740000	5910000	5520000	N	Y	3.85	6.23	0.4	3.09	1	76	86
11	29		AYC12049.1	G.AVPAAQFSPRL(-.98).G	843000	911000	997000	3660000	3580000	3540000	N	Y	4.16	9.66	0.6	3.91	1	77	87	Amidation
11	29		AYC12049.1	A.VPAAQFSPRL(-.98).G	12500000	9920000	7990000	12600000	10700000	11800000	N	Y	5.29	6.42	1.7	1.86	2	78	87	Amidation
11	29		AYC12049.1	A.Q(-17.03)FSPRL(-.98).G	1300000	942000	915000	4740000	3990000	4540000	N	Y	5.74	12.18	0.8	4.35	1	82	87	Pyro-glu from Q; Amidation
11	29		AYC12049.1	R.Q(-17.03)QPFVPRL(-.98).G	1520000	1500000	1390000	4010000	4330000	4630000	N	Y	5.66	8.12	0.6	3.05	1	114	121	Pyro-glu from Q; Amidation
11	29		AYC12049.1	R.RQQPFVPRL(-.98).G	8020000	7870000	6220000	29300000	27300000	27100000	Y	Y	9.16	15.67	0.9	3.79	2	113	121	Amidation
11	29		AYC12049.1	R.QQPFVPRL(-.98).G	2270000	1910000	1400000	7730000	7200000	7140000	N	Y	4.85	17.03	1	4.13	1	114	121	Amidation
11	29		AYC12049.1	R.DSGDEWPQQPFVPR.L	328000	2260000	2980000	570000	889000	1980000	N	Y	4.96	18.22	1.1	5.04	1	124	137
11	29		AYC12049.1	D.SGDEWPQQPFVPR.L	203000	775000	712000	872000	1400000	2250000	N	Y	4.36	4.32	1.2	2.33	1	125	137
11	29		AYC12049.1	D.EWPQQPFVPR.L	10400000	28800000	28600000	26300000	38400000	51100000	N	Y	7.27	60	2.8	64	1	128	137
11	29		AYC12049.1	R.RLHQNGMPFSPRL(-.98).G	1300000	685000	0	6220000	4900000	4690000	N	Y	2.88	6.41	0.7	5.2	1	141	153	Amidation
11	29		AYC12049.1	R.LHQNGMPFSPRL(-.98).G	3430000	3700000	3670000	14000000	11500000	12200000	N	Y	4.78	14.12	1.4	3.51	2	142	153	Amidation
11	29		AYC12049.1	Q.VLAGPFVPRL(-.98).G	4250000	3330000	2850000	8340000	8870000	8090000	N	Y	3.8	36.17	2.4	45.76	1	64	73	Amidation
11	29		AYC12049.1	R.EGDFTPRL(-.98).G	5650000	5810000	5560000	15100000	14300000	14000000	Y	Y	10.17	36.63	0.7	6.19	1	32	39	Amidation
10	22	CAPA	AYC12050.1	R.RGLLAFPRV(-.98).G	3220000	1900000	2570000	5910000	5400000	6080000	N	Y	5.52	7.24	0.9	2.38	1	183	191	Amidation
10	22		AYC12050.1	R.GLLAFPRV(-.98).G	8090000	10600000	5860000	45200000	30700000	39900000	Y	Y	6.58	16.78	0.6	4.03	2	184	191	Amidation
10	22		AYC12050.1	G.LLAFPRV(-.98).G	661000	568000	384000	2450000	1780000	2000000	N	Y	3.62	8.75	1.3	4.2	1	185	191	Amidation
10	22		AYC12050.1	L.LAFPRV(-.98).G	2240000	1490000	1340000	4650000	3870000	4090000	N	Y	3.81	8.28	0.9	4.51	1	186	191	Amidation
10	22		AYC12050.1	R.RDGGQPAAPLWFGPRV(-.98).G	0	646000	0	1890000	2370000	3660000	N	Y	4.03	15.84	0.3	6.65	1	143	158	Amidation
10	22		AYC12050.1	R.DGGQPAAPLWFGPRV(-.98).G	648000	2650000	4550000	3670000	8440000	11000000	N	Y	4.38	30.72	0.9	23.36	2	144	158	Amidation
10	22		AYC12050.1	D.GGQPAAPLWFGPRV(-.98).G	283000	858000	989000	2320000	3300000	4550000	N	Y	4.3	9.47	1.5	4.46	1	145	158	Amidation
10	22		AYC12050.1	G.GQPAAPLWFGPRV(-.98).G	281000	860000	1000000	1390000	1980000	2560000	N	Y	4.48	5.05	0.7	2.6	1	146	158	Amidation
10	22		AYC12050.1	W.LAAGDVGGTKGDFTPRL(-.98).G	6230000	10300000	8580000	34000000	35500000	45700000	N	Y	4.85	60	0.5	24.06	1	233	249	Amidation
10	22		AYC12050.1	L.AAGDVGGTKGDFTPRL(-.98).G	8130000	7570000	7710000	46900000	41700000	46000000	N	Y	5.52	60	0.7	36.87	1	234	249	Amidation
10	22		AYC12050.1	R.AAGLFQFPRV(-.98).G	4480000	7140000	5960000	17500000	19900000	23300000	N	Y	6	21.86	0.6	8.36	1	68	77	Amidation
10	22		AYC12050.1	A.AGLFQFPRV(-.98).G	1380000	1110000	1880000	5540000	7320000	7920000	N	Y	5.03	21.52	0.4	8.25	1	69	77	Amidation
10	22		AYC12050.1	A.GLFQFPRV(-.98).G	1890000	2690000	1960000	5980000	7300000	12600000	N	Y	4.7	16.71	0.9	5.46	1	70	77	Amidation
10	22		AYC12050.1	G.LFQFPRV(-.98).G	1840000	1220000	1160000	5800000	5100000	5320000	N	Y	5.75	16.2	0.7	5.86	1	71	77	Amidation
10	22		AYC12050.1	L.FQFPRV(-.98).G	2190000	1100000	1400000	4950000	4720000	4940000	N	Y	5.36	11.9	0.7	3.4	1	72	77	Amidation
10	22		AYC12050.1	T.SSLFPHPRI(-.98).G	1010000	855000	865000	4900000	4030000	4310000	N	Y	4.73	15.28	0.8	4.97	1	42	50	Amidation
10	22		AYC12050.1	S.SLFPHPRI(-.98).G	1480000	0	1430000	3810000	3400000	3710000	N	Y	5.38	7.53	0.4	2.45	1	43	50	Amidation
12	31	CCAP	CCAP	R.AAAPPTPAQGIKP.W	7130000	6660000	6210000	15500000	14200000	13700000	N	Y	8.32	22.95	0.7	3.39	1	133	145
12	31		CCAP	A.APPTPAQGIKPW.R	4800000	2720000	3180000	6800000	6360000	6650000	N	Y	7.42	10.53	0.5	2.79	1	135	146
12	31		CCAP	A.APPTPAQGIKP.W	16400000	17400000	16200000	27400000	26900000	27000000	Y	Y	28.97	14.2	0.7	2.79	1	135	145
66	3803	GPB5	GPB5	R.SGPFKAL(-.98).G	0	1500000	0	4640000	4110000	3690000	N	Y	5.53	28.35	0.7	8.2	1	144	150	Amidation
66	3803		GPB5	R.SGPFKAL.G	3340000	3240000	3020000	0	6450000	6310000	Y	Y	10.75	16.89	0.5	3.16	1	144	150
50	3708	ITP	ITP	S.SPLDAHHLA.K	4090000	3790000	2660000	3760000	3510000	3460000	Y	Y	5.84	3.08	0.4	1.71	1	43	51
18	60	Kinin	Kinin	R.AGVRFSSWG(-.98).G	18000000	0	13500000	41900000	35500000	37100000	Y	Y	36.13	28.8	0.9	4.88	1	48	56	Amidation
18	60		Kinin	A.GVRFSSWG(-.98).G	5110000	5350000	5110000	14300000	13500000	15500000	N	Y	8.87	32.6	0.7	7.99	1	49	56	Amidation
18	60		Kinin	R.SKQAFYSWG(-.98).G	10700000	8960000	9360000	25100000	21500000	22200000	N	Y	10.7	20.44	0.7	3.65	1	17	25	Amidation
18	60		Kinin	L.RNGNGNGPPFFPWG(-.98).G	1020000	986000	1550000	2790000	3430000	3900000	N	Y	3.69	12.24	0.5	5.05	1	118	131	Amidation
13	6	Myosuppressin (MS)	MyosuppressinB	R.PDVDHVFLRF(-.98).G	627000	1360000	886000	3660000	4220000	4540000	N	Y	2.97	24.5	1.9	53.37	3	79	88	Amidation
13	6		MyosuppressinB	R.PDVDHVFLR.F	67100000	37000000	44200000	99700000	84300000	89400000	Y	Y	13.51	7.29	1.1	1.93	3	79	87
13	6		MyosuppressinB	R.PDVDHVFL.R	46000000	79400000	31700000	94300000	92800000	122000000	N	Y	11.09	14.82	1.9	3.96	3	79	86
13	6		MyosuppressinB	R.EDVGHVFLRF(-.98).G	230000	769000	0	189000	221000	271000	N	Y	1.22	7.63	4.8	21.58	2	176	185	Amidation
13	6		MyosuppressinB	R.EDVGHVFLR.F	8200000	6590000	6800000	12100000	10400000	11800000	N	Y	8.61	10.52	1	2.1	1	176	184
13	6		MyosuppressinB	R.EDVGHVF.L	34600000	30300000	32500000	82500000	79400000	78000000	Y	Y	27.6	29.57	0.8	8.21	1	176	182
49	175	NPF2	NPF2	F.YASLGRPRF(-.98).G	98500000	83400000	37000000	89800000	91200000	82200000	Y	Y	4.66	60	0.7	49.8	2	53	61	Amidation
2	7	Orcokinin	Orcokinin	K.SGLDSLSGATF(-.98).G	2240000	2610000	2900000	4800000	5780000	6600000	N	Y	6.02	24.98	1.2	10	1	76	86	Amidation
2	7		Orcokinin	K.NFDEIDRSGFS(-.98).G	27400000	30300000	28300000	73000000	70900000	80100000	N	Y	32.75	35.05	0.7	5.93	1	138	148	Amidation
2	7		Orcokinin	K.NFDEIDRSGFSG.F	42000000	84200000	65100000	66700000	84300000	119000000	N	Y	39.45	15.4	0.5	2.94	1	138	149
2	7		Orcokinin	N.FDEIDRSGFSG.F	22900000	24900000	19900000	39500000	41100000	49400000	Y	Y	29.91	31.8	0.9	5.37	1	139	149
2	7		Orcokinin	N.FDEIDRSGFS(-.98).G	7980000	7010000	6170000	20200000	18800000	19000000	N	Y	8.84	24.63	0.7	5.81	1	139	148	Amidation
2	7		Orcokinin	N.FDEIDRSGFNS.F	52100000	54300000	51400000	98600000	98300000	116000000	Y	Y	39.14	8.13	0.5	2.02	1	107	117
21	122	ILP	P15131.2	L.ARPSAGGLLTGAVF.R	0	0	310000	0	330000	270000	N	Y	2.38	8.38	1	11.38	1	104	117
21	122		P15131.2	L.ARPSAGGLLTG.A	9700000	9200000	9930000	21900000	21800000	19700000	Y	Y	8.86	23.02	0.6	5.42	1	104	114
21	122		P15131.2	A.RPSAGGLLTG.A	1390000	0	1190000	4560000	4400000	4260000	N	Y	5.76	10.45	1.2	3.76	1	105	114
20	127		P15131.2	T.Q(-17.03)AQSDLFLLSPK.R	919000	1090000	1040000	781000	913000	1170000	N	Y	2.09	5.53	4.9	5.35	1	21	32	Pyro-glu from Q
20	127		P15131.2	Q.SDLFLLSPK.R	17700000	15800000	13200000	9730000	9410000	10200000	N	Y	4.16	14.88	5.9	4.49	2	24	32
21	122		P15131.2	S.DLFLLSPK.R	4760000	4080000	3940000	26100000	26000000	24800000	N	Y	12.27	60	0.7	49.4	1	25	32
21	122		P15131.2	D.LFLLSPK.R	749000	0	515000	2930000	2520000	2680000	N	Y	5.09	21.48	0.9	5.96	1	26	32
21	122		P15131.2	L.FLLSPK.R	117000000	111000000	102000000	447000000	423000000	411000000	Y	Y	35.09	60	0.7	49.08	1	27	32
37	264	DH46	P23465.1	MGMGPSLS.I	11600000	6790000	8240000	17400000	16600000	18200000	Y	Y	4.01	41.71	0.8	29.61	1	1	8
37	264		P23465.1	R.DAEEQIKANKDF.L	4510000	4910000	4430000	11100000	12000000	11700000	Y	Y	3.99	57.59	4.2	60.09	1	31	42
70	11064	Pyrokinin2	P41488.1	Q(-17.03)SVPTFTPRL(-.98)	611000	1820000	1670000	1870000	2820000	3430000	Y	Y	5.13	5.91	1.4	1.81	1	1	10	Pyro-glu from Q; Amidation
65	2050	PVK3	P85867.1	DGGEPAAPLWFGPRV(-.98)	0	314000	441000	152000	433000	371000	Y	Y	3.02	24.13	0.8	28.4	1	1	15	Amidation
15	23	NPF1	P86442.1	L.DRYYSQVARPRF(-.98).G	212000000	214000000	183000000	408000000	379000000	407000000	Y	Y	35.96	60	0.6	26.86	2	49	60	Amidation
15	23		P86442.1	L.DRYYSQVARPRF.G	3410000	4550000	3650000	14800000	15600000	13100000	N	Y	4.93	60	1.2	29.44	1	49	60
15	23		P86442.1	L.DRYYSQVARPR.F	18300000	18800000	15900000	28800000	25600000	28600000	N	Y	6.11	60	1.3	35.21	1	49	59
15	23		P86442.1	Y.YSQVARPRF(-.98).G	716000000	848000000	748000000	1120000000	1680000000	1860000000	N	Y	25.88	60	1.8	64	2	52	60	Amidation
15	23		P86442.1	A.Q(-17.03)QADGNKLEGLADALK.Y	2950000	19900000	32900000	497000	1290000	606000	N	Y	3.02	58.63	1.3	64	1	28	43	Pyro-glu from Q
15	23		P86442.1	A.Q(-17.03)QADGNKLEGLADA.L	8370000	28800000	23700000	8750000	13000000	21900000	N	Y	5.16	60	1.7	27.55	1	28	41	Pyro-glu from Q
15	23		P86442.1	A.Q(-17.03)QADGNKLEGLAD.A	1980000	4300000	3130000	3130000	4050000	6290000	N	Y	3.21	27.51	3.3	7.52	1	28	40	Pyro-glu from Q
16	19	PDF	PDF	R.NSEIINSLLGLPK.L	5030000	6240000	6900000	3100000	3410000	3660000	N	Y	2.26	4.86	4.6	4.27	2	69	81
16	19		PDF	R.NSEIINSL.L	59700000	48800000	48000000	66000000	61400000	57300000	Y	Y	5.65	60	0.7	64	1	69	76
36	73	Proctolin	Proctolin	D.LVESERPAP.R	2290000	2340000	2140000	4860000	5490000	5340000	Y	Y	2.66	11.06	5.6	12.63	1	49	57
19	30	RYamide	RY	L.TIAQPESFALGSRY(-.98).G	1240000	2640000	2800000	6300000	7840000	11100000	N	Y	4.38	21.17	1	12.41	1	42	55	Amidation
19	30		RY	T.IAQPESFALGSRY(-.98).G	99200000	151000000	109000000	336000000	259000000	325000000	Y	Y	21.48	60	1.2	56.19	1	43	55	Amidation
19	30		RY	I.AQPESFALGSRY(-.98).G	9800000	5640000	4090000	18700000	16900000	16300000	N	Y	5.27	41.24	0.4	7.75	1	44	55	Amidation
19	30		RY	A.QPESFALGSRY(-.98).G	3430000	2980000	2530000	6510000	6080000	5680000	N	Y	5.75	4.76	0.9	2.13	1	45	55	Amidation
19	30		RY	S.FALGSRY(-.98).G	28700000	29200000	26200000	82900000	79000000	78400000	N	Y	13.64	60	0.6	29.11	1	49	55	Amidation
8	20	sNPF	SNPF	K.SNRSPSLRLRF(-.98).G	32100000	39200000	34400000	74900000	78500000	97900000	N	Y	3.28	6.69	0.6	4.84	1	64	74	Amidation
8	20		SNPF	S.NRSPSLRLRF(-.98).G	2110000	1650000	1130000	3450000	2890000	3970000	N	Y	2.74	7.17	0.7	6.47	1	65	74	Amidation
8	20		SNPF	K.SNRSPSLRLR.F	59200000	52000000	52900000	108000000	102000000	93700000	Y	Y	20.46	42.68	0.6	7.34	1	64	73
8	20		SNPF	S.NRSPSLRLR.F	10300000	9400000	8380000	11500000	11200000	11500000	N	Y	10.07	22.96	0.5	3.98	1	65	73
33	187	Sulfakinin	Sulfakinin	R.Q(-17.03)LASDDYGHMRF(-.98).G	808000	2690000	3160000	1540000	2120000	3020000	N	Y	3.97	60	1	5.39	2	12	23	Pyro-glu from Q; Amidation
33	187		Sulfakinin	R.Q(-17.03)PPAAPAAPASVPVAPR.F	1390000	10300000	6490000	3110000	5450000	11100000	Y	Y	2.54	2.87	3.9	2.41	3	27	43	Pyro-glu from Q
33	187		Sulfakinin	R.Q(-17.03)PPAAPAAPASVPVAP.R	193000	1610000	2260000	200000	555000	1300000	N	Y	3.7	15.39	0.8	3.02	1	27	42	Pyro-glu from Q
33	187		Sulfakinin	R.QPPAAPAAPASVPVAPR.F	2620000	3620000	2780000	5180000	5070000	5030000	N	Y	4.96	21.79	0.6	4.13	1	27	43
33	187		Sulfakinin	A.SDDYGHMRF(-.98).G	2370000	2060000	1810000	5200000	4730000	5220000	Y	Y	6.14	8.88	0.8	2.5	1	15	23	Amidation
33	187		Sulfakinin	R.FDDYGHFRF(-.98).G	1470000	1950000	1500000	635000	841000	1110000	Y	Y	2.01	2.14	6.5	2.3	2	44	52	Amidation
3	3	Tachykinin	Tachykinin	R.APMRGFQSVR.G	229000000	200000000	153000000	389000000	349000000	392000000	N	Y	28.88	13.42	0.8	2.69	2	111	120
3	3		Tachykinin	K.APLSGFYGVR(-.98).G	120000000	70900000	73800000	184000000	163000000	174000000	N	Y	37.4	8.59	0.9	2.08	1	213	222	Amidation
3	3		Tachykinin	K.APLSGFYGVR.G	14800000	10900000	10800000	22700000	20300000	22700000	N	Y	21.62	45.24	1	7.85	1	213	222
3	3		Tachykinin	P.LSGFYGVR(-.98).G	0	2140000	0	4200000	3820000	3550000	N	Y	3.83	4.79	0.4	2.75	1	215	222	Amidation
3	3		Tachykinin	K.APVGFYGTR(-.98).G	90700000	80300000	87700000	174000000	167000000	179000000	Y	Y	54.33	8.62	0.4	2.08	1	271	279	Amidation
3	3		Tachykinin	K.APVGFYGTR.G	6330000	6690000	6550000	14600000	13000000	12500000	N	Y	10.2	21.42	0.3	3.77	1	271	279
3	3		Tachykinin	R.APSLGFHGVR(-.98).G	55200000	58700000	30600000	47900000	45900000	44600000	N	Y	24.38	1.93	0.3	1.26	1	61	70	Amidation
3	3		Tachykinin	R.APSLGFHGVR.G	69400000	71000000	63600000	137000000	142000000	128000000	N	Y	38.34	8.39	0.5	2.06	1	61	70
3	3		Tachykinin	R.APSLGFHGVRG.K	4780000	3380000	3870000	7610000	7050000	6570000	N	Y	5.84	5.04	0.9	2.2	2	61	71
3	3		Tachykinin	A.PSLGFHGVR(-.98).G	3910000	3100000	1720000	3050000	2840000	2990000	N	Y	5.11	0.85	0.8	1.16	1	62	70	Amidation
3	3		Tachykinin	A.PSLGFHGVR.G	5000000	4640000	4570000	8820000	8000000	7560000	N	Y	8.47	7.28	0.8	1.78	1	62	70
3	3		Tachykinin	P.SLGFHGVR(-.98).G	0	2490000	2400000	3620000	3870000	3820000	N	Y	3.31	1.64	4.3	1.67	2	63	70	Amidation
3	3		Tachykinin	P.SLGFHGVR.G	11600000	11700000	11300000	27800000	24000000	24100000	N	Y	10.25	19.6	0.6	3.51	2	63	70
3	3		Tachykinin	S.LGFHGVR.G	0	0	2280000	6130000	5640000	6150000	N	Y	6.91	23.53	1.9	5.56	1	64	70
3	3		Tachykinin	R.GNTKKAPVGFYGTR(-.98).G	70800000	59300000	60400000	165000000	169000000	169000000	N	Y	15.52	40.65	0.7	6.98	3	266	279	Amidation
3	3		Tachykinin	R.GNTKKAPVGFYGTR.G	4320000	3860000	3500000	9100000	10000000	8270000	N	Y	5.83	6.06	0.9	2.47	1	266	279
3	3		Tachykinin	R.ALKGFFGTR(-.98).G	36900000	29700000	22900000	59100000	59100000	53400000	N	Y	10.69	15.34	1	2.95	1	176	184	Amidation
3	3		Tachykinin	R.ALKGFFGTR.G	1790000	1710000	1640000	4220000	4920000	4220000	N	Y	5.39	41.92	0.6	14.12	1	176	184
3	3		Tachykinin	K.APQAGFYGVR(-.98).G	99600000	104000000	89000000	182000000	179000000	176000000	Y	Y	45.98	7.05	0.5	1.89	1	188	197	Amidation
3	3		Tachykinin	K.APSAGFHGVR.G	0	862000	0	0	1440000	0	N	Y	4.66	8.86	0.5	3.06	1	226	235
3	3		Tachykinin	K.APQAGFYGVRG.K	2340000	2610000	2240000	3090000	3140000	3010000	N	Y	5.22	1.53	1.7	1.29	1	188	198
3	3		Tachykinin	K.APQAGFYGVR.G	16400000	10200000	14300000	31100000	32600000	31900000	N	Y	27.46	52.2	0.9	9.34	1	188	197
3	3		Tachykinin	A.Q(-17.03)RQEAGEPRAAAPFL.G	5760000	21400000	14500000	11200000	14900000	22300000	N	Y	5.59	29.44	0.9	12.75	1	22	36	Pyro-glu from Q
3	3		Tachykinin	R.APMRGFQSVR(-.98).G	71000000	80700000	88800000	158000000	144000000	132000000	N	Y	20.61	7.72	0.8	1.97	2	111	120	Amidation
3	3		Tachykinin	K.GPSGFYGVR(-.98).G	46700000	43900000	46300000	93500000	89000000	92600000	Y	Y	47.3	9.62	0.6	2.21	1	201	209	Amidation

## Sheet: peptide-retrocerebral complex
Protein Group	Protein ID		Protein Accession	Peptide	5th-1	5th-2	5th-3	A-1	A-2	A-3	Used	Candidate	Quality	Significance	Avg. ppm	Max Ratio	#Vector	Start	End	PTM
34	207	DH31	AKN21237.1	R.GLDLGINRGFSGAQAA.K	1600000	2010000	2160000	980000	801000	919000	Y	Y	4.07	31.7	1.1	12.84	1	70	85
34	207		AKN21237.1	L.DLGINRGFSGAQAA.K	3680000	3750000	3480000	356000	520000	366000	N	Y	3.93	30.91	0.8	12.49	1	72	85
34	207		AKN21237.1	M.GLAAAQYAAGP(-.98).G	1240000	1060000	880000	4270000	4230000	4720000	Y	Y	5.1	16.44	0.5	4.17	1	90	100	Amidation
37	57		AKN21237.1	A.KHLMGLAAAQYAAGP(-.98).G	0	236000	0	800000	624000	606000	N	Y	2.36	9.32	5.7	15.87	1	86	100	Amidation
37	57		AKN21237.1	K.HLMGLAAAQYAAGP(-.98).G	171000	242000	189000	98700	256000	0	N	Y	1.75	4.08	7.7	6.85	1	87	100	Amidation
37	171	CCAP	CCAP	R.DMDSPFLDR.L	1530000	1650000	1890000	4600000	4730000	4610000	Y	Y	6.18	60	0.6	5.34	1	32	40
37	171		CCAP	D.MDSPFLDRL.F	184000	165000	0	1810000	1880000	2060000	Y	Y	3.03	16.53	1.4	15.44	1	33	41
37	171		CCAP	D.MDSPFLDR.L	0	1090000	942000	2160000	2060000	2100000	N	Y	4.01	15.42	0.5	8.11	1	33	40
37	171		CCAP	M.DSPFLDR.L	1760000	1510000	1410000	622000	610000	572000	N	Y	6.08	60	1.1	4.43	1	34	40
40	31		CCAP	D.SPFLDRL.F	714000	604000	602000	1160000	1380000	1340000	Y	Y	4.27	6.01	0.7	3.32	1	35	41
40	31		CCAP	M.DSPFLDRL.F	193000	0	0	879000	897000	878000	N	Y	4.97	9.69	2.2	6.35	1	34	41
10	71	AST-A	AKN21241.1	R.LPVYNFGL(-.98).G	6060000	7530000	6910000	7450000	8730000	9220000	N	Y	5.71	25.66	0.7	1.43	1	103	110	Amidation
10	71		AKN21241.1	L.PVYNFGL(-.98).G	331000	404000	382000	1220000	1320000	1530000	N	Y	4.53	11.19	0.8	7.27	1	104	110	Amidation
10	71		AKN21241.1	R.GPRTYSFGL(-.98).G	10000000	8800000	9000000	41600000	41700000	42400000	Y	Y	12.46	60	0.6	5.55	1	129	137	Amidation
10	71		AKN21241.1	R.ATGANALYSFGL(-.98).G	5350000	6380000	5020000	9920000	11300000	10900000	N	Y	5.58	14.3	0.8	2.46	1	114	125	Amidation
10	71		AKN21241.1	R.VRPYSFGL(-.98).G	8560000	7090000	6750000	18500000	19300000	21200000	Y	Y	10.33	60	0.8	4.7	1	207	214	Amidation
10	71		AKN21241.1	V.RPYSFGL(-.98).G	1140000	1150000	1060000	10700000	9820000	10400000	N	Y	8.23	60	0.9	9.23	1	208	214	Amidation
10	71		AKN21241.1	R.APAEHRFSFGL(-.98).G	7910000	7540000	8370000	33600000	34800000	36900000	N	Y	7.93	60	0.6	4.42	2	262	272	Amidation
10	71		AKN21241.1	R.APAEHRFSFG.L	1150000	988000	917000	1250000	1090000	1160000	N	Y	3.26	1.03	5.7	1.35	1	262	271
10	71		AKN21241.1	R.RFSFGL(-.98).G	4110000	4110000	3890000	11200000	11700000	12000000	N	Y	6.25	60	0.6	2.88	1	253	258	Amidation
10	71		AKN21241.1	R.AGPATSRLYSFGL(-.98).G	9670000	10500000	9360000	23900000	26200000	25200000	N	Y	8	60	0.5	2.55	1	218	230	Amidation
10	71		AKN21241.1	R.AGPATSRLYSFG.L	335000	758000	629000	4050000	3960000	3990000	N	Y	3.44	12.65	1.7	7.29	1	218	229
10	71		AKN21241.1	S.RLYSFGL(-.98).G	549000	520000	451000	2170000	2200000	2120000	N	Y	4.75	15.32	0.4	9.68	1	224	230	Amidation
10	71		AKN21241.1	R.AGPATSRLYS.F	6130000	4330000	4540000	3610000	1930000	1000000	N	Y	4.6	7.21	1.7	4.33	1	218	227
10	71		AKN21241.1	R.AGPATSRLY.S	10300000	7700000	7130000	16000000	6820000	3850000	N	Y	5.31	39.32	0.9	10.4	1	218	226
10	71		AKN21241.1	E.GRLYSFGL(-.98).G	7520000	6420000	6700000	13600000	14300000	14100000	Y	Y	10.22	60	0.6	2.87	1	235	242	Amidation
10	71		AKN21241.1	E.GRLYSFG.L	1940000	1790000	1940000	1260000	1200000	694000	N	Y	4.11	12.86	0.3	4.31	1	235	241
10	71		AKN21241.1	P.AEHRFSFGL(-.98).G	1030000	1030000	1020000	15400000	15700000	15100000	N	Y	4.95	34.92	0.7	14.98	2	264	272	Amidation
10	71		AKN21241.1	A.EHRFSFGL(-.98).G	885000	774000	1090000	4910000	4860000	4670000	N	Y	4.15	9.55	1.9	5.25	1	265	272	Amidation
10	71		AKN21241.1	R.PLYGGDRRFSFGL(-.98).G	872000	1260000	1630000	4820000	5250000	4310000	N	Y	5.36	17.72	0.6	4.27	1	246	258	Amidation
10	71		AKN21241.1	K.RLPVYNFGL(-.98).G	1300000	1580000	1710000	2280000	2420000	2600000	N	Y	5.4	30.33	1	4.34	1	102	110	Amidation
10	71		AKN21241.1	R.EGRLYSFGLG.K	3940000	3970000	3640000	6620000	6750000	7230000	N	Y	7.06	50.78	0.9	1.78	1	234	243
10	71		AKN21241.1	R.AYTYVSEYK.R	685000	570000	630000	2840000	3110000	2770000	N	Y	5.18	32.39	0.6	8.12	1	93	101
46	202	Pyrokinin 4	AYC12050.1	R.DGGQPAAPLWFGPRV(-.98).G	2270000	743000	863000	903000	0	628000	Y	Y	2.67	11.37	0.6	9.51	1	144	158	Amidation
46	202		AYC12050.1	K.GDFTPRL(-.98).G	7580000	2140000	1660000	1570000	6500000	6130000	N		9.83	60	0.6	8.23	1	243	249	Amidation
46	202		AYC12050.1	G.DFTPRL(-.98).G	38800000	51400000	47500000	46000000	25200000	24600000	N		16.36	60	0.9	1.94	1	244	249	Amidation
17	81		AYC12054.1	R.NQAEPGVWFGARI(-.98).G	4070000	1670000	2350000	2660000	3350000	3510000	N		4.83	6.7	1.9	2.91	1	205	217	Amidation
17	81		AYC12054.1	N.QAEPGVWFGARI(-.98).G	1040000	147000	404000	382000	849000	929000	N		2.92	9.85	2.2	6.22	1	206	217	Amidation
17	81		AYC12054.1	Q.AEPGVWFGARI(-.98).G	1550000	1190000	1630000	1790000	925000	947000	N		4.13	4.52	1	2.22	1	207	217	Amidation
17	81		AYC12054.1	R.NQPEPGTWFGARI(-.98).G	35600000	12700000	18400000	18000000	32700000	34000000	N		8.58	60	0.7	3.47	2	220	232	Amidation
17	81		AYC12054.1	N.QPEPGTWFGARI(-.98).G	1510000	490000	685000	667000	1400000	1290000	N		4.56	7	0.7	4.2	1	221	232	Amidation
17	81		AYC12054.1	P.EPGTWFGPRI(-.98).G	3360000	913000	1050000	1000000	2240000	2590000	N		3.56	13.6	1.4	6.73	2	148	157	Amidation
17	81		AYC12054.1	P.EPGTWFGARI(-.98).G	1370000	346000	419000	412000	1040000	961000	N		4.04	19.87	1.2	6.88	1	223	232	Amidation
17	81		AYC12054.1	R.SIPEPGTWFGPRI(-.98).G	6690000	1560000	2410000	3040000	7390000	8250000	N		3.97	12.31	1.9	4.16	2	145	157	Amidation
17	81		AYC12054.1	S.IPEPGTWFGPRI(-.98).G	4410000	1080000	1580000	1940000	4060000	3950000	N		4.2	9.47	1.2	5.19	2	146	157	Amidation
17	81		AYC12054.1	R.SHTEPGLWFGPRY(-.98).G	4240000	926000	1080000	972000	4640000	4440000	Y	Y	4.07	20.96	0.6	7.32	2	160	172	Amidation
17	81		AYC12054.1	H.TEPGLWFGPRY(-.98).G	1570000	1780000	2270000	1900000	936000	1040000	N	Y	3.7	3.43	1.2	2.05	1	162	172	Amidation
17	81		AYC12054.1	R.GHPEPEMWFGPRV(-.98).G	1180000	432000	485000	504000	1480000	1340000	Y	Y	4.13	8.12	0.9	3.41	1	190	202	Amidation
17	81		AYC12054.1	R.SYPEPGMWFGPRV(-.98).G	2470000	402000	266000	733000	2180000	2780000	N		3.93	25.46	1.3	9.48	1	175	187	Amidation
17	81		AYC12054.1	S.YPEPGMWFGPRV(-.98).G	1770000	458000	702000	836000	1510000	1660000	N		3.6	9.69	0.8	4.59	1	176	187	Amidation
17	81		AYC12054.1	P.EPGMWFGPRV(-.98).G	7520000	2460000	2560000	2590000	5280000	5480000	N		6.03	60	1.2	5.73	2	178	187	Amidation
14	64		AYC12055.1	R.NQPEPGTWFGARI(-.98).G	35600000	12700000	18400000	18000000	32700000	34000000	N		8.58	60	0.7	3.47	2	220	232	Amidation
14	64		AYC12055.1	N.QPEPGTWFGARI(-.98).G	1510000	490000	685000	667000	1400000	1290000	N		4.56	7	0.7	4.2	1	221	232	Amidation
14	64		AYC12055.1	R.NQAEPGVWFGARI(-.98).G	4070000	1670000	2350000	2660000	3350000	3510000	N		4.83	6.7	1.9	2.91	1	205	217	Amidation
14	64		AYC12055.1	R.SQAEPGAWFGARI(-.98).G	7110000	1000000	1390000	1390000	6240000	7170000	Y	Y	4.74	16.22	0.9	10.51	2	295	307	Amidation
14	64		AYC12055.1	R.SQAEPGVWFGARI(-.98).G	2920000	735000	801000	1130000	2940000	3200000	N	Y	3.53	11.19	1.5	5.36	1	250	262	Amidation
14	64		AYC12055.1	N.QAEPGVWFGARI(-.98).G	1040000	147000	404000	382000	849000	929000	N		2.92	9.85	2.2	6.22	1	206	217	Amidation
14	64		AYC12055.1	Q.AEPGAWFGARI(-.98).G	2200000	1700000	2210000	2030000	1510000	1610000	N	Y	5.03	5.69	0.5	2	1	297	307	Amidation
14	64		AYC12055.1	Q.AEPGVWFGARI(-.98).G	1550000	1190000	1630000	1790000	925000	947000	N		4.13	4.52	1	2.22	1	207	217	Amidation
14	64		AYC12055.1	P.EPGTWFGARI(-.98).G	1370000	346000	419000	412000	1040000	961000	N		4.04	19.87	1.2	6.88	1	223	232	Amidation
14	64		AYC12055.1	P.EPGTWFGPRI(-.98).G	3360000	913000	1050000	1000000	2240000	2590000	N		3.56	13.6	1.4	6.73	2	148	157	Amidation
14	64		AYC12055.1	R.SIPEPGTWFGPRI(-.98).G	6690000	1560000	2410000	3040000	7390000	8250000	N		3.97	12.31	1.9	4.16	2	145	157	Amidation
14	64		AYC12055.1	S.IPEPGTWFGPRI(-.98).G	4410000	1080000	1580000	1940000	4060000	3950000	N		4.2	9.47	1.2	5.19	2	146	157	Amidation
14	64		AYC12055.1	R.SHPEPGMWFGPRV(-.98).G	15100000	7540000	7470000	7250000	14000000	14000000	Y	Y	5.51	20.39	1.5	3.18	3	280	292	Amidation
14	64		AYC12055.1	R.SHPEPGTWFGPRI(-.98).G	4640000	1310000	2220000	1940000	4190000	4620000	Y	Y	5.06	14.21	0.8	3.68	2	340	352	Amidation
14	64		AYC12055.1	P.EPGMWFGPRV(-.98).G	7520000	2460000	2560000	2590000	5280000	5480000	N		6.03	60	1.2	5.73	2	178	187	Amidation
14	64		AYC12055.1	R.SYPEPGMWFGPRV(-.98).G	2470000	402000	266000	733000	2180000	2780000	N		3.93	25.46	1.3	9.48	1	175	187	Amidation
14	64		AYC12055.1	S.YPEPGMWFGPRV(-.98).G	1770000	458000	702000	836000	1510000	1660000	N		3.6	9.69	0.8	4.59	1	176	187	Amidation
14	64		AYC12055.1	R.GHPEPGMWFGPRV(-.98).G	1820000	844000	942000	866000	1580000	1560000	N	Y	5.58	22.97	0.7	3.36	1	190	202	Amidation
14	64		AYC12055.1	G.HPEPGMWFGPRV(-.98).G	15000000	6650000	7890000	6690000	15500000	14400000	N	Y	4.66	6.76	0.7	3.3	3	191	202	Amidation
14	64		AYC12055.1	G.HPEPGMWFGP.R	1440000	799000	810000	911000	1260000	1820000	N	Y	4.02	5.3	0.8	2.2	1	191	200
6+9973:106	7	ILP	P15131.2	S.TATQAQSDLFLLSPK.R	1380000	1520000	1430000	2820000	3150000	2970000	N	Y	4.05	4.73	1.1	2.06	1	18	32
6	7		P15131.2	A.TQAQSDLFLLSPK.R	2840000	3100000	2940000	5520000	5880000	5610000	N	Y	5.91	60	1	1.92	1	20	32
6	7		P15131.2	T.Q(-17.03)AQSDLFLLSPK.R	40600000	59500000	64000000	15500000	14600000	13700000	N	Y	5.57	60	0.7	26.66	1	21	32	Pyro-glu from Q
6	7		P15131.2	A.Q(-17.03)SDLFLLSPK.R	1990000000	2100000000	2300000000	894000000	879000000	894000000	N	Y	14.84	60	1.4	16.71	1	23	32	Pyro-glu from Q
6	7		P15131.2	A.QSDLFLLSPK.R	194000000	177000000	216000000	98100000	91800000	76200000	N	Y	8.18	60	0.8	15.18	1	23	32
6	7		P15131.2	Q.AQSDLFLLSPK.R	18100000	18800000	19200000	45500000	50300000	47800000	N	Y	13.03	60	0.3	2.56	1	22	32
6	7		P15131.2	Q.AQSDLFL.L	150000	127000	0	3820000	4170000	3970000	N	Y	2.55	23.38	5.8	28.84	1	22	28
6	7		P15131.2	Q.SDLFLLSPK.R	51900000	57500000	54200000	55200000	59000000	59900000	N	Y	16.65	2.44	0.6	1.06	1	24	32
6	7		P15131.2	S.DLFLLSPK.R	508000000	324000000	384000000	1280000000	1380000000	1470000000	N	Y	35.54	60	1	3.4	1	25	32
6	7		P15131.2	S.DLFLLSP.K	9790000	9750000	9560000	6920000	8760000	8120000	N	Y	5.39	50.73	0.9	7.19	1	25	31
6	7		P15131.2	D.LFLLSPK.R	5310000	4870000	4980000	24200000	24400000	25800000	N	Y	6.29	60	0.6	9.92	1	26	32
6	7		P15131.2	L.FLLSPK.R	59500000	56100000	57500000	1790000000	1770000000	1920000000	Y	Y	39.73	60	0.6	36.81	1	27	32
6	7		P15131.2	L.FLLSP.K	14900000	14600000	15200000	188000000	203000000	189000000	N	Y	6.46	60	0.3	12.99	1	27	31
6	7		P15131.2	I.LARPSAGGLLTGAVF.R	654000	1080000	1240000	1620000	1770000	1830000	N	Y	3.79	6.27	0.6	2.77	1	103	117
6	7		P15131.2	L.ARPSAGGLLTGAVF.R	787000	905000	1040000	30600000	34100000	35700000	N	Y	6.54	60	1.5	36.73	1	104	117
6	7		P15131.2	A.RPSAGGLLTGAVF.R	938000	1290000	1250000	41700000	45100000	44300000	N	Y	6.01	60	1.5	37.77	1	105	117
6	7		P15131.2	I.LARPSAGGLLTG.A	34600000	33600000	31800000	3200000	3410000	4030000	N	Y	7	60	0.8	12.75	1	103	114
6	7		P15131.2	L.ARPSAGGLLTG.A	12000000	10600000	9050000	40700000	44500000	41800000	N	Y	10.47	60	0.8	4.47	1	104	114
6	7		P15131.2	L.ARPSAGGLLT.G	2360000	2150000	2100000	26500000	23800000	24000000	N	Y	8.4	60	0.8	11.27	1	104	113
6	7		P15131.2	L.ARPSAGGLL.T	4480000	4050000	3680000	11100000	12000000	12900000	N	Y	7.25	60	1.8	2.95	1	104	112
6	7		P15131.2	A.RPSAGGLLTG.A	18000000	16100000	15200000	36100000	30800000	31400000	Y	Y	17.68	60	0.2	2.53	1	105	114
6	7		P15131.2	A.RPSAGGLLT.G	2080000	1700000	1660000	35400000	33000000	29600000	N	Y	8.23	60	1.2	18	1	105	113
6	7		P15131.2	R.PSAGGLLTGAVF.R	1360000	1630000	1740000	17400000	17100000	16300000	N	Y	6.71	60	0.9	10.73	1	106	117
6	7		P15131.2	P.SAGGLLTGAVF.R	0	147000	154000	1410000	1830000	1890000	N	Y	3.51	28.39	1.1	26.65	1	107	117
6	7		P15131.2	S.AGGLLTGAVF.R	850000	856000	896000	1880000	1960000	2290000	N	Y	5.43	13.37	0.7	2.42	1	108	117
6	7		P15131.2	R.SGAPQPVARYCGEKLSNALK.L	0	925000	1080000	22000000	22800000	25000000	N	Y	3.43	26.38	0.4	23.19	1	34	53
6	7		P15131.2	R.SGAPQPVARYCGEKLSN.A	2600000	2640000	2550000	3940000	3720000	4150000	N	Y	3.72	12.03	6.3	4.96	1	34	50
6	7		P15131.2	G.APQPVARYCGEKLSNALK.L	1250000	1590000	1720000	5690000	4640000	5000000	N	Y	4.94	9.71	1.1	3.36	1	36	53
6	7		P15131.2	G.APQPVARYCGEKLSN.A	290000	669000	553000	959000	1050000	1040000	N	Y	3.49	10.88	0.5	5.18	1	36	50
6	7		P15131.2	R.SGAPQPVARYC.G	7890000	6680000	6710000	7850000	7870000	7170000	Y	Y	8.83	60	1.3	2.79	1	34	44
6	7		P15131.2	G.APQPVARYC.G	19200000	15100000	15800000	1780000	1800000	0	N	Y	3.59	35.15	0.7	30.51	1	36	44
6	7		P15131.2	C.GEKLSNALKL.V	9830000	7890000	8120000	7900000	7200000	6140000	N	Y	7.21	12.21	0.5	1.28	2	45	54
6	7		P15131.2	C.RGNYNTMF.K	3790000	3640000	3730000	6640000	6260000	5430000	N	Y	8.34	60	0.5	2.79	1	57	64
6	7		P15131.2	K.LVCRGNYNTM.F	995000	978000	818000	3850000	3570000	4120000	N	Y	3.56	8.75	1	4.13	1	54	63
20	68	MIP (AST-B)	AKN21242.1	R.GWRDLQSAW(-.98).G	6020000	7030000	8140000	15600000	16600000	17300000	Y	Y	8.48	60	1	4.44	1	61	69	Amidation
20	68		AKN21242.1	G.WRDLQSAW(-.98).G	1120000	1080000	981000	2780000	2790000	2930000	N	Y	4.31	9.7	1	5.25	1	62	69	Amidation
20	68		AKN21242.1	A.WQDLGSAW(-.98).G	4500000	4530000	3580000	5250000	6220000	5790000	N	Y	5.87	36.13	0.5	1.58	1	2	9	Amidation
20	68		AKN21242.1	R.AWSSLHGAW(-.98).G	3750000	3620000	1050000	7710000	7700000	8520000	N	Y	4.73	13.36	1.4	7.98	1	137	145	Amidation
20	68		AKN21242.1	R.AWSNLNGAW(-.98).G	1290000	1350000	1510000	1790000	1930000	1950000	N	Y	5.94	60	1.2	4.74	1	73	81	Amidation
20	68		AKN21242.1	R.AWQDLNAGW(-.98).G	4980000	5640000	7020000	7960000	9000000	8860000	Y	Y	7.4	60	0.7	2.64	1	25	33	Amidation
20	68		AKN21242.1	A.WQDLNAGW(-.98).G	2900000	3070000	3340000	2640000	2830000	2830000	N	Y	6.42	27.35	0.3	1.47	1	26	33	Amidation
20	68		AKN21242.1	R.EPGWTNLKGLW(-.98).G	567000	914000	1140000	6040000	6360000	6040000	N	Y	5.98	60	1.1	20.47	1	163	173	Amidation
20	68		AKN21242.1	R.EPGWTNLKG.L	2090000	1610000	1780000	4450000	3950000	3530000	N	Y	6.05	60	0.6	5.57	1	163	171
20	68		AKN21242.1	R.EPGWTNLK.G	5710000	5140000	5250000	3730000	3550000	3380000	N	Y	5.95	60	0.6	2.97	1	163	170
20	68		AKN21242.1	P.GWTNLKGLW(-.98).G	226000	219000	369000	2140000	2160000	2200000	N	Y	3.9	36.01	0.9	23.4	1	165	173	Amidation
20	68		AKN21242.1	R.AGPSNWNRLPAVW(-.98).G	1830000	2510000	3190000	6030000	7420000	6750000	N	Y	5.4	44.3	0.5	6.22	1	177	189	Amidation
20	68		AKN21242.1	R.AGPSNWNRLPAV.W	611000	591000	649000	1680000	1560000	1750000	N	Y	3.7	14.75	1.5	6.25	1	177	188
20	68		AKN21242.1	R.AGPSNWNRLPA.V	1370000	1270000	1280000	6060000	5490000	5920000	Y	Y	6.24	60	1.2	6.04	1	177	187
20	68		AKN21242.1	R.AGPSNWNRLP.A	526000	0	545000	2800000	2500000	2880000	N	Y	4.33	9.42	1	5.09	1	177	186
20	68		AKN21242.1	A.DWRAFHGSW(-.98).G	842000	849000	745000	1640000	1440000	1760000	N	Y	4.7	7.2	10.2	3.49	1	151	159	Amidation
21	266	NPLP-1	AKN21246.1	R.SVASLARAGALLP(-.98).G	1270000	1520000	1420000	1890000	2170000	2170000	Y	Y	5.12	41.23	0.8	11.93	1	153	165	Amidation
21	266		AKN21246.1	R.SVGALARSGLLPQP(-.98).G	1730000	1990000	1860000	1650000	1720000	1790000	Y	Y	5.8	60	0.7	7.45	1	195	208	Amidation
21	266		AKN21246.1	R.SLASLMRSRGPSPVE.K	559000	532000	537000	849000	854000	854000	N	Y	3.55	21.61	0.9	12.87	1	285	299
21	266		AKN21246.1	A.DPGDAVSVSVP(-.98).G	3030000	3220000	3140000	1820000	1930000	1650000	N	Y	4.5	7.6	0.7	4.58	1	26	36	Amidation
21	266		AKN21246.1	R.YLASVLRQ(-.98).G	1560000	1350000	1400000	1350000	1190000	1090000	Y	Y	5.34	30.78	0.6	7.62	1	359	366	Amidation
21	266		AKN21246.1	R.NVGALARNWMLPS(-.98).G	710000	1020000	1090000	831000	886000	846000	N	Y	3.36	14	1.5	8.32	1	330	342	Amidation
21	266		AKN21246.1	A.RDYSLPSY(-.98).G	6080000	5190000	5070000	897000	898000	826000	N	Y	2.91	13.32	2.3	9.33	1	243	250	Amidation
21	266		AKN21246.1	K.SSRSAGSDGQAFLQQQQQQQQEAGSKRT.K	1150000	979000	1140000	1090000	929000	861000	N	Y	3.34	13.87	1.6	8.21	1	405	432
21	266		AKN21246.1	R.HLGSLAKSGMAIH.K	1330000	977000	939000	1570000	1580000	1680000	N	Y	3.97	15.26	1.1	6.5	1	390	402
11	19	OMP	P80045.1	F.AAAAAAAADAQFQDEEEDGGRRV	6010000	7550000	7540000	49300000	56800000	62500000	N		6.42	60	1	14.81	2	43	65
11	19		P80045.1	A.AAAAADAQFQDEEEDGGRRV	1880000	2060000	0	1980000	2010000	1930000	N		4.46	2.93	0.6	1.99	1	46	65
11	19		P80045.1	A.AAAAAADAQFQDEEEDGGRRV	9310000	8760000	9690000	4090000	4540000	4290000	N		7.61	60	0.5	2.15	1	45	65
11	19		P80045.1	A.AAAADAQFQDEEEDGGRRV	6890000	7180000	6100000	1710000	2210000	1990000	N		4.58	5.64	0.7	3.41	1	47	65
11	19		P80045.1	A.AAADAQFQDEEEDGGRRV	9840000	10100000	9290000	2450000	2790000	0	N		5.81	60	1.5	3.72	1	48	65
11	19		P80045.1	A.AADAQFQDEEEDGGRRV	3680000	3140000	3060000	1160000	1330000	1050000	N		5.56	17.53	0.7	2.79	1	49	65
11	19		P80045.1	A.ADAQFQDEEEDGGRRV	1680000	1610000	1480000	3450000	2550000	2530000	N		5.62	16.08	0.9	2.64	1	50	65
11	19		P80045.1	A.DAQFQDEEEDGGRRV	2550000	2390000	2360000	1890000	1850000	1750000	N		5.5	18.77	0.7	3	1	51	65
11	19		P80045.1	D.AQFQDEEEDGGRRV	3930000	3240000	3300000	7370000	6440000	6600000	N		5	22.74	1.6	5.74	1	52	65
11	19		P80045.1	V.APAAPASWPHQQ.R	30400000	25700000	28200000	601000	459000	644000	N	Y	3.72	52.5	1.3	49.59	1	23	34
11	19		P80045.1	A.QFQDEEEDGGRRV	1280000	1350000	1050000	4380000	4400000	4290000	N		5.06	43.59	0.7	13.06	1	53	65
11	19		P80045.1	P.AAPASWPHQQ.R	5840000	5440000	5220000	1420000	1040000	783000	Y	Y	5.92	60	0.4	5.09	1	25	34
11	19		P80045.1	R.RQALDEFAAAAAAAADAQ.F	0	174000	185000	1940000	2470000	2610000	N		3.7	48.75	0.4	64	1	36	53
11	19		P80045.1	F.AAAAAAAADAQF.Q	1380000	1240000	1040000	383000	413000	442000	N		2.47	6.02	1.1	3.91	1	43	54
11	19		P80045.1	R.RQALDEF.A	4010000	3540000	3740000	884000	906000	1010000	N		6.22	60	0.7	4.03	1	36	42
11	19		P80045.1	YYEAPPDGR.H	43900000	37000000	34500000	25100000	20600000	11800000	N		19.73	60	0.7	2.01	1	1	9
12	31		AAB20875.1	P.APAAPAVAPASPASWPHQQRRQ.A	45500000	57600000	58600000	2390000	2920000	3560000	Y	Y	2.37	24.42	0.9	48.25	1	16	37
12	31		AAB20875.1	F.AAAAAAAADAQFQDEEEDGGRRV	6010000	7550000	7540000	49300000	56800000	62500000	N		6.42	60	1	14.81	2	43	65
12	31		AAB20875.1	F.AAAAAAAADAQF.Q	1380000	1240000	1040000	383000	413000	442000	N		2.47	6.02	1.1	3.91	1	43	54
12	31		AAB20875.1	R.RQALDEFAAAAAAAADAQ.F	0	174000	185000	1940000	2470000	2610000	N		3.7	48.75	0.4	64	1	36	53
12	31		AAB20875.1	A.AAAAAADAQFQDEEEDGGRRV	9310000	8760000	9690000	4090000	4540000	4290000	N		7.61	60	0.5	2.15	1	45	65
12	31		AAB20875.1	A.AAAADAQFQDEEEDGGRRV	6890000	7180000	6100000	1710000	2210000	1990000	N		4.58	5.64	0.7	3.41	1	47	65
12	31		AAB20875.1	A.AAADAQFQDEEEDGGRRV	9840000	10100000	9290000	2450000	2790000	0	N		5.81	60	1.5	3.72	1	48	65
12	31		AAB20875.1	A.AADAQFQDEEEDGGRRV	3680000	3140000	3060000	1160000	1330000	1050000	N		5.56	17.53	0.7	2.79	1	49	65
12	31		AAB20875.1	A.ADAQFQDEEEDGGRRV	1680000	1610000	1480000	3450000	2550000	2530000	N		5.62	16.08	0.9	2.64	1	50	65
12	31		AAB20875.1	A.DAQFQDEEEDGGRRV	2550000	2390000	2360000	1890000	1850000	1750000	N		5.5	18.77	0.7	3	1	51	65
12	31		AAB20875.1	D.AQFQDEEEDGGRRV	3930000	3240000	3300000	7370000	6440000	6600000	N		5	22.74	1.6	5.74	1	52	65
12	31		AAB20875.1	A.QFQDEEEDGGRRV	1280000	1350000	1050000	4380000	4400000	4290000	N		5.06	43.59	0.7	13.06	1	53	65
23	72	AKH2	P08379.3	A.Q(-17.03)LNFSAGWGR.R	1050000	1290000	1450000	10700000	11400000	10500000	Y	Y	6.52	60	0.6	8.58	1	23	32	Pyro-glu from Q
23	72		P08379.3	A.Q(-17.03)LNFSAGWGRR.Y	1680000	1980000	2430000	6130000	6500000	6380000	N	Y	5.74	60	0.5	3.13	1	23	33	Pyro-glu from Q
20	160		P08379.3	A.Q(-17.03)LNFSAGWG.R	272000	261000	402000	2070000	1160000	1750000	N	Y	2.15	4.37	7.1	5.45	1	23	31	Pyro-glu from Q
20	160		P08379.3	A.Q(-17.03)LNFSAGW(-.98).G	92300	97300	0	23500000	247000	281000	N	Y	2.42	20.04	0.7	64	1	23	30	Pyro-glu from Q; Amidation
20	160		P08379.3	A.QLNFSAGWGR.R	405000	513000	526000	697000	763000	816000	N	Y	4.77	1.91	1.1	1.65	1	23	32
23	72		P08379.3	A.Q(-17.03)LNFSA.G	34000000	38800000	36300000	22100000	23200000	21900000	N	Y	5.81	47.87	0.4	1.62	1	23	28	Pyro-glu from Q
25	162	NPF1	P86442.1	A.Q(-17.03)QADGNKLEGLADALK.Y	733000	1060000	1160000	3720000	3920000	3960000	Y	Y	4.98	53.99	1.6	32.13	1	28	43	Pyro-glu from Q
25	162		P86442.1	L.QELDRYYSQVARPRF(-.98).G	1190000	1280000	1250000	570000	706000	831000	N	Y	2.66	3.18	9	2.43	1	46	60	Amidation
25	162		P86442.1	Y.YSQVARPRF(-.98).G	0	709000	568000	40000000	35500000	34500000	Y	Y	7.15	60	1.3	64	1	52	60	Amidation
40	158	ACP	ACP	S.Q(-17.03)VTFSRDWSP(-.98).G	183000000	216000000	212000000	1380000000	1500000000	1530000000	Y	Y	52.06	60	0.9	8.06	1	22	31	Pyro-glu from Q; Amidation
40	158		ACP	S.Q(-17.03)VTFSRDWSP.G	6990000	9090000	9140000	66100000	83400000	78300000	N	Y	10.56	60	0.7	9.03	1	22	31	Pyro-glu from Q
40	158		ACP	S.QVTFSRDWSP(-.98).G	9130000	10300000	10400000	76100000	61000000	60800000	N	Y	8.96	60	1	6.9	1	22	31	Amidation
40	158		ACP	Q.VTFSRDWSP(-.98).G	1090000	1710000	1020000	13600000	14500000	14900000	N	Y	7.68	60	0.6	15.56	1	23	31	Amidation
40	158		ACP	S.Q(-17.03)VTFSRD.W	628000	571000	523000	2490000	2450000	2640000	N	Y	4.81	12.01	3	5.9	1	22	28	Pyro-glu from Q
40	158		ACP	S.Q(-17.03)VTFSR.D	174000	151000	160000	845000	842000	1010000	N	Y	3.01	24.14	6.8	38.96	1	22	27	Pyro-glu from Q
40	158		ACP	T.FSRDWSP(-.98).G	2910000	2260000	2340000	83400000	81600000	85100000	N	Y	10.76	60	0.6	33.31	1	25	31	Amidation
72	181	ITP	ITP	S.SPLDAHHLA.K	56400000	40100000	36000000	41500000	36000000	24900000	N		15.74	60	0.8	2.31	1	43	51
72	181		ITP	W.IKQIHGAEPGV.Y	0	426000	430000	5190000	5150000	4380000	Y	Y	4.28	33.35	4.8	36.94	1	122	132
48	62	Sulfakinin	Sulfakinin	R.Q(-17.03)PPAAPAAPASVPVAPR.F	1820000	2010000	2150000	579000	751000	638000	Y	Y	3.58	13.04	1.7	6.42	1	27	43	Pyro-glu from Q
48	62		Sulfakinin	R.Q(-17.03)LASDDYGHMRF(-.98).G	10500000	11500000	12800000	7110000	7760000	7410000	Y	Y	6.36	60	0.9	2.69	2	12	23	Pyro-glu from Q; Amidation
48	62		Sulfakinin	R.Q(-17.03)LASDDYGHMR.F	3720000	3650000	3590000	1510000	1750000	1630000	N	Y	4.89	6.94	1.3	2.61	2	12	22	Pyro-glu from Q
48	62		Sulfakinin	A.SDDYGHMRF(-.98).G	3660000	2900000	2840000	436000	532000	566000	N	Y	2.26	7.48	7.9	6.57	1	15	23	Amidation
35	222	Tachykinin	Tachykinin	K.APQAGFYGVR(-.98).G	4640000	3900000	3570000	1630000	1630000	1630000	Y	Y	7.65	60	0.8	8.28	1	188	197	Amidation
35	222		Tachykinin	K.APLSGFYGVR(-.98).G	951000	3990000	4120000	1780000	1740000	1800000	Y	Y	5.61	57.7	2.4	7.91	1	213	222	Amidation
35	222		Tachykinin	R.APSLGFHGVR(-.98).G	1620000	1150000	1240000	625000	718000	625000	N	Y	4.34	12.8	0.7	7.37	1	61	70	Amidation
35	222		Tachykinin	K.GPSGFYGVR(-.98).G	2290000	1980000	1720000	1470000	745000	0	Y	Y	4.38	6.26	0.6	3.39	1	201	209	Amidation
35	222		Tachykinin	R.APMRGFQSVR(-.98).G	0	566000	486000	493000	389000	0	N	Y	3.63	14.97	0.9	6.23	1	111	120	Amidation
22	211	PVK	AYC12051.1	R.SAQPPGLWFGPRV(-.98).G	1420000	1640000	1810000	3700000	4140000	3620000	Y	Y	5.47	29.98	0.7	4.3	1	195	207	Amidation
22	211		AYC12051.1	S.AQPPGLWFGPRV(-.98).G	645000	650000	773000	1510000	1530000	1510000	N	Y	4.22	4.97	0.7	2.81	1	196	207	Amidation
22	211		AYC12051.1	A.QPPGLWFGPRV(-.98).G	1870000	2150000	2020000	1570000	1770000	1790000	N	Y	4.99	3.72	0.9	1.82	1	197	207	Amidation
22	211		AYC12051.1	Q.PPGLWFGPRV(-.98).G	2510000	2820000	2250000	1380000	1450000	1620000	N	Y	5.17	13.01	0.7	3.29	1	198	207	Amidation
22	211		AYC12051.1	R.SDAQVDDMLWFGPRP(-.98).G	408000	646000	865000	2360000	2620000	2380000	N	Y	4.27	11.26	0.8	6.27	1	211	225	Amidation
22	211		AYC12051.1	A.QVDDMLWFGPRP(-.98).G	256000	326000	435000	1270000	1360000	1330000	N	Y	3.58	16.08	1.6	8.39	1	214	225	Amidation
22	211		AYC12051.1	R.AAKQPALWFGPRV(-.98).G	4370000	5190000	4230000	7810000	7870000	8300000	Y	Y	4.24	5.86	0.8	3.2	2	152	164	Amidation
22	211		AYC12051.1	K.QPALWFGPRV(-.98).G	641000	802000	688000	430000	442000	461000	N	Y	3.37	9.45	1.5	5.11	1	155	164	Amidation
22	211		AYC12051.1	R.GAKHPGLWFGPRF(-.98).G	393000	360000	416000	449000	1810000	1620000	N	Y	2.6	8.72	1	6.58	1	248	260	Amidation
5	6	Myosuppressin (MS)	Myosuppressin	R.PDVDHVFLRF(-.98).G	31500000	42900000	43300000	117000000	109000000	137000000	N	Y	6.06	60	2	3.09	4	79	88	Amidation
5	6		Myosuppressin	R.PDVDHVFLRF.G	4430000	1510000	1520000	7500000	8050000	8340000	N	Y	4.32	4.56	3.8	2.62	2	79	88
5	6		Myosuppressin	R.PDVDHVFLR.F	211000000	244000000	223000000	257000000	237000000	314000000	Y	Y	23.63	60	1.1	1.9	4	79	87
5	6		Myosuppressin	R.PDVDHVFL.R	21600000	19900000	20700000	163000000	164000000	171000000	N	Y	8.89	60	0.8	8.61	2	79	86
5	6		Myosuppressin	R.PDVDHVF.L	15900000	14800000	14100000	365000000	341000000	348000000	N	Y	13.12	60	0.7	23.5	2	79	85
5	6		Myosuppressin	P.DVDHVFLR.F	935000	790000	844000	1350000	1120000	1210000	N	Y	3.87	3.14	2.7	1.83	1	80	87
5	6		Myosuppressin	R.EDVGHVFLRF(-.98).G	2740000	4170000	4250000	22400000	23000000	24000000	N	Y	5.99	60	0.7	6.22	2	176	185	Amidation
5	6		Myosuppressin	R.EDVGHVFLR.F	31800000	29800000	28100000	31400000	29700000	31900000	Y	Y	14.2	60	1.1	2.09	2	176	184
5	6		Myosuppressin	R.EDVGHVFL.R	3150000	3040000	2750000	22800000	22900000	22800000	N	Y	7.74	60	1.7	7.66	1	176	183
5	6		Myosuppressin	R.EDVGHVF.L	2800000	2480000	2350000	56600000	52500000	53600000	N	Y	13.64	60	0.6	21.33	1	176	182
13	13	Orcokinin A	Orcokinin	K.NFDEIDRSGFDRFV.K	631000	1020000	1500000	3890000	4110000	4310000	N	Y	3.42	10.06	0.7	5.49	1	122	135
13	13		Orcokinin	K.NFDEIDRSGFDR.F	7840000	6930000	7240000	17100000	16800000	16500000	Y	Y	10	60	1.1	5.35	2	122	133
13	13		Orcokinin	K.NFDEIDRSGFSG.F	6940000	7000000	6620000	12900000	14200000	14500000	N	Y	9.03	60	0.2	2.35	1	138	149
13	13		Orcokinin	R.NFDEIDRSGFNS.F	10600000	10800000	10700000	10800000	10400000	10900000	Y	Y	10.44	60	0.5	2.51	1	106	117
13	13		Orcokinin	R.NFDEIDRSGF.N	916000	949000	817000	420000	398000	526000	N	Y	3.51	16.38	1	10.46	1	106	115
13	13		Orcokinin	R.NFDEIDRSG.F	9000000	7080000	7170000	4910000	4410000	4240000	N	Y	7.71	57.48	0.8	1.92	1	106	114
13	13		Orcokinin	R.NFDEIDRS.G	23100000	17100000	17200000	1110000	957000	724000	N	Y	5.38	60	0.9	20.56	1	106	113
13	13		Orcokinin	N.FDEIDRSGFDR.F	6570000	6250000	5690000	15300000	13500000	14900000	N	Y	8.4	60	0.7	6.43	2	123	133
13	13		Orcokinin	N.FDEIDRSGFNS.F	7470000	7030000	7520000	6550000	6370000	6350000	N	Y	8.32	60	1	3.45	1	107	117
13	13		Orcokinin	N.FDEIDRSGFSG.F	5030000	4570000	4440000	10900000	10700000	10900000	N	Y	8.42	60	1.5	3.93	1	139	149
13	13		Orcokinin	F.DEIDRSGFNS.F	2210000	1950000	1810000	0	1050000	1040000	N	Y	4.2	11.75	1.5	6.72	1	108	117
13	13		Orcokinin	F.DEIDRSGFDR.F	2840000	2370000	2220000	1930000	1940000	1630000	N	Y	4.86	13.26	0.8	5.51	2	124	133
13	13		Orcokinin	F.DEIDRSGFSG.F	1390000	1210000	1220000	1720000	1510000	1550000	N	Y	4.03	10.65	2.5	3.64	1	140	149
13	13		Orcokinin	D.EIDRSGFNSFI.K	561000	645000	649000	3330000	3550000	3680000	N	Y	3.86	13.61	0.9	5.7	1	109	119
13	13		Orcokinin	D.EIDRSGFDRFV.K	0	1280000	1540000	2690000	2750000	2830000	N	Y	2.65	5.54	1.3	3.61	1	125	135
4	18	sNPF	sNPF	K.SNRSPSLRLRF(-.98).G	8700000	8250000	7740000	17800000	16800000	16900000	N	Y	4.06	10.72	0.8	3.65	1	64	74	Amidation
4	18		sNPF	R.SPSLRLRF(-.98).G	14900000	14200000	15600000	26800000	25800000	22400000	Y	Y	12.73	60	1.4	2.76	1	67	74	Amidation
4	18		sNPF	K.SNRSPSLRL.R	1710000	1580000	1280000	21700000	12600000	11500000	N	Y	8.69	60	0.5	9.99	1	64	72
4	18		sNPF	K.SNRSPSLRLR.F	851000	535000	520000	4930000	3630000	2420000	N	Y	5.62	48.14	0.5	6.48	1	64	73
4	18		sNPF	S.NRSPSLRL.R	894000	644000	632000	8980000	6040000	4220000	N	Y	5.06	33.88	0.4	9.2	1	65	72
4	18		sNPF	P.SLRLRF(-.98).G	643000	0	605000	2150000	2040000	1880000	N	Y	2.92	6.97	0.7	4.2	1	69	74	Amidation
83	2085	Allatotropin	AKN21240.1	R.GFKNVALSTARGF(-.98).G	2470000	2480000	2730000	2590000	1980000	3080000	N	Y	4.45	11.53	0.8	6.59	2	40	52	Amidation
83	2085		AKN21240.1	K.NVALSTARGF(-.98).G	0	2560000	2600000	3470000	3180000	3080000	Y	Y	9.43	60	0.5	5.36	1	43	52	Amidation
7	14	AKH1	P55319.1	C.SAQLNFTPNWGT(-.98).G	10200000	10100000	12800000	48500000	53500000	53200000	N	Y	9.03	60	0.3	4.91	1	21	32	Amidation
7	14		P55319.1	S.AQLNFTPNWGT(-.98).G	2440000	3130000	2980000	20100000	21500000	21200000	N	Y	7.88	60	0.6	7.35	1	22	32	Amidation
7	14		P55319.1	A.Q(-17.03)LNFTPNWGTGKRD.A	511000	689000	680000	2300000	2440000	2670000	N	Y	4.3	8.48	0.6	4.55	1	23	36	Pyro-glu from Q
7	14		P55319.1	A.Q(-17.03)LNFTPNWGTGKR.D	82200000	105000000	106000000	19600000	21900000	21500000	N	Y	10.83	60	0.8	4.65	1	23	35	Pyro-glu from Q
7	14		P55319.1	A.Q(-17.03)LNFTPNWGTGK.R	72400000	86600000	108000000	85800000	96000000	95300000	N	Y	35.32	6.9	1.2	1.15	1	23	34	Pyro-glu from Q
7	14		P55319.1	A.Q(-17.03)LNFTPNWGTG.K	65800000	109000000	115000000	83200000	93500000	103000000	N	Y	14.95	60	0.8	1.8	1	23	33	Pyro-glu from Q
7	14		P55319.1	A.Q(-17.03)LNFTPNWGT(-.98).G	9110000000	10200000000	9270000000	12300000000	5360000000	16400000000	Y	Y	20.03	44.57	0.8	1.58	5	23	32	Pyro-glu from Q; Amidation
7	14		P55319.1	A.Q(-17.03)LNFTPNWGT.G	19000000	38500000	34500000	38100000	43300000	38900000	N	Y	10.67	60	0.8	2.97	1	23	32	Pyro-glu from Q
7	14		P55319.1	A.QLNFTPNWGT(-.98).G	4480000	4990000	4420000	24900000	26700000	26500000	N	Y	7.2	60	1.2	6.29	1	23	32	Amidation
7	14		P55319.1	A.Q(-17.03)LNFTPNWG.T	26000000	33600000	35200000	68700000	77800000	102000000	N	Y	8.63	60	0.7	4.86	1	23	31	Pyro-glu from Q
7	14		P55319.1	A.Q(-17.03)LNFTPNW.G	1200000	1930000	2160000	21900000	34900000	37300000	N	Y	5.77	60	0.5	21.57	1	23	30	Pyro-glu from Q
7	14		P55319.1	A.Q(-17.03)LNFTPN.W	367000000	373000000	331000000	20400000	28300000	27200000	N	Y	8.49	60	0.5	14.11	1	23	29	Pyro-glu from Q
7	14		P55319.1	A.QLNFTPNWGTGK.R	22100000	27200000	28300000	24300000	21600000	21300000	N	Y	10.49	17.17	0.5	1.3	1	23	34
7	14		P55319.1	Q.LNFTPNWGT(-.98).G	162000000	152000000	198000000	191000000	217000000	217000000	N	Y	50.56	60	0.7	1.99	1	24	32	Amidation
7	14		P55319.1	Q.LNFTPNWGTGK.R	1210000	1520000	1350000	1340000	1360000	1520000	N	Y	5.31	2.75	1	1.46	1	24	34
7	14		P55319.1	L.NFTPNWGT(-.98).G	104000000	84900000	73300000	53100000	51500000	64400000	N	Y	10.08	41.16	1	1.55	2	25	32	Amidation
7	14		P55319.1	L.NFTPNWGTGK.R	1860000	1530000	1680000	663000	677000	613000	N	Y	4.37	4.49	1.4	2.59	1	25	34
49	63	ETH	ETH	A.APEEGGGLLLKP.H	2860000	2490000	2310000	324000	363000	361000	Y	Y	2.34	8.68	5.6	7.3	1	23	34
1	1	Pyrokinin 1	AYC12049.1	R.RQQPFVPRL(-.98).G	121000000	116000000	102000000	267000000	296000000	265000000	N	Y	26.91	60	0.7	4.49	2	113	121	Amidation
1	1		AYC12049.1	R.Q(-17.03)QPFVPRL(-.98).G	65100000	69700000	66400000	79500000	82900000	87300000	N	Y	24.91	48.4	0.8	1.62	1	114	121	Pyro-glu from Q; Amidation
1	1		AYC12049.1	R.Q(-17.03)QPFVPRL.G	1120000	1170000	1200000	6950000	7610000	7430000	N	Y	4.95	25.69	0.5	9.56	1	114	121	Pyro-glu from Q
1	1		AYC12049.1	R.QQPFVPRL(-.98).G	74900000	68500000	70400000	149000000	156000000	158000000	Y	Y	61.46	60	0.5	2.98	1	114	121	Amidation
1	1		AYC12049.1	R.Q(-17.03)QPFVPR.L	7950000	6840000	6650000	8140000	8020000	8740000	N	Y	9.49	60	1.1	4.48	1	114	120	Pyro-glu from Q
1	1		AYC12049.1	R.RQQPFVPRL.G	637000	666000	612000	5430000	5430000	5570000	N	Y	5.68	60	0.7	23.13	1	113	121
1	1		AYC12049.1	R.QQPFVPRL.G	1720000	1400000	1180000	16900000	17300000	17700000	N	Y	5.4	60	0.6	17.29	1	114	121
1	1		AYC12049.1	R.RQQPFVP.R	45100000	35400000	36100000	5310000	5350000	5400000	N	Y	11.42	60	0.8	7.27	1	113	119
1	1		AYC12049.1	R.QQPFVP.R	23600000	23800000	24700000	9090000	8100000	8770000	N	Y	4.74	4.85	0.3	2.78	1	114	119
1	1		AYC12049.1	G.RDSGDEWPQQPFVPRL(-.98).G	388000	380000	647000	1030000	1070000	1160000	N	Y	3.85	13.56	0.7	5.66	1	123	138	Amidation
1	1		AYC12049.1	R.DSGDEWPQQPFVPRLGR.R	541000	979000	1160000	632000	605000	649000	N	Y	3.49	7.81	0.8	3.7	1	124	140
1	1		AYC12049.1	R.DSGDEWPQQPFVPRLG.R	338000	468000	759000	1720000	1810000	1770000	N	Y	4.14	24.34	1.4	16.03	1	124	139
1	1		AYC12049.1	R.DSGDEWPQQPFVPRL(-.98).G	103000000	154000000	226000000	524000000	547000000	469000000	N	Y	12.33	60	0.7	5.06	5	124	138	Amidation
1	1		AYC12049.1	D.SGDEWPQQPFVPRL(-.98).G	20000000	29000000	36200000	109000000	124000000	114000000	N	Y	8.03	60	1.2	6.43	3	125	138	Amidation
1	1		AYC12049.1	D.SGDEWPQQPFVPRL.G	189000	456000	437000	7840000	8560000	7980000	N	Y	3.05	32.9	3.7	64	1	125	138
1	1		AYC12049.1	R.DSGDEWPQQPFVPRL.G	622000	1450000	2090000	39400000	42700000	45000000	N	Y	4.16	41.8	1.2	63.49	2	124	138
1	1		AYC12049.1	R.DSGDEWPQQPFVPR.L	54300000	62100000	76300000	67900000	70800000	74300000	N	Y	10.61	60	1.1	5.4	3	124	137
1	1		AYC12049.1	R.DSGDEWPQQPFVP.R	15700000	20100000	23900000	10100000	11300000	11000000	N	Y	7.86	52.23	0.8	1.84	1	124	136
1	1		AYC12049.1	D.EWPQQPFVPRL(-.98).G	1590000	2860000	2970000	13500000	15300000	14100000	N	Y	5.49	60	0.9	14.66	2	128	138	Amidation
1	1		AYC12049.1	D.SGDEWPQQPFVPR.L	3500000	4210000	4000000	8710000	9030000	9360000	N	Y	7.49	60	1	16.8	1	125	137
1	1		AYC12049.1	S.GDEWPQQPFVPRL(-.98).G	17000000	23400000	30600000	66600000	78300000	69300000	N	Y	7.99	60	0.5	4.59	2	126	138	Amidation
1	1		AYC12049.1	S.GDEWPQQPFVPRL.G	0	115000	200000	2820000	2930000	2870000	N	Y	3.49	38.43	0.8	50.55	1	126	138
1	1		AYC12049.1	S.GDEWPQQPFVPR.L	4190000	5020000	5050000	4890000	4990000	4820000	N	Y	5.37	43.92	0.8	6.17	2	126	137
1	1		AYC12049.1	G.DEWPQQPFVPRL(-.98).G	15600000	28900000	37300000	11800000	12600000	12600000	N	Y	5.66	11.71	1	2.21	2	127	138	Amidation
1	1		AYC12049.1	G.DEWPQQPFVPR.L	3170000	3930000	3680000	949000	883000	935000	N	Y	4.71	13.42	0.9	6.75	1	127	137
1	1		AYC12049.1	D.EWPQQPFVPR.L	343000	349000	360000	1650000	1750000	1660000	N	Y	2.81	35.03	1.8	42.57	1	128	137
1	1		AYC12049.1	A.GPFVPRL(-.98).G	2220000	1790000	1870000	18400000	18200000	19000000	N	Y	9.24	60	0.7	9.47	1	67	73	Amidation
1	1		AYC12049.1	G.PFVPRL(-.98).G	786000	651000	796000	6190000	5450000	5790000	N	Y	5.09	60	1.6	22.64	1	68	73	Amidation
1	1		AYC12049.1	E.EQVLAGPFVPRL(-.98).G	107000	185000	165000	1690000	1930000	1820000	N	Y	3.52	31.29	0.7	24.35	1	62	73	Amidation
1	1		AYC12049.1	L.AGPFVPRL(-.98).G	23600000	21200000	21500000	14600000	13400000	15200000	N	Y	10.08	60	0.4	2.84	1	66	73	Amidation
1	1		AYC12049.1	R.GAVPAAQFSPRL(-.98).G	55900000	69300000	66100000	303000000	332000000	345000000	N	Y	27.62	60	0.8	7.82	2	76	87	Amidation
1	1		AYC12049.1	R.GAVPAAQFSPRL.G	435000	490000	412000	17600000	17500000	17700000	N	Y	4.56	37	1	64	1	76	87
1	1		AYC12049.1	R.GAVPAAQFSPRLG.R	643000	870000	930000	1340000	1420000	1420000	N	Y	3.22	10.05	5.3	6.26	1	76	88
1	1		AYC12049.1	R.GAVPAAQFSPR.L	10800000	8520000	8550000	31800000	30900000	31300000	N	Y	15.11	60	0.8	7.02	1	76	86
1	1		AYC12049.1	G.AVPAAQFSPRL(-.98).G	6540000	6740000	6840000	33200000	30800000	32400000	N	Y	9.69	60	1.1	7.5	1	77	87	Amidation
1	1		AYC12049.1	G.AVPAAQFSPRL.G	454000	480000	460000	1950000	1930000	2030000	N	Y	3.66	24.01	6.7	11.83	1	77	87
1	1		AYC12049.1	G.AVPAAQFSPR.L	4270000	3210000	3110000	2980000	3010000	2750000	N	Y	8.61	60	0.8	2.63	1	77	86
1	1		AYC12049.1	A.VPAAQFSPRL(-.98).G	83300000	82000000	78200000	150000000	141000000	150000000	Y	Y	57.77	60	0.6	2.66	1	78	87	Amidation
1	1		AYC12049.1	A.VPAAQFSPRL.G	1150000	1030000	990000	6490000	6690000	6660000	N	Y	6.35	60	0.9	14.69	1	78	87
1	1		AYC12049.1	A.VPAAQFSPR.L	59300000	48500000	48300000	10500000	10800000	10600000	N	Y	12.43	60	0.6	4.89	1	78	86
1	1		AYC12049.1	A.VPAAQFSP.R	6000000	5190000	5370000	0	688000	719000	N	Y	3.81	17.86	1.3	7.85	1	78	85
1	1		AYC12049.1	V.PAAQFSPRL(-.98).G	8210000	6760000	6930000	15300000	16200000	16000000	N	Y	10.93	60	0.5	6.72	1	79	87	Amidation
1	1		AYC12049.1	V.PAAQFSPRL.G	912000	886000	912000	864000	739000	755000	N	Y	3.28	7.22	4.4	4.3	1	79	87
1	1		AYC12049.1	A.AQFSPRL(-.98).G	8050000	6370000	6120000	12800000	8600000	4970000	N	Y	9.35	24.59	0.7	1.41	1	81	87	Amidation
1	1		AYC12049.1	R.RLHQNGMPFSPRL(-.98).G	47200000	45800000	47800000	146000000	155000000	142000000	N	Y	9.97	60	0.9	5.42	3	141	153	Amidation
1	1		AYC12049.1	R.RLHQNGMPFSPR.L	1770000	1450000	1170000	4600000	5120000	5480000	N	Y	2.56	10.27	1.2	7.29	2	141	152
1	1		AYC12049.1	R.RLHQNGMPFSP.R	2020000	1660000	1200000	5940000	6250000	6270000	N	Y	4.63	11.79	0.8	6.77	2	141	151
1	1		AYC12049.1	R.LHQNGMPFSPRL(-.98).G	13100000	12800000	14000000	78600000	92800000	97500000	N	Y	10.89	60	0.4	13.03	2	142	153	Amidation
1	1		AYC12049.1	R.LHQNGMPFSPR.L	2650000	2650000	2140000	3350000	3100000	3340000	N	Y	3.91	11.3	2.8	3.84	2	142	152
1	1		AYC12049.1	L.HQNGMPFSPRL(-.98).G	5330000	3780000	4470000	68700000	63800000	60900000	N	Y	9.53	60	0.9	25.62	2	143	153	Amidation
1	1		AYC12049.1	L.HQNGMPFSPR.L	1570000	731000	1240000	3010000	3430000	3180000	N	Y	4.48	13.81	0.9	8.34	2	143	152
1	1		AYC12049.1	H.Q(-17.03)NGMPFSPRL(-.98).G	8310000	7990000	8850000	19400000	20900000	17400000	N	Y	5.44	22.19	3.1	3.38	2	144	153	Pyro-glu from Q; Amidation
1	1		AYC12049.1	H.QNGMPFSPRL(-.98).G	22700000	24200000	23500000	102000000	102000000	113000000	N	Y	24.33	60	0.9	5.76	1	144	153	Amidation
1	1		AYC12049.1	H.Q(-17.03)NGMPFSPRL.G	240000	231000	197000	1670000	1830000	1790000	N	Y	4.6	18.49	0.6	15.54	1	144	153	Pyro-glu from Q
1	1		AYC12049.1	H.Q(-17.03)NGMPFSPR.L	1690000	1590000	0	1590000	1670000	1750000	N	Y	5.15	7.1	0.7	2.25	1	144	152	Pyro-glu from Q
1	1		AYC12049.1	H.QNGMPFSPRL.G	1100000	1080000	1030000	9180000	9320000	9190000	N	Y	6.76	60	0.8	15.58	1	144	153
1	1		AYC12049.1	Q.NGMPFSPRL(-.98).G	2680000	2570000	2720000	35400000	36300000	37200000	N	Y	8.86	60	1.9	23.88	1	145	153	Amidation
1	1		AYC12049.1	Q.NGMPFSPR.L	0	1250000	1140000	3540000	3170000	3440000	N	Y	4.88	23.8	1.5	8.64	1	145	152
1	1		AYC12049.1	N.GMPFSPRL(-.98).G	9910000	9520000	9820000	29000000	27800000	30400000	N	Y	8.44	60	1.2	5.94	1	146	153	Amidation
1	1		AYC12049.1	L.HQNGMPFSP.R	2510000	2510000	2350000	4970000	4950000	4940000	N	Y	6.58	60	0.8	4.47	1	143	151
1	1		AYC12049.1	R.LHQNGMPFSP.R	1200000	1090000	1350000	3200000	3060000	2980000	N	Y	6.45	60	1.2	9.87	1	142	151
1	1		AYC12049.1	N.GMPFSPR.L	4490000	3500000	3330000	2810000	2640000	2570000	N	Y	7.84	60	1.6	4.22	1	146	152
1	1		AYC12049.1	G.MPFSPRL(-.98).G	4870000	4590000	4060000	9790000	9010000	9300000	N	Y	9.91	60	1	6.95	1	147	153	Amidation
1	1		AYC12049.1	G.MPFSPR.L	1370000	981000	948000	814000	588000	346000	N	Y	5.19	10.22	1.1	2.76	1	147	152
1	1		AYC12049.1	R.DPPVDGPLVWLPLQVSPR.L	960000	1020000	1620000	91000000	124000000	101000000	N	Y	4.99	60	1.5	64	2	91	108
1	1		AYC12049.1	R.DPPVDGPLVWLPL.Q	2920000	3870000	3410000	8560000	9830000	13800000	N	Y	5.51	20.22	1.2	3.16	1	91	103
1	1		AYC12049.1	R.DPPVDGPLVWLP.L	15500000	25100000	30300000	5530000	4740000	6570000	N	Y	5.25	43.56	0.7	12	1	91	102
1	1		AYC12049.1	R.DPPVDGPLV.W	3120000	3350000	3220000	1430000	1550000	1630000	N	Y	6.15	60	0.5	5.95	1	91	99
1	1		AYC12049.1	R.DPPVDGPL.V	1600000	1590000	1620000	4810000	4810000	5200000	N	Y	4.96	33.83	1.1	14.24	2	91	98
1	1		AYC12049.1	D.GPLVWLPLQVSPR.L	61400	111000	186000	1940000	2740000	2040000	N	Y	3.1	18.53	0.9	18.91	1	96	108
1	1		AYC12049.1	W.LPLQVSPRLA.R	475000	371000	0	6890000	6950000	7000000	N	Y	3.47	21.74	0.8	16.41	1	101	110
1	1		AYC12049.1	W.LPLQVSPR.L	904000	782000	1000000	5370000	5410000	5360000	N	Y	6.56	60	0.6	6.48	1	101	108
1	1		AYC12049.1	W.QGGEPQQEEQVLAGPFVPRL(-.98).G	3490000	5910000	9110000	2280000	2630000	2450000	N	Y	4.29	5.65	1.2	3.1	1	54	73	Amidation
1	1		AYC12049.1	W.QGGEPQQEEQVLAGPFVPR.L	5310000	10000000	11000000	191000	401000	0	N	Y	2.58	23.68	1.7	29.65	1	54	72
1	1		AYC12049.1	A.Q(-17.03)FSPRL(-.98).G	2120000	2170000	1920000	2650000	2680000	2870000	N	Y	7.16	60	0.6	1.93	1	82	87	Pyro-glu from Q; Amidation
1	1		AYC12049.1	R.EGDFTPRL(-.98).G	225000000	199000000	191000000	990000000	681000000	692000000	Y	Y	41.28	60	0.9	5.78	2	32	39	Amidation
1	1		AYC12049.1	R.EGDFTPRL.G	3460000	2980000	2540000	98500000	92300000	102000000	N	Y	11.41	60	0.4	50.25	1	32	39
1	1		AYC12049.1	E.GDFTPRL(-.98).G	2140000	1660000	1570000	6500000	6130000	6090000	N		9.83	60	0.6	8.23	1	33	39	Amidation
1	1		AYC12049.1	G.DFTPRL(-.98).G	51400000	47500000	46000000	25200000	24600000	24900000	N		16.36	60	0.9	1.94	1	34	39	Amidation
47	251	AKH3	P19872.3	A.Q(-17.03)LNFTPWWGKR.A	79000	151000	214000	1300000	1340000	1270000	N	Y	3.22	22.65	1.1	21.98	1	23	33	Pyro-glu from Q
47	251		P19872.3	A.Q(-17.03)LNFTPWW(-.98).G	2660000	3030000	2830000	326000000	577000000	535000000	Y	Y	7.52	60	0.7	64	1	23	30	Pyro-glu from Q; Amidation
47	251		P19872.3	S.RAQLNFTPWW(-.98).G	309000	0	63400	2250000	2310000	2110000	N	Y	3.15	27.4	5.7	33.15	1	21	30	Amidation
47	251		P19872.3	A.Q(-17.03)LNFTPW.W	26700000	29400000	31600000	5720000	11400000	12500000	N	Y	6.36	60	0.8	6.6	1	23	29	Pyro-glu from Q
47	251		P19872.3	A.Q(-17.03)LNFTP.W	1550000	1710000	1780000	1290000	1820000	1860000	N		4.89	3.17	0.6	1.7	1	23	28	Pyro-glu from Q
107	3062	GPB5	GPB5	R.SGPFKAL.G	1350000	1210000	1170000	14600000	11800000	8140000	Y	Y	7.98	60	1	9.28	1	144	150
44	201	Pyrokinin 2	P41488.1	Q(-17.03)SVPTFTPRL(-.98)	93000000	109000000	94300000	131000000	151000000	143000000	Y	Y	29.31	43.11	0.5	1.57	1	1	10	Pyro-glu from Q; Amidation
44	201		P41488.1	Q(-17.03)SVPTFTPR.L	23000000	22500000	23400000	12000000	12400000	12800000	N	Y	11.88	60	1.4	2.54	1	1	9	Pyro-glu from Q
44	201		P41488.1	Q(-17.03)SVPTFTPRL	3440000	4250000	4000000	17200000	18700000	18700000	N	Y	6.4	60	1	6.98	1	1	10	Pyro-glu from Q
44	201		P41488.1	Q.SVPTFTPRL(-.98)	3270000	3110000	3150000	6550000	6360000	6740000	N	Y	8.26	60	0.9	4.23	1	2	10	Amidation
44	201		P41488.1	QSVPTFTPRL(-.98)	7640000	8050000	7440000	11800000	11700000	12200000	N	Y	6.51	44.77	1.2	1.67	2	1	10	Amidation
44	201		P41488.1	Q.SVPTFTPR.L	2030000	1340000	1530000	1110000	919000	947000	N	Y	5.64	28.66	0.6	3.99	1	2	9
44	201		P41488.1	S.VPTFTPRL(-.98)	0	540000	501000	1200000	1210000	1270000	N	Y	2.83	13.3	0.8	9.3	1	3	10	Amidation
44	201		P41488.1	Q.SVPTFTPRL	1370000	1090000	1070000	1250000	1280000	1240000	N	Y	5.13	6.43	1.1	2.13	1	2	10
9	59	Diuretic hormone 46	P23465.1	R.DAEEQIKANKDFLQQI(-.98)	35200000	56100000	81000000	159000000	185000000	126000000	Y	Y	12.19	60	1.6	2.76	2	31	46	Amidation
9	59		P23465.1	R.DAEEQIKANKDFLQ.Q	1620000	1510000	1300000	1240000	1400000	1520000	N	Y	2.99	4.61	1	2.88	1	31	44
9	59		P23465.1	R.DAEEQIKANKDF.L	2860000	2410000	2440000	23500000	27600000	26600000	N	Y	5.54	60	2.5	18.12	2	31	42
9	59		P23465.1	E.EQIKANKDFLQQI(-.98)	1070000	1050000	1000000	7330000	8370000	8360000	N	Y	5.95	60	0.6	19.66	1	34	46	Amidation
9	59		P23465.1	K.ANKDFLQQI(-.98)	5910000	5500000	5320000	3720000	3690000	3870000	N	Y	4.51	7.54	1.1	4.54	1	38	46	Amidation
9	59		P23465.1	G.MGPSLSIVNPMDVL.R	224000	662000	647000	14000000	19400000	13500000	N	Y	3.02	21.58	5.6	30.59	1	3	16
9	59		P23465.1	S.IVNPMDVL.R	393000	478000	461000	6040000	6650000	6490000	Y	Y	3.98	27.61	0.7	20.01	1	9	16
38	28		P04375.1	A.APAAYAAPAVA.A	29900000	506000	30100000	1660000	1500000	1640000	Y	Y	2.71	20.43	6.2	22.05	1	57	67
38	28		P04375.1	Y.AAPAIAAAPA.L	8810000	7880000	8100000	637000	509000	576000	N		3.1	15.87	0.6	14.39	1	75	84
38	28		P04375.1	A.APAVAAAPAI.G	4280000	5630000	5440000	346000	392000	422000	Y	Y	3.28	17.68	0.9	14.16	1	63	72
76	3681	ITP	AAD20820.1	S.SPLDAHHLA.K	41100000	29200000	26200000	38500000	30300000	26200000	N		17.3	60	0.8	2.03	1	43	51
76	3681		AAD20820.1	E.EEKFNQMVE.I	94200	410000	461000	9450000	11900000	12000000	Y	Y	4.45	33.28	7.7	29.75	1	115	123
112	26	Natalisin	AKN21249.1	R.AGAPELGLADDGRS.R	373000	423000	355000	1650000	2520000	3340000	Y	Y	2.66	7.61	3.9	7.03	1	40	53
112	26		AKN21249.1	R.EMELFWPAR(-.98).G	148000	142000	140000	181000	190000	170000	Y	Y	2.66	5.68	8	4.85	1	126	134	Amidation
105	30	RYamide	RY	T.IAQPESFALGSRY(-.98).G	0	146000	0	265000	314000	376000	Y	Y	2.6	25.99	6.9	48.19	1	43	55	Amidation
36	65	Kinin	Kinin	L.RNGNGNGPPFFPWG(-.98).G	1690000	2100000	2070000	547000	681000	736000	N	Y	3.77	3.59	0.7	2.64	1	118	131	Amidation
36	65		Kinin	R.AGVRFSSWG(-.98).G	2390000	2120000	1970000	7130000	7620000	7260000	N	Y	8.77	60	0.9	4.7	1	48	56	Amidation
36	65		Kinin	R.SKQAFYSWG(-.98).G	2760000	2570000	2430000	6200000	6650000	6460000	Y	Y	10.45	60	0.6	3.76	1	17	25	Amidation
17	2348	Corazonin	BAS29667.1	G.Q(-17.03)TFQYSHGWTN(-.98).G	68600000	74300000	68900000	260000000	240000000	251000000	N		25.14	60	1.5	3.79	2	26	36	Pyro-glu from Q; Amidation
17	2348		BAS29667.1	G.Q(-17.03)TFQYSHGWTN.G	6660000	7350000	8340000	19100000	13100000	15200000	N		9.76	60	0.7	2.74	1	26	36	Pyro-glu from Q
17	2348		BAS29667.1	G.Q(-17.03)TFQYSHGWT.N	306000	415000	452000	2770000	2710000	3090000	N		4.51	13.05	1.5	7.96	1	26	35	Pyro-glu from Q
17	2348		BAS29667.1	G.Q(-17.03)TFQYSHG.W	584000	557000	496000	732000	890000	984000	N		6.39	12.03	0.8	3.5	1	26	33	Pyro-glu from Q
17	2348		BAS29667.1	G.Q(-17.03)TFQYSH.G	610000	593000	588000	0	646000	583000	N		5.95	2.09	0.7	1.31	1	26	32	Pyro-glu from Q
17	2348		BAS29667.1	G.QTFQYSHGWTN.G	1290000	1250000	1420000	3890000	3380000	2750000	N		6.19	7.45	0.8	2.48	1	26	36
