# Supplementary material for: FUNCTIONALIZED POLYMERIC MEMBRANES FOR BIOSEPARATION AND BIOCATALYSIS
Source: eLife journal article supplement (doi:10.7554/elife.65279), 2007-01-01
Supplement: supp [file elife-65279-supp-v1.zip › elife_poa_e65279_Supplementary_file_2.docx]

Supplementary File 2. Mutation efficiency of G0 and G1 generation of ACP mutants.

| Generations | Embryos | Survival rate | Mutant efficiency |
| --- | --- | --- | --- |
| G0 | 162 (injected) | 52 (31.52%) | 44 (84.62%) |
| G1 | 201 | 155 (77.11%) | 74 (47.74%) |
