# Supplementary material for: FUNCTIONALIZED POLYMERIC MEMBRANES FOR BIOSEPARATION AND BIOCATALYSIS
Source: eLife journal article supplement (doi:10.7554/elife.65279), 2007-01-01
Supplement: supp [file elife-65279-supp-v1.zip › elife_poa_e65279_Supplementary_file_3.docx]

Supplementary File 3. Mutation efficiency of G0 and G1 generation of ACPR mutants.

| Generations | Embryos | Survival rate | Mutant efficiency |
| --- | --- | --- | --- |
| G0 | 288 (injected) | 108 (37.5%) | 56 (51.85%) |
| G1 | 188 | 136 (72.34%) | 62 (45.59%) |
