# Supplementary material for: FUNCTIONALIZED POLYMERIC MEMBRANES FOR BIOSEPARATION AND BIOCATALYSIS
Source: eLife journal article supplement (doi:10.7554/elife.65279), 2007-01-01
Supplement: supp [file elife-65279-supp-v1.zip › elife_poa_e65279_Supplementary_file_4.docx]

Supplementary File 4. Primers for qPCR, gRNA synthesis, and RNAi experiment.

| **Genes** | **Forward primer**  **(5’-3’)** | **Reverse primer**  **(5’-3’)** |
| --- | --- | --- |
| **ACP qPCR** | GCAAGGCTGCTCCTCACA | GTTGGCGAAGTTCGTTCA |
| **AKH2 qPCR** | TAGTGGTGGCGATGTTGG | TGTATGAGCCTGTAGAGGAACG |
| **NPF1 qPCR** | AACCTCAGAGTCTAAAAATA | GTAACAGTCGTGAAACCACA |
| **GPB5 qPCR** | CTGCTGCTGCTGTCGGTGGT | GCGTCGGTCTTGGTGACCTTGT |
| **AKH3 qPCR** | GCGCAGCTCAACTTCACGC | CGCCTCTGATGTAAACCTGCTG |
| **AST-A qPCR** | CAGTGATGCCGCAGGAGGT | CTCGGACACGTAGGTGTAGGC |
| **CAPA qPCR** | ATGGCCGCCCCCAGCACCAG | GCTGCTGCTCTGAAACGTTG |
| **DH46 qPCR** | GCAGACGCCCAGTTTCAGG | AGCGCTTGCCGATCTGCTG |
| **ILP qPCR** | ATGATGTGGAAGCTGTGCCT | CTCCGAGTCTGACACATCT |
| **OMP qPCR** | ATGTCCCCGGTGCGAGTGC | CTGCAGCAGCAGGCGCCG |
| **ACPR qPCR** | CACCCCAAGGACCCCAACT | AGTACATGGCGATCACGCAG |
| **FABP qPCR** | GCCGCAAGGTCAAGTCTATC | TATTCTCGTCGCCACCAAGT |
| **CROT qPCR** | CGGCTTCGGCAAGGAGTT | CGCACCCACTCCATCTGTTC |
| **CPT2 qPCR** | ACTTGGGTTCCAGGTTGC | CTGTCAAATCCCTGTCCC |
| **ACDM qPCR** | TCATTGTGGTGGACTTGG | TCTTCAATCAGGCGTCCC |
| **ACADS qPCR** | TGCTTTGAGTGAACCAGGAA | ACTAACAAGGAAGGCACT |
| **ACADSB qPCR** | CTGCCTTGGTTGACATAC | CGATTGTGGCTCCGATAAAC |
| **ECH-6 qPCR** | ACTTCTTGGGTCACTGGA | TGACTTCCCAACCATTCG |
| **ACAT1-qPCR** | TTTTCGTGGGAGTATGGC | ATTCCTGAGGCACAAACC |
| **CRAT qPCR** | GGCTTCACGCTTCCTACT | TCCAGGGATTCGGCAGGT |
| **rp49 qPCR** | CGCTACAAGAAGCTTAAGAGGTCAT | CCTACGGCGCACTCTGTTG |
| **ACPgenome** | GCACTCTGGGGGATGTAACT | CAAGGGAGGAATCGTAGCAT |
| **ACPRgenome** | CGCACTTTCAAGGCTAA | CTGTAGGGTGTCCATTATTT |
| **ACP RNAi** | TAATACGACTCACTATAGG  AGATACAAGCAGGGTGAA | TAATACGACTCACTATAGG  CTTCTGTTGGGTACTTCTA |
| **AKH2 RNAi** | TAATACGACTCACTATAGG  GGCGACCACAAACAGGATG | TAATACGACTCACTATAGG  GCTTCCTCGCCTCAATCTGT |
| **NPF1 RNAi** | TAATACGACTCACTATAGG  GCTACTACTCGCAGGTGG | TAATACGACTCACTATAGG  CGGATGTCGTCGATGACG |
| **GPB5 RNAi** | TAATACGACTCACTATAGG  CTGCTGCTGCTGTCGGTGGT | TAATACGACTCACTATAGG  GCGTCGGTCTTGGTGACCTTGT |
| **FABP RNAi** | TAATACGACTCACTATAGG  GGTCCACGAGCAGAAGG | TAATACGACTCACTATAGG  CACACCAAGCTCATATTAC |
| **GFP RNAi** | TAATACGACTCACTATAGG  CACAAGTTCAGCGTGTCCG | TAATACGACTCACTATAGG  GTTCACCTTGATGCCGTTC |
| **ACPgRNA** | TAATACGACTCACTATAGG  CATGGTGCTGCTACCTGG | TTCTAGCTCTAAAACCCA  GGTAGCAGCACCATGCC |
| **ACPRgRNA** | TAATACGACTCACTATAGG  TGCAGCACGGCGAAGTAG | TTCTAGCTCTAAAACCTA  CTTCGCCGTGCTGCACC |

Red font indicates T7 promoter sequence.
