# Supplementary figures and images for: FUNCTIONALIZED POLYMERIC MEMBRANES FOR BIOSEPARATION AND BIOCATALYSIS
Source: eLife journal article supplement (doi:10.7554/elife.65279), 2007-01-01

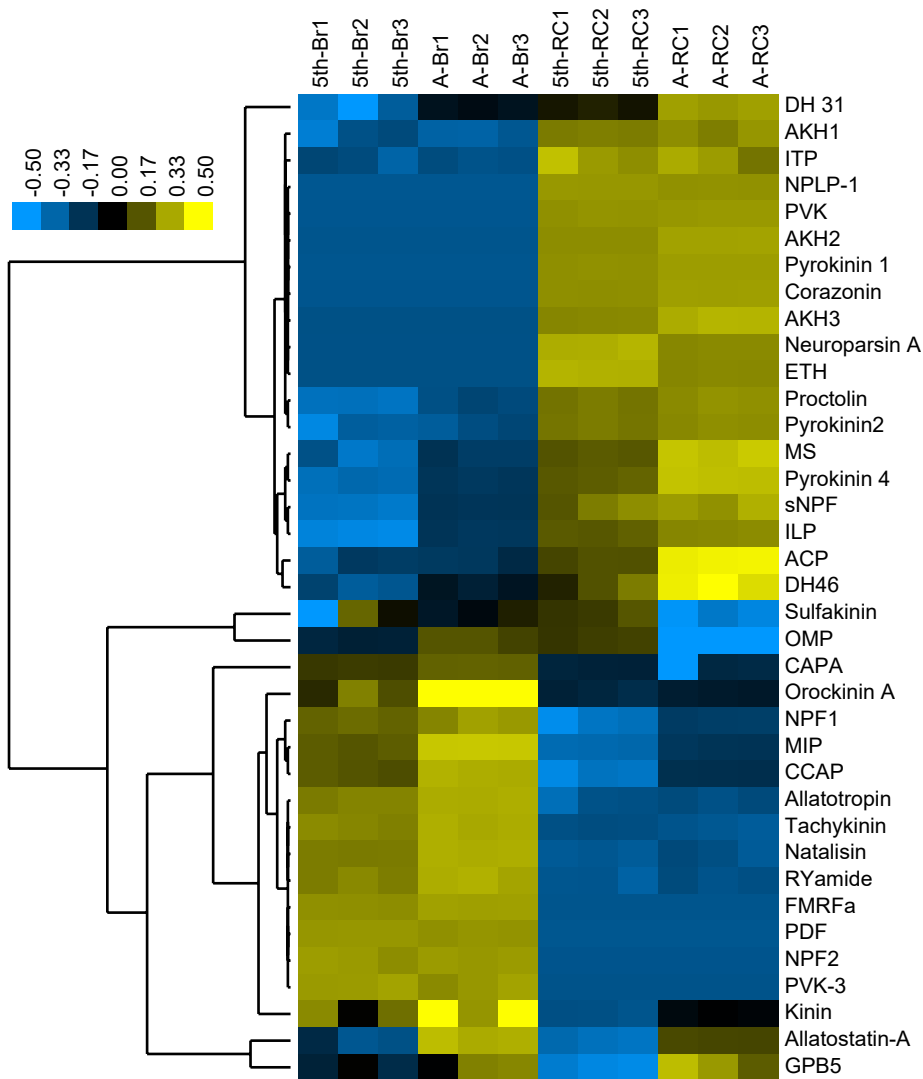

Supplement: supp [file elife-65279-supp-v1.zip › elife_poa_e65279_Figure_1_figure_supplement_1.pdf]

**A**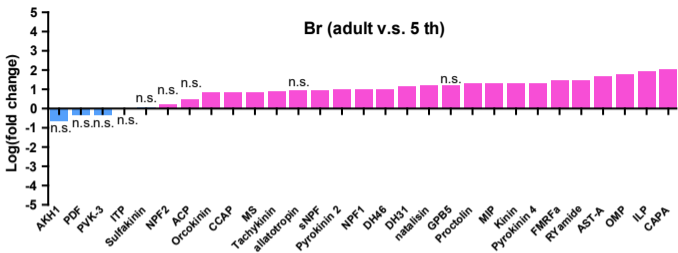**B**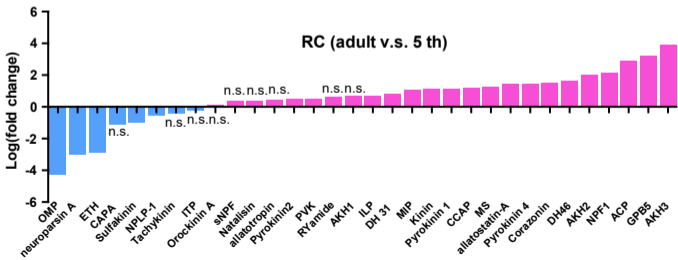

Supplement: supp [file elife-65279-supp-v1.zip › elife_poa_e65279_Figure_1_figure_supplement_2.pdf]

Br  
RC

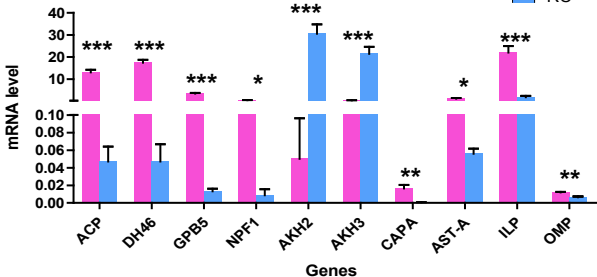

Supplement: supp [file elife-65279-supp-v1.zip › elife_poa_e65279_Figure_1_figure_supplement_3.pdf]

**AKH3**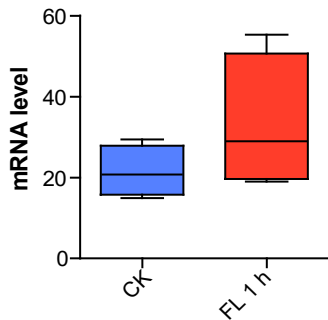**AST-A**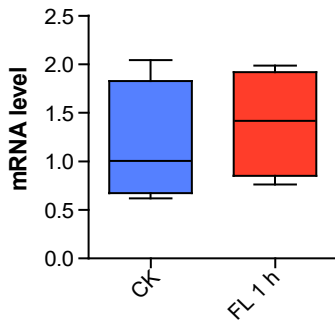**CAPA**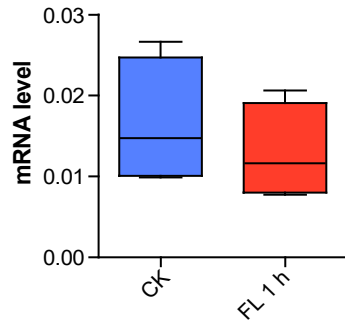**DH46**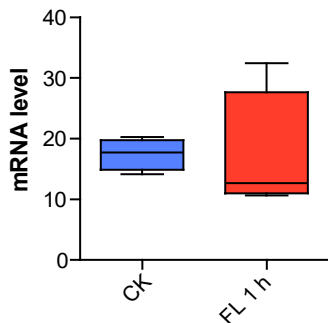**ILP**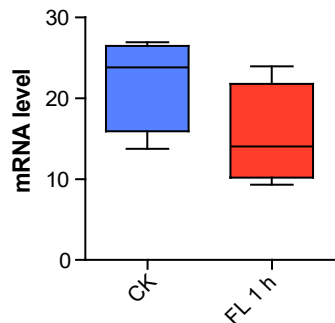**OMP**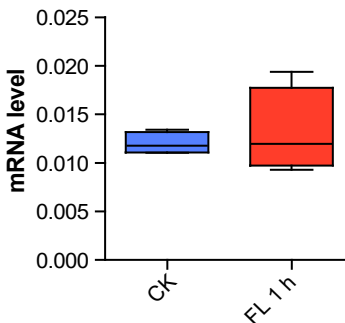

Supplement: supp [file elife-65279-supp-v1.zip › elife_poa_e65279_Figure_1_figure_supplement_4.pdf]

**ACP**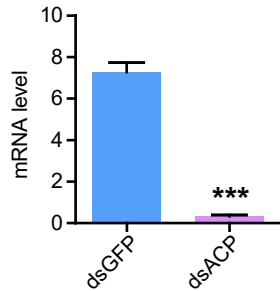**AKH2**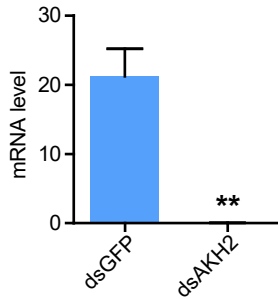**NPF1**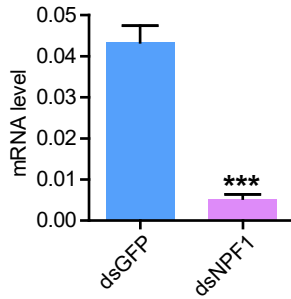**GPB5**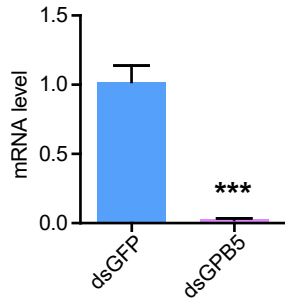

Supplement: supp [file elife-65279-supp-v1.zip › elife_poa_e65279_Figure_1_figure_supplement_5.pdf]

**A**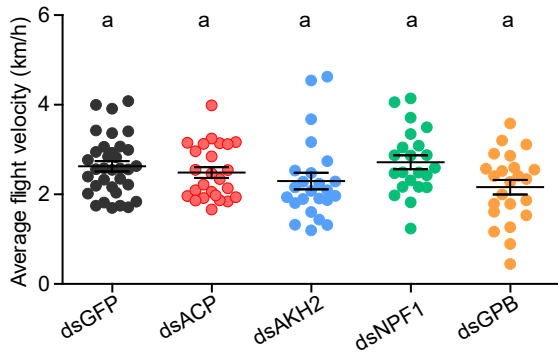**B**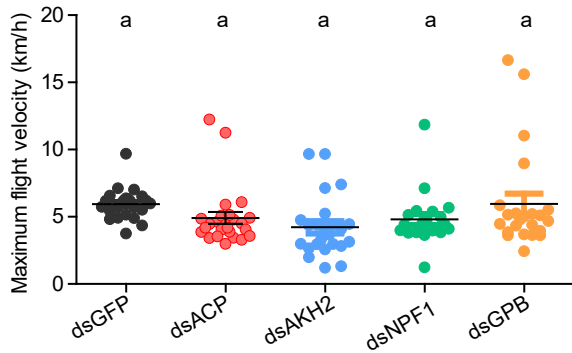

Supplement: supp [file elife-65279-supp-v1.zip › elife_poa_e65279_Figure_1_figure_supplement_6.pdf]

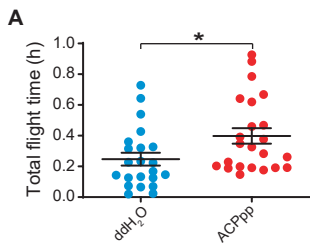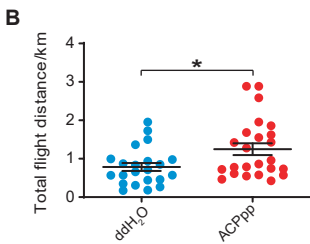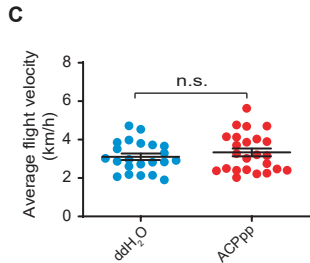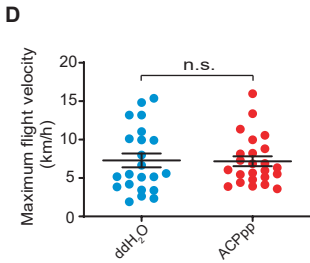

Supplement: supp [file elife-65279-supp-v1.zip › elife_poa_e65279_Figure_1_figure_supplement_7.pdf]

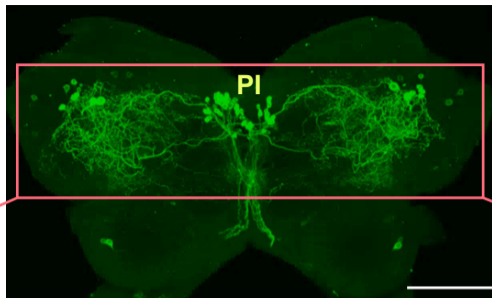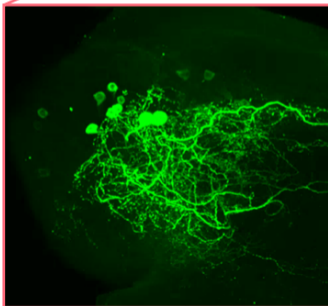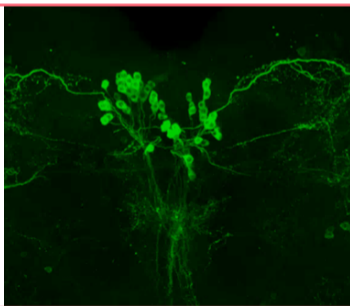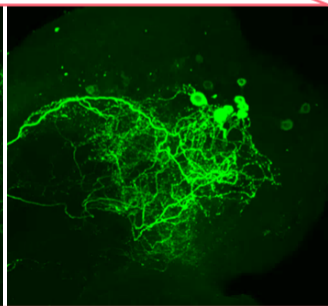

Supplement: supp [file elife-65279-supp-v1.zip › elife_poa_e65279_Figure_2_figure_supplement_2.pdf]

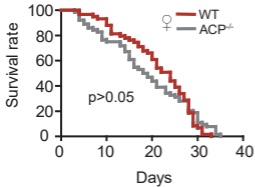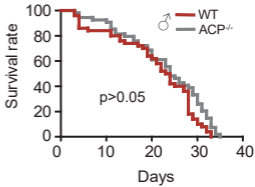

Supplement: supp [file elife-65279-supp-v1.zip › elife_poa_e65279_Figure_2_figure_supplement_3.pdf]

**A**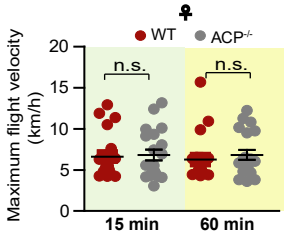**B**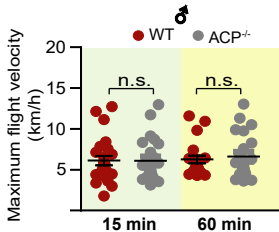

Supplement: supp [file elife-65279-supp-v1.zip › elife_poa_e65279_Figure_2_figure_supplement_4.pdf]

**WT**

**ACPR<sup>13/13</sup>**

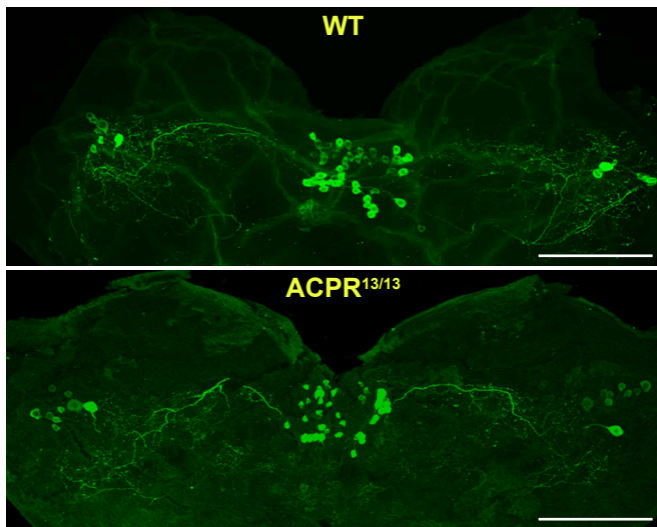

Supplement: supp [file elife-65279-supp-v1.zip › elife_poa_e65279_Figure_3_figure_supplement_1.pdf]

**A**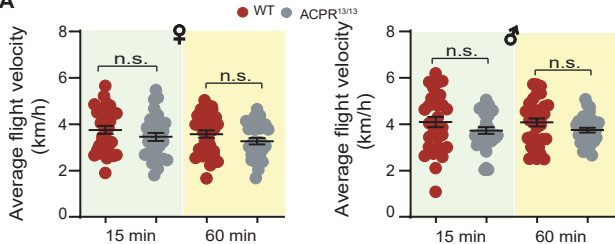**B**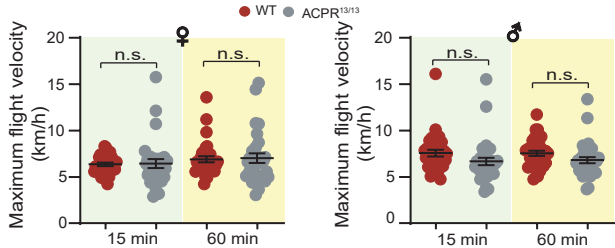

Supplement: supp [file elife-65279-supp-v1.zip › elife_poa_e65279_Figure_3_figure_supplement_2.pdf]

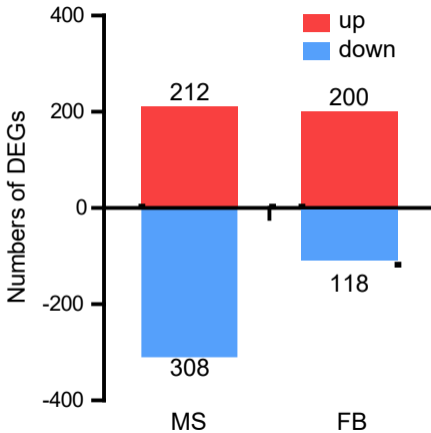

Supplement: supp [file elife-65279-supp-v1.zip › elife_poa_e65279_Figure_4_figure_supplement_1.pdf]

**A**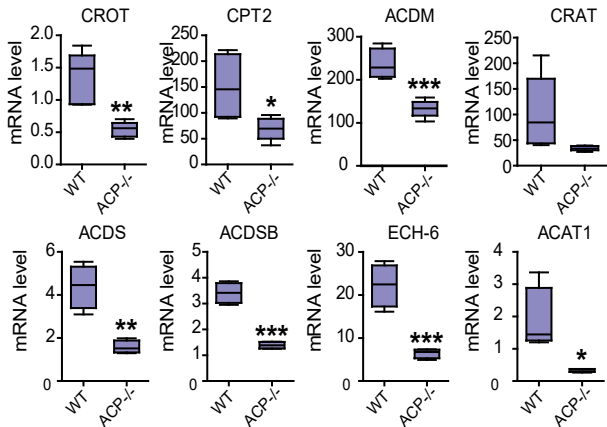**B**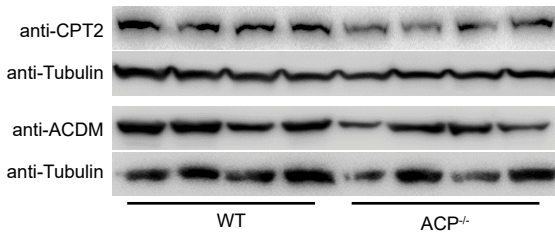

Supplement: supp [file elife-65279-supp-v1.zip › elife_poa_e65279_Figure_4_figure_supplement_2.pdf]

A

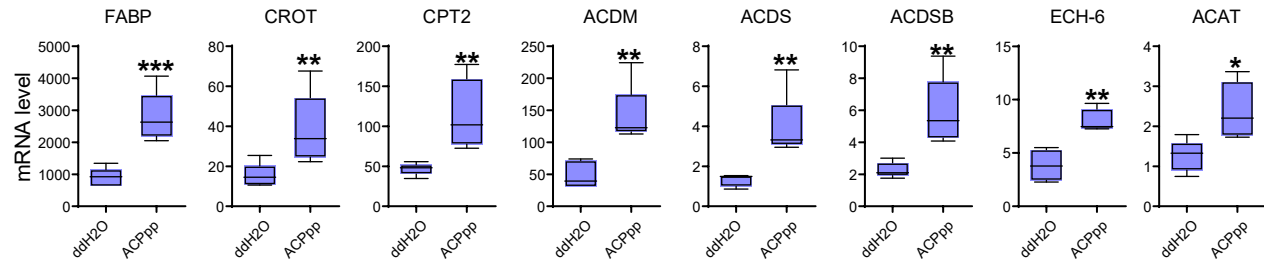

B

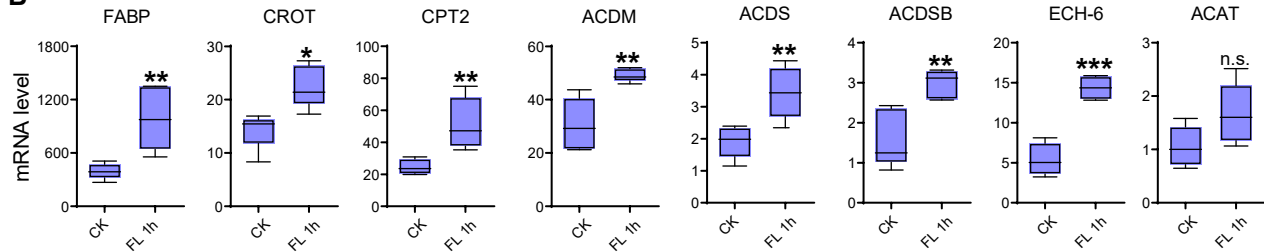

Supplement: supp [file elife-65279-supp-v1.zip › elife_poa_e65279_Figure_4_figure_supplement_3.pdf]

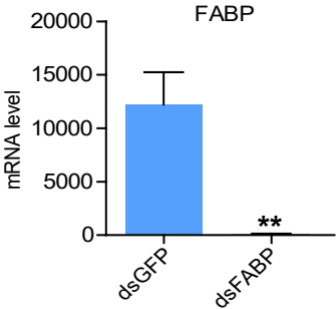

Supplement: supp [file elife-65279-supp-v1.zip › elife_poa_e65279_Figure_4_figure_supplement_4.pdf]

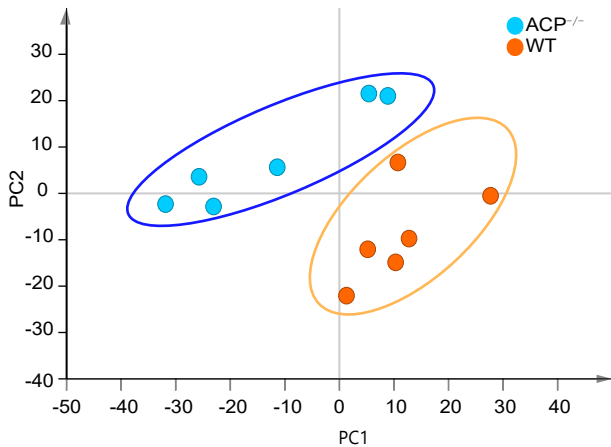

Supplement: supp [file elife-65279-supp-v1.zip › elife_poa_e65279_Figure_5_figure_supplement_2.pdf]

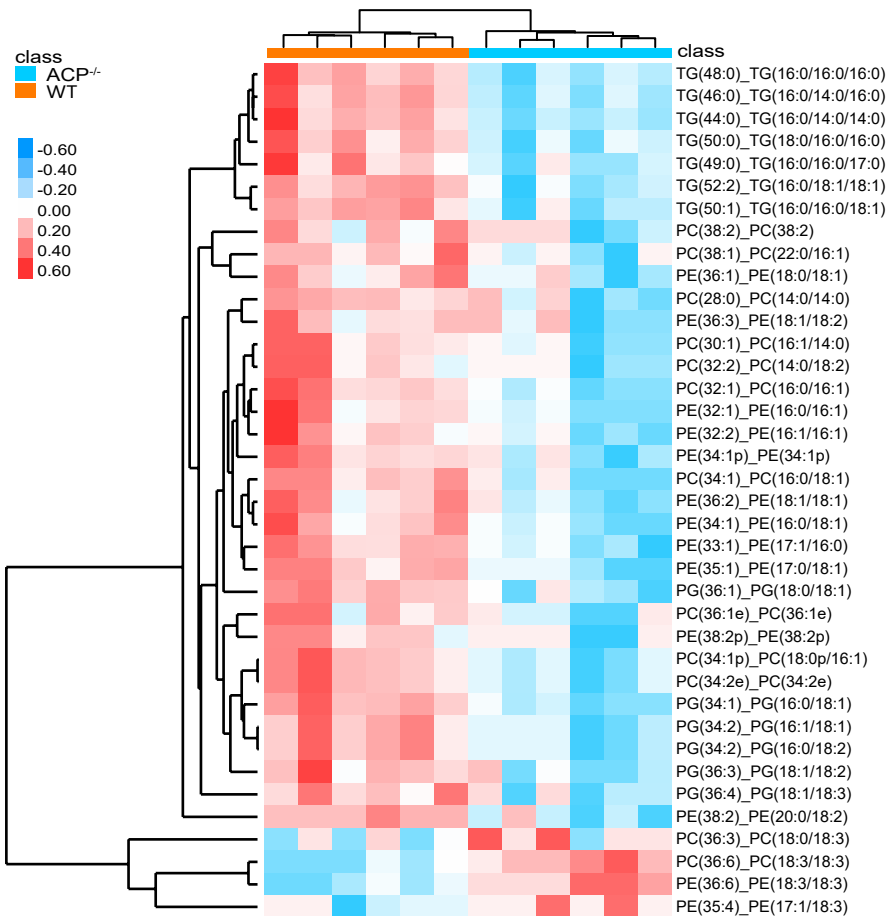

Supplement: supp [file elife-65279-supp-v1.zip › elife_poa_e65279_Figure_5_figure_supplement_3.pdf]

**A**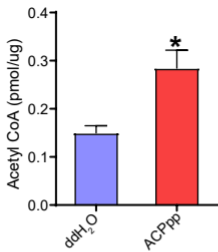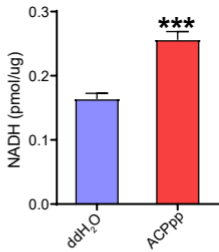**B**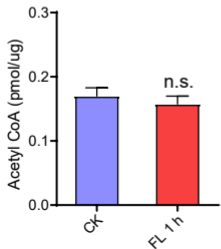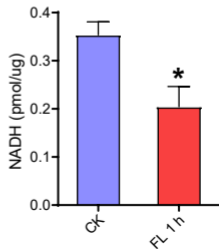

Supplement: supp [file elife-65279-supp-v1.zip › elife_poa_e65279_Figure_5_figure_supplement_4.pdf]

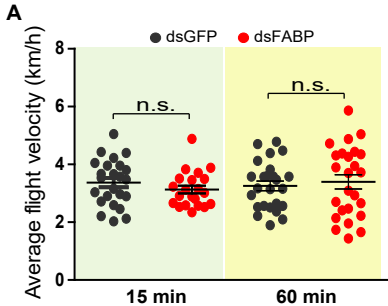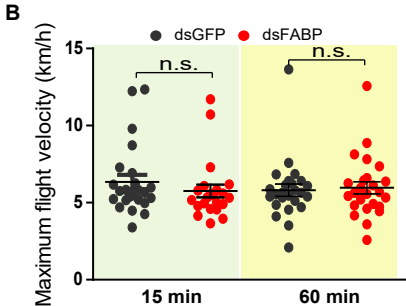

Supplement: supp [file elife-65279-supp-v1.zip › elife_poa_e65279_Figure_6_figure_supplement_1.pdf]
